# Supplementary material for: Stable Epigenetic Programming of Effector and Central Memory CD4 T Cells Occurs Within 7 Days of Antigen Exposure In Vivo
Source: Front Immunol. 2021 May 24;12:642807. doi: 10.3389/fimmu.2021.642807 (PMC8181421; doi:10.3389/fimmu.2021.642807)
Supplement: Supplementary file 2 [file Table_1.xlsx]

## Sheet: 984 M28 mDHSs
Annotation						Deseq 2 Fold changeanalysis															Read counts												Peak Groups
						M7/Naïve			M28/Naïve			M56/Naïve			M28Ag/M28			M56Ag/M56			Naïve		M7		M28		M56		M28Ag		M56Ag		M7		M28		M56		M28Ag
Chr	Start	End	Annotation	Distance to TSS	Closest gene	log2 FC	P-value	P-adj	log2 FC	P-value	P-adj	log2 FC	P-value	P-adj	log2 FC	P-value	P-adj	log2 FC	P-value	P-adj	N_1	N_2	M7_1	M7_2	M28_1	M28_2	M56_1	M56_2	M28Ag_1	M28Ag_2	M56Ag_1	M56Ag_2	840 M7 mDHSs	1193 M7 nDHSs	984 M28 mDHSs	803 M28 nDHSs	1010 M56 mDHSs	957 M56 nDHSs	6703 iDHSs	935 dDHSs
chr3	21126306	21126505	Intergenic	-759228	Agtr1b	5.10749	5.58604e-16	2.69258e-12	5.7274	1.03627e-19	1.66501e-15	5.65272	2.17648e-19	3.25593e-15	-0.949813	0.0308092	0.104331	-1.5087	0.0005986	0.00321347	1.49515	1.69136	112.88	132.565	145.461	238.675	164.236	197.263	130.847	59.956	47.0258	71.0092	1	0	1	0	1	0	0	0
chr10	88428058	88428257	intron (NM_001004164, intron 7 of 20)	-31430	Sycp3	5.1072	6.60669e-22	3.18456e-17	5.55263	1.3697e-25	6.60222e-21	5.60188	3.56671e-26	1.71922e-21	-0.724606	0.0854022	0.225121	-1.08742	0.0095144	0.0351239	6.72817	3.38272	311.048	247.975	336.696	437.304	332.647	467.087	333.932	121.846	153.453	208.826	1	0	1	0	1	0	0	0
chr7	51724090	51724289	Intergenic	102359	Slc17a6	5.32324	1.7938e-16	1.08081e-12	5.30718	2.6049e-16	1.29137e-12	5.33101	1.37741e-16	6.63941e-13	1.64395	0.000580222	0.00431137	0.637496	0.179907	0.346336	2.24272	0	161.168	149.721	132.237	176.203	152.405	160.436	820.518	197.275	207.903	288.238	1	0	1	0	1	0	1	0
chr14	73476503	73476702	Intergenic	-33447	Med4	3.36289	2.06102e-07	4.36592e-05	4.82935	5.99873e-14	1.25718e-10	4.29641	2.07752e-11	2.04368e-08	-3.65458	1.84936e-09	1.1807e-07	-1.50227	0.00599395	0.0236936	2.9903	5.07408	61.457	54.5858	65.1014	281.925	109.258	122.515	8.17792	13.5384	34.6506	40.7567	1	0	1	0	1	0	0	1
chr13	112398206	112398405	Intergenic	-65765	Il6st	4.93702	1.96393e-18	3.15552e-14	4.79325	2.71391e-17	1.8688e-13	5.04079	2.70191e-19	3.25593e-15	-0.554087	0.15208	0.338343	0.0518498	0.887122	0.938445	2.24272	3.38272	127.617	146.602	100.704	147.37	135.007	158.248	84.5052	81.2307	158.403	147.901	1	0	1	0	1	0	0	0
chr1	54660786	54660985	intron (NM_001081433, intron 21 of 27)	-103201	Pgap1	3.78817	1.37094e-10	1.06584e-07	4.79066	4.13601e-16	1.66137e-12	4.21835	7.11345e-13	9.79664e-10	-2.67787	7.98243e-07	1.87601e-05	-1.52647	0.00394101	0.0165532	7.47575	8.4568	110.058	190.27	119.013	507.785	153.101	255.239	51.7935	32.8791	49.5008	79.8328	1	0	1	0	1	0	0	1
chr11	67564307	67564506	intron (NM_008088, intron 1 of 13)	-22094	Gas7	3.71287	6.0235e-07	0.000104818	4.77059	1.19149e-10	9.26326e-08	4.2929	5.75774e-09	2.27487e-06	-1.40744	0.0187299	0.0709038	0.175364	0.758821	0.861642	1.49515	0	37.6267	32.7515	33.5679	124.944	34.0998	74.3839	27.2597	27.0769	61.876	63.0259	1	0	1	0	1	0	0	0
chr4	43834913	43835112	3' UTR (NM_019475, exon 1 of 1)	1505	Olfr157	3.8754	2.8553e-11	2.8088e-08	4.58621	3.16152e-15	9.39868e-12	4.17807	5.39002e-13	8.11906e-10	-1.7221	0.000460416	0.00357317	-0.942665	0.0484702	0.131864	6.72817	1.69136	79.0161	124.767	110.876	229.064	139.879	111.211	65.4234	29.011	59.401	65.9671	1	0	1	0	1	0	0	1
chr5	103442267	103442466	intron (NM_011204, intron 1 of 47)	17174	Ptpn13	4.91632	1.79976e-13	3.47008e-10	4.57191	1.04123e-11	1.22414e-08	4.32812	8.66597e-11	6.96196e-08	1.29027	0.00707527	0.0328209	1.08387	0.0217109	0.0694717	0	3.38272	69.923	124.767	84.4284	64.0738	77.9423	47.4015	260.331	119.912	118.802	154.203	1	0	1	0	1	0	0	0
chr8	104886575	104886774	Intergenic	19250	Ces2d-ps	4.47353	6.06361e-14	1.38532e-10	4.56767	2.17953e-14	5.25287e-11	4.65732	4.12622e-15	1.32595e-11	0.543776	0.227173	0.442147	0.436403	0.323795	0.515203	0.747575	6.76544	106.295	116.97	129.186	108.925	116.913	137.1	254.879	96.7032	150.977	195.8	1	0	1	0	1	0	0	0
chr10	88405873	88406072	intron (NM_001004164, intron 2 of 20)	26560	Gnptab	4.54561	4.72693e-18	5.69618e-14	4.55479	5.10546e-18	4.92187e-14	4.5617	2.8386e-18	2.28044e-14	0.557013	0.183175	0.384472	0.322085	0.436827	0.622183	4.48545	8.4568	207.26	185.592	169.874	227.462	172.587	224.975	415.711	174.066	195.528	302.104	1	0	1	0	1	0	0	0
chr4	32126944	32127143	Intergenic	162936	Map3k7	3.84247	3.99419e-15	1.48098e-11	4.50992	2.74312e-20	6.6112e-16	4.29665	9.89028e-19	9.53463e-15	0.0770655	0.847519	0.929333	0.470868	0.234427	0.416177	8.9709	8.4568	152.388	168.436	183.098	336.387	202.511	240.654	366.644	177.934	279.68	340.34	1	0	1	0	1	0	0	0
chr9	69314497	69314696	intron (NM_001289916, intron 1 of 9)	24755	Rora	4.50132	9.91188e-17	7.96287e-13	4.50799	1.1862e-16	7.14717e-13	4.65954	5.797e-18	3.99181e-14	-0.65543	0.114932	0.278179	-0.458368	0.254536	0.439881	2.9903	6.76544	167.752	115.41	115.962	172.999	135.703	183.772	99.4981	79.2966	96.5266	130.674	1	0	1	0	1	0	0	0
chr8	128549809	128550008	Intergenic	-135746	Itgb1	4.22177	2.70034e-17	2.60323e-13	4.50473	2.06967e-19	2.49405e-15	4.48825	1.58432e-19	3.25593e-15	-0.951539	0.0170677	0.0660057	-0.686392	0.0774362	0.188752	6.72817	6.76544	153.329	176.234	175.977	227.462	232.435	165.541	117.217	85.0988	86.6264	150.002	1	0	1	0	1	0	0	0
chr13	115097082	115097281	intron (NM_001033228, intron 1 of 28)	4783	Itga1	4.41951	3.43006e-09	1.57463e-06	4.47428	2.61706e-09	1.23674e-06	5.13297	4.63774e-12	4.96774e-09	-0.347747	0.536969	0.735688	-0.974397	0.0724233	0.179419	0.747575	0	37.6267	59.2645	60.0153	38.4443	59.8486	100.272	55.8825	19.3406	44.5507	35.2945	1	0	1	0	1	0	0	0
chr5	105839945	105840144	Intergenic	-36524	Zfp326	3.52773	2.32867e-08	7.54786e-06	4.45444	1.46662e-12	2.07924e-09	4.71063	4.50757e-14	8.35668e-11	0.00987592	0.984162	0.993644	-0.1662	0.733405	0.845859	4.48545	0	49.8554	60.8241	68.153	150.573	80.726	179.397	130.847	87.0329	96.5266	132.775	1	0	1	0	1	0	0	0
chr2	73346431	73346630	intron (NM_001276443, intron 16 of 16)	33878	Scrn3	4.49842	1.79637e-08	6.22808e-06	4.34759	6.68187e-08	1.80944e-05	4.57134	8.77666e-09	3.11068e-06	0.220347	0.709287	0.851025	-0.408909	0.476933	0.656774	0	0	25.0845	51.4666	25.4302	41.648	35.4916	42.2967	50.4305	27.0769	34.6506	24.7902	1	0	1	0	1	0	0	0
chr14	20173960	20174159	intron (NM_021542, intron 1 of 4)	7723	Kcnk5	3.85023	4.36612e-09	1.91323e-06	4.34064	3.83386e-11	3.55384e-08	3.96375	1.1488e-09	6.08513e-07	0.909569	0.0523015	0.156356	1.37718	0.00262247	0.0116991	1.49515	1.69136	41.7029	54.5858	41.7056	96.1107	43.1466	59.4342	154.018	108.308	118.802	159.245	1	0	1	0	1	0	0	0
chr2	32917627	32917826	intron (NM_146119, intron 5 of 13)	41592	Fam129b	3.80875	4.04838e-09	1.80685e-06	4.33034	2.27672e-11	2.37352e-08	3.85603	2.16414e-09	1.04316e-06	-0.484857	0.364798	0.591654	1.12769	0.030222	0.0906121	3.73787	1.69136	56.4401	87.3372	47.8088	163.388	56.369	90.0629	44.9786	102.505	170.778	167.649	1	0	1	0	1	0	0	0
chr17	33563779	33563978	intron (NM_053214, intron 1 of 27)	8171	Myo1f	3.31176	3.96635e-06	0.000456292	4.30806	1.69516e-09	8.33775e-07	2.99055	2.89087e-05	0.00197934	-0.721454	0.233038	0.449712	1.84237	0.00184763	0.00861942	2.24272	1.69136	32.6098	46.7878	30.5163	137.759	36.8834	24.7946	29.9857	67.6922	76.7263	165.548	1	0	1	0	1	0	0	0
chr18	39282254	39282453	intron (NM_175164, intron 17 of 22)	204892	Nr3c1	3.69216	1.05995e-11	1.18818e-08	4.30575	2.13919e-15	7.36522e-12	3.92049	3.72638e-13	5.79416e-10	0.219709	0.613325	0.790797	0.645132	0.132657	0.279228	5.9806	5.07408	76.1941	126.327	107.824	205.036	102.299	132.36	237.16	125.714	183.153	191.599	1	0	1	0	1	0	0	0
chr17	44557366	44557565	intron (NR_073425, intron 5 of 5)	178711	Runx2	3.9003	5.57506e-09	2.37813e-06	4.29956	1.38518e-10	1.04326e-07	4.07892	8.65865e-10	4.91017e-07	-1.46771	0.00860982	0.0384625	-0.873631	0.103717	0.234415	3.73787	0	63.0247	60.8241	49.8433	118.537	50.1058	90.4275	21.8078	34.8132	29.7005	42.4374	1	0	1	0	1	0	0	0
chr19	17264928	17265127	Intergenic	74478	Gcnt1	5.74449	1.0676e-15	4.67824e-12	4.26048	5.64857e-09	2.34718e-06	3.73793	2.34151e-07	4.46109e-05	2.70253	5.32836e-10	4.33847e-08	3.31931	1.88011e-15	2.05966e-13	0	0	106.295	88.8968	33.5679	33.6387	20.1815	25.5239	295.768	174.066	205.428	294.121	1	0	1	0	1	0	1	0
chr15	53492143	53492342	intron (NM_177225, intron 4 of 4)	-146059	Ext1	3.86098	1.43705e-11	1.53931e-08	4.24674	1.1844e-13	2.37878e-10	4.31591	2.86273e-14	6.17382e-11	0.689891	0.122812	0.2917	-0.128962	0.771364	0.86984	3.73787	5.07408	75.8805	107.612	113.927	126.546	110.65	141.111	288.953	104.439	111.377	118.069	1	0	1	0	1	0	0	0
chr12	104057087	104057286	Intergenic	-12743	Serpina12	3.8919	7.34816e-14	1.53998e-10	4.24151	3.75397e-16	1.64499e-12	3.92969	3.46806e-14	6.96531e-11	-0.60955	0.180665	0.380795	-0.480331	0.288206	0.477851	15.6991	1.69136	205.693	173.115	202.425	288.332	196.248	193.982	208.537	104.439	89.1015	180.254	1	0	1	0	1	0	0	0
chr7	123218338	123218537	intron (NM_146198, intron 1 of 16)	3571	Slc5a11	2.91083	0.00126825	0.0307505	4.20444	2.70139e-06	0.000379627	3.5123	8.19484e-05	0.00441366	-4.31455	3.52762e-06	6.44573e-05	-2.55304	0.00211652	0.00970975	0.747575	0	8.46601	17.1555	20.3442	48.0554	19.4856	19.3252	0	0	2.47504	2.10086	0	0	1	0	0	0	0	1
chr1	20743886	20744085	Intergenic	13080	Il17a	4.55012	1.03644e-18	2.49792e-14	4.1793	7.41319e-16	2.7487e-12	3.8261	1.09928e-13	1.89242e-10	-1.36087	0.00180914	0.0109196	-3.05828	9.56263e-11	3.02254e-09	4.48545	11.8395	201.616	237.058	165.805	169.796	161.452	99.1786	70.8753	54.1538	19.8003	10.9245	1	0	1	0	1	0	0	0
chr12	104209902	104210101	Intergenic	-4543	Serpina3f	3.49513	9.17869e-08	2.29239e-05	4.1734	1.6923e-10	1.19959e-07	3.83442	3.42911e-09	1.50264e-06	-1.42556	0.00940281	0.0412631	-0.555694	0.290255	0.480227	4.48545	0	56.1265	45.2282	54.9293	115.333	56.369	74.3839	31.3487	27.0769	27.2254	55.883	1	0	1	0	1	0	0	0
chr13	45649263	45649462	intron (NM_001199304, intron 5 of 6)	141918	Gmpr	3.27915	7.22512e-08	1.89274e-05	4.12214	1.11574e-11	1.25072e-08	3.74046	5.47853e-10	3.34273e-07	-0.219223	0.654202	0.818262	1.74189	0.000221255	0.00133462	3.73787	3.38272	50.4825	56.1454	51.8777	147.37	49.4099	98.4493	68.1494	100.571	262.354	267.65	1	0	1	0	1	0	0	0
chr10	88420764	88420963	intron (NM_001004164, intron 7 of 20)	-38724	Sycp3	3.7017	1.21442e-12	1.82929e-09	4.12005	2.87154e-15	9.22761e-12	3.93307	2.94589e-14	6.17382e-11	0.137916	0.735991	0.866881	-0.197919	0.625374	0.773327	4.48545	8.4568	99.7108	104.493	142.409	132.953	112.738	127.619	201.722	100.571	89.1015	116.808	1	0	1	0	1	0	0	0
chr8	86856347	86856546	intron (NM_030563, intron 2 of 6)	28812	N4bp1	4.48815	6.03053e-15	1.81677e-11	4.11688	1.27461e-12	1.91996e-09	4.47317	5.76362e-15	1.73636e-11	1.4516	0.000619074	0.0045468	0.750042	0.0700181	0.174817	2.9903	3.38272	115.075	115.41	73.2391	104.12	73.7668	152.779	299.857	201.143	170.778	218.07	1	0	1	0	1	0	0	0
chr19	29271310	29271509	exon (NM_008413, exon 4 of 25)	19606	Jak2	3.91436	5.28683e-14	1.27418e-10	4.11085	3.31475e-15	9.39868e-12	4.1467	1.07411e-15	3.98265e-12	0.00417812	0.991985	0.996987	0.859634	0.0329345	0.0970895	3.73787	10.1482	114.761	134.125	107.824	179.407	141.27	151.32	100.861	187.604	232.654	307.566	1	0	1	0	1	0	0	0
chr8	86838815	86839014	Intergenic	46344	N4bp1	3.52205	8.52066e-08	2.17308e-05	4.10442	4.27852e-10	2.57924e-07	3.95208	1.39149e-09	7.06029e-07	-1.58907	0.00518933	0.0255868	-0.6807	0.208958	0.384375	2.9903	3.38272	64.9061	48.3474	46.7916	131.351	59.8486	96.6262	35.4377	17.4066	34.6506	57.5637	1	0	1	0	1	0	0	1
chr16	49970076	49970275	Intergenic	-10285	Gm6936	3.58253	2.44754e-10	1.76084e-07	4.0903	5.00916e-13	8.94265e-10	4.32119	1.31728e-14	3.17477e-11	0.986607	0.0291637	0.100011	0.611395	0.169513	0.332352	6.72817	1.69136	68.3552	99.814	71.2046	171.397	124.569	158.977	316.213	174.066	198.003	242.86	1	0	1	0	1	0	0	0
chr18	12640517	12640716	Intergenic	-2917	Ttc39c	3.93962	1.04202e-09	5.76545e-07	4.05838	3.78548e-10	2.40089e-07	4.09871	1.71883e-10	1.2184e-07	1.05162	0.0405642	0.129044	1.27914	0.0109746	0.0395038	2.9903	1.69136	77.7619	62.3837	46.7916	108.925	40.363	117.045	211.263	121.846	165.828	237.818	1	0	1	0	1	0	0	0
chr2	102956978	102957177	Intergenic	-55412	Cd44	4.44149	5.94719e-15	1.81677e-11	4.04512	1.86443e-12	2.54312e-09	4.04474	1.0447e-12	1.33566e-09	1.11139	0.00856457	0.0382887	1.18713	0.00391156	0.016439	5.23302	0	122.6	107.612	97.6521	75.2867	109.258	65.2682	233.071	152.791	170.778	234.036	1	0	1	0	1	0	0	0
chr13	45917304	45917503	intron (NM_001199304, intron 2 of 6)	47588	Atxn1	3.82205	3.84461e-13	6.86362e-10	4.04071	1.90447e-14	4.83154e-11	3.76406	6.91431e-13	9.79664e-10	-0.902844	0.0425013	0.133671	0.414835	0.333236	0.524632	5.23302	10.1482	121.346	141.923	99.6865	209.842	126.656	124.702	91.3201	67.6922	121.277	212.607	1	0	1	0	1	0	0	0
chr6	100824677	100824876	Intergenic	-8862	Ppp4r2	3.18695	8.786e-09	3.55885e-06	4.03783	2.62225e-13	5.05591e-10	4.13427	4.06863e-14	7.84464e-11	-0.432361	0.334108	0.561158	-0.0641472	0.882365	0.935753	4.48545	6.76544	69.6094	59.2645	103.755	137.759	93.2524	163.353	114.491	59.956	106.427	137.396	1	0	1	0	1	0	0	0
chr11	83535110	83535309	Intergenic	-4691	Ccl5	3.26707	6.81038e-06	0.000660511	4.03116	2.66888e-08	9.21555e-06	3.37075	3.0326e-06	0.000346392	-2.00822	0.00245814	0.0140184	0.585225	0.349632	0.541026	4.48545	0	46.7198	45.2282	33.5679	132.953	34.0998	64.9036	6.81494	29.011	51.9759	100.841	1	0	1	0	1	0	0	1
chr2	79065442	79065641	Intergenic	-189885	Itga4	2.83831	0.000424446	0.0150214	4.02442	4.80638e-07	9.61316e-05	3.29214	3.49722e-05	0.00231239	-2.61923	0.000455549	0.00354453	-1.57178	0.0254379	0.0790255	0	3.38272	13.1694	24.9535	35.6023	56.0646	18.0938	33.1811	5.45195	5.80219	7.42512	7.56311	0	0	1	0	0	0	0	1
chr13	45867396	45867595	intron (NM_001199304, intron 2 of 6)	97496	Atxn1	3.48404	1.35711e-06	0.00020093	4.02074	2.48814e-08	8.73203e-06	4.18145	4.74427e-09	1.98855e-06	0.348746	0.550531	0.745455	1.1994	0.0339348	0.0994483	2.24272	0	34.1776	40.5494	23.3958	89.7033	31.3161	92.9799	74.9643	69.6263	111.377	192.439	1	0	1	0	1	0	0	0
chr11	33700808	33701007	intron (NM_001190885, intron 1 of 8)	-121950	Gabrp	2.94196	6.11871e-10	3.71791e-07	4.01522	2.24798e-17	1.80595e-13	3.78757	9.06924e-16	3.64296e-12	-1.13547	0.00724101	0.0334033	-0.0290078	0.943958	0.97008	20.9321	5.07408	129.185	129.446	202.425	360.415	227.564	247.946	130.847	116.044	165.828	294.121	1	0	1	0	1	0	0	0
chr10	51480449	51480648	promoter-TSS (NM_008147)	-64	Lilr4b	3.21648	2.45157e-07	4.96545e-05	4.01511	1.04841e-10	8.56533e-08	4.27029	3.94854e-12	4.367e-09	-0.127023	0.802422	0.905304	-0.687016	0.169252	0.332124	3.73787	3.38272	45.4656	56.1454	67.1358	115.333	82.8137	134.547	122.669	40.6153	61.876	69.3285	1	0	1	0	1	0	0	0
chr6	122527706	122527905	intron (NM_001347434, intron 8 of 8)	14129	Mfap5	4.52308	1.50307e-16	1.03501e-12	4.00507	4.10222e-13	7.6052e-10	4.22057	1.15159e-14	2.92151e-11	1.96243	5.59125e-06	9.44984e-05	0.996468	0.0193952	0.0633521	6.72817	1.69136	165.871	165.317	107.824	120.138	117.609	148.039	685.583	251.428	225.229	318.071	1	0	1	0	1	0	1	0
chr12	104061937	104062136	Intergenic	-15923	Serpina4-ps1	3.49752	3.8177e-11	3.47209e-08	3.98493	5.08625e-14	1.1144e-10	4.08342	7.54051e-15	2.07713e-11	-0.0646491	0.885195	0.947767	-0.264579	0.549242	0.715329	9.71847	5.07408	102.846	127.887	146.478	181.009	144.75	205.285	220.804	88.967	103.952	180.674	1	0	1	0	1	0	0	0
chrX	163995405	163995604	intron (NM_181315, intron 3 of 7)	32506	Car5b	3.313	1.93112e-07	4.13705e-05	3.96555	4.44563e-10	2.61327e-07	3.59504	1.28283e-08	4.12235e-06	-0.507485	0.352772	0.579876	-0.475325	0.38054	0.57107	5.9806	1.69136	63.6519	62.3837	52.8949	153.777	62.6322	92.2506	91.3201	48.3516	32.1755	72.6899	1	0	1	0	1	0	0	0
chr5	96197608	96197807	Intergenic	-12408	Mrpl1	3.20565	4.02824e-05	0.00257024	3.9621	3.6735e-07	7.69869e-05	3.56188	3.8858e-06	0.000410753	1.17475	0.0467882	0.143575	1.21949	0.0354993	0.103081	0.747575	0	18.8134	18.7151	21.3614	46.4535	14.6142	33.9103	98.1351	61.8901	37.1256	81.9337	0	0	1	0	0	0	0	0
chr1	92806835	92807034	Intergenic	-24752	Gpc1	2.57981	9.55592e-05	0.00494221	3.94835	1.68956e-09	8.33775e-07	3.43191	1.40294e-07	2.96599e-05	-0.626328	0.267959	0.490195	0.278046	0.61585	0.76603	5.23302	1.69136	32.9234	34.3111	60.0153	128.148	52.1935	74.3839	88.5942	27.0769	47.0258	105.043	1	0	1	0	1	0	0	0
chr6	51060124	51060323	Intergenic	209687	Mir148a	2.37723	3.24647e-05	0.00220509	3.94632	3.58034e-12	4.31449e-09	3.71976	4.69516e-11	4.11484e-08	-1.45473	0.00551066	0.0268376	-0.571526	0.266096	0.453196	16.4466	3.38272	65.2196	73.3009	143.427	297.943	161.452	210.025	117.217	30.945	99.0016	142.859	1	0	1	0	1	0	0	0
chr7	43438779	43438978	TTS (NM_024253)	1740	Nkg7	3.13092	2.28232e-07	4.7528e-05	3.94053	6.60207e-11	5.8932e-08	3.80751	2.09262e-10	1.44098e-07	-1.97588	0.000277933	0.00235447	-1.66686	0.00150069	0.00718265	6.72817	3.38272	63.3383	63.9433	56.9637	176.203	92.5565	115.951	24.5338	29.011	22.2754	36.1348	1	0	1	0	1	0	0	1
chr10	118435615	118435814	Intergenic	-5332	Ifng	3.36171	8.54991e-10	4.90622e-07	3.93577	6.94567e-13	1.11598e-09	3.55779	5.58287e-11	4.63975e-08	-0.0702324	0.865473	0.937981	0.831392	0.036793	0.106032	2.9903	6.76544	63.3383	57.705	79.3423	105.722	61.9363	77.6656	84.5052	90.901	116.327	136.556	1	0	1	0	1	0	0	0
chr17	35231191	35231390	intron (NM_010909, intron 2 of 3)	-3720	Atp6v1g2	3.33527	3.52662e-09	1.60368e-06	3.93321	3.23225e-12	4.10002e-09	2.5621	5.71541e-06	0.000545533	-1.21366	0.0177242	0.0679018	1.63523	0.00108479	0.00541575	11.2136	6.76544	111.312	132.565	80.3595	299.545	68.1995	69.2791	58.6084	96.7032	155.928	297.062	1	0	1	0	1	0	0	0
chr3	96882115	96882314	intron (NM_026229, intron 8 of 13)	23084	Gpr89	3.13083	2.34332e-07	4.8065e-05	3.91866	8.82924e-11	7.33771e-08	3.40952	1.39664e-08	4.40004e-06	0.539205	0.290391	0.515845	1.61088	0.00134607	0.00654133	5.9806	3.38272	42.9572	84.218	51.8777	172.999	61.9363	90.4275	219.441	110.242	247.504	252.104	1	0	1	0	1	0	0	0
chr14	68035355	68035554	Intergenic	-48430	Nefl	3.84038	1.68866e-10	1.29202e-07	3.88067	1.29678e-10	9.92183e-08	3.12293	2.03187e-07	3.98131e-05	0.254849	0.611651	0.789657	0.465696	0.352428	0.543468	7.47575	0	73.3721	121.648	79.3423	120.138	68.1995	45.943	166.284	71.5604	66.8261	91.1775	1	0	1	0	1	0	0	0
chr4	11794463	11794662	intron (NM_019753, intron 9 of 17)	36405	Cdh17	2.53585	4.94035e-06	0.000528015	3.88028	1.89935e-12	2.54312e-09	3.55404	8.99038e-11	7.10417e-08	-3.50566	3.31753e-10	2.96682e-08	-3.20694	1.73623e-09	4.00846e-08	9.71847	10.1482	49.2283	88.8968	106.807	256.295	119.697	163.718	9.54091	17.4066	12.3752	13.4455	1	0	1	0	1	0	0	1
chr5	73194820	73195019	intron (NM_028194, intron 3 of 62)	61699	Fryl	3.28148	3.83813e-08	1.13162e-05	3.87894	7.89363e-11	6.79444e-08	3.59661	1.25021e-09	6.55027e-07	-0.0545983	0.912985	0.960951	0.261697	0.594494	0.749579	3.73787	6.76544	55.813	79.5393	86.4628	121.74	84.9015	83.4996	152.655	44.4835	81.6763	119.749	1	0	1	0	1	0	0	0
chr15	51730846	51731045	Intergenic	134516	Eif3h	3.66026	2.56152e-10	1.81574e-07	3.87203	2.61039e-11	2.51652e-08	3.98793	3.98631e-12	4.367e-09	-0.906995	0.0622017	0.178255	-0.814588	0.0833215	0.199417	6.72817	1.69136	86.5414	82.6584	80.3595	118.537	82.8137	131.266	69.5123	30.945	51.9759	65.1268	1	0	1	0	1	0	0	0
chr7	139151184	139151383	intron (NM_001162540, intron 1 of 11)	37211	Stk32c	3.28336	1.26784e-08	4.70095e-06	3.85551	2.3996e-11	2.4097e-08	3.48707	1.02636e-09	5.6617e-07	-0.141551	0.746805	0.873704	0.681613	0.10441	0.235532	3.73787	3.38272	42.6436	59.2645	74.2563	76.8886	52.8894	62.3512	77.6903	58.0219	99.0016	91.1775	1	0	1	0	1	0	0	0
chr6	50390385	50390584	intron (NM_001347213, intron 2 of 23)	-7647	Osbpl3	3.99779	3.17997e-09	1.48734e-06	3.84055	1.67499e-08	6.35732e-06	4.32784	1.07301e-10	8.20976e-08	1.26044	0.0147806	0.0591405	1.13043	0.0233277	0.0736229	1.49515	1.69136	50.169	60.8241	36.6195	62.472	34.7957	104.283	158.107	88.967	143.552	176.893	1	0	1	0	1	0	0	0
chr9	52070132	52070331	intron (NM_001104616, intron 9 of 13)	-21526	Gm6981	3.31659	1.03499e-08	4.05599e-06	3.83717	3.54748e-11	3.35285e-08	3.80852	3.33015e-11	3.01785e-08	-2.68947	8.87376e-07	2.05049e-05	-3.08884	7.07754e-09	1.39702e-07	7.47575	3.38272	73.0585	77.9797	73.2391	148.972	112.042	103.189	9.54091	21.2747	12.3752	10.0841	1	0	1	0	1	0	0	1
chr19	21863620	21863819	Intergenic	85379	Tmem2	4.0566	9.1496e-12	1.05007e-08	3.83444	1.65423e-10	1.19011e-07	3.53736	2.55322e-09	1.17971e-06	1.10348	0.0148045	0.0592107	1.29417	0.00347064	0.0148532	2.9903	3.38272	80.2703	85.7776	66.1186	75.2867	67.5036	46.6723	220.804	90.901	131.177	157.565	1	0	1	0	1	0	0	0
chr1	40386220	40386419	Intergenic	-43251	Il1rl1	3.46141	6.1281e-06	0.000615389	3.82652	6.35471e-07	0.000117665	3.7607	6.87337e-07	0.00011007	0.916181	0.11196	0.27303	1.81874	0.000929479	0.00472204	0.747575	0	10.6609	38.9898	25.4302	35.2406	23.6611	33.1811	66.7864	52.2197	126.227	96.6397	0	0	1	0	1	0	0	0
chr8	104867202	104867401	promoter-TSS (NR_033726)	-123	Ces2d-ps	3.64527	4.95802e-12	6.45909e-09	3.80538	6.8374e-13	1.11598e-09	3.87067	1.56576e-13	2.60251e-10	0.583062	0.173652	0.370682	0.554843	0.186328	0.354926	5.23302	8.4568	115.075	96.6948	125.117	113.731	123.873	126.526	263.057	98.6373	178.203	194.96	1	0	1	0	1	0	0	0
chr2	5003186	5003385	intron (NM_001305259, intron 8 of 19)	9059	Mcm10	2.8082	0.000683911	0.0202493	3.79236	4.01516e-06	0.000512007	4.11992	3.87331e-07	6.96646e-05	-2.19831	0.00371892	0.0195848	-3.54153	3.2207e-06	3.13245e-05	1.49515	0	20.6947	7.79797	25.4302	40.0461	37.5793	44.4845	5.45195	5.80219	2.47504	2.10086	0	0	1	0	1	0	0	1
chr5	53401153	53401352	Intergenic	134146	Smim20	3.39123	9.14985e-09	3.67534e-06	3.78546	1.56465e-10	1.14272e-07	3.88489	2.9058e-11	2.69357e-08	0.16271	0.725696	0.860538	-0.0357534	0.936841	0.966186	2.9903	5.07408	65.2196	46.7878	82.3939	68.8793	77.2464	85.3227	102.224	67.6922	51.9759	101.262	1	0	1	0	1	0	0	0
chrX	101737233	101737432	Intergenic	-3185	Cxcr3	3.66883	5.71566e-09	2.41672e-06	3.7744	2.36927e-09	1.14204e-06	3.38231	7.15756e-08	1.80633e-05	-0.846351	0.121913	0.290095	0.173886	0.742909	0.851577	3.73787	5.07408	92.499	67.0625	47.8088	128.148	50.8017	78.7594	68.1494	23.2088	69.3011	78.1521	1	0	1	0	1	0	0	0
chrX	101767376	101767575	Intergenic	-33328	Cxcr3	4.06406	3.0031e-11	2.83834e-08	3.74807	1.33297e-09	7.16172e-07	4.13088	1.08027e-11	1.13198e-08	0.692185	0.132957	0.308309	0.901858	0.0395589	0.112404	2.9903	1.69136	82.4652	59.2645	61.0326	52.8609	70.9832	79.4887	125.395	61.8901	113.852	171.851	1	0	1	0	1	0	0	0
chr10	118440766	118440965	promoter-TSS (NM_008337)	-181	Ifng	3.42502	7.18724e-11	5.87185e-08	3.73992	1.31969e-12	1.92763e-09	3.71053	1.04726e-12	1.33566e-09	-0.475407	0.257497	0.478946	0.370316	0.351624	0.542733	2.9903	10.1482	89.677	63.9433	96.6349	99.3144	97.4279	94.0738	69.5123	69.6263	118.802	130.254	1	0	1	0	1	0	0	0
chr5	53402814	53403013	Intergenic	135807	Smim20	3.28558	9.85012e-09	3.89177e-06	3.7316	8.11186e-11	6.85979e-08	3.94919	2.97379e-12	3.58356e-09	1.47155	0.00064437	0.004689	1.2302	0.00326915	0.0141335	2.9903	5.07408	59.8892	45.2282	62.0498	86.4996	79.3342	92.9799	278.049	146.989	163.353	251.263	1	0	1	0	1	0	0	0
chr8	34654802	34655001	Intergenic	-14585	B930018H19Rik	2.77599	1.17757e-05	0.00103015	3.71732	3.73209e-09	1.65041e-06	3.40584	5.09068e-08	1.32638e-05	-1.53225	0.0057005	0.0275263	-0.6371	0.225888	0.405465	4.48545	3.38272	35.4318	42.109	46.7916	108.925	57.7608	64.1744	19.0818	30.945	27.2254	46.219	1	0	1	0	1	0	0	0
chr16	52418584	52418783	intron (NM_009655, intron 1 of 15)	34398	Alcam	3.31956	1.26169e-05	0.00108854	3.70315	1.18176e-06	0.000193753	3.53414	2.72954e-06	0.0003209	1.50665	0.0128554	0.0529304	0.669269	0.264651	0.451612	1.49515	0	21.3218	32.7515	35.6023	35.2406	39.6671	22.9715	181.277	36.7472	42.0757	59.6645	1	0	1	0	1	0	0	0
chr11	98990986	98991185	Intergenic	-8069	Gjd3	2.79733	0.000214358	0.009024	3.67845	1.02887e-06	0.000173404	2.65701	0.00039997	0.0134747	-2.07551	0.00281041	0.0156447	0.0106087	0.98691	0.993963	2.24272	1.69136	26.0251	21.8343	28.4819	67.2775	22.9652	20.4191	4.08896	15.4725	14.8502	26.891	1	0	1	0	1	0	0	1
chr10	118470783	118470982	Intergenic	29836	Ifng	3.14745	1.03407e-06	0.000161832	3.67585	1.22518e-08	4.7245e-06	2.87384	7.19571e-06	0.000654429	0.993156	0.0368312	0.119834	2.21153	1.73663e-06	1.83693e-05	1.49515	3.38272	25.0845	42.109	35.6023	60.8701	29.9243	23.3361	104.95	90.901	150.977	116.388	1	0	1	0	1	0	0	0
chr1	40393354	40393553	Intergenic	-36117	Il1rl1	3.39658	6.86583e-07	0.000116531	3.66243	1.08464e-07	2.70586e-05	3.70896	4.02702e-08	1.09667e-05	1.56225	0.000717518	0.0051299	2.24895	1.6679e-07	2.31422e-06	1.49515	0	28.8471	21.8343	28.4819	35.2406	28.5325	36.4627	94.0461	102.505	143.552	185.296	1	0	1	0	1	0	0	0
chr6	137582283	137582482	intron (NM_001271588, intron 1 of 20)	-11373	Eps8	3.50151	6.26825e-07	0.00010758	3.64836	2.44372e-07	5.4787e-05	3.8216	4.07801e-08	1.10432e-05	1.75991	0.0012872	0.00828051	1.20519	0.0237302	0.0746536	2.24272	0	34.1776	38.9898	36.6195	44.8517	38.2753	53.6002	238.523	58.0219	91.5765	131.514	1	0	1	0	1	0	1	0
chr1	130993770	130993969	Intergenic	-25976	Il10	3.41033	1.54689e-14	3.92437e-11	3.63984	2.67909e-16	1.29137e-12	3.60482	3.52524e-16	1.54476e-12	-0.987822	0.015491	0.0613354	-0.38822	0.332164	0.523629	32.8933	6.76544	300.7	227.701	246.165	381.239	318.728	291.337	152.655	154.725	195.528	262.608	1	0	1	0	1	0	0	0
chr11	17008620	17008819	promoter-TSS (NM_019549)	-1	Plek	3.04315	4.00187e-05	0.00256513	3.63837	9.15177e-07	0.000157548	3.20339	1.23861e-05	0.00102057	1.85266	0.00106137	0.00705368	2.17825	8.19564e-05	0.00055656	1.49515	0	13.4829	31.1919	29.4991	36.8424	16.006	30.9933	192.181	67.6922	96.5266	142.018	0	0	1	0	0	0	1	0
chr6	122270232	122270431	TTS (NM_016970)	12502	Klrg1	3.06992	5.11354e-06	0.00054172	3.6322	6.81115e-08	1.83414e-05	3.32515	6.42123e-07	0.000103718	-1.50237	0.0131565	0.0539236	-1.72865	0.00410201	0.0171384	5.23302	1.69136	40.4487	54.5858	46.7916	97.7126	31.3161	81.3118	29.9857	15.4725	14.8502	15.5464	1	0	1	0	1	0	0	0
chr19	21913905	21914104	Intergenic	135664	Tmem2	3.34578	4.64234e-07	8.31859e-05	3.62081	5.82762e-08	1.63316e-05	2.8681	1.45966e-05	0.00116488	2.04665	2.15442e-05	0.000288385	2.62976	2.5869e-08	4.39681e-07	0.747575	3.38272	35.4318	29.6323	30.5163	51.259	32.012	15.3143	209.9	146.989	131.177	181.935	1	0	1	0	0	0	1	0
chr15	59731288	59731487	Intergenic	63572	Gm19510	4.27128	2.51988e-13	4.67167e-10	3.61697	9.67094e-10	5.42045e-07	3.39513	6.16536e-09	2.41612e-06	0.0370243	0.936326	0.972158	0.735257	0.0975342	0.223948	3.73787	3.38272	73.6857	138.804	56.9637	73.6849	61.2404	49.5893	74.9643	58.0219	84.1514	102.522	1	0	1	0	1	0	0	0
chr6	54956038	54956237	intron (NM_172729, intron 1 of 11)	15524	Nod1	2.71616	0.000141304	0.00661275	3.60887	3.88264e-07	8.03223e-05	3.40398	1.42397e-06	0.000190662	-2.31229	0.000619697	0.00454929	-1.54529	0.0158366	0.0536027	3.73787	3.38272	23.5167	48.3474	36.6195	102.518	59.8486	57.6111	2.72597	21.2747	14.8502	20.1683	1	0	1	0	1	0	0	1
chr5	77091874	77092073	intron (NM_001159900, intron 2 of 2)	3294	Hopx	2.41106	5.78226e-05	0.00341984	3.59505	1.46861e-09	7.69455e-07	3.06379	2.08979e-07	4.06178e-05	-0.407816	0.420685	0.642802	0.148689	0.764841	0.865602	4.48545	6.76544	33.864	40.5494	68.153	108.925	50.8017	67.8206	88.5942	40.6153	44.5507	84.0345	1	0	1	0	1	0	0	0
chr10	17548904	17549103	Intergenic	-174225	Cited2	4.17771	7.4029e-11	5.94725e-08	3.58644	3.44678e-08	1.07188e-05	3.79416	3.02517e-09	1.33779e-06	2.95019	1.81381e-09	1.16417e-07	2.03189	2.07947e-05	0.000164292	2.24272	1.69136	72.4314	74.8605	55.9465	38.4443	44.5385	65.9975	639.241	179.868	217.804	270.591	1	0	1	0	1	0	1	0
chr18	39141740	39141939	intron (NM_175164, intron 10 of 22)	148694	Arhgap26	2.55908	0.000221753	0.00926251	3.5666	2.24225e-07	5.07422e-05	3.15962	3.69502e-06	0.00039852	-1.85036	0.00310723	0.0169832	-2.17967	0.000484487	0.00266529	2.9903	3.38272	23.5167	29.6323	44.7572	67.2775	42.4507	39.3797	12.2669	15.4725	2.47504	10.0841	1	0	1	0	1	0	0	1
chr3	95385812	95386011	TTS (NR_015490)	16930	4930558C23Rik	3.27192	2.35038e-06	0.000307612	3.5588	3.05993e-07	6.64391e-05	3.25252	2.34844e-06	0.000283708	-0.651088	0.279377	0.503704	-0.339756	0.563597	0.725981	1.49515	5.07408	26.9658	65.5029	35.6023	76.8886	33.4039	54.3294	24.5338	44.4835	27.2254	39.4962	1	0	1	0	1	0	0	0
chr5	54105636	54105835	intron (NM_001081103, intron 7 of 11)	107212	Stim2	3.59885	2.53079e-08	7.93205e-06	3.55024	4.6285e-08	1.34399e-05	3.20901	6.31974e-07	0.000102914	1.50809	0.00550278	0.0268168	1.00591	0.0623177	0.159925	3.73787	3.38272	54.2452	87.3372	44.7572	91.3052	45.9303	58.3403	332.569	77.3626	91.5765	127.312	1	0	1	0	1	0	0	0
chr15	62189719	62189918	intron (NR_132746, intron 3 of 6)	29633	H2afy3	2.3296	3.29943e-05	0.00223369	3.53317	1.91158e-10	1.31631e-07	2.64618	1.57536e-06	0.000207474	1.2502	0.00255743	0.0144602	2.88087	9.71839e-13	5.17619e-11	2.9903	6.76544	34.4912	20.2747	52.8949	86.4996	38.9712	33.9103	170.373	168.264	277.205	297.902	1	0	1	0	1	0	0	0
chr18	12634605	12634804	Intergenic	-8829	Ttc39c	2.76743	4.30634e-05	0.00270632	3.532	1.65951e-07	3.90362e-05	3.60053	6.61298e-08	1.67768e-05	-1.28901	0.0295524	0.101063	-1.66823	0.00389362	0.016377	2.9903	3.38272	26.3387	37.4302	36.6195	75.2867	57.0649	58.705	12.2669	30.945	19.8003	14.706	1	0	1	0	1	0	0	0
chr3	107853302	107853501	Intergenic	-23829	Eps8l3	3.15034	6.13994e-08	1.64421e-05	3.53126	1.33719e-09	7.16172e-07	3.15846	4.94711e-08	1.29598e-05	-1.47728	0.00610727	0.0291122	-1.00787	0.056656	0.148655	14.2039	1.69136	116.329	85.7776	91.5488	179.407	101.603	102.825	65.4234	23.2088	34.6506	59.2443	1	0	1	0	1	0	0	0
chr11	86595478	86595677	intron (NM_029478, intron 10 of 11)	-11419	Mir21a	3.6849	1.73182e-06	0.000244801	3.53069	5.54166e-06	0.00065151	3.58158	2.98193e-06	0.000342226	0.155812	0.80871	0.90893	0.925742	0.132515	0.279028	1.49515	0	32.2963	37.4302	22.3786	40.0461	25.7488	37.9212	9.54091	61.8901	61.876	67.2276	1	0	1	0	1	0	0	0
chr11	86652743	86652942	intron (NM_029478, intron 5 of 11)	-3229	Mir8115	3.6804	2.38496e-07	4.87119e-05	3.51522	1.0056e-06	0.000170077	3.80351	7.6806e-08	1.89857e-05	0.188925	0.747267	0.873996	1.31585	0.0176014	0.0585562	1.49515	1.69136	25.398	63.9433	27.4646	49.6572	42.4507	51.777	21.8078	67.6922	94.0516	154.624	1	0	1	0	1	0	0	0
chr18	12643652	12643851	5' UTR (NM_028341, exon 1 of 14)	218	Ttc39c	3.53585	1.47541e-14	3.92437e-11	3.51349	2.91776e-14	6.69723e-11	3.09805	1.44119e-11	1.47804e-08	-0.33915	0.394529	0.618884	0.143589	0.713582	0.832674	14.2039	10.1482	195.972	145.042	154.616	184.212	146.142	105.377	170.373	92.8351	133.652	143.699	1	0	1	0	1	0	0	0
chr4	62679242	62679441	intron (NM_001310706, intron 1 of 6)	5367	Rgs3	3.26708	3.14516e-07	6.11302e-05	3.49945	5.10278e-08	1.45063e-05	4.05151	1.28871e-10	9.70599e-08	1.3893	0.00461676	0.0233243	1.31061	0.00516891	0.0208827	3.73787	0	36.0589	43.6686	52.8949	40.0461	57.0649	82.4057	171.736	85.0988	121.277	236.977	1	0	1	0	1	0	0	0
chr1	161693290	161693489	Intergenic	95106	Fasl	2.59015	0.000777089	0.0220726	3.49686	5.13663e-06	0.000616547	3.81132	4.08294e-07	7.1539e-05	-0.690688	0.275115	0.498593	0.357392	0.532239	0.701602	1.49515	0	13.1694	14.0363	22.3786	32.0369	26.4447	40.8382	16.3558	15.4725	34.6506	52.1014	0	0	1	0	1	0	0	0
chr12	101053545	101053744	intron (NM_211355, intron 6 of 14)	-24661	Ccdc88c	2.38718	0.0036096	0.0625864	3.49397	1.82405e-05	0.00160151	2.85424	0.000433393	0.0142146	-1.98539	0.0101555	0.0438204	-1.87811	0.0145038	0.0498226	2.24272	1.69136	12.8558	24.9535	21.3614	67.2775	30.6202	22.2422	1.36299	17.4066	7.42512	4.6219	0	0	1	0	1	0	0	1
chr1	138287771	138287970	exon (NM_177397, exon 3 of 3)	14132	Atp6v1g3	3.33757	6.5296e-06	0.000642326	3.4908	2.80333e-06	0.000390538	3.75865	2.87097e-07	5.32256e-05	0.327844	0.582869	0.768576	0.15786	0.782832	0.877352	0	3.38272	19.1269	38.9898	36.6195	25.6295	36.1875	40.109	27.2597	54.1538	54.4509	34.4542	0	0	1	0	1	0	0	0
chr4	32179856	32180055	Intergenic	215848	Map3k7	2.801	3.43532e-06	0.000411322	3.48915	6.97964e-09	2.8036e-06	3.4396	6.9278e-09	2.6294e-06	1.3785	0.00301896	0.0165778	1.60574	0.000361622	0.00205626	4.48545	1.69136	34.8047	35.8706	45.7744	72.083	38.2753	73.29	179.914	137.319	131.177	224.792	1	0	1	0	1	0	0	0
chr17	64617747	64617946	intron (NM_008549, intron 1 of 21)	16197	Man2a1	2.55978	6.30109e-05	0.00363196	3.48872	4.27957e-08	1.26026e-05	3.15211	5.97268e-07	9.92742e-05	-1.89878	0.00123453	0.00801117	-1.97746	0.000629756	0.00336424	3.73787	6.76544	32.9234	43.6686	56.9637	94.5089	53.5854	63.0805	27.2597	7.73626	17.3253	10.9245	1	0	1	0	1	0	0	1
chr2	122666560	122666759	Intergenic	25856	Mir147	2.92612	6.07475e-08	1.63584e-05	3.48304	1.12454e-10	9.03415e-08	3.11143	6.83851e-09	2.61895e-06	-1.94088	0.000135468	0.00130232	-1.237	0.0120628	0.0427756	17.1942	3.38272	95.9481	113.85	105.79	209.842	83.5096	154.602	31.3487	44.4835	47.0258	49.1602	1	0	1	0	1	0	0	1
chr12	4065578	4065777	Intergenic	-16897	Dnajc27	2.15291	0.000279625	0.0110118	3.47772	3.1294e-09	1.42616e-06	3.34911	8.89493e-09	3.12959e-06	-3.17822	1.08521e-07	3.58849e-06	-2.5486	3.84085e-06	3.66825e-05	4.48545	13.5309	29.4743	59.2645	89.5144	139.361	82.1178	123.973	12.2669	7.73626	12.3752	17.2271	1	0	1	0	1	0	0	1
chr1	52035484	52035683	intron (NM_001308266, intron 4 of 24)	27343	Stat4	1.93348	0.00531449	0.0802488	3.47126	3.66842e-07	7.69869e-05	2.57898	0.000146546	0.00664856	-1.34097	0.027021	0.0944022	0.301374	0.601075	0.754427	5.23302	0	16.932	17.1555	47.8088	60.8701	19.4856	35.3688	14.9929	25.1428	37.1256	33.1936	0	0	1	0	0	0	0	0
chr4	43823017	43823216	Intergenic	-1683	Olfr156	3.23813	8.03215e-10	4.66465e-07	3.46978	5.24578e-11	4.77089e-08	3.14409	2.02508e-09	9.85991e-07	0.208524	0.646221	0.813294	0.775528	0.0820357	0.197233	6.72817	11.8395	90.6177	116.97	79.3423	166.592	103.691	88.969	174.462	108.308	116.327	215.969	1	0	1	0	1	0	0	0
chr6	47560991	47561190	intron (NM_001146689, intron 3 of 19)	33940	Ezh2	3.70493	5.33918e-08	1.47062e-05	3.45701	5.03729e-07	9.9105e-05	3.24337	1.8029e-06	0.000229297	0.267233	0.632712	0.804336	0.84289	0.118162	0.257536	1.49515	3.38272	34.8047	70.1817	34.5851	51.259	37.5793	35.0042	73.6013	29.011	51.9759	81.0933	1	0	1	0	1	0	0	0
chr18	67882814	67883013	intron (NM_027556, intron 45 of 45)	-50344	Ldlrad4	2.3227	0.000695907	0.0205792	3.45674	3.70565e-07	7.73245e-05	2.60563	0.000118963	0.00574228	-1.95751	0.00209605	0.0123047	-0.480058	0.428153	0.614441	3.73787	5.07408	31.9827	24.9535	28.4819	108.925	31.3161	39.7443	14.9929	15.4725	29.7005	21.4288	1	0	1	0	1	0	0	1
chr10	39470254	39470453	intron (NM_001122893, intron 3 of 13)	100554	Fyn	3.20002	2.29532e-07	4.7528e-05	3.44999	2.85881e-08	9.50346e-06	3.54011	7.28731e-09	2.72297e-06	-0.436472	0.390844	0.615307	-0.27024	0.577002	0.73637	1.49515	6.76544	50.4825	38.9898	45.7744	64.0738	57.7608	58.3403	42.2526	36.7472	56.9259	41.1769	1	0	1	0	1	0	0	0
chr18	80684520	80684719	intron (NM_198429, intron 2 of 9)	23554	Nfatc1	3.56556	1.43864e-12	2.10138e-09	3.44066	1.11136e-11	1.25072e-08	3.57099	1.05297e-12	1.33566e-09	-0.902196	0.0437082	0.136541	-0.994599	0.0225744	0.0716583	13.4563	5.07408	170.888	118.529	92.566	176.203	125.96	166.27	76.3273	61.8901	61.876	78.5723	1	0	1	0	1	0	0	0
chr15	99643973	99644172	intron (NM_012025, intron 1 of 17)	7584	Racgap1	3.0949	0.000227942	0.00947177	3.41223	5.03013e-05	0.00333076	2.77738	0.000901099	0.024037	-1.49023	0.0566189	0.165907	-0.879772	0.249647	0.434575	0	3.38272	9.72023	43.6686	24.413	41.648	25.0529	14.5851	8.17792	11.6044	4.95008	12.6052	0	0	1	0	0	0	0	0
chr6	39283833	39284032	Intergenic	-77159	Kdm7a	2.29081	0.00205325	0.0428259	3.3929	4.26546e-06	0.000531276	2.58192	0.000437021	0.0142525	-0.735133	0.263251	0.484715	0.242544	0.70638	0.8282	2.24272	3.38272	9.40668	34.3111	24.413	72.083	20.8774	29.8994	27.2597	27.0769	32.1755	29.8323	0	0	1	0	1	0	0	0
chr11	86593129	86593328	intron (NM_029478, intron 10 of 11)	-9070	Mir21a	3.46055	8.83799e-13	1.37422e-09	3.39019	3.47441e-12	4.29419e-09	2.96689	8.16437e-10	4.68499e-07	-0.0760712	0.854341	0.932899	1.31475	0.00103552	0.00519887	8.9709	11.8395	128.558	140.363	99.6865	156.981	102.299	86.052	83.1422	160.527	202.953	277.314	1	0	1	0	1	0	0	0
chr14	20168567	20168766	intron (NM_021542, intron 1 of 4)	13116	Kcnk5	2.06839	0.00332378	0.0590995	3.38584	1.16952e-06	0.0001924	2.87302	3.22065e-05	0.00215056	-1.59103	0.012513	0.0518438	-0.576881	0.341444	0.53263	4.48545	1.69136	18.1862	21.8343	25.4302	83.296	34.0998	38.2858	16.3558	15.4725	24.7504	22.6893	0	0	1	0	1	0	0	0
chr16	27349392	27349591	intron (NM_198112, intron 4 of 4)	20748	Uts2b	2.50197	4.10967e-05	0.00260308	3.35367	3.53672e-08	1.08584e-05	3.58144	3.01321e-09	1.33779e-06	0.750863	0.173447	0.370402	-0.426981	0.437704	0.623156	1.49515	18.605	71.4908	54.5858	143.427	96.1107	146.838	137.464	327.117	90.901	89.1015	116.388	1	0	1	0	1	0	0	0
chr19	18599133	18599332	intron (NM_017375, intron 2 of 9)	32581	Ostf1	3.49496	1.81697e-08	6.22808e-06	3.35235	8.98406e-08	2.28371e-05	3.69586	1.9869e-09	9.7727e-07	1.32629	0.00737457	0.0338962	1.07836	0.0240051	0.0753217	2.9903	3.38272	60.5163	49.907	28.4819	73.6849	48.018	80.2179	139.025	125.714	99.0016	179.834	1	0	1	0	1	0	0	0
chr9	13701895	13702094	intron (NM_001013813, intron 2 of 3)	39534	Maml2	3.2034	1.75309e-09	8.98964e-07	3.34298	4.28072e-10	2.57924e-07	3.14811	2.57757e-09	1.17971e-06	-0.0214588	0.961015	0.983771	0.649181	0.123554	0.265909	5.9806	6.76544	52.3638	98.2544	67.1358	96.1107	73.7668	67.0914	85.8682	73.4944	108.902	115.547	1	0	1	0	1	0	0	0
chr10	82780392	82780591	Intergenic	-16350	Nfyb	2.4413	2.90339e-05	0.00201656	3.34072	8.92355e-09	3.46882e-06	3.20575	2.31402e-08	6.88521e-06	0.727497	0.127698	0.299882	1.15115	0.0132014	0.0461067	5.23302	5.07408	21.6354	56.1454	61.0326	81.6941	72.375	56.5172	151.292	88.967	146.027	151.262	1	0	1	0	1	0	0	0
chr17	80167950	80168149	intron (NM_176963, intron 4 of 6)	39256	Srsf7	3.45047	6.17055e-10	3.71791e-07	3.32992	3.38186e-09	1.52348e-06	3.54511	1.52522e-10	1.11392e-07	1.51841	0.000561388	0.00419926	1.22729	0.00398604	0.0167176	4.48545	5.07408	74.6263	67.0625	55.9465	75.2867	72.375	79.8533	267.145	121.846	146.027	219.75	1	0	1	0	1	0	0	0
chr1	131003410	131003609	Intergenic	-16336	Il10	3.31759	1.29476e-08	4.76414e-06	3.32516	1.54283e-08	5.90217e-06	3.18461	4.00175e-08	1.09598e-05	-0.181587	0.709964	0.851349	0.532471	0.253967	0.439228	4.48545	5.07408	75.567	49.907	56.9637	72.083	68.8955	47.4015	36.8007	77.3626	84.1514	86.5556	1	0	1	0	1	0	0	0
chr6	100807286	100807485	Intergenic	-26253	Ppp4r2	3.07014	2.7019e-07	5.35954e-05	3.31976	3.33648e-08	1.04432e-05	3.46699	3.97144e-09	1.69408e-06	2.03654	4.14463e-06	7.37739e-05	1.93725	4.69256e-06	4.39035e-05	3.73787	1.69136	41.7029	34.3111	41.7056	51.259	35.4916	66.3621	246.701	154.725	215.329	202.103	1	0	1	0	1	0	1	0
chr1	39986934	39987133	intron (NM_001252200, intron 10 of 31)	86120	Map4k4	2.81564	5.36252e-06	0.000560704	3.31364	8.59945e-08	2.22855e-05	3.06544	6.35725e-07	0.000103176	-2.32724	0.000116606	0.00115319	-2.00039	0.000694864	0.00366173	7.47575	13.5309	78.0754	101.374	73.2391	187.416	100.907	113.764	5.45195	40.6153	14.8502	29.8323	1	0	1	0	1	0	0	1
chr10	118172612	118172811	Intergenic	30924	Mdm1	3.24851	6.93701e-09	2.90763e-06	3.30893	4.5974e-09	1.9611e-06	3.20082	9.22687e-09	3.22285e-06	0.876256	0.0573718	0.167633	1.20572	0.00717304	0.0276427	3.73787	8.4568	76.5077	62.3837	48.826	99.3144	76.5505	59.0696	137.662	139.253	108.902	209.666	1	0	1	0	1	0	0	0
chr5	123603691	123603890	intron (NM_001347468, intron 17 of 24)	-30775	Vps33a	2.73516	6.74495e-05	0.00378487	3.30659	1.44374e-06	0.000226427	2.52329	0.000219497	0.00877297	-1.74523	0.00664056	0.0311612	-0.919289	0.142201	0.293411	5.23302	3.38272	39.5081	43.6686	28.4819	100.916	27.8365	42.2967	23.1708	9.67032	22.2754	14.2859	1	0	1	0	1	0	0	1
chr2	34204407	34204606	intron (NM_016768, intron 5 of 8)	-96771	C230014O12Rik	3.37725	1.02315e-05	0.00091669	3.30164	1.83431e-05	0.00160759	2.86646	0.000174849	0.00751836	-1.09225	0.116364	0.280825	-1.17863	0.0872816	0.206334	2.24272	1.69136	28.8471	49.907	24.413	49.6572	32.012	20.4191	24.5338	5.80219	4.95008	13.4455	1	0	1	0	1	0	0	0
chr7	102326391	102326590	intron (NM_009287, intron 1 of 11)	58666	Stim1	2.50224	5.32436e-05	0.00321802	3.2995	9.00179e-08	2.28371e-05	3.39942	2.39565e-08	7.08437e-06	-1.85406	0.00118444	0.00775291	-0.863381	0.0981373	0.224968	5.9806	3.38272	35.7454	37.4302	50.8605	81.6941	61.9363	78.7594	20.4448	11.6044	22.2754	48.3199	1	0	1	0	1	0	0	1
chr2	163103347	163103546	Intergenic	-13845	Gtsf1l	4.66506	5.34822e-15	1.81677e-11	3.29173	5.11613e-08	1.45063e-05	2.97409	6.90323e-07	0.000110182	1.65321	0.00144604	0.00910308	1.8531	0.000298607	0.00173645	8.22332	1.69136	197.227	237.058	86.4628	70.4812	104.387	21.513	308.035	224.351	207.903	278.574	1	0	1	0	1	0	1	0
chr3	93597215	93597414	Intergenic	42197	S100a10	2.96868	1.02598e-09	5.76545e-07	3.28345	1.61743e-11	1.73252e-08	3.24103	1.8794e-11	1.88731e-08	-0.0100617	0.981242	0.992588	-0.169014	0.68868	0.817307	11.9612	13.5309	128.244	101.374	120.031	171.397	121.785	158.977	198.996	87.0329	106.427	139.917	1	0	1	0	1	0	0	0
chr12	25394401	25394600	Intergenic	265326	Gm17746	1.98067	0.0101449	0.121431	3.28264	1.71055e-05	0.00153542	2.67519	0.00042541	0.0140353	-2.36963	0.00148431	0.00930749	-1.55403	0.0301516	0.0904241	4.48545	1.69136	13.7965	24.9535	21.3614	83.296	34.7957	29.5348	2.72597	13.5384	12.3752	7.56311	0	0	1	0	1	0	0	1
chr2	69380362	69380561	promoter-TSS (NM_175512)	-1	Dhrs9	3.05524	5.54864e-09	2.37813e-06	3.28168	4.22336e-10	2.57924e-07	3.2605	3.91231e-10	2.61918e-07	0.431312	0.356979	0.584035	-0.0662406	0.886678	0.938199	8.22332	16.9136	115.702	123.208	125.117	156.981	92.5565	183.407	280.775	102.505	118.802	143.699	1	0	1	0	1	0	0	0
chr19	29523864	29524063	intron (NM_001081319, intron 1 of 25)	1681	Ric1	3.28819	2.0322e-08	6.78927e-06	3.27481	3.07028e-08	9.99956e-06	2.88965	7.47982e-07	0.00011647	-0.866467	0.0841142	0.222712	0.645784	0.163788	0.324695	5.9806	1.69136	52.991	63.9433	52.8949	62.472	42.4507	44.1199	29.9857	30.945	54.4509	81.0933	1	0	1	0	1	0	0	0
chr10	107941660	107941859	Intergenic	-4886	Gm29685	2.2611	0.000495513	0.0166155	3.27431	3.8005e-07	7.8962e-05	3.94447	5.00429e-10	3.13269e-07	0.0646531	0.906159	0.957719	-1.16687	0.0303691	0.0909507	2.24272	6.76544	22.2625	31.1919	50.8605	60.8701	80.0301	101.731	89.9571	25.1428	37.1256	39.4962	1	0	1	0	1	0	0	0
chr9	69300371	69300570	intron (NM_001289916, intron 1 of 9)	10629	Rora	3.2126	6.8976e-10	4.10467e-07	3.27108	4.3489e-10	2.58797e-07	3.22306	4.67016e-10	2.9816e-07	-0.552873	0.218506	0.431371	0.0973757	0.820465	0.899944	10.466	3.38272	74.6263	104.493	78.3251	107.324	71.6791	105.742	65.4234	58.0219	84.1514	105.043	1	0	1	0	1	0	0	0
chr4	134047788	134047987	Intergenic	-20565	Crybg2	2.25254	0.000353519	0.013108	3.26845	1.91574e-07	4.46099e-05	2.29547	0.000246283	0.00950468	-2.25213	0.000225619	0.00197841	0.206296	0.720768	0.837338	8.9709	8.4568	47.347	56.1454	50.8605	171.397	43.1466	62.7159	8.17792	32.8791	42.0757	78.9925	1	0	1	0	1	0	0	1
chrX	164013296	164013495	intron (NM_181315, intron 2 of 7)	14615	Car5b	3.5482	2.5342e-08	7.93205e-06	3.26621	3.96954e-07	8.14289e-05	3.09277	1.11857e-06	0.000157369	1.13939	0.027828	0.0965009	0.535614	0.294484	0.484759	2.9903	3.38272	58.0079	56.1454	37.6367	56.0646	29.2284	51.777	151.292	61.8901	74.2512	50.0005	1	0	1	0	1	0	0	0
chr12	117761783	117761982	Intergenic	-81979	Cdca7l	3.83179	3.84309e-09	1.73126e-06	3.26478	7.06259e-07	0.00012562	2.60102	6.80086e-05	0.00380937	0.454237	0.411673	0.634954	-0.795906	0.165907	0.327627	3.73787	3.38272	74.6263	81.0989	63.067	38.4443	41.0589	21.8776	94.0461	48.3516	7.42512	22.6893	1	0	1	0	1	0	0	0
chr19	21913111	21913310	Intergenic	134870	Tmem2	3.10749	1.46955e-07	3.32881e-05	3.26053	4.10823e-08	1.23655e-05	2.8803	9.7157e-07	0.000140496	1.45493	0.00305672	0.0167433	1.80121	0.000188368	0.00115577	5.9806	3.38272	64.9061	53.0262	79.3423	52.8609	55.6731	45.2138	284.864	98.6373	131.177	239.919	1	0	1	0	1	0	0	0
chr13	113183283	113183482	Intergenic	-2485	Gzmk	2.88648	2.14961e-07	4.50503e-05	3.2601	5.07838e-09	2.12859e-06	3.23485	4.48718e-09	1.89729e-06	-0.668229	0.174364	0.371823	-0.726484	0.130749	0.276521	8.22332	6.76544	91.5583	45.2282	76.2907	108.925	80.726	99.5432	74.9643	36.7472	61.876	46.6392	1	0	1	0	1	0	0	0
chr13	115131396	115131595	Intergenic	-29531	Itga1	2.05023	0.00871925	0.110747	3.25826	2.63177e-05	0.00209334	2.38169	0.00203358	0.0411513	-2.73475	0.000422556	0.0033298	-1.11027	0.123817	0.266308	3.73787	1.69136	12.8558	23.3939	26.4474	64.0738	19.4856	25.5239	5.45195	3.86813	2.47504	13.4455	0	0	1	0	0	0	0	1
chr12	106008764	106008963	Intergenic	-1400	Vrk1	2.45086	0.000103827	0.00525151	3.25761	2.30734e-07	5.19713e-05	3.02244	1.34831e-06	0.00018256	-1.25822	0.0321655	0.107767	-0.0151601	0.978658	0.989849	10.466	3.38272	48.2876	57.705	39.6712	155.379	61.9363	99.1786	21.8078	54.1538	64.3511	93.6985	1	0	1	0	1	0	0	0
chr4	89689177	89689376	intron (NM_175647, intron 1 of 1)	1078	Dmrta1	0.951632	0.199492	0.656647	3.23651	7.48323e-06	0.000823531	3.63866	3.71263e-07	6.75307e-05	-0.733903	0.271255	0.493696	-2.45052	0.000300025	0.00174365	6.72817	1.69136	16.6185	3.11919	73.2391	57.6664	66.8077	110.117	54.5195	19.3406	2.47504	20.1683	0	0	1	0	1	0	0	0
chr3	37738428	37738627	Intergenic	-14167	Gm5148	3.3186	1.20205e-08	4.52666e-06	3.22245	4.2132e-08	1.25361e-05	3.70125	1.3965e-10	1.0356e-07	0.317292	0.508984	0.714445	0.0920221	0.841388	0.912602	5.23302	3.38272	52.0503	74.8605	69.1702	46.4535	91.1647	74.0193	46.3416	102.505	91.5765	85.7152	1	0	1	0	1	0	0	0
chr18	65405452	65405651	intron (NR_105742, intron 3 of 6)	-11663	Alpk2	2.28387	9.03869e-05	0.00477199	3.21081	3.30985e-08	1.04275e-05	3.09706	8.11742e-08	1.96621e-05	-0.774202	0.151756	0.337899	-0.484313	0.362252	0.552957	11.9612	10.1482	67.101	63.9433	69.1702	193.823	98.1238	141.111	73.6013	73.4944	32.1755	128.153	1	0	1	0	1	0	0	0
chr7	28444732	28444931	intron (NM_001039192, intron 4 of 6)	3894	Gmfg	2.87296	1.06534e-07	2.5548e-05	3.2093	3.13624e-09	1.42616e-06	3.07567	9.89657e-09	3.28989e-06	-1.38839	0.00538654	0.0263649	0.170209	0.716954	0.834985	12.7088	5.07408	87.7957	82.6584	58.9981	161.786	91.8606	105.742	38.1636	40.6153	91.5765	129.833	1	0	1	0	1	0	0	0
chr10	68199549	68199748	intron (NM_023598, intron 3 of 9)	79078	Arid5b	1.72211	0.0358576	0.268613	3.20335	7.95312e-05	0.00465238	2.35709	0.00356978	0.0592121	-1.32644	0.0835859	0.221691	-1.7882	0.0230168	0.0727856	3.73787	1.69136	12.8558	15.5959	25.4302	67.2775	22.2692	24.43	4.08896	29.011	0	7.98328	0	0	1	0	0	0	0	0
chr5	77166277	77166476	Intergenic	44829	Spink2	2.63989	6.12247e-05	0.0035599	3.19671	1.21557e-06	0.000197949	3.05767	2.69535e-06	0.000319217	-1.71167	0.00539207	0.026384	-2.08611	0.000587577	0.00315992	6.72817	1.69136	32.9234	46.7878	38.654	81.6941	40.363	65.9975	13.6299	19.3406	14.8502	8.82363	1	0	1	0	1	0	0	1
chr17	57183010	57183209	Intergenic	11072	Tnfsf14	1.77041	0.00563698	0.0832202	3.19295	4.05351e-07	8.27911e-05	2.67183	1.89329e-05	0.00141929	1.09235	0.0408084	0.12965	2.45668	2.52624e-06	2.54483e-05	7.47575	0	11.6016	32.7515	31.5335	89.7033	38.2753	42.6614	106.313	162.461	242.554	254.204	0	0	1	0	1	0	0	0
chr6	134903483	134903682	Intergenic	5621	2810454H06Rik	2.81987	7.62356e-08	1.97565e-05	3.18918	1.29321e-09	7.08358e-07	3.41458	4.96232e-11	4.27132e-08	-1.78664	0.000299581	0.00250441	-1.84597	9.91217e-05	0.000658562	11.2136	10.1482	95.9481	82.6584	133.254	100.916	123.177	152.414	40.8896	21.2747	17.3253	48.3199	1	0	1	0	1	0	0	1
chr16	92653946	92654145	intron (NM_001111023, intron 3 of 5)	43284	Runx1	2.6725	0.000387974	0.0140188	3.18837	2.33835e-05	0.00193333	2.76638	0.000211793	0.00859517	-1.11545	0.103761	0.258394	-0.873772	0.192498	0.363021	2.9903	1.69136	16.932	35.8706	25.4302	51.259	18.7897	35.3688	9.54091	23.2088	9.90016	16.3867	0	0	1	0	0	0	0	0
chrX	69189681	69189880	Intergenic	-170551	Aff2	2.6475	0.000685821	0.0202934	3.18808	4.37671e-05	0.0030798	3.5789	3.27532e-06	0.000365457	0.0392032	0.954428	0.980733	-1.12646	0.0976943	0.224198	2.9903	0	27.9065	14.0363	32.5507	33.6387	27.8365	60.5281	57.2455	9.67032	22.2754	15.9666	0	0	1	0	1	0	0	0
chr7	139152638	139152837	intron (NM_001162540, intron 1 of 11)	35757	Stk32c	2.45488	0.000701307	0.0206813	3.18763	1.03258e-05	0.001075	2.46852	0.000587713	0.0174762	-1.10667	0.0930686	0.239297	-1.44821	0.030901	0.09228	4.48545	1.69136	26.6523	26.5131	25.4302	68.8793	32.012	21.8776	13.6299	27.0769	4.95008	10.5043	1	0	1	0	1	0	0	0
chr1	61054502	61054701	Intergenic	76687	Icos	3.37197	7.48427e-09	3.10997e-06	3.17954	6.95785e-08	1.84387e-05	3.4157	3.74616e-09	1.61225e-06	0.953774	0.0460682	0.141908	0.909276	0.0486859	0.132316	5.23302	3.38272	53.9316	79.5393	44.7572	70.4812	68.8955	66.7267	159.469	67.6922	108.902	151.262	1	0	1	0	1	0	0	0
chr1	69548583	69548782	exon (NM_011770, exon 6 of 8)	137278	Ikzf2	3.04674	2.25299e-06	0.00029917	3.17719	9.73344e-07	0.000166373	3.34256	1.5849e-07	3.25087e-05	2.26696	1.19107e-05	0.00017649	0.982672	0.0529534	0.141121	3.73787	1.69136	43.8978	32.7515	49.8433	35.2406	52.1935	44.8491	354.377	96.7032	101.477	98.7406	1	0	1	0	1	0	1	0
chr14	63195249	63195448	Intergenic	-1823	Neil2	3.50024	1.66608e-08	5.99317e-06	3.17213	5.14369e-07	0.000100664	3.15491	3.21587e-07	5.91647e-05	2.27882	3.62432e-07	9.90923e-06	2.74535	7.47345e-11	2.43074e-09	1.49515	3.38272	44.2114	38.9898	21.3614	46.4535	31.3161	33.9103	193.544	148.923	207.903	262.608	1	0	1	0	1	0	1	0
chr6	31072582	31072781	Intergenic	-9588	Mir29b-1	2.49223	0.00153432	0.0351341	3.16547	5.59761e-05	0.00362373	2.33778	0.00277293	0.0505717	-1.94112	0.00976438	0.0424824	-0.293642	0.67734	0.809951	3.73787	0	15.0507	28.0727	20.3442	51.259	19.4856	17.5021	5.45195	9.67032	22.2754	9.66397	0	0	1	0	0	0	0	1
chr17	7931151	7931350	intron (NM_145968, intron 7 of 9)	5250	Tagap	2.61721	0.000347548	0.0129463	3.15742	1.63636e-05	0.00149139	3.04236	2.45957e-05	0.00175605	-0.254828	0.681382	0.835318	0.548988	0.349001	0.540327	2.9903	0	16.3049	24.9535	28.4819	32.0369	28.5325	26.6178	17.7188	32.8791	59.401	28.1516	0	0	1	0	1	0	0	0
chr19	40477737	40477936	intron (NM_178362, intron 1 of 28)	-26438	Sorbs1	2.4297	0.000138401	0.00652123	3.15643	6.98433e-07	0.00012562	2.36309	0.000186707	0.00784623	-1.24362	0.0325007	0.108663	0.358515	0.518604	0.691846	6.72817	3.38272	28.8471	48.3474	42.7228	88.1015	38.9712	32.8164	13.6299	38.6813	44.5507	48.74	1	0	1	0	1	0	0	0
chr7	45069776	45069975	intron (NM_001163684, intron 1 of 8)	7446	Nosip	2.74835	4.25231e-06	0.000481149	3.15334	1.37861e-07	3.32259e-05	2.54123	1.92193e-05	0.00143629	-1.35004	0.0147819	0.0591405	0.0605324	0.909068	0.951003	8.9709	5.07408	55.813	70.1817	57.9809	112.129	57.7608	49.5893	14.9929	48.3516	39.6007	69.3285	1	0	1	0	1	0	0	0
chr2	143924799	143924998	intron (NM_019771, intron 1 of 3)	9567	Dstn	2.07965	0.00718075	0.0971175	3.14955	4.02065e-05	0.00287542	3.37589	7.34729e-06	0.000665703	0.101444	0.875094	0.942809	-1.11663	0.0815141	0.196261	1.49515	1.69136	10.9745	12.4767	21.3614	32.0369	20.8774	40.8382	35.4377	21.2747	12.3752	13.8657	0	0	1	0	1	0	0	0
chr2	166469254	166469453	Intergenic	21902	5031425F14Rik	0.128514	0.869207	0.987171	3.14777	3.00521e-05	0.00233159	1.8735	0.0129823	0.135039	-3.43524	1.18666e-05	0.000175944	-1.60223	0.0321323	0.0952429	7.47575	6.76544	7.21179	9.35756	26.4474	153.777	22.2692	43.3906	0	11.6044	7.42512	10.0841	0	0	1	0	0	0	0	1
chr3	116200086	116200285	Intergenic	53299	Gpr88	4.32697	4.70692e-10	3.08263e-07	3.14615	1.09377e-05	0.00112174	3.32993	1.74213e-06	0.000222743	2.72599	7.4002e-08	2.60178e-06	1.46195	0.00247678	0.0111377	1.49515	0	63.0247	38.9898	21.3614	22.4258	27.1406	23.3361	205.811	114.11	89.1015	60.925	1	0	1	0	1	0	1	0
chr13	46159348	46159547	Intergenic	-114274	Stmnd1	3.58583	5.99968e-08	1.6247e-05	3.13823	3.12775e-06	0.000428306	3.64749	2.81058e-08	7.96914e-06	1.80422	0.000451661	0.00351939	1.8603	0.000128525	0.000827346	2.9903	0	56.1265	28.0727	23.3958	40.0461	38.9712	51.777	110.402	125.714	111.377	237.818	1	0	1	0	1	0	1	0
chr1	126817806	126818005	intron (NM_001081756, intron 1 of 16)	12727	Nckap5	3.45067	4.09099e-12	5.4776e-09	3.13782	4.23398e-10	2.57924e-07	2.58581	2.07808e-07	4.05538e-05	0.302026	0.481713	0.693555	0.122722	0.774481	0.871967	9.71847	10.1482	114.134	148.161	119.013	88.1015	74.4628	65.2682	171.736	85.0988	89.1015	66.3873	1	0	1	0	1	0	0	0
chr4	41241041	41241240	intron (NM_026872, intron 2 of 28)	33995	Ubap2	2.95925	9.24566e-08	2.29721e-05	3.13565	1.83296e-08	6.90253e-06	2.92872	1.0067e-07	2.31072e-05	1.59693	0.000473354	0.00365474	1.79523	5.80557e-05	0.000410564	6.72817	5.07408	53.3045	71.7413	35.6023	107.324	52.8894	67.456	258.968	187.604	227.704	217.229	1	0	1	0	1	0	1	0
chr3	106966987	106967186	Intergenic	-69076	Kcna3	2.18939	0.00443578	0.0713424	3.12655	4.42263e-05	0.00310305	2.66866	0.00043674	0.0142525	-0.604564	0.380751	0.60657	-0.152002	0.821828	0.900825	0.747575	5.07408	11.9151	24.9535	21.3614	52.8609	22.9652	28.0763	24.5338	21.2747	9.90016	32.3533	0	0	1	0	1	0	0	0
chr9	94610651	94610850	Intergenic	-59142	Slc9a9	2.53624	7.49049e-05	0.00409361	3.1244	1.07051e-06	0.000179169	3.99072	2.07895e-10	1.44098e-07	-0.0452175	0.933853	0.971248	-1.59121	0.00293291	0.0128872	2.24272	6.76544	30.7285	32.7515	49.8433	48.0554	70.2873	113.764	68.1494	25.1428	24.7504	31.0928	1	0	1	0	1	0	0	0
chr1	138560825	138561024	intron (NM_001311148, intron 2 of 7)	58833	Nek7	2.53768	1.62547e-06	0.000231807	3.12373	3.54712e-09	1.58313e-06	3.20559	8.13387e-10	4.68499e-07	-0.188538	0.680583	0.834854	0.20129	0.648294	0.789459	5.23302	13.5309	48.6012	71.7413	61.0326	121.74	90.4688	101.002	74.9643	83.1648	118.802	104.623	1	0	1	0	1	0	0	0
chr4	137603900	137604099	intron (NM_001347227, intron 1 of 26)	9810	Usp48	2.1175	0.00437148	0.0706165	3.11918	2.49624e-05	0.0020054	2.43713	0.000946218	0.0248148	-3.26563	2.07562e-05	0.00027969	-3.15097	3.54022e-05	0.000264362	5.9806	6.76544	25.7116	46.7878	32.5507	123.342	35.4916	55.0587	0	11.6044	0	4.6219	0	0	1	0	1	0	0	1
chr7	58824747	58824946	intron (NM_009728, intron 17 of 20)	166644	Atp10a	2.38722	0.000133621	0.0063269	3.11192	6.0378e-07	0.000113473	3.22498	1.68026e-07	3.41738e-05	0.842383	0.122747	0.291561	0.237032	0.660093	0.797598	2.9903	10.1482	42.9572	37.4302	42.7228	97.7126	66.1118	84.5935	201.722	56.0879	86.6264	93.2783	1	0	1	0	1	0	0	0
chr15	102150296	102150495	promoter-TSS (NM_146064)	-180	Soat2	2.46481	0.000123602	0.00600592	3.11107	1.23043e-06	0.000199025	2.71409	1.92616e-05	0.00143723	-0.363317	0.521071	0.724053	1.53392	0.00454991	0.0187273	6.72817	1.69136	27.5929	45.2282	27.4646	89.7033	41.0589	44.4845	27.2597	61.8901	123.752	142.859	1	0	1	0	1	0	0	0
chr6	134220312	134220511	intron (NM_001303102, intron 3 of 8)	-175918	Bcl2l14	3.08719	2.02558e-06	0.000275811	3.09114	2.63856e-06	0.000372973	3.3079	2.59949e-07	4.89455e-05	3.03852	3.66483e-10	3.2177e-08	2.9586	1.25405e-10	3.86248e-09	2.9903	0	34.1776	24.9535	31.5335	28.8332	20.1815	49.9539	363.918	189.538	279.68	331.096	1	0	1	0	1	0	1	0
chr13	33071912	33072111	Intergenic	-12092	Serpinb1b	1.96395	0.000856821	0.0234386	3.08794	1.25431e-07	3.06905e-05	2.77617	1.61272e-06	0.00021124	-0.556792	0.28848	0.513709	0.588562	0.244555	0.428469	10.466	3.38272	39.5081	31.1919	41.7056	124.944	54.2813	75.8424	58.6084	50.2857	89.1015	110.926	1	0	1	0	1	0	0	0
chr13	20092342	20092541	intron (NM_080288, intron 1 of 21)	1934	Elmo1	2.65201	2.21778e-06	0.000295308	3.08514	3.8174e-08	1.15727e-05	2.81846	4.04521e-07	7.1539e-05	-1.91821	0.000361045	0.00292538	-1.00452	0.048869	0.132702	8.9709	11.8395	63.6519	90.4564	64.0842	147.37	57.7608	113.399	21.8078	29.011	34.6506	45.7988	1	0	1	0	1	0	0	1
chr6	31072168	31072367	Intergenic	-9174	Mir29b-1	2.0579	0.00143571	0.0335291	3.07868	1.61372e-06	0.000245377	2.6956	2.31242e-05	0.00167111	-1.45644	0.0158136	0.0623399	-1.41437	0.0177204	0.0589156	4.48545	10.1482	39.5081	29.6323	41.7056	110.527	39.6671	72.5608	16.3558	34.8132	14.8502	22.2691	1	0	1	0	1	0	0	0
chr19	32148820	32149019	intron (NM_001168526, intron 2 of 5)	-45779	Asah2	2.13109	0.00189679	0.0406714	3.07826	6.4882e-06	0.000737605	2.88771	1.93032e-05	0.00143811	-3.68037	1.07306e-06	2.39241e-05	-2.14129	0.000869796	0.00445736	5.23302	5.07408	23.8303	34.3111	34.5851	83.296	37.5793	62.3512	0	5.80219	9.90016	9.66397	1	0	1	0	1	0	0	1
chr13	115107548	115107747	Intergenic	-5683	Itga1	2.22273	0.000883701	0.0238234	3.07596	3.79737e-06	0.00048681	3.31557	3.97438e-07	7.06911e-05	0.620787	0.264512	0.486048	-0.0893742	0.869439	0.928869	2.24272	5.07408	19.754	24.9535	41.7056	41.648	34.7957	63.8097	94.0461	36.7472	56.9259	38.6559	0	0	1	0	1	0	0	0
chr12	117407013	117407212	Intergenic	-70100	Gm5441	3.4825	7.10349e-08	1.87105e-05	3.07419	2.96004e-06	0.000408825	3.06937	1.87201e-06	0.0002356	2.59185	1.61111e-07	5.01995e-06	2.12736	7.79101e-06	6.9097e-05	1.49515	3.38272	34.4912	53.0262	39.6712	22.4258	42.4507	21.513	271.234	146.989	158.403	141.178	1	0	1	0	1	0	1	0
chrX	101764670	101764869	Intergenic	-30622	Cxcr3	2.8841	6.08424e-06	0.00061226	3.07376	1.78845e-06	0.000271091	2.91601	3.78931e-06	0.000403206	0.413523	0.411491	0.634852	1.44325	0.00206114	0.00949144	2.24272	3.38272	28.22	31.1919	28.4819	40.0461	29.2284	30.9933	49.0675	42.5494	94.0516	80.253	1	0	1	0	1	0	0	0
chr7	84386621	84386820	intron (NM_007488, intron 1 of 18)	23318	Arnt2	3.30251	2.74269e-09	1.29611e-06	3.07091	4.28784e-08	1.26026e-05	3.40079	7.23734e-10	4.30685e-07	-0.743021	0.13531	0.311963	-1.72478	0.000462665	0.0025572	6.72817	8.4568	81.5246	102.933	56.9637	99.3144	80.726	115.222	61.3344	27.0769	29.7005	26.4709	1	0	1	0	1	0	0	0
chr12	103116717	103116916	intron (NM_001081017, intron 30 of 48)	125330	Prima1	1.63873	0.00327956	0.0585703	3.06538	2.37559e-08	8.41973e-06	2.8524	1.51104e-07	3.11262e-05	-3.1333	7.72684e-08	2.695e-06	-3.0457	2.32876e-08	3.99328e-07	8.9709	10.1482	29.1607	37.4302	74.2563	112.129	80.0301	78.0302	9.54091	7.73626	7.42512	8.40345	0	0	1	0	1	0	0	1
chr11	116254680	116254879	intron (NM_146032, intron 8 of 15)	-16688	Evpl	2.45949	0.000400015	0.014357	3.06465	1.01524e-05	0.00106384	2.43662	0.000424537	0.0140161	-0.382156	0.556817	0.750152	1.28712	0.0439317	0.122253	10.466	1.69136	23.8303	81.0989	37.6367	126.546	46.6262	53.6002	20.4448	102.505	118.802	149.581	1	0	1	0	1	0	0	0
chr12	117444670	117444869	Intergenic	-71710	Rapgef5	3.93847	3.35851e-11	3.11321e-08	3.06435	3.96992e-07	8.14289e-05	3.40396	9.47974e-09	3.24073e-06	0.276988	0.582581	0.768523	-0.898099	0.0710564	0.176759	5.23302	3.38272	86.5414	110.731	64.0842	38.4443	69.5914	63.0805	88.5942	36.7472	29.7005	37.3954	1	0	1	0	1	0	0	0
chr6	29245849	29246048	Intergenic	-26540	Hilpda	3.4704	1.1784e-08	4.47255e-06	3.06309	7.04557e-07	0.00012562	3.35606	2.9123e-08	8.16154e-06	-0.763086	0.150404	0.335793	-0.395095	0.420521	0.607376	5.23302	1.69136	59.5756	62.3837	32.5507	59.2683	59.8486	52.1417	24.5338	27.0769	39.6007	43.698	1	0	1	0	1	0	0	0
chrX	9200622	9200821	exon (NM_173414, exon 1 of 5)	748	Lancl3	2.83905	4.47037e-08	1.27503e-05	3.06092	4.31367e-09	1.85649e-06	2.78584	6.42982e-08	1.63984e-05	-0.67716	0.141536	0.321519	-0.701582	0.120778	0.261427	9.71847	8.4568	89.0499	65.5029	89.5144	94.5089	70.2873	79.8533	59.9714	52.2197	27.2254	57.5637	1	0	1	0	1	0	0	0
chr12	25994166	25994365	Intergenic	216240	Gm29687	2.71759	7.40916e-08	1.93047e-05	3.06068	1.5124e-09	7.75537e-07	2.96963	2.93155e-09	1.32062e-06	0.408929	0.34969	0.576837	0.195638	0.64925	0.790053	10.466	10.1482	68.9823	93.5756	73.2391	134.555	104.387	88.6044	173.099	102.505	89.1015	129.413	1	0	1	0	1	0	0	0
chr6	113673042	113673241	intron (NM_001113553, intron 5 of 11)	-23909	Tatdn2	2.63574	2.95627e-05	0.0020386	3.05857	1.30353e-06	0.000208056	2.54578	4.89887e-05	0.002974	-1.71352	0.00416864	0.0214952	-1.38685	0.0175752	0.0585055	8.22332	3.38272	45.1521	54.5858	33.5679	104.12	43.8426	48.4954	16.3558	21.2747	17.3253	15.5464	1	0	1	0	1	0	0	1
chr19	10815956	10816155	intron (NM_001037801, intron 1 of 11)	14003	Cd6	2.4844	5.5425e-05	0.00331245	3.05641	7.05352e-07	0.00012562	2.79921	4.34956e-06	0.000449909	-0.84231	0.128021	0.30049	1.07552	0.0384638	0.10983	3.73787	8.4568	34.1776	48.3474	34.5851	91.3052	36.8834	64.9036	24.5338	42.5494	101.477	123.951	1	0	1	0	1	0	0	0
chr10	26229590	26229789	promoter-TSS (NM_001013766)	-18	Samd3	2.20622	0.000793646	0.0223846	3.04446	3.39704e-06	0.000456112	3.44582	1.06365e-07	2.40706e-05	-2.30369	0.000363093	0.00293704	-2.71743	1.27866e-05	0.000106725	4.48545	10.1482	38.5674	40.5494	67.1358	81.6941	98.1238	101.366	21.8078	1.93406	2.47504	18.4876	1	0	1	0	1	0	0	1
chr7	3411379	3411578	intron (NM_133190, intron 2 of 3)	-3588	Gm23450	1.28027	0.0700945	0.390934	3.04088	1.13903e-05	0.00115101	2.39541	0.000501115	0.0156443	-1.69569	0.0100704	0.0435269	-0.600831	0.341498	0.532664	5.9806	3.38272	8.15246	23.3939	46.7916	65.6757	29.9243	38.2858	8.17792	23.2088	14.8502	26.4709	0	0	1	0	1	0	0	1
chr11	86590176	86590375	intron (NM_029478, intron 10 of 11)	-6117	Mir21a	3.07068	3.06661e-06	0.000374219	3.02626	5.3262e-06	0.000632349	2.48972	0.000149976	0.00673673	0.296462	0.591236	0.774552	1.72425	0.00106427	0.00532656	3.73787	1.69136	32.2963	45.2282	22.3786	52.8609	25.0529	24.43	31.3487	61.8901	76.7263	98.7406	1	0	1	0	1	0	0	0
chr15	62779066	62779265	Intergenic	-559714	H2afy3	2.08619	0.0048128	0.0754959	3.02494	3.92707e-05	0.00283797	2.85315	8.48863e-05	0.00453122	-1.39689	0.0400511	0.127773	-0.253208	0.687912	0.816772	2.24272	3.38272	12.8558	21.8343	27.4646	41.648	22.9652	36.4627	8.17792	15.4725	14.8502	31.9331	0	0	1	0	1	0	0	0
chr9	5311575	5311774	intron (NM_007609, intron 1 of 8)	2825	Casp4	2.92348	5.54572e-05	0.00331245	3.02107	3.67645e-05	0.00269612	2.89691	5.57389e-05	0.00329256	2.82103	1.03421e-06	2.32081e-05	2.1108	0.00017331	0.00107584	2.24272	0	26.3387	18.7151	25.4302	24.0277	16.7019	28.0763	324.391	79.2966	79.2013	136.556	0	0	1	0	0	0	1	0
chr4	145278368	145278567	intron (NM_009401, intron 10 of 12)	-31597	Tnfrsf1b	2.09114	0.00560651	0.0829395	3.01529	5.92328e-05	0.00376668	2.74436	0.000216066	0.00870803	-0.649924	0.334167	0.561218	-0.409627	0.530934	0.700865	2.9903	1.69136	15.3642	17.1555	23.3958	43.2498	13.9183	38.6505	13.6299	27.0769	19.8003	19.3279	0	0	1	0	0	0	0	0
chr5	64438475	64438674	Intergenic	29368	1700027F09Rik	2.85966	4.17367e-06	0.000475601	3.01473	1.43982e-06	0.000226427	2.92824	1.9851e-06	0.000246612	-0.347541	0.518784	0.72227	-0.565384	0.281369	0.470595	2.9903	6.76544	33.5505	54.5858	39.6712	57.6664	53.5854	37.192	32.7117	42.5494	27.2254	31.5129	1	0	1	0	1	0	0	0
chr10	67100381	67100580	Intergenic	-3492	Reep3	2.79384	2.32862e-07	4.79675e-05	3.01187	3.14736e-08	1.00898e-05	2.96552	2.80836e-08	7.96914e-06	1.24456	0.00367184	0.0194047	1.57201	0.000128994	0.000829922	6.72817	3.38272	51.4232	45.2282	57.9809	56.0646	45.9303	63.8097	164.921	114.11	138.602	199.582	1	0	1	0	1	0	0	0
chr5	23722093	23722292	Intergenic	-9525	AI506816	2.0106	0.0074299	0.0993167	3.00837	5.54812e-05	0.00360419	2.48143	0.000793976	0.0219194	-1.34542	0.0529454	0.15775	0.451603	0.487807	0.665759	1.49515	5.07408	10.9745	24.9535	26.4474	48.0554	18.7897	29.8994	5.45195	21.2747	39.6007	31.0928	0	0	1	0	0	0	0	0
chr12	106016367	106016566	intron (NM_001029843, intron 1 of 13)	6203	Vrk1	3.11539	4.76216e-06	0.000513774	3.00569	1.22117e-05	0.00120621	2.95399	1.29027e-05	0.00105771	-0.051081	0.931755	0.970345	0.322667	0.574522	0.734562	5.23302	0	25.0845	63.9433	24.413	56.0646	39.6671	36.4627	39.5266	36.7472	42.0757	53.7821	1	0	1	0	1	0	0	0
chr2	151569687	151569886	Intergenic	-2837	Sdcbp2	3.40122	1.09866e-08	4.2366e-06	2.99892	7.65382e-07	0.000135139	2.33879	9.25e-05	0.0048464	2.96099	3.83189e-11	4.97856e-09	3.64259	5.50284e-17	8.69665e-15	3.73787	1.69136	59.5756	35.8706	33.5679	40.0461	28.5325	17.5021	400.718	220.483	274.73	354.626	1	0	1	0	0	0	1	0
chr10	81508085	81508284	intron (NM_010304, intron 5 of 6)	-8047	S1pr4	2.29969	7.97749e-07	0.000132141	2.99878	1.16736e-10	9.22443e-08	2.38731	2.67265e-07	4.99329e-05	-2.20629	1.64306e-06	3.39035e-05	-0.390321	0.38062	0.57112	32.8933	43.9754	210.082	199.628	179.029	504.581	226.868	210.025	61.3344	75.4285	106.427	216.389	1	0	1	0	1	0	0	1
chr16	49936267	49936466	Intergenic	-44094	Gm6936	2.66845	1.60983e-06	0.00023094	2.99321	7.83804e-08	2.05331e-05	2.9659	7.97173e-08	1.94067e-05	0.868872	0.0856345	0.225607	0.683704	0.17153	0.334985	17.9418	3.38272	92.1855	90.4564	84.4284	148.972	83.5096	143.298	325.754	112.176	153.453	220.17	1	0	1	0	1	0	0	0
chr14	103033447	103033646	intron (NR_045657, intron 1 of 2)	257	4933432I03Rik	3.011	1.93513e-08	6.52287e-06	2.98939	3.27653e-08	1.03905e-05	3.24318	1.00751e-09	5.64699e-07	2.2581	2.54669e-07	7.33306e-06	1.54077	0.000299405	0.00174046	5.23302	8.4568	69.6094	63.9433	69.1702	62.472	89.0769	70.0084	486.586	185.67	264.829	220.591	1	0	1	0	1	0	1	0
chr15	100265675	100265874	Intergenic	-15063	Tmprss12	2.40825	0.000815774	0.0227689	2.98613	3.30949e-05	0.0024848	2.55426	0.000337751	0.0119796	-2.00561	0.00400784	0.0208174	-1.76047	0.00908668	0.0338082	5.23302	1.69136	20.0676	37.4302	28.4819	59.2683	29.2284	32.8164	6.81494	11.6044	12.3752	5.46224	1	0	1	0	1	0	0	1
chr1	155173613	155173812	intron (NM_021433, intron 1 of 7)	15009	Stx6	2.99785	1.11783e-09	6.05411e-07	2.9853	1.6303e-09	8.18579e-07	2.58518	1.376e-07	2.93477e-05	0.169227	0.700936	0.846243	0.38592	0.374992	0.565952	17.9418	6.76544	95.321	157.519	81.3767	168.194	93.2524	91.886	149.929	129.582	113.852	129.833	1	0	1	0	1	0	0	0
chr1	13383605	13383804	Intergenic	-9621	Ncoa2	2.99373	2.87786e-06	0.000355689	2.97952	4.0611e-06	0.000513788	2.89062	5.30853e-06	0.000512789	1.2288	0.0185095	0.0702404	1.71655	0.000611311	0.0032755	2.9903	3.38272	41.7029	32.7515	40.6884	33.6387	30.6202	39.0151	136.299	46.4175	99.0016	144.96	1	0	1	0	1	0	0	0
chr9	41143908	41144107	intron (NM_176860, intron 1 of 13)	13487	Ubash3b	2.39566	0.000219206	0.00919596	2.9758	4.45608e-06	0.000546545	3.15985	7.01086e-07	0.00011153	-0.485054	0.390249	0.614913	-0.00773331	0.988396	0.994596	5.23302	1.69136	22.8896	34.3111	26.4474	60.8701	48.018	49.9539	27.2597	32.8791	42.0757	54.2023	1	0	1	0	1	0	0	0
chr10	127151317	127151516	Intergenic	-13740	B4galnt1	2.41287	0.000465908	0.0159614	2.97167	1.63675e-05	0.00149139	2.40707	0.000430395	0.0141513	-2.13489	0.00153722	0.00956709	-1.65858	0.0104577	0.0379867	5.23302	3.38272	29.1607	34.3111	31.5335	65.6757	25.7488	36.4627	5.45195	13.5384	12.3752	6.72276	1	0	1	0	1	0	0	1
chr3	138419537	138419736	intron (NM_011996, intron 3 of 8)	4139	Adh4	3.32986	6.38901e-12	7.69907e-09	2.96339	1.56887e-09	7.96028e-07	3.83209	1.50227e-15	5.17233e-12	1.10585	0.00645693	0.0304865	-0.138063	0.725829	0.840871	9.71847	8.4568	131.694	90.4564	99.6865	72.083	149.621	172.469	239.886	141.187	126.227	163.027	1	0	1	0	1	0	0	0
chr5	117160551	117160750	intron (NM_001081308, intron 1 of 19)	27062	Taok3	2.42933	6.73957e-05	0.00378487	2.9629	1.19327e-06	0.000194976	2.97786	7.22175e-07	0.000113759	0.445536	0.394138	0.618372	0.466715	0.35855	0.549603	2.24272	10.1482	29.4743	46.7878	33.5679	78.4904	55.6731	55.7879	87.2312	65.7582	66.8261	88.6564	1	0	1	0	1	0	0	0
chr7	135659576	135659775	intron (NM_001316681, intron 4 of 17)	-7361	5830432E09Rik	1.73765	0.0133489	0.144789	2.96069	2.14128e-05	0.00182357	2.40221	0.000524368	0.0161816	-2.28372	0.000937823	0.00637767	-1.86544	0.00572373	0.0227768	5.23302	8.4568	30.1014	23.3939	27.4646	112.129	26.4447	62.7159	8.17792	15.4725	7.42512	12.185	0	0	1	0	1	0	0	1
chr11	62466767	62466966	intron (NM_001039536, intron 1 of 6)	8406	Pigl	1.76086	0.000874609	0.0237216	2.95583	1.97275e-08	7.25881e-06	2.0347	0.000107743	0.00537611	-2.1978	2.47695e-05	0.00032444	-0.191373	0.704405	0.82711	29.903	21.9877	100.024	96.6948	84.4284	392.452	114.826	125.796	50.4305	42.5494	94.0516	113.867	1	0	1	0	1	0	0	1
chr1	144076786	144076985	Intergenic	-72736	Rgs2	1.30653	0.0902596	0.449917	2.95345	9.51691e-05	0.00530942	3.5407	2.03252e-06	0.000250567	0.274244	0.684438	0.836408	-0.479858	0.466915	0.648408	2.24272	3.38272	7.52534	12.4767	20.3442	51.259	26.4447	83.135	55.8825	30.945	14.8502	57.5637	0	0	1	0	1	0	0	0
chrX	57177513	57177712	Intergenic	-23025	Gm14718	2.56651	3.34329e-07	6.47202e-05	2.95339	4.90889e-09	2.0756e-06	2.9568	2.5142e-09	1.1766e-06	0.233612	0.579325	0.766084	0.961148	0.0164119	0.055228	11.2136	3.38272	60.5163	54.5858	76.2907	76.8886	63.3281	89.3336	99.4981	81.2307	153.453	152.943	1	0	1	0	1	0	0	0
chr16	91366696	91366895	Intergenic	-5988	Ifnar2	2.35578	2.00841e-06	0.000274248	2.95207	2.53649e-09	1.21053e-06	2.62758	9.69971e-08	2.28071e-05	-0.936798	0.0469785	0.144017	-0.540977	0.245719	0.429993	31.3981	15.2222	128.244	151.281	128.168	304.351	156.581	182.678	134.936	81.2307	71.7762	151.262	1	0	1	0	1	0	0	0
chr1	131010587	131010786	Intergenic	-9159	Il10	3.55164	1.75649e-08	6.22547e-06	2.9517	4.2027e-06	0.000524815	2.81023	8.23401e-06	0.000728249	0.860516	0.0996756	0.251416	1.48154	0.00305779	0.0133507	2.24272	5.07408	55.4994	62.3837	45.7744	28.8332	43.8426	24.7946	59.9714	83.1648	64.3511	132.354	1	0	1	0	1	0	0	0
chr12	110690478	110690677	TTS (NM_010480)	5818	Hsp90aa1	2.19556	0.00228223	0.045894	2.95012	3.99282e-05	0.00286402	2.06744	0.0038696	0.0628819	-1.9748	0.00491723	0.0245155	-0.309616	0.646353	0.788128	6.72817	5.07408	18.1862	57.705	64.0842	67.2775	53.5854	13.4912	5.45195	23.2088	32.1755	21.4288	0	0	1	0	0	0	0	1
chr13	43243376	43243575	intron (NM_001033399, intron 1 of 1)	60697	Gfod1	2.22567	8.94705e-07	0.000144236	2.94459	7.2256e-11	6.33251e-08	2.57581	8.44182e-09	3.03666e-06	0.642917	0.10142	0.254462	1.49105	0.000100416	0.000665967	12.7088	18.605	71.8043	87.3372	99.6865	166.592	102.995	99.9078	203.085	216.615	217.804	365.97	1	0	1	0	1	0	0	0
chr17	71288242	71288441	intron (NM_145158, intron 2 of 7)	22624	Emilin2	2.23634	0.00118894	0.0294196	2.94424	1.90733e-05	0.00165951	2.8177	3.6233e-05	0.00236975	-2.58702	0.000201881	0.00180505	-2.8223	3.26496e-05	0.000246095	8.9709	1.69136	31.6692	40.5494	38.654	84.8978	47.3221	63.0805	8.17792	7.73626	0	8.82363	1	0	1	0	1	0	0	1
chr7	80766251	80766450	intron (NM_016721, intron 4 of 37)	36981	Iqgap1	2.83323	1.11086e-10	8.77796e-08	2.94358	2.31433e-11	2.37352e-08	2.5387	6.84594e-09	2.61895e-06	-0.562159	0.176585	0.375067	0.716429	0.0794651	0.192627	38.8739	23.679	257.743	251.095	164.788	389.248	222.692	189.241	174.462	193.406	249.979	433.618	1	0	1	0	1	0	0	0
chr8	77429815	77430014	intron (NM_030113, intron 4 of 22)	-87142	0610038B21Rik	1.89196	0.00411944	0.0680968	2.93444	7.2379e-06	0.000807596	2.97381	3.86166e-06	0.000409099	-1.10594	0.0630319	0.179939	-1.07135	0.0595955	0.154604	2.9903	6.76544	22.576	18.7151	37.6367	54.4627	50.8017	43.026	13.6299	27.0769	27.2254	17.2271	0	0	1	0	1	0	0	0
chr9	69298132	69298331	intron (NM_001289916, intron 1 of 9)	8390	Rora	2.482	6.19653e-07	0.000107441	2.93211	4.07666e-09	1.7703e-06	2.45959	6.43369e-07	0.000103718	-1.26389	0.00629494	0.0298709	-0.198067	0.654102	0.793306	11.2136	15.2222	86.2279	76.4201	79.3423	148.972	71.6791	88.6044	54.5195	34.8132	61.876	75.6311	1	0	1	0	1	0	0	0
chr1	69544360	69544559	intron (NM_011770, intron 6 of 7)	141501	Ikzf2	3.67337	3.89636e-10	2.64525e-07	2.9314	7.4719e-07	0.000132412	2.95701	4.66442e-07	8.0298e-05	1.67978	0.00162665	0.0100087	1.0159	0.0543892	0.144051	8.22332	10.1482	173.71	137.244	136.306	41.648	112.738	71.1023	496.127	125.714	200.478	189.498	1	0	1	0	1	0	1	0
chr5	73193722	73193921	intron (NM_028194, intron 3 of 62)	62797	Fryl	2.34538	0.000136919	0.00646403	2.92795	1.90793e-06	0.000286498	2.79845	4.28495e-06	0.000446098	-1.65141	0.00495454	0.024651	-1.29718	0.0220502	0.0703313	6.72817	10.1482	44.5249	57.705	36.6195	121.74	63.3281	78.0302	14.9929	30.945	34.6506	21.4288	1	0	1	0	1	0	0	1
chr8	115064774	115064973	intron (NM_019573, intron 8 of 8)	625221	Wwox	2.5692	4.41434e-05	0.0027598	2.92565	3.60923e-06	0.000475334	3.32594	7.84838e-08	1.92034e-05	-0.652811	0.24068	0.458892	-1.44045	0.00768144	0.0292766	5.23302	3.38272	37.3132	32.7515	55.9465	35.2406	68.1995	55.0587	19.0818	38.6813	17.3253	23.5297	1	0	1	0	1	0	0	0
chr9	46083608	46083807	intron (NM_027498, intron 1 of 24)	70887	Sik3	2.78616	2.40446e-06	0.000310723	2.92553	9.78529e-07	0.000166668	2.87582	8.37549e-07	0.000126161	2.61789	3.72168e-09	2.09326e-07	3.55284	2.72069e-17	4.65046e-15	2.24272	5.07408	37.6267	26.5131	30.5163	43.2498	21.5733	47.7661	267.145	216.615	398.482	511.77	1	0	1	0	1	0	1	0
chr1	151683007	151683206	intron (NM_022018, intron 5 of 13)	-72268	Edem3	2.82644	4.95452e-10	3.18424e-07	2.91684	1.75287e-10	1.22452e-07	3.1937	1.31933e-12	1.63063e-09	-1.09018	0.00912017	0.04025	-2.46929	6.18607e-09	1.23419e-07	14.9515	15.2222	120.719	118.529	113.927	142.564	142.662	168.093	70.8753	44.4835	19.8003	29.4121	1	0	1	0	1	0	0	0
chr10	118443042	118443241	intron (NM_008337, intron 3 of 3)	2095	Ifng	2.59302	5.57992e-05	0.00332053	2.91369	7.16137e-06	0.00080091	2.59168	4.56703e-05	0.00281869	1.93823	6.16635e-05	0.00068581	1.8673	5.96965e-05	0.000420809	3.73787	0	22.8896	21.8343	29.4991	27.2314	26.4447	18.9606	128.121	104.439	81.6763	92.438	1	0	1	0	0	0	1	0
chr9	32652371	32652570	Intergenic	-43572	Ets1	2.3682	4.2799e-05	0.00269673	2.91144	4.94873e-07	9.85697e-05	3.00997	1.32961e-07	2.84843e-05	0.476674	0.343811	0.571013	1.42071	0.00338776	0.0145579	1.49515	15.2222	44.5249	45.2282	68.153	65.6757	50.8017	92.2506	95.4091	94.7691	146.027	256.305	1	0	1	0	1	0	0	0
chr10	117056025	117056224	exon (NM_007636, exon 11 of 16)	7690	Cct2	2.25333	0.000341666	0.0127964	2.8959	4.09953e-06	0.000517292	2.68328	1.48251e-05	0.00117921	0.378976	0.480013	0.692161	0.454216	0.385107	0.575218	2.24272	8.4568	21.0082	38.9898	53.9121	38.4443	44.5385	35.0042	77.6903	44.4835	51.9759	58.404	1	0	1	0	1	0	0	0
chr6	108310018	108310217	intron (NM_010585, intron 4 of 61)	97021	Itpr1	3.34668	6.71338e-08	1.77801e-05	2.88387	4.37741e-06	0.000539642	2.63442	2.1188e-05	0.00155924	-0.941187	0.0978288	0.248069	-1.2465	0.0263464	0.0813495	7.47575	1.69136	54.8723	88.8968	46.7916	54.4627	31.3161	51.777	23.1708	27.0769	22.2754	13.0254	1	0	1	0	1	0	0	0
chr19	21771641	21771840	Intergenic	-6600	Tmem2	2.73991	3.49524e-05	0.00233025	2.88255	1.50508e-05	0.00139626	2.98174	5.48049e-06	0.000527287	-1.45343	0.0198871	0.074258	-1.39841	0.0184836	0.0609341	7.47575	0	31.9827	51.4666	47.8088	43.2498	51.4976	46.3076	16.3558	13.5384	9.90016	21.4288	1	0	1	0	1	0	0	0
chr5	73557121	73557320	intron (NM_178896, intron 9 of 10)	66194	Dcun1d4	3.22325	2.49548e-06	0.000319912	2.87275	3.51109e-05	0.00260371	3.06545	6.68685e-06	0.000619846	0.607645	0.298744	0.525013	-0.574817	0.320519	0.51209	4.48545	0	40.4487	42.109	41.7056	20.824	42.4507	30.9933	68.1494	30.945	22.2754	24.7902	1	0	1	0	1	0	0	0
chr1	60920543	60920742	Intergenic	11617	Ctla4	1.79362	7.28494e-05	0.00400492	2.87101	1.54578e-10	1.14272e-07	2.77023	4.2008e-10	2.76321e-07	-0.463728	0.25409	0.475009	-0.0665536	0.866271	0.926881	16.4466	20.2963	58.635	79.5393	115.962	181.009	120.393	153.508	114.491	96.7032	103.952	153.363	1	0	1	0	1	0	0	0
chr7	90039590	90039789	intron (NR_110365, intron 3 of 5)	10530	E230029C05Rik	3.09502	1.9473e-07	4.15327e-05	2.86758	2.01861e-06	0.000300312	3.05541	2.24259e-07	4.28957e-05	1.44583	0.00270726	0.0151792	0.899544	0.0530125	0.141248	4.48545	3.38272	48.6012	48.3474	37.6367	44.8517	35.4916	57.9757	156.744	77.3626	81.6763	98.3204	1	0	1	0	1	0	0	0
chr4	98282337	98282536	Intergenic	100829	Tm2d1	2.24534	0.00319863	0.0575515	2.86674	0.000165369	0.00785331	3.03458	5.74406e-05	0.00336831	-1.66054	0.0245008	0.0872415	-2.19386	0.00264496	0.0117841	8.22332	0	25.7116	38.9898	68.153	35.2406	69.5914	48.4954	24.5338	1.93406	2.47504	15.1262	0	0	1	0	1	0	0	0
chr18	61207114	61207313	intron (NM_007885, intron 1 of 3)	4383	Slc26a2	2.9626	1.7353e-08	6.19593e-06	2.86314	7.22931e-08	1.90419e-05	3.23274	5.1881e-10	3.20611e-07	1.34423	0.00195214	0.011594	0.804311	0.0548027	0.144864	5.9806	8.4568	64.9061	70.1817	67.1358	57.6664	68.8955	94.0738	216.715	112.176	121.277	167.649	1	0	1	0	1	0	0	0
chr3	85888484	85888683	Intergenic	-1065	Glt28d2	2.18711	0.000808776	0.0226213	2.86237	1.12994e-05	0.00114906	2.78381	1.5119e-05	0.00119274	-0.607084	0.303544	0.529663	-0.402241	0.481442	0.660559	5.23302	5.07408	32.2963	28.0727	49.8433	51.259	61.2404	34.2749	49.0675	13.5384	47.0258	26.4709	1	0	1	0	1	0	0	0
chr11	108068565	108068764	intron (NM_011101, intron 3 of 16)	71816	Mir7223	2.50531	0.000916355	0.024539	2.85872	0.000160593	0.00770099	2.239	0.00291699	0.0521145	-1.14282	0.109577	0.268849	0.16677	0.80853	0.892663	5.9806	0	17.5591	45.2282	20.3442	60.8701	19.4856	29.5348	8.17792	25.1428	22.2754	32.7735	0	0	1	0	0	0	0	0
chr12	25350823	25351022	Intergenic	221748	Gm17746	2.18286	0.00394277	0.0659436	2.85387	0.000160724	0.00770099	1.92879	0.0103566	0.117822	-1.22945	0.082835	0.22022	-0.571453	0.413233	0.600647	5.23302	0	19.4405	21.8343	20.3442	49.6572	18.7897	14.9497	9.54091	17.4066	12.3752	9.66397	0	0	1	0	0	0	0	0
chr5	10866525	10866724	intron (NR_003596, intron 1 of 4)	1595	Gm6455	2.52113	0.000175558	0.00778494	2.85281	2.38263e-05	0.00196321	2.06189	0.00206433	0.0415123	2.26541	5.16193e-05	0.000592699	1.6825	0.00264539	0.0117849	5.23302	0	24.7709	31.1919	35.6023	35.2406	20.1815	18.9606	302.583	75.4285	59.401	76.8916	1	0	1	0	0	0	1	0
chr11	86596241	86596440	intron (NM_029478, intron 10 of 11)	-12182	Mir21a	2.41917	5.40912e-05	0.00325913	2.85273	2.03719e-06	0.000302143	2.36016	7.09997e-05	0.00394277	-0.393965	0.459759	0.676	1.50209	0.00292918	0.0128767	6.72817	5.07408	38.8809	43.6686	37.6367	76.8886	23.6611	53.9648	31.3487	54.1538	121.277	116.388	1	0	1	0	1	0	0	0
chr6	115677687	115677886	Intergenic	-1151	Raf1	3.46049	5.86764e-10	3.62605e-07	2.85079	5.96781e-07	0.000112808	2.96839	9.91802e-08	2.31072e-05	1.61214	0.000249183	0.00215381	1.49237	0.000364359	0.00206914	2.9903	6.76544	63.0247	68.6221	46.7916	36.8424	40.363	51.0478	160.832	108.308	116.327	150.422	1	0	1	0	1	0	1	0
chr4	152197722	152197921	intron (NM_001146057, intron 1 of 8)	-2023	Acot7	2.24615	3.49326e-06	0.000415758	2.8482	3.92623e-09	1.72048e-06	2.58148	7.56551e-08	1.8895e-05	-1.06	0.0203506	0.0755573	-0.51336	0.250148	0.435098	22.4272	16.9136	82.1517	132.565	102.738	227.462	138.487	131.63	87.2312	63.8241	69.3011	112.606	1	0	1	0	1	0	0	0
chr11	34036389	34036588	Intergenic	-10713	Lcp2	2.2046	0.000416974	0.0148384	2.84556	5.11248e-06	0.000616547	2.20232	0.000375745	0.0129369	0.0399885	0.943053	0.975578	1.57995	0.00369154	0.0156582	7.47575	5.07408	24.1438	54.5858	25.4302	99.3144	38.2753	37.5566	62.6974	63.8241	101.477	142.018	1	0	1	0	1	0	0	0
chr17	34179915	34180114	Intergenic	7316	Psmb9	1.54294	0.0748066	0.40513	2.83781	0.000923782	0.0271513	2.04243	0.0164614	0.156421	-1.08693	0.178804	0.378304	1.31281	0.0866948	0.205269	1.49515	1.69136	4.70334	12.4767	25.4302	20.824	2.78365	20.7837	4.08896	15.4725	29.7005	39.4962	0	0	1	0	0	0	0	0
chr4	11721473	11721672	Intergenic	17125	Gem	2.17315	0.00030869	0.0118751	2.83738	2.38775e-06	0.000344593	2.74957	3.72669e-06	0.000399187	-0.506797	0.354847	0.58184	-0.763913	0.156947	0.315058	3.73787	13.5309	39.8216	45.2282	62.0498	76.8886	53.5854	75.4778	61.3344	32.8791	19.8003	49.1602	1	0	1	0	1	0	0	0
chr14	70796089	70796288	Intergenic	21807	Dok2	2.28825	0.00201794	0.042346	2.83433	0.000131912	0.00668606	2.28609	0.00186348	0.0388005	-1.93728	0.0074017	0.0339949	-1.22841	0.0751302	0.184578	3.73787	3.38272	20.0676	29.6323	25.4302	49.6572	20.1815	28.0763	8.17792	7.73626	2.47504	13.0254	1	0	1	0	1	0	0	1
chr3	137954361	137954560	intron (NM_011932, intron 3 of 8)	27089	Dapp1	2.83108	1.25249e-09	6.70808e-07	2.83262	1.50712e-09	7.75537e-07	3.21958	3.50539e-12	4.02302e-09	1.09628	0.00899414	0.0397849	0.0890676	0.829959	0.905638	19.4369	15.2222	135.77	152.84	133.254	155.379	151.013	228.986	456.601	176	212.854	194.54	1	0	1	0	1	0	0	0
chr7	30887629	30887828	Intergenic	-7386	Cd22	1.67689	0.0202604	0.188459	2.83225	7.8288e-05	0.0046189	2.19538	0.00208072	0.0417548	-0.793451	0.240542	0.458757	0.0136496	0.983622	0.992203	7.47575	3.38272	14.7371	34.3111	33.5679	83.296	37.5793	33.1811	24.5338	38.6813	7.42512	58.8242	0	0	1	0	1	0	0	0
chr2	31081507	31081706	intron (NM_001038700, intron 6 of 14)	14894	Fnbp1	2.06286	0.00181341	0.0394529	2.83133	1.75796e-05	0.00156054	2.53259	0.000104345	0.00528321	-2.4509	0.000236162	0.00205738	-1.16647	0.0546359	0.144542	4.48545	8.4568	27.9065	35.8706	36.6195	76.8886	48.714	40.8382	5.45195	11.6044	29.7005	11.3447	1	0	1	0	1	0	0	1
chr14	64732148	64732347	intron (NM_001081177, intron 10 of 39)	79716	Kif13b	2.05496	0.000506593	0.0168048	2.83107	1.54578e-06	0.000237292	1.92383	0.00103356	0.0264999	-1.46688	0.00866696	0.0386927	-0.082729	0.877585	0.933434	6.72817	11.8395	33.5505	54.5858	54.9293	99.3144	30.6202	47.0369	31.3487	19.3406	27.2254	43.698	1	0	1	0	1	0	0	0
chr2	132613682	132613881	intron (NR_033469, intron 2 of 3)	15585	AU019990	2.58354	1.86254e-06	0.000257983	2.82798	2.12449e-07	4.85329e-05	3.15293	3.622e-09	1.57286e-06	1.45453	0.00133122	0.00851029	0.912703	0.0378589	0.108412	2.9903	13.5309	49.2283	56.1454	47.8088	78.4904	73.0709	84.9581	226.256	131.516	143.552	162.187	1	0	1	0	1	0	0	0
chr4	135108761	135108960	Intergenic	-11785	Runx3	2.12237	0.00247474	0.0481761	2.82728	5.36505e-05	0.00349941	2.2655	0.00111314	0.0278437	-2.20379	0.00152753	0.00952771	-1.04178	0.112181	0.248093	8.22332	1.69136	21.6354	42.109	33.5679	73.6849	27.8365	40.8382	4.08896	15.4725	19.8003	12.6052	1	0	1	0	1	0	0	1
chr10	115396082	115396281	intron (NM_001033261, intron 2 of 34)	11222	Zfc3h1	3.6234	5.82023e-12	7.19888e-09	2.82696	1.22553e-07	3.01392e-05	3.13625	2.37042e-09	1.12018e-06	2.14506	2.18029e-06	4.27039e-05	1.47573	0.000848202	0.00435921	12.7088	1.69136	141.727	121.648	74.2563	73.6849	75.1587	109.753	489.312	210.813	215.329	321.852	1	0	1	0	1	0	1	0
chr14	100211163	100211362	Intergenic	-61466	Klf12	3.36316	1.23572e-07	2.84996e-05	2.82636	1.1747e-05	0.00117719	2.62176	3.73083e-05	0.00241711	2.14224	8.33504e-05	0.000878176	1.26318	0.0188512	0.0619278	1.49515	8.4568	68.3552	59.2645	58.9981	25.6295	43.1466	30.9933	317.576	100.571	108.902	81.9337	1	0	1	0	1	0	1	0
chr11	110919155	110919354	Intergenic	-48779	Kcnj16	2.60116	7.76754e-05	0.00422109	2.82628	1.89567e-05	0.00165235	2.65213	4.97359e-05	0.00301556	0.355917	0.54934	0.744574	-0.220722	0.709042	0.829887	3.73787	8.4568	44.5249	48.3474	44.7572	65.6757	48.018	48.1308	118.58	23.2088	24.7504	53.3619	1	0	1	0	1	0	0	0
chr9	117892694	117892893	Intergenic	-147729	Azi2	2.27496	3.93412e-07	7.32171e-05	2.82486	3.00677e-10	2.01295e-07	2.07326	3.30472e-06	0.000367885	-2.05902	2.93718e-06	5.50031e-05	-1.49838	0.00048866	0.00268732	20.9321	18.605	106.923	102.933	129.186	184.212	90.4688	91.1568	42.2526	27.0769	24.7504	34.034	1	0	1	0	1	0	0	1
chr2	38536555	38536754	intron (NM_001159631, intron 1 of 9)	24778	Nek6	2.63342	1.74783e-07	3.81217e-05	2.82445	2.37294e-08	8.41973e-06	2.35055	2.83363e-06	0.000327546	1.79864	6.75253e-05	0.000737955	2.17871	1.06469e-06	1.18906e-05	17.1942	10.1482	95.9481	112.291	72.2219	168.194	80.0301	88.6044	631.063	245.626	368.781	450.425	1	0	1	0	1	0	1	0
chr10	81510352	81510551	intron (NM_010304, intron 4 of 6)	-10314	S1pr4	2.25235	9.81749e-07	0.000156179	2.82205	8.46266e-10	4.79903e-07	2.46189	7.19777e-08	1.80702e-05	-2.21182	1.3066e-06	2.80287e-05	-1.46072	0.00091636	0.00466326	30.6506	23.679	146.431	140.363	139.358	296.341	155.189	178.303	29.9857	58.0219	44.5507	67.6478	1	0	1	0	1	0	0	1
chr12	33220538	33220737	intron (NM_028139, intron 3 of 3)	72951	Atxn7l1	2.49917	6.71241e-05	0.0037754	2.82043	7.71066e-06	0.000842787	2.77278	7.37491e-06	0.000666952	0.330822	0.532028	0.732081	0.207724	0.68458	0.814473	4.48545	3.38272	31.6692	29.6323	39.6712	38.4443	49.4099	26.6178	58.6084	40.6153	42.0757	45.3786	1	0	1	0	1	0	0	0
chr11	106416491	106416690	intron (NM_023913, intron 10 of 21)	-33809	Icam2	1.98533	0.00562657	0.0831174	2.8138	8.28934e-05	0.00480243	2.36772	0.000859494	0.0231373	-1.37209	0.0460055	0.141751	0.413241	0.531241	0.70108	4.48545	8.4568	37.3132	26.5131	23.3958	100.916	25.7488	60.5281	8.17792	34.8132	34.6506	81.9337	0	0	1	0	1	0	0	0
chr10	19718689	19718888	intron (NM_172786, intron 1 of 6)	6201	Il20ra	2.28489	2.87831e-05	0.00200492	2.8128	2.66457e-07	5.89162e-05	2.80601	1.90997e-07	3.78461e-05	-0.889616	0.0743601	0.2036	0.145437	0.756434	0.860086	8.22332	10.1482	37.6267	68.6221	63.067	89.7033	77.2464	73.6547	49.0675	29.011	61.876	102.102	1	0	1	0	1	0	0	0
chr5	103439249	103439448	intron (NM_011204, intron 1 of 47)	14156	Ptpn13	3.293	4.81643e-11	4.14574e-08	2.81259	3.13979e-08	1.00898e-05	3.12741	3.43386e-10	2.33125e-07	0.488574	0.255553	0.476728	-0.391574	0.351402	0.542554	11.2136	5.07408	97.8295	112.291	90.5316	56.0646	89.0769	96.2615	122.669	87.0329	61.876	76.0512	1	0	1	0	1	0	0	0
chr4	151006098	151006297	intron (NM_011067, intron 20 of 20)	9100	Uts2	1.51865	0.0237064	0.2094	2.8125	2.27856e-05	0.00190349	2.53128	0.000118905	0.00574228	-0.998594	0.108477	0.267062	0.739463	0.211423	0.387476	8.22332	3.38272	19.4405	24.9535	24.413	94.5089	32.7079	61.2573	25.8968	29.011	49.5008	111.766	0	0	1	0	1	0	0	0
chr2	146197987	146198186	Intergenic	-23911	Insm1	3.64233	3.20907e-09	1.48734e-06	2.81117	7.29208e-06	0.000811762	2.06363	0.000885683	0.023665	0.944305	0.0724203	0.199851	0.791293	0.132014	0.278325	2.9903	6.76544	85.9143	68.6221	32.5507	52.8609	18.0938	29.8994	115.854	52.2197	39.6007	46.6392	1	0	1	0	0	0	0	0
chr4	6476453	6476652	Intergenic	-22281	Nsmaf	2.20478	0.00110149	0.0279269	2.80517	3.26516e-05	0.00245827	1.99036	0.00303574	0.0534827	-1.7446	0.00756653	0.034597	-1.52782	0.019088	0.0625523	6.72817	5.07408	25.0845	46.7878	34.5851	76.8886	37.5793	22.2422	13.6299	15.4725	14.8502	5.88242	1	0	1	0	0	0	0	1
chr11	86587035	86587234	intron (NM_029478, intron 10 of 11)	-2976	Mir21a	2.52604	7.46871e-07	0.000125002	2.80389	4.1302e-08	1.23655e-05	2.33147	4.63514e-06	0.000473354	-1.71578	0.000610456	0.00449515	0.815638	0.0902755	0.211482	36.6312	15.2222	178.727	174.674	140.375	294.74	166.323	140.381	25.8968	98.6373	240.079	314.709	1	0	1	0	1	0	0	1
chr6	115693484	115693683	Intergenic	-16948	Raf1	3.03669	2.15442e-05	0.00162627	2.80359	0.000103787	0.00568492	2.56227	0.00032528	0.0116921	-0.375582	0.563063	0.754791	-0.168917	0.789175	0.881183	5.23302	0	29.4743	53.0262	38.654	28.8332	13.9183	41.5675	20.4448	30.945	24.7504	24.7902	1	0	1	0	0	0	0	0
chr16	89848910	89849109	intron (NM_009384, intron 12 of 27)	-30657	Tiam1	2.07822	0.000255372	0.0103414	2.80287	7.70087e-07	0.000135474	2.58483	3.5668e-06	0.000388975	1.75706	0.000155754	0.00145808	1.61716	0.000360004	0.00204827	7.47575	3.38272	35.4318	24.9535	46.7916	59.2683	39.6671	49.9539	261.694	114.11	155.928	136.976	1	0	1	0	1	0	1	0
chr7	120699803	120700002	intron (NM_001164580, intron 1 of 2)	22282	Mosmo	2.59376	2.9276e-06	0.000359074	2.79713	5.40025e-07	0.000104539	3.05371	2.49248e-08	7.19415e-06	-0.158114	0.745842	0.873108	-1.05147	0.0285566	0.0866969	6.72817	8.4568	63.9654	42.109	66.1186	59.2683	54.2813	95.8969	61.3344	50.2857	32.1755	36.9752	1	0	1	0	1	0	0	0
chr10	39472191	39472390	intron (NM_001122893, intron 3 of 13)	102491	Fyn	3.09394	3.00552e-06	0.000367696	2.7944	3.10337e-05	0.00237066	2.84845	1.55549e-05	0.0012152	-0.154191	0.79356	0.900685	0.00568508	0.991978	0.996423	2.9903	5.07408	33.5505	62.3837	23.3958	52.8609	47.3221	30.9933	28.6227	38.6813	27.2254	48.3199	1	0	1	0	1	0	0	0
chr17	29065344	29065543	intron (NR_036469, intron 1 of 1)	13683	Trp53cor1	2.35521	0.000128471	0.00615561	2.79016	5.95218e-06	0.000688027	1.93883	0.00154667	0.0344514	0.268508	0.624153	0.79812	2.12713	6.74082e-05	0.000468456	9.71847	1.69136	50.169	32.7515	30.5163	88.1015	31.3161	30.6287	43.6156	100.571	143.552	155.884	1	0	1	0	1	0	0	0
chr4	133677352	133677551	Intergenic	-4804	Pigv	1.68263	0.0122095	0.136771	2.78498	3.04478e-05	0.00233701	2.30215	0.000531352	0.0163343	-2.44436	0.000277903	0.00235447	-1.97865	0.00262718	0.0117157	12.7088	8.4568	27.9065	56.1454	50.8605	140.962	57.7608	73.6547	2.72597	27.0769	7.42512	18.4876	0	0	1	0	1	0	0	1
chr9	69304418	69304617	intron (NM_001289916, intron 1 of 9)	14676	Rora	2.8048	6.0335e-06	0.000608424	2.78371	8.52988e-06	0.000919815	3.03067	8.02938e-07	0.000121708	0.811592	0.131111	0.305403	1.34795	0.00901887	0.0335904	3.73787	6.76544	53.9316	38.9898	28.4819	65.6757	28.5325	81.6765	95.4091	73.4944	123.752	174.792	1	0	1	0	1	0	0	0
chr16	58701990	58702189	Intergenic	16635	Gpr15	2.70019	3.97774e-07	7.37443e-05	2.77969	2.02975e-07	4.65896e-05	3.2053	1.34055e-09	6.87419e-07	0.648552	0.183828	0.385357	-0.791264	0.103755	0.234456	10.466	18.605	98.4566	116.97	129.186	97.7126	152.405	157.884	282.138	81.2307	59.401	110.085	1	0	1	0	1	0	0	0
chr9	42208677	42208876	intron (NR_040754, intron 1 of 6)	455	4930546K05Rik	1.05314	0.0937426	0.458572	2.77731	5.99406e-06	0.00069121	2.29708	0.000155393	0.00689711	-0.492294	0.375746	0.601858	1.04607	0.0489341	0.132833	8.9709	3.38272	16.3049	15.5959	36.6195	81.6941	39.6671	41.9321	47.7045	32.8791	54.4509	118.069	0	0	1	0	1	0	0	0
chr3	100436900	100437099	intron (NR_040543, intron 2 of 2)	10594	4930406D18Rik	2.34026	3.1948e-06	0.000385955	2.77312	3.49258e-08	1.07916e-05	2.5326	3.9114e-07	7.00882e-05	0.327719	0.482933	0.694523	1.05484	0.0218834	0.0699115	26.1651	11.8395	111.312	118.529	83.4112	233.869	102.995	160.436	253.516	145.055	242.554	324.373	1	0	1	0	1	0	0	0
chr6	125067744	125067943	promoter-TSS (NM_001163269)	-77	Lpar5	2.1057	1.85431e-06	0.000257584	2.77111	3.27111e-10	2.15954e-07	2.28649	1.70663e-07	3.45643e-05	-0.481735	0.234783	0.451741	0.524751	0.183744	0.351504	20.9321	21.9877	104.728	95.1352	112.91	213.045	112.738	115.587	124.032	104.439	128.702	199.162	1	0	1	0	1	0	0	0
chr8	25948950	25949149	intron (NM_029884, intron 14 of 17)	27695	Hgsnat	2.1523	4.66772e-05	0.00287716	2.76958	1.57569e-07	3.74145e-05	2.30188	1.18944e-05	0.000988506	-1.0084	0.0468786	0.143791	-0.629563	0.210517	0.386373	10.466	37.2099	93.7532	132.565	132.237	222.656	130.832	119.962	124.032	42.5494	76.7263	80.6731	1	0	1	0	1	0	0	0
chr11	83537106	83537305	Intergenic	-6687	Ccl5	1.54941	0.0377434	0.276495	2.76634	0.000183351	0.00849796	1.95043	0.00806021	0.100652	-2.05752	0.00493472	0.0245752	0.137916	0.841128	0.912476	2.9903	8.4568	15.3642	24.9535	21.3614	81.6941	18.7897	34.6396	8.17792	11.6044	12.3752	44.1181	0	0	1	0	0	0	0	1
chr8	34141049	34141248	intron (NM_026609, intron 1 of 3)	5591	Leprotl1	2.92998	1.31443e-08	4.76819e-06	2.76444	1.08903e-07	2.70586e-05	2.86507	2.24294e-08	6.71516e-06	1.19804	0.00760821	0.0347547	0.701311	0.110986	0.246299	9.71847	10.1482	84.3466	98.2544	88.4972	72.083	88.381	84.9581	275.323	106.374	111.377	172.691	1	0	1	0	1	0	0	0
chr8	83758429	83758628	Intergenic	-17217	Adgre5	1.43688	0.00864946	0.110238	2.76196	3.27543e-07	7.04831e-05	1.57736	0.00348992	0.058471	-1.65044	0.0015666	0.00971983	0.347381	0.486744	0.664797	8.22332	20.2963	31.3556	49.907	76.2907	134.555	41.7548	45.943	25.8968	36.7472	47.0258	64.2864	0	0	1	0	0	0	0	1
chr12	76537570	76537769	intron (NM_153804, intron 1 of 18)	4109	Plekhg3	2.31097	0.000245207	0.0100207	2.76179	1.20852e-05	0.00119862	2.32166	0.000203706	0.00834954	-1.24564	0.0361197	0.118029	-1.30728	0.0264811	0.0816611	5.9806	8.4568	32.6098	54.5858	40.6884	80.0923	30.6202	54.6941	14.9929	32.8791	17.3253	15.1262	1	0	1	0	1	0	0	0
chr11	97104193	97104392	intron (NM_019507, intron 1 of 5)	11039	Tbx21	2.39185	0.000355998	0.0131749	2.7616	3.94173e-05	0.00283996	2.54684	0.000123831	0.00590981	-0.277193	0.647989	0.814452	1.13808	0.0497303	0.134465	6.72817	1.69136	33.2369	34.3111	26.4474	64.0738	22.9652	52.1417	17.7188	56.0879	84.1514	93.6985	1	0	1	0	1	0	0	0
chr10	118550320	118550519	intron (NR_104123, intron 1 of 4)	6106	Ifngas1	1.65894	0.00277376	0.0522881	2.76072	5.02356e-07	9.9105e-05	2.5111	3.71272e-06	0.000398575	-1.78387	0.000777172	0.00547759	-0.681363	0.165399	0.32704	9.71847	10.1482	31.042	40.5494	76.2907	81.6941	80.726	51.0478	25.8968	15.4725	29.7005	47.0593	0	0	1	0	1	0	0	1
chr5	21043775	21043974	intron (NM_011203, intron 1 of 17)	11923	Ptpn12	1.06158	0.150429	0.577075	2.75978	0.000146007	0.0072183	2.57016	0.000364236	0.0126673	-1.26414	0.0701341	0.195129	-1.4244	0.0394073	0.112013	4.48545	8.4568	17.5591	12.4767	30.5163	86.4996	55.6731	44.1199	32.7117	9.67032	2.47504	26.0507	0	0	1	0	1	0	0	0
chr3	142550434	142550633	TTS (NM_001083312)	-9519	Gbp3	2.82987	2.94397e-05	0.00203594	2.75647	5.68517e-05	0.00365386	2.73947	4.62607e-05	0.0028442	2.36486	3.34525e-05	0.000414305	1.69922	0.00227027	0.0103257	3.73787	1.69136	42.9572	21.8343	35.6023	27.2314	32.7079	29.8994	302.583	63.8241	106.427	115.547	1	0	1	0	1	0	1	0
chr9	96714173	96714372	intron (NM_175537, intron 2 of 2)	17403	Zbtb38	2.2426	4.80691e-05	0.00295539	2.75599	6.07533e-07	0.000113505	2.69469	7.16575e-07	0.000113247	2.11517	5.54314e-06	9.38497e-05	1.98313	1.28757e-05	0.000107283	8.9709	5.07408	35.4318	53.0262	39.6712	88.1015	47.3221	72.5608	391.177	193.406	222.754	284.457	1	0	1	0	1	0	1	0
chr17	47123625	47123824	Intergenic	-17218	Trerf1	3.32666	4.99273e-06	0.000531257	2.75478	0.000205912	0.0092958	2.87657	7.51203e-05	0.00413	0.418572	0.507453	0.713033	1.29021	0.0296667	0.0893131	2.9903	0	21.6354	51.4666	20.3442	25.6295	32.7079	17.8667	17.7188	46.4175	64.3511	68.068	1	0	1	0	0	0	0	0
chrX	101734039	101734238	promoter-TSS (NM_009910)	9	Cxcr3	2.46017	4.75107e-06	0.000513774	2.75417	3.31468e-07	7.10107e-05	2.32092	1.39805e-05	0.0011269	-1.73397	0.00087118	0.00602218	-0.567083	0.245792	0.430073	14.2039	6.76544	66.4739	76.4201	57.9809	120.138	59.1527	68.9145	27.2597	21.2747	34.6506	47.8997	1	0	1	0	1	0	0	1
chr19	29717961	29718160	exon (NM_172836, exon 8 of 8)	20119	Mlana	2.2246	0.00475306	0.0747983	2.74754	0.000490269	0.017237	3.00781	0.00011445	0.00561313	-2.0259	0.00939415	0.0412402	-1.21252	0.0980154	0.224753	1.49515	6.76544	19.754	32.7515	24.413	54.4627	25.7488	68.9145	0	15.4725	12.3752	22.6893	0	0	1	0	1	0	0	1
chrX	101735080	101735279	Intergenic	-1032	Cxcr3	2.16058	0.000988425	0.0259076	2.74496	2.85717e-05	0.00223937	1.98455	0.0022896	0.044394	-1.01218	0.0947371	0.242461	-0.610639	0.306305	0.497373	7.47575	1.69136	28.8471	29.6323	42.7228	48.0554	27.1406	24.0654	24.5338	17.4066	9.90016	19.7481	1	0	1	0	1	0	0	0
chr5	29738154	29738353	intron (NM_011847, intron 1 of 7)	-2317	Gm5129	1.98164	0.000842381	0.0231893	2.74143	3.65563e-06	0.000476239	2.25082	0.000129393	0.00612073	-2.26511	0.000133652	0.00128749	-2.0961	0.000326063	0.00187714	17.1942	5.07408	41.0758	70.1817	55.9465	137.759	62.6322	70.373	12.2669	23.2088	12.3752	14.2859	1	0	1	0	1	0	0	1
chr7	117394136	117394335	intron (NM_175645, intron 1 of 11)	13256	Xylt1	2.24858	1.09118e-06	0.000168163	2.74127	2.88574e-09	1.35047e-06	2.91177	1.652e-10	1.1885e-07	0.377212	0.36318	0.590104	0.477134	0.238623	0.421325	15.6991	20.2963	109.117	74.8605	96.6349	171.397	118.305	181.584	212.626	135.384	207.903	215.969	1	0	1	0	1	0	0	0
chr1	155201371	155201570	intron (NM_021433, intron 7 of 7)	42767	Stx6	3.83041	1.14754e-13	2.30474e-10	2.73794	1.87137e-07	4.37882e-05	2.00695	0.000116428	0.00566756	1.60432	0.000353766	0.00287801	2.49888	1.56733e-08	2.81163e-07	7.47575	11.8395	139.846	191.83	84.4284	64.0738	59.1527	29.5348	323.028	152.791	306.905	233.616	1	0	1	0	1	0	1	0
chr6	120453248	120453447	Intergenic	-9850	Il17ra	1.88707	0.000980117	0.0257739	2.73721	1.55342e-06	0.000237708	1.95788	0.000530899	0.0163308	0.617651	0.211225	0.421575	2.11143	1.14311e-05	9.67684e-05	6.72817	8.4568	26.6523	40.5494	34.5851	89.7033	26.4447	41.9321	110.402	81.2307	143.552	177.733	1	0	1	0	1	0	0	0
chr11	33706886	33707085	intron (NM_001190885, intron 1 of 8)	-128028	Gabrp	0.837083	0.252873	0.724269	2.73496	0.000133887	0.0067577	2.25467	0.00151524	0.034082	-2.079	0.00342657	0.0183744	-1.44298	0.0352476	0.102504	6.72817	5.07408	14.4236	9.35756	37.6367	70.4812	43.1466	30.9933	2.72597	19.3406	19.8003	7.14293	0	0	1	0	1	0	0	1
chr15	102743275	102743474	Intergenic	3535	Gm38436	2.97764	2.33464e-08	7.54786e-06	2.73174	4.67921e-07	9.3978e-05	1.86421	0.000513275	0.0159208	1.47593	0.000603809	0.00445232	3.37024	5.18613e-16	6.56121e-14	8.22332	1.69136	60.8299	54.5858	37.6367	60.8701	31.3161	21.1484	139.025	143.121	254.929	329.836	1	0	1	0	1	0	0	0
chr7	43436971	43437170	promoter-TSS (NM_024253)	-68	Nkg7	1.82579	0.0028994	0.0538977	2.72992	7.64243e-06	0.000837229	1.77553	0.00346979	0.0582966	-0.654427	0.247872	0.467796	0.604425	0.276059	0.464537	11.2136	5.07408	36.686	35.8706	50.8605	92.907	33.4039	36.4627	55.8825	30.945	24.7504	79.4126	0	0	1	0	0	0	0	0
chr2	168580265	168580464	intron (NM_001291168, intron 1 of 9)	10001	Nfatc2	2.70104	1.62935e-05	0.00131997	2.72814	1.50593e-05	0.00139626	2.74549	1.03947e-05	0.000875957	-0.410678	0.478678	0.690982	0.124047	0.824929	0.902599	9.71847	3.38272	57.6943	62.3837	50.8605	72.083	27.8365	94.803	32.7117	58.0219	44.5507	87.8161	1	0	1	0	1	0	0	0
chr19	60212734	60212933	intron (NM_029648, intron 5 of 7)	13864	Fam204a	1.57187	0.0513782	0.329413	2.72706	0.000654327	0.0212648	1.99278	0.0122358	0.13007	-2.2202	0.0055623	0.0270276	-2.65496	0.00118139	0.00583517	1.49515	6.76544	10.6609	18.7151	20.3442	51.259	17.3978	21.8776	4.08896	7.73626	0	2.52104	0	0	1	0	0	0	0	1
chr10	51490796	51490995	promoter-TSS (NM_013532)	-3	Lilrb4a	2.38932	0.000118655	0.00581831	2.72449	1.21299e-05	0.00120058	3.18813	1.97411e-07	3.88392e-05	0.189499	0.734813	0.866234	-0.545803	0.319121	0.510708	8.9709	3.38272	36.3725	54.5858	46.7916	68.8793	62.6322	98.8139	103.587	27.0769	44.5507	61.7654	1	0	1	0	1	0	0	0
chr8	11464159	11464358	intron (NM_011227, intron 1 of 1)	-13671	E230013L22Rik	0.961477	0.122441	0.524723	2.71685	8.52358e-06	0.000919815	2.75441	5.10036e-06	0.000500708	0.509023	0.362653	0.589752	1.24945	0.0223076	0.0709729	14.9515	1.69136	27.9065	10.9172	35.6023	121.74	68.1995	91.1568	137.662	88.967	168.303	234.036	0	0	1	0	1	0	0	0
chr13	51598176	51598375	Intergenic	-31191	Shc3	2.53594	0.000286944	0.0112305	2.71517	0.000112584	0.00598321	2.92429	2.38171e-05	0.00171126	-1.32346	0.0466145	0.14317	-1.9489	0.00271715	0.0120634	3.73787	5.07408	24.1438	45.2282	37.6367	40.0461	51.4976	39.0151	4.08896	25.1428	9.90016	10.0841	1	0	1	0	1	0	0	0
chr9	95959830	95960029	intron (NM_011916, intron 1 of 41)	5169	Xrn1	2.18569	0.000211297	0.00892633	2.71203	4.32667e-06	0.000534754	2.71555	3.13741e-06	0.000356673	-1.18658	0.0326581	0.109076	-1.30623	0.0156213	0.053001	11.2136	5.07408	35.4318	60.8241	51.8777	88.1015	52.1935	86.052	35.4377	21.2747	19.8003	30.6726	1	0	1	0	1	0	0	0
chr6	97016151	97016350	intron (NM_177233, intron 2 of 5)	44161	Fam19a4	2.17808	5.86956e-05	0.00345873	2.71045	5.77327e-07	0.000110281	2.86419	8.70436e-08	2.0874e-05	-1.24002	0.015592	0.0616492	-2.55557	1.04542e-06	1.16945e-05	13.4563	10.1482	62.3976	62.3837	79.3423	105.722	86.2933	118.868	53.1565	19.3406	22.2754	11.7648	1	0	1	0	1	0	0	0
chr6	108324565	108324764	intron (NM_010585, intron 4 of 61)	111568	Itpr1	3.13756	3.96798e-08	1.15918e-05	2.71004	3.02929e-06	0.000416005	3.09691	4.8329e-08	1.28705e-05	0.922352	0.0581678	0.169384	0.133337	0.777469	0.874066	8.22332	1.69136	76.5077	53.0262	43.74	52.8609	59.8486	67.456	125.395	61.8901	79.2013	63.4461	1	0	1	0	1	0	0	0
chr2	70727175	70727374	intron (NM_172664, intron 12 of 19)	65765	Gorasp2	2.56823	0.000225575	0.00938149	2.70902	0.00011103	0.00592022	2.92199	2.22e-05	0.00161889	-2.24554	0.00144912	0.0091177	-2.96399	1.40979e-05	0.000116182	1.49515	8.4568	33.5505	32.7515	41.7056	32.0369	38.9712	47.0369	8.17792	3.86813	4.95008	3.78155	1	0	1	0	1	0	0	1
chr5	135152574	135152773	intron (NM_013763, intron 1 of 6)	2962	Tbl2	1.76939	0.00669126	0.0923631	2.70846	3.03296e-05	0.00233701	1.76309	0.00643309	0.086908	-2.28314	0.000465384	0.00360788	-0.117266	0.847518	0.916545	10.466	6.76544	37.3132	34.3111	32.5507	115.333	21.5733	49.2247	8.17792	17.4066	32.1755	33.1936	0	0	1	0	0	0	0	1
chr2	152372175	152372374	intron (NR_033505, intron 4 of 4)	4292	Nrsn2	1.86675	0.0010527	0.0270918	2.70416	1.88054e-06	0.000283268	2.63986	2.44877e-06	0.000294353	-2.92762	1.3757e-06	2.92896e-05	-1.88353	0.000417015	0.00233271	8.9709	11.8395	36.686	48.3474	75.2735	80.0923	60.5445	86.4166	5.45195	11.6044	9.90016	23.1095	1	0	1	0	1	0	0	1
chr13	85724778	85724977	Intergenic	321918	Cox7c	3.11443	1.08812e-08	4.22978e-06	2.70412	8.71824e-07	0.000150623	2.36271	1.43919e-05	0.00115427	1.5922	0.00124708	0.00807955	0.676873	0.169308	0.332179	8.9709	15.2222	119.465	127.887	125.117	56.0646	86.9892	55.7879	437.519	146.989	96.5266	134.875	1	0	1	0	1	0	1	0
chr8	128645580	128645779	Intergenic	-39975	Itgb1	2.07392	0.000275766	0.0109134	2.70411	2.08057e-06	0.000305756	2.37497	2.3787e-05	0.00171126	-0.0192062	0.969423	0.987557	0.204181	0.67589	0.808922	6.72817	8.4568	29.4743	46.7878	43.74	75.2867	48.018	44.4845	70.8753	44.4835	47.0258	58.8242	1	0	1	0	1	0	0	0
chr12	110381437	110381636	Intergenic	-65643	Ppp2r5c	2.56806	2.6434e-05	0.00188117	2.69844	1.25005e-05	0.00122221	2.18595	0.000322283	0.0116278	1.38239	0.00550948	0.0268376	2.37285	7.21342e-07	8.3925e-06	5.23302	1.69136	33.2369	29.6323	41.7056	27.2314	32.7079	16.0436	100.861	90.901	111.377	156.724	1	0	1	0	0	0	0	0
chr6	50394017	50394216	intron (NM_001347213, intron 2 of 23)	-11279	Osbpl3	2.90089	7.60462e-07	0.000126837	2.69422	6.0507e-06	0.000696076	2.61233	7.50563e-06	0.000676236	1.14454	0.0191451	0.0721164	2.07307	7.99777e-06	7.06447e-05	4.48545	5.07408	39.8216	56.1454	26.4474	56.0646	31.3161	44.4845	119.943	65.7582	160.878	183.195	1	0	1	0	1	0	0	0
chr12	118372026	118372225	Intergenic	-70685	Sp4	1.64509	0.00880313	0.111402	2.69306	1.51191e-05	0.00139879	2.62682	1.79791e-05	0.00136048	0.331669	0.54291	0.740119	0.584678	0.267794	0.455344	5.9806	5.07408	21.3218	21.8343	31.5335	64.0738	34.7957	54.3294	84.5052	34.8132	59.401	77.3118	0	0	1	0	1	0	0	0
chr12	104066456	104066655	Intergenic	-11404	Serpina4-ps1	2.70601	6.56965e-05	0.00372115	2.69187	8.28642e-05	0.00480243	2.79626	3.20454e-05	0.00214535	-0.168997	0.782335	0.89382	-0.582173	0.329547	0.521087	6.72817	0	36.0589	38.9898	25.4302	49.6572	30.6202	48.86	44.9786	19.3406	27.2254	24.7902	1	0	1	0	1	0	0	0
chr6	114656957	114657156	intron (NM_001253718, intron 2 of 19)	13959	Atg7	2.97342	4.58942e-10	3.07249e-07	2.68994	2.28699e-08	8.22667e-06	2.83897	2.27613e-09	1.08628e-06	-0.649573	0.144282	0.325746	-0.905151	0.0374387	0.10752	17.1942	15.2222	127.304	168.436	102.738	137.759	121.785	144.392	99.4981	48.3516	47.0258	86.1354	1	0	1	0	1	0	0	0
chr6	54775861	54776060	Intergenic	-40956	Znrf2	0.892097	0.16088	0.595694	2.6864	1.77146e-05	0.00156675	1.96185	0.00164487	0.0357789	-1.16102	0.0542329	0.160741	-0.330173	0.578724	0.737569	10.466	15.2222	23.5167	28.0727	40.6884	160.185	55.6731	59.4342	36.8007	46.4175	17.3253	67.2276	0	0	1	0	1	0	0	0
chr6	135362661	135362860	promoter-TSS (NM_001288628)	-171	Emp1	2.42383	5.00803e-07	8.87488e-05	2.68528	2.74235e-08	9.24381e-06	2.61693	4.91112e-08	1.29358e-05	0.955084	0.0347285	0.114335	0.753481	0.0931505	0.21643	31.3981	20.2963	182.176	135.685	144.444	243.48	152.405	214.765	583.358	187.604	287.105	347.063	1	0	1	0	1	0	0	0
chr1	182383148	182383347	Intergenic	-25920	Trp53bp2	2.77575	3.99294e-05	0.00256356	2.68433	8.73813e-05	0.00498456	3.05312	4.90534e-06	0.000485518	-0.415786	0.490635	0.700541	-0.827599	0.149032	0.303337	5.23302	0	32.6098	31.1919	29.4991	30.4351	34.7957	43.3906	25.8968	17.4066	24.7504	18.9078	1	0	1	0	1	0	0	0
chr10	44821664	44821863	Intergenic	-245451	Prep	3.13857	5.60228e-06	0.000577989	2.68354	0.000130942	0.00666719	2.09491	0.00251997	0.0475783	-0.22581	0.717005	0.85568	0.513205	0.394478	0.583966	2.24272	5.07408	31.6692	57.705	24.413	38.4443	18.0938	21.513	27.2597	25.1428	14.8502	39.9164	1	0	1	0	0	0	0	0
chr5	122645424	122645623	intron (NM_001038845, intron 1 of 12)	1612	P2rx7	1.87282	0.00240152	0.0473301	2.68063	1.33063e-05	0.00129052	2.03328	0.000910793	0.0241707	-2.06561	0.000743112	0.00528078	-0.37897	0.519773	0.692748	23.9224	5.07408	52.3638	81.0989	63.067	181.009	68.8955	79.8533	10.9039	40.6153	39.6007	69.7487	1	0	1	0	1	0	0	1
chrX	159899060	159899259	intron (NM_001135728, intron 3 of 12)	-43534	Sh3kbp1	2.84039	4.03625e-05	0.00257024	2.67622	0.000140053	0.0070248	2.6584	0.000108626	0.00539794	1.12584	0.0507235	0.152639	0.926118	0.0944544	0.218757	3.73787	0	28.8471	24.9535	25.4302	22.4258	23.6611	23.7008	73.6013	36.7472	61.876	36.1348	1	0	1	0	1	0	0	0
chr17	86852708	86852907	Intergenic	-64541	Tmem247	2.16491	0.000423284	0.0150134	2.67496	1.43089e-05	0.00134711	2.44252	5.17209e-05	0.00311857	2.8603	2.87888e-09	1.70686e-07	2.90969	3.47547e-10	9.54012e-09	3.73787	3.38272	18.4998	28.0727	27.4646	38.4443	20.1815	34.2749	366.644	154.725	240.079	219.33	0	0	1	0	1	0	1	0
chr3	115692519	115692718	Intergenic	22437	S1pr1	2.10908	0.000557108	0.0177369	2.67159	1.22896e-05	0.00121016	2.87001	1.90595e-06	0.000238553	0.280127	0.612151	0.789926	-0.834973	0.129325	0.274594	7.47575	8.4568	34.4912	49.907	42.7228	84.8978	57.0649	88.6044	111.765	42.5494	22.2754	52.1014	1	0	1	0	1	0	0	0
chr18	23844991	23845190	intron (NM_153058, intron 2 of 6)	41120	Mapre2	2.9875	7.62673e-10	4.48321e-07	2.66812	6.36182e-08	1.74234e-05	2.41442	6.24948e-07	0.000102156	1.88866	2.61234e-06	4.97314e-05	1.99964	2.97446e-07	3.84693e-06	11.2136	5.07408	88.1092	79.5393	75.2735	57.6664	61.2404	50.6832	325.754	191.472	254.929	215.969	1	0	1	0	1	0	1	0
chr5	103519152	103519351	intron (NM_011204, intron 9 of 47)	94059	Ptpn13	3.15629	3.65475e-07	6.94225e-05	2.65619	2.87542e-05	0.00225002	2.80382	5.62313e-06	0.000539932	2.602	1.17275e-07	3.82727e-06	2.08204	8.49259e-06	7.45239e-05	3.73787	1.69136	38.5674	43.6686	34.5851	20.824	31.3161	31.7226	258.968	116.044	113.852	170.17	1	0	1	0	1	0	1	0
chr7	3451237	3451436	Intergenic	26674	Cacng6	2.06877	0.00137358	0.0324238	2.65547	4.07557e-05	0.00290607	1.9618	0.0021515	0.0426425	1.82259	0.000617079	0.00453421	1.97549	0.000164946	0.00102962	2.9903	5.07408	21.0082	21.8343	25.4302	41.648	17.3978	21.8776	184.003	67.6922	71.7762	96.6397	1	0	1	0	0	0	1	0
chr10	12607319	12607518	intron (NM_011682, intron 50 of 73)	254317	Utrn	1.55351	0.0215532	0.196205	2.655	7.21282e-05	0.00436226	2.76343	2.53359e-05	0.00179068	-0.0769592	0.896166	0.95305	0.386229	0.490017	0.66795	4.48545	3.38272	18.1862	10.9172	30.5163	40.0461	24.357	50.6832	24.5338	42.5494	42.0757	57.5637	0	0	1	0	1	0	0	0
chr5	135538119	135538318	intron (NM_146001, intron 1 of 30)	6904	Hip1	2.27571	0.000139135	0.00653662	2.65265	9.91502e-06	0.00104123	1.6537	0.00555275	0.079164	1.09294	0.0294563	0.10082	2.80855	9.65964e-09	1.82809e-07	5.23302	5.07408	24.1438	42.109	29.4991	56.0646	17.3978	22.6069	96.7721	90.901	106.427	203.784	1	0	1	0	0	0	0	0
chr3	138867262	138867461	intron (NM_019571, intron 1 of 7)	125153	Tspan5	2.39311	0.000515042	0.0169166	2.64784	0.000141434	0.007072	2.412	0.000394836	0.0133745	1.77376	0.00139794	0.00885345	1.5579	0.00367249	0.0155911	0.747575	5.07408	16.932	21.8343	23.3958	22.4258	26.4447	12.7619	96.7721	73.4944	66.8261	56.7233	0	0	1	0	0	0	1	0
chr5	150223619	150223818	Intergenic	-36212	Fry	1.3473	0.0197996	0.18606	2.64265	3.63972e-06	0.000475452	2.55294	5.84561e-06	0.000554665	-0.267419	0.607598	0.786536	-0.346178	0.497629	0.67434	8.22332	11.8395	28.8471	26.5131	73.2391	72.083	54.2813	80.9472	88.5942	29.011	42.0757	60.925	0	0	1	0	1	0	0	0
chr12	69510850	69511049	Intergenic	-35399	5830428M24Rik	2.23207	4.29693e-05	0.00270393	2.63508	1.48753e-06	0.000230553	2.3504	1.31043e-05	0.00106954	1.69551	0.000263229	0.00225167	2.41072	9.46861e-08	1.40519e-06	7.47575	8.4568	45.4656	43.6686	48.826	72.083	38.9712	57.9757	282.138	127.648	193.053	362.609	1	0	1	0	1	0	1	0
chr2	102948549	102948748	Intergenic	-46983	Cd44	2.47703	4.18381e-06	0.000475633	2.62539	1.33459e-06	0.000211451	2.87601	6.01018e-08	1.54921e-05	1.20419	0.00782031	0.0355416	0.982601	0.0238957	0.0750714	5.23302	10.1482	39.5081	59.2645	45.7744	62.472	57.7608	70.7376	164.921	90.901	126.227	135.716	1	0	1	0	1	0	0	0
chr7	141059049	141059248	Intergenic	-2126	B4galnt4	2.81117	1.77544e-09	9.00837e-07	2.62492	2.73474e-08	9.24381e-06	2.64746	1.20133e-08	3.88635e-06	-0.573005	0.180003	0.379743	0.386671	0.336513	0.527827	11.2136	16.9136	95.6346	121.648	70.1874	120.138	93.2524	98.0847	62.6974	61.8901	108.902	141.178	1	0	1	0	1	0	0	0
chr19	5726988	5727187	promoter-TSS (NM_001114597)	-770	Ehbp1l1	2.51184	3.11959e-06	0.000378766	2.61818	1.27106e-06	0.000204226	2.1716	5.29491e-05	0.00316657	-2.15222	6.95633e-05	0.000757418	-0.38946	0.445959	0.630292	23.1748	15.2222	115.389	143.483	62.0498	219.453	77.9423	122.15	21.8078	34.8132	59.401	88.6564	1	0	1	0	1	0	0	1
chr10	111234601	111234800	intron (NM_175489, intron 4 of 23)	-63979	Bbs10	3.19969	8.14469e-09	3.32704e-06	2.61579	3.4271e-06	0.000457599	2.58168	3.18961e-06	0.000360059	2.30924	1.71295e-06	3.50159e-05	1.82148	0.000116615	0.000761321	8.22332	6.76544	108.49	70.1817	60.0153	57.6664	53.5854	61.2573	496.127	137.319	210.378	224.372	1	0	1	0	1	0	1	0
chr2	90564577	90564776	intron (NM_008982, intron 1 of 23)	15971	Ptprj	1.64222	0.0114291	0.131578	2.61496	5.1052e-05	0.00336636	2.75183	1.61091e-05	0.00124438	-1.21499	0.0493238	0.1495	-1.66843	0.00609145	0.0240318	11.9612	3.38272	25.398	37.4302	35.6023	94.5089	57.0649	84.5935	13.6299	38.6813	14.8502	23.5297	0	0	1	0	1	0	0	0
chr6	122533055	122533254	Intergenic	19478	Mfap5	2.96436	4.16471e-09	1.84172e-06	2.61396	2.85552e-07	6.285e-05	2.82506	1.85044e-08	5.71762e-06	0.0348408	0.940154	0.973963	-0.697649	0.128126	0.272813	13.4563	15.2222	142.041	115.41	124.1	75.2867	116.218	117.41	151.292	52.2197	66.8261	73.11	1	0	1	0	1	0	0	0
chr16	76337066	76337265	intron (NM_173440, intron 2 of 3)	35884	Nrip1	2.19569	1.02554e-06	0.00016102	2.61276	6.4439e-09	2.63228e-06	2.73138	7.8387e-10	4.60782e-07	-0.31014	0.454126	0.671371	-1.1664	0.00471775	0.0193289	24.67	15.2222	124.795	79.5393	160.719	118.537	123.177	180.855	126.758	96.7032	64.3511	66.8074	1	0	1	0	1	0	0	0
chr3	103857460	103857659	Intergenic	-2236	Ptpn22	2.25905	6.86131e-06	0.000664114	2.6108	2.21595e-07	5.03837e-05	2.41557	1.17224e-06	0.000163781	-1.01411	0.0305438	0.103645	0.01504	0.972809	0.98648	12.7088	11.8395	51.1096	85.7776	74.2563	99.3144	77.2464	72.5608	31.3487	52.2197	84.1514	69.3285	1	0	1	0	1	0	0	0
chr13	113829157	113829356	intron (NM_172595, intron 1 of 4)	34748	Arl15	1.66352	0.00844378	0.108564	2.60986	3.23956e-05	0.00245139	2.41346	0.000102152	0.00517765	0.426818	0.455877	0.672754	-0.170144	0.765367	0.866056	5.23302	11.8395	29.4743	31.1919	45.7744	78.4904	33.4039	72.1962	129.484	38.6813	37.1256	54.6224	0	0	1	0	1	0	0	0
chr11	100904990	100905189	intron (NM_213660, intron 7 of 23)	34451	Stat3	2.14279	0.000152232	0.00697397	2.60812	4.1633e-06	0.000521245	2.18152	9.96413e-05	0.00508783	-0.022289	0.965388	0.985686	1.20705	0.0151227	0.0515664	12.7088	5.07408	43.5843	57.705	60.0153	81.6941	54.9772	48.1308	32.7117	108.308	113.852	134.875	1	0	1	0	1	0	0	0
chr13	112341918	112342117	intron (NM_001168403, intron 6 of 11)	53499	Ankrd55	1.66918	0.0244001	0.213145	2.60677	0.000406722	0.0151756	2.6804	0.00022548	0.00894535	-1.42918	0.043859	0.136888	-1.21651	0.0717398	0.178112	6.72817	0	17.5591	15.5959	29.4991	40.0461	32.012	40.4736	4.08896	19.3406	17.3253	12.185	0	0	1	0	1	0	0	0
chr9	69336188	69336387	intron (NM_001289916, intron 1 of 9)	27960	Gm15511	2.1755	0.000230115	0.00953646	2.6056	1.06075e-05	0.00109721	2.71239	3.39651e-06	0.000374642	-1.66098	0.00393252	0.0205191	-1.30264	0.0171104	0.0572033	5.9806	15.2222	46.4063	59.2645	35.6023	110.527	80.0301	75.4778	21.8078	19.3406	32.1755	27.7314	1	0	1	0	1	0	0	1
chr7	19325844	19326043	Intergenic	-15898	Fosb	2.36157	6.90233e-05	0.00384632	2.60425	1.37548e-05	0.00131811	1.86017	0.00165165	0.0358455	0.583774	0.23755	0.45515	2.50803	7.99502e-08	1.20543e-06	5.23302	3.38272	25.7116	35.8706	26.4474	46.4535	19.4856	21.8776	50.4305	59.956	126.227	131.514	1	0	1	0	0	0	0	0
chr12	40253360	40253559	Intergenic	30095	Gm7008	2.10541	0.000497801	0.0166244	2.60222	1.74077e-05	0.00155099	2.96658	5.80556e-07	9.68303e-05	0.0875872	0.870062	0.940351	-0.596987	0.251596	0.436584	3.73787	10.1482	26.0251	42.109	44.7572	51.259	55.6731	68.9145	68.1494	32.8791	32.1755	46.219	1	0	1	0	1	0	0	0
chr2	143838792	143838991	intron (NM_009751, intron 5 of 7)	24282	Bfsp1	1.89126	0.00229196	0.0459555	2.60092	2.64166e-05	0.00209774	2.57361	2.29816e-05	0.00166581	-0.823944	0.145608	0.327972	-1.19708	0.0299549	0.0899955	7.47575	3.38272	21.3218	32.7515	39.6712	49.6572	45.2344	41.5675	23.1708	25.1428	17.3253	18.0674	1	0	1	0	1	0	0	0
chr18	39010585	39010784	intron (NM_175164, intron 1 of 22)	17539	Arhgap26	2.66003	6.49352e-05	0.00368735	2.60035	0.000122266	0.00638203	2.44139	0.000220168	0.00878522	1.75238	0.00111431	0.00735677	2.09548	4.15793e-05	0.000305799	2.9903	1.69136	21.0082	29.6323	20.3442	27.2314	21.5733	20.4191	119.943	50.2857	86.6264	107.984	1	0	1	0	1	0	1	0
chr15	78510867	78511066	Intergenic	-15900	Il2rb	1.55319	0.0351053	0.26556	2.59639	0.000397082	0.0149416	1.69929	0.0200001	0.174948	-1.32646	0.0624045	0.178645	-0.268588	0.701117	0.824766	8.22332	5.07408	23.8303	26.5131	26.4474	88.1015	25.0529	30.9933	2.72597	38.6813	22.2754	23.1095	0	0	1	0	0	0	0	0
chr17	31220154	31220353	intron (NM_177823, intron 6 of 13)	12187	Ubash3a	1.20332	0.107227	0.492263	2.59541	0.00044073	0.015949	1.69502	0.0212057	0.181298	-2.46782	0.00106101	0.00705321	-1.20556	0.0944754	0.21879	9.71847	1.69136	12.2287	23.3939	27.4646	75.2867	16.006	33.9103	9.54091	3.86813	7.42512	10.9245	0	0	1	0	0	0	0	1
chr6	95614785	95614984	intron (NM_001326558, intron 2 of 10)	77998	Suclg2	2.43225	0.000664813	0.0198792	2.59302	0.000318052	0.0129199	2.60536	0.000227327	0.00897617	-0.847655	0.200699	0.408208	-0.994554	0.11773	0.25692	5.23302	0	27.9065	20.2747	25.4302	30.4351	29.2284	26.6178	13.6299	15.4725	12.3752	13.4455	1	0	1	0	1	0	0	0
chr9	57968971	57969170	Intergenic	28935	Sema7a	2.16878	0.000130182	0.00620675	2.59111	5.18846e-06	0.000619045	1.44738	0.0106546	0.119742	0.812699	0.0989382	0.25008	3.28734	8.01e-12	3.33668e-10	8.9709	5.07408	26.6523	57.705	33.5679	78.4904	27.8365	20.0545	99.4981	100.571	212.854	309.247	1	0	1	0	0	0	0	0
chr5	99499839	99500038	intron (NR_030692, intron 2 of 3)	229122	A930011G23Rik	0.618707	0.37571	0.828417	2.59104	0.000134458	0.00677943	2.57914	0.000118407	0.00573613	-1.92806	0.00413531	0.0213507	-0.745483	0.228787	0.409232	5.9806	6.76544	11.6016	9.35756	22.3786	76.8886	34.0998	61.622	13.6299	7.73626	27.2254	27.7314	0	0	1	0	1	0	0	1
chr4	88010589	88010788	intron (NM_027326, intron 2 of 10)	22719	Mllt3	1.62732	0.0293608	0.239022	2.58869	0.000492324	0.017284	2.69561	0.000240388	0.00936718	-0.884793	0.209512	0.419529	-0.595394	0.382744	0.572862	0.747575	10.1482	10.3473	29.6323	22.3786	59.2683	30.6202	56.1526	19.0818	21.2747	19.8003	33.6138	0	0	1	0	1	0	0	0
chr12	100480696	100480895	intron (NM_001033213, intron 3 of 19)	40027	Ttc7b	1.42035	0.0280231	0.23184	2.58121	5.74876e-05	0.00368977	1.88464	0.00315123	0.0547274	-2.04707	0.00139146	0.00882133	-1.53389	0.0148562	0.0508267	10.466	11.8395	34.4912	32.7515	29.4991	134.555	50.1058	45.5784	9.54091	25.1428	17.3253	13.0254	0	0	1	0	0	0	0	1
chr13	113170420	113170619	Intergenic	10378	Gzmk	2.85147	2.04672e-05	0.00156597	2.57647	0.000150431	0.00735217	2.63027	7.71171e-05	0.00422191	0.597258	0.30528	0.531576	-0.47722	0.408372	0.596351	1.49515	6.76544	34.8047	37.4302	35.6023	22.4258	33.4039	27.7117	59.9714	30.945	19.8003	22.2691	1	0	1	0	1	0	0	0
chr7	142379310	142379509	intron (NM_009983, intron 5 of 8)	-5663	Ifitm10	1.79447	0.00540924	0.0810791	2.57262	6.29812e-05	0.00395805	1.76528	0.00565839	0.080131	-0.161869	0.780763	0.89293	1.48917	0.00795729	0.03018	5.23302	6.76544	15.3642	37.4302	31.5335	59.2683	29.2284	20.0545	40.8896	38.6813	47.0258	97.9002	0	0	1	0	0	0	0	0
chr9	77683535	77683734	Intergenic	46902	Klhl31	2.36796	7.7964e-05	0.00422386	2.56565	2.10417e-05	0.00180151	2.49698	2.57801e-05	0.00181674	-1.66225	0.00453625	0.0229729	-1.95695	0.000557091	0.00301752	7.47575	6.76544	38.5674	51.4666	45.7744	57.6664	46.6262	50.6832	19.0818	9.67032	7.42512	13.0254	1	0	1	0	1	0	0	1
chr10	98877945	98878144	Intergenic	-37108	Atp2b1	2.29419	2.70466e-06	0.000338623	2.56438	1.66018e-07	3.90362e-05	2.70822	2.48805e-08	7.19415e-06	0.51192	0.266968	0.489162	-0.285021	0.534419	0.703193	13.4563	42.284	176.846	109.172	183.098	168.194	169.803	219.87	361.192	146.989	165.828	152.102	1	0	1	0	1	0	0	0
chr17	44455737	44455936	Intergenic	267264	Clic5	1.53962	0.00872926	0.110845	2.56168	1.10476e-05	0.00112822	1.85427	0.00135134	0.031697	-0.693103	0.203402	0.411363	-0.147047	0.784278	0.878177	14.2039	5.07408	39.1945	28.0727	49.8433	97.7126	36.1875	49.9539	44.9786	42.5494	24.7504	49.1602	0	0	1	0	1	0	0	0
chr10	98880165	98880364	Intergenic	-34888	Atp2b1	2.37061	5.31893e-05	0.00321802	2.56079	1.48593e-05	0.00139078	2.63932	5.17322e-06	0.000505433	2.63007	9.2687e-08	3.13743e-06	1.78065	0.000204181	0.00124298	5.9806	5.07408	45.1521	28.0727	54.9293	30.4351	46.6262	45.2138	440.245	148.923	153.453	182.775	1	0	1	0	1	0	1	0
chr19	12479331	12479530	intron (NM_172442, intron 6 of 8)	18651	Mpeg1	2.05551	0.00157864	0.0357583	2.55963	8.39435e-05	0.00483422	2.50901	9.79814e-05	0.00505664	-2.26447	0.000589746	0.00436599	-0.967332	0.111649	0.247388	12.7088	3.38272	36.3725	53.0262	34.5851	96.1107	47.3221	76.2071	5.45195	17.4066	19.8003	37.3954	1	0	1	0	1	0	0	1
chr11	76572926	76573125	intron (NM_198894, intron 1 of 22)	-1641	Abr	2.12186	0.00202835	0.0424904	2.55914	0.000203464	0.00921745	2.25161	0.000943019	0.0247444	0.0149112	0.981079	0.992486	1.53983	0.0108809	0.0392192	5.9806	3.38272	20.3811	38.9898	28.4819	52.8609	13.9183	48.86	19.0818	63.8241	99.0016	105.043	1	0	1	0	0	0	0	0
chr1	134098038	134098237	Intergenic	-13105	Chit1	1.84989	0.00440006	0.07091	2.55882	7.8876e-05	0.00463321	1.84866	0.00406013	0.065021	-0.847902	0.164073	0.356599	0.211743	0.720267	0.837049	9.71847	3.38272	37.3132	23.3939	30.5163	76.8886	27.1406	34.6396	16.3558	40.6153	34.6506	37.8155	0	0	1	0	0	0	0	0
chr4	117220769	117220968	intron (NM_001145637, intron 7 of 12)	31049	Armh1	1.15563	0.0942849	0.459661	2.55873	0.000180128	0.00837272	1.85928	0.00623466	0.0854488	-2.99957	3.20175e-05	0.000399821	-2.89932	5.16277e-05	0.000370046	9.71847	10.1482	16.932	34.3111	41.7056	104.12	31.3161	52.8709	12.2669	0	2.47504	4.6219	0	0	1	0	0	0	0	1
chr18	61707626	61707825	promoter-TSS (NM_172832)	-90	Pcyox1l	2.93618	1.78985e-11	1.87553e-08	2.55696	6.32608e-09	2.60624e-06	2.44125	2.1566e-08	6.53789e-06	0.368322	0.366328	0.59274	-0.0931689	0.818074	0.898241	23.1748	32.1358	247.709	212.105	184.115	166.592	198.335	125.432	312.124	143.121	173.253	131.934	1	0	1	0	1	0	0	0
chr9	14499421	14499620	intron (NM_173433, intron 1 of 1)	962	Kdm4d	2.23036	1.87548e-06	0.000258679	2.55575	5.08079e-08	1.45063e-05	2.60085	2.05773e-08	6.31762e-06	-1.0821	0.0156179	0.0617255	-0.0916498	0.830269	0.905813	21.6797	21.9877	107.863	118.529	89.5144	198.629	125.96	168.458	62.6974	67.6922	99.0016	171.851	1	0	1	0	1	0	0	0
chr16	91789869	91790068	intron (NM_001110275, intron 4 of 28)	60597	Itsn1	1.62503	0.00136167	0.0322216	2.5532	4.48343e-07	9.04227e-05	1.92444	0.000134752	0.00626606	-2.41121	2.4834e-06	4.77672e-05	-0.912362	0.0643877	0.163814	27.6603	45.6667	100.965	140.363	126.134	349.202	155.885	142.569	40.8896	38.6813	39.6007	106.724	1	0	1	0	1	0	0	1
chr15	75633415	75633614	Intergenic	16830	Zfp41	2.1014	0.000133555	0.0063269	2.55265	3.625e-06	0.000475452	2.15734	7.51424e-05	0.00413	-1.12617	0.0305525	0.103667	-0.712308	0.157947	0.316512	8.9709	13.5309	41.7029	67.0625	67.1358	81.6941	58.4567	52.5063	23.1708	42.5494	22.2754	39.9164	1	0	1	0	1	0	0	0
chr18	12644302	12644501	intron (NM_028341, intron 1 of 13)	868	Ttc39c	2.4081	0.000100033	0.00512409	2.55185	4.31203e-05	0.00304763	2.0548	0.000844718	0.0228876	-0.0259236	0.962621	0.984485	-0.235945	0.667792	0.803217	8.22332	1.69136	37.9403	37.4302	33.5679	51.259	26.4447	31.3579	49.0675	32.8791	22.2754	25.6305	1	0	1	0	1	0	0	0
chr6	108672152	108672351	Intergenic	-11317	0610040F04Rik	2.26556	0.000758853	0.0217079	2.54534	0.000171497	0.00805701	2.19954	0.000959661	0.0250431	1.29454	0.0242422	0.0865445	1.80384	0.00118866	0.00586627	1.49515	6.76544	15.6778	34.3111	25.4302	33.6387	13.9183	30.6287	89.9571	63.8241	108.902	68.068	0	0	1	0	0	0	0	0
chr19	53407524	53407723	Intergenic	-17050	Smndc1	1.71305	0.0178397	0.174106	2.54505	0.00041463	0.015362	1.98908	0.00550208	0.0788849	-1.19666	0.086477	0.227146	-0.640325	0.351384	0.542553	12.7088	0	26.9658	32.7515	26.4474	88.1015	27.1406	45.943	17.7188	27.0769	9.90016	31.5129	0	0	1	0	0	0	0	0
chr5	43824728	43824927	intron (NM_009763, intron 4 of 8)	5934	Bst1	1.43072	0.00779303	0.102816	2.54326	1.96708e-06	0.000294464	1.88759	0.000392017	0.0133293	-1.48913	0.00450746	0.0228562	-0.79853	0.122734	0.264521	31.3981	16.9136	48.9147	99.814	115.962	216.249	97.4279	106.471	77.6903	30.945	34.6506	73.9504	0	0	1	0	1	0	0	0
chr8	115742706	115742905	Intergenic	-35911	Maf	3.49487	4.73248e-10	3.08263e-07	2.54265	8.98307e-06	0.000955854	2.73996	1.04217e-06	0.000147748	2.5082	2.25223e-07	6.60093e-06	1.94561	3.5812e-05	0.000267133	2.24272	13.5309	90.6177	110.731	63.067	35.2406	70.2873	45.5784	425.252	195.34	205.428	269.331	1	0	1	0	1	0	1	0
chr11	70790569	70790768	TTS (NM_001045526)	21893	Scimp	2.25877	0.000187381	0.00816648	2.54265	2.72537e-05	0.00215005	1.74681	0.00379072	0.0620021	-1.10027	0.0596901	0.172607	0.672834	0.235183	0.417143	16.4466	8.4568	60.5163	88.8968	61.0326	123.342	58.4567	42.6614	17.7188	63.8241	42.0757	119.749	1	0	1	0	0	0	0	0
chr15	51730146	51730345	Intergenic	135216	Eif3h	2.19753	0.000285227	0.011205	2.54094	2.97619e-05	0.00231384	2.6709	7.57001e-06	0.000678233	-0.024065	0.964417	0.985245	-0.0448291	0.931018	0.962987	4.48545	8.4568	35.4318	32.7515	40.6884	48.0554	38.9712	57.6111	58.6084	27.0769	59.401	37.8155	1	0	1	0	1	0	0	0
chr19	53800687	53800886	intron (NM_001170847, intron 1 of 13)	-91445	Pdcd4	2.29747	0.000156878	0.00712707	2.53836	3.65341e-05	0.00269269	1.95853	0.00117438	0.0288225	2.23012	3.02204e-06	5.6267e-05	3.056	2.73067e-11	1.0017e-09	3.73787	3.38272	23.5167	24.9535	20.3442	38.4443	19.4856	18.2314	175.825	114.11	136.127	206.725	1	0	1	0	0	0	1	0
chr6	122293944	122294143	Intergenic	-11210	Klrg1	3.08986	4.57126e-07	8.23366e-05	2.53745	4.70961e-05	0.00320187	2.56461	2.71371e-05	0.00188708	1.12557	0.0347628	0.114425	1.27828	0.0129021	0.045236	5.9806	3.38272	53.9316	62.3837	32.5507	44.8517	24.357	53.2355	126.758	48.3516	89.1015	110.926	1	0	1	0	1	0	0	0
chr9	118519218	118519417	intron (NM_018748, intron 2 of 23)	12999	Golga4	1.01004	0.160755	0.595489	2.5373	0.000351231	0.0137754	2.29154	0.0011285	0.0280651	-1.47713	0.0328792	0.109673	-0.927649	0.166844	0.328873	9.71847	3.38272	18.1862	14.0363	22.3786	86.4996	22.9652	64.9036	21.8078	11.6044	17.3253	24.7902	0	0	1	0	1	0	0	0
chr4	145275042	145275241	intron (NM_009401, intron 11 of 12)	-28271	Tnfrsf1b	2.67577	7.94479e-07	0.000132053	2.53404	3.60194e-06	0.000475334	2.41549	7.56786e-06	0.000678233	1.55767	0.00130432	0.00837163	1.44302	0.0024282	0.010953	14.2039	5.07408	81.8381	79.5393	47.8088	99.3144	50.8017	82.0411	323.028	129.582	210.378	174.792	1	0	1	0	1	0	0	0
chr10	99221632	99221831	Intergenic	-41500	Dusp6	1.62334	0.0132238	0.143984	2.53195	0.000100691	0.00554689	2.28475	0.000357156	0.0124711	1.26329	0.0232843	0.0839014	0.678446	0.216718	0.394198	5.23302	3.38272	15.6778	20.2747	44.7572	24.0277	33.4039	24.7946	128.121	48.3516	44.5507	50.8409	0	0	1	0	1	0	0	0
chr15	52753820	52754019	Intergenic	41474	Med30	0.388943	0.504428	0.895399	2.5313	7.33752e-06	0.000814938	1.80083	0.00133019	0.0313982	-2.38851	3.5955e-05	0.000440321	-1.65746	0.00290921	0.0128029	11.9612	16.9136	15.9914	23.3939	60.0153	128.148	57.7608	51.0478	19.0818	11.6044	19.8003	13.4455	0	0	1	0	1	0	0	1
chr10	94864692	94864891	exon (NM_018797, exon 9 of 31)	79787	Plxnc1	2.64844	9.63372e-07	0.000153763	2.52863	3.82424e-06	0.000488955	2.65149	7.57065e-07	0.000117335	1.46758	0.00160203	0.00989509	0.896586	0.047695	0.130151	7.47575	8.4568	71.1772	46.7878	60.0153	49.6572	44.5385	75.1132	213.989	104.439	108.902	121.43	1	0	1	0	1	0	0	0
chr9	120340079	120340278	intron (NM_144557, intron 2 of 16)	36105	Myrip	2.48335	1.54821e-07	3.48724e-05	2.52833	1.07509e-07	2.69904e-05	2.38503	4.08617e-07	7.1539e-05	-1.81626	0.000111191	0.00110966	-1.5642	0.00056038	0.00303363	24.67	16.9136	128.872	135.685	92.566	182.61	130.136	115.951	34.0747	38.6813	24.7504	49.1602	1	0	1	0	1	0	0	1
chr12	107721108	107721307	Intergenic	14281	4930465M20Rik	1.9298	9.26889e-06	0.000851007	2.52209	6.70969e-09	2.71782e-06	2.16757	4.97117e-07	8.46715e-05	-1.73285	5.12504e-05	0.000589026	-0.572486	0.158127	0.316767	29.1554	25.3704	121.973	101.374	131.22	214.647	132.224	134.183	46.3416	52.2197	61.876	108.825	1	0	1	0	1	0	0	1
chr5	147159446	147159645	Intergenic	-29151	Gsx1	1.30751	0.00488135	0.0760721	2.52079	4.56826e-08	1.33454e-05	2.08713	5.2794e-06	0.000511906	-1.68108	0.000217012	0.00191863	-0.633126	0.150723	0.305992	28.4078	40.5926	77.4483	101.374	145.461	283.527	159.364	152.414	81.7792	42.5494	69.3011	122.69	0	0	1	0	1	0	0	1
chr18	68189995	68190194	intron (NM_172631, intron 3 of 5)	70879	Mir7219	2.15037	1.11358e-07	2.65728e-05	2.51655	5.47545e-10	3.17985e-07	2.51719	4.24209e-10	2.76321e-07	0.22841	0.556307	0.749822	-0.0503676	0.896124	0.943632	73.2623	37.2099	259.624	279.167	316.352	384.443	306.898	392.703	562.914	259.165	316.805	357.147	1	0	1	0	1	0	0	0
chr1	127954311	127954510	3' UTR (NM_001285945, exon 21 of 21)	85637	Rab3gap1	1.83111	0.00830268	0.107208	2.50869	0.000292315	0.0120966	2.44019	0.000356791	0.0124711	-2.35368	0.000925718	0.00630959	-2.94031	2.71074e-05	0.000208128	6.72817	5.07408	21.9489	31.1919	39.6712	48.0554	43.8426	38.6505	2.72597	11.6044	0	5.46224	0	0	1	0	1	0	0	1
chr16	91780900	91781099	intron (NM_001110275, intron 1 of 28)	51628	Itsn1	1.81673	0.000638589	0.0193593	2.50332	2.44352e-06	0.000347814	2.08556	7.72205e-05	0.00422191	-3.31302	1.10096e-08	5.30686e-07	-2.4502	5.23085e-06	4.84135e-05	14.2039	30.4445	89.3634	74.8605	87.48	187.416	87.6851	112.67	12.2669	9.67032	7.42512	21.0086	1	0	1	0	1	0	0	1
chr3	79273036	79273235	Intergenic	60216	4921511C10Rik	2.46113	9.37256e-05	0.00489391	2.50079	8.64987e-05	0.00494158	2.49593	6.28035e-05	0.00359531	2.18934	3.96606e-05	0.000477453	1.49994	0.00383402	0.01617	5.9806	1.69136	23.8303	43.6686	40.6884	25.6295	36.8834	30.264	246.701	88.967	84.1514	116.388	1	0	1	0	1	0	1	0
chr14	20181724	20181923	promoter-TSS (NM_021542)	-41	Kcnk5	2.34664	1.22662e-06	0.000183619	2.49871	2.99118e-07	6.55368e-05	2.45496	2.88778e-07	5.33321e-05	-0.304245	0.484774	0.695939	-0.174455	0.676143	0.809123	12.7088	10.1482	65.8468	68.6221	70.1874	80.0923	79.3342	65.9975	58.6084	61.8901	51.9759	72.6899	1	0	1	0	1	0	0	0
chr3	84092965	84093164	intron (NM_029797, intron 7 of 7)	-52903	Tmem131l	1.62297	0.0355618	0.267664	2.49718	0.00116377	0.0317105	2.16796	0.00443167	0.0686958	-2.12687	0.00604765	0.0288851	-1.28609	0.0800274	0.1936	4.48545	5.07408	13.7965	24.9535	24.413	51.259	22.2692	35.0042	5.45195	7.73626	0	16.8069	0	0	1	0	0	0	0	1
chr12	33170891	33171090	intron (NM_028139, intron 2 of 3)	23304	Atxn7l1	1.79578	0.00248046	0.0481916	2.49575	2.60246e-05	0.00208033	2.47067	1.88714e-05	0.00141689	2.16813	3.58016e-06	6.51949e-05	2.28774	2.59287e-07	3.41293e-06	2.9903	6.76544	21.6354	15.5959	21.3614	44.8517	30.6202	32.8164	175.825	135.384	150.977	180.674	0	0	1	0	1	0	1	0
chr18	14653863	14654062	intron (NM_009280, intron 4 of 10)	28952	Ss18	2.13405	4.30601e-06	0.000483819	2.49508	8.66457e-08	2.23342e-05	2.67526	4.97204e-09	2.06605e-06	0.0409125	0.92166	0.965603	0.229686	0.564967	0.727188	18.6894	8.4568	63.9654	79.5393	82.3939	102.518	91.8606	117.045	107.676	81.2307	136.127	113.447	1	0	1	0	1	0	0	0
chr13	114878800	114878999	intron (NM_008396, intron 6 of 29)	53142	Itga2	2.56772	4.71518e-06	0.00051305	2.49335	1.13778e-05	0.00115101	3.09564	2.23375e-08	6.71516e-06	2.05861	1.51685e-05	0.000214853	0.872507	0.0576842	0.150664	7.47575	5.07408	41.7029	57.705	51.8777	40.0461	57.0649	86.052	288.953	123.78	106.427	161.346	1	0	1	0	1	0	1	0
chr2	103754687	103754886	intron (NM_153126, intron 3 of 28)	6464	Nat10	2.17989	0.000253368	0.0102802	2.49303	3.11564e-05	0.00237627	2.75083	2.8039e-06	0.000326458	-0.163298	0.76255	0.883101	-0.277541	0.593385	0.748792	9.71847	3.38272	24.7709	57.705	42.7228	57.6664	47.3221	72.5608	42.2526	46.4175	47.0258	50.8409	1	0	1	0	1	0	0	0
chr5	64472058	64472257	Intergenic	-4215	1700027F09Rik	2.09189	4.84938e-05	0.00297014	2.49217	1.50422e-06	0.00023165	2.11327	3.17119e-05	0.00213488	2.2815	4.05749e-08	1.57218e-06	2.57894	1.36774e-10	4.18285e-09	6.72817	8.4568	40.4487	32.7515	49.8433	49.6572	41.0589	35.0042	331.206	179.868	220.279	261.347	1	0	1	0	1	0	1	0
chr11	82214434	82214633	Intergenic	-34721	Ccl1	0.796556	0.170552	0.610539	2.48726	1.35336e-05	0.00130496	1.65098	0.00372642	0.0611163	-2.21226	0.000129434	0.00125432	0.0514513	0.924319	0.959307	17.9418	15.2222	29.4743	32.7515	67.1358	152.175	43.1466	73.29	28.6227	11.6044	34.6506	82.3538	0	0	1	0	0	0	0	1
chr13	45883266	45883465	intron (NM_001199304, intron 2 of 6)	81626	Atxn1	2.04311	0.00209755	0.0433559	2.48641	0.000186703	0.00861193	1.92244	0.00353762	0.0589233	-0.532831	0.389683	0.614261	1.0718	0.0708616	0.176402	4.48545	8.4568	27.2794	37.4302	26.4474	64.0738	27.8365	30.264	10.9039	50.2857	56.9259	72.6899	1	0	1	0	0	0	0	0
chr4	55564431	55564630	Intergenic	-32055	Klf4	2.29765	0.000654159	0.0196827	2.48595	0.000248656	0.0107785	2.73875	3.90541e-05	0.00249998	-0.902625	0.155198	0.343034	-1.45792	0.0180129	0.0596988	5.9806	3.38272	24.1438	40.5494	34.5851	38.4443	35.4916	51.777	19.0818	17.4066	4.95008	20.1683	1	0	1	0	1	0	0	0
chr17	47008893	47009092	intron (NM_146078, intron 1 of 46)	1540	Ubr2	2.34618	0.000154901	0.00706388	2.48254	6.94624e-05	0.0042709	2.41363	8.69968e-05	0.0046183	-1.36808	0.0227553	0.0823649	-0.692045	0.221084	0.399726	4.48545	11.8395	51.7367	40.5494	32.5507	72.083	34.0998	63.0805	19.0818	17.4066	24.7504	32.3533	1	0	1	0	1	0	0	0
chr7	90042508	90042707	intron (NR_110364, intron 5 of 5)	13448	E230029C05Rik	2.56744	4.0365e-05	0.00257024	2.48116	0.000105942	0.00573775	2.68677	1.31135e-05	0.00106954	2.81479	2.27012e-09	1.39217e-07	2.49154	9.99913e-09	1.88494e-07	2.9903	1.69136	25.398	18.7151	20.3442	22.4258	20.8774	28.4409	192.181	135.384	141.077	159.245	0	0	1	0	1	0	1	0
chr6	127302915	127303114	intron (NR_073373, intron 1 of 3)	4953	Gm38404	2.11274	0.00558992	0.0828298	2.48059	0.00120043	0.0323076	2.58304	0.000584401	0.0174315	-1.58239	0.0340542	0.1126	-2.1665	0.00274235	0.012154	3.73787	1.69136	16.932	18.7151	20.3442	27.2314	25.7488	24.7946	4.08896	9.67032	4.95008	4.20173	0	0	1	0	1	0	0	0
chr1	171629276	171629475	Intergenic	12525	Mir7683	1.46392	0.019465	0.1842	2.47913	6.70619e-05	0.00417638	1.83084	0.00299322	0.0528882	-1.22598	0.0398272	0.127305	0.509372	0.366741	0.557707	3.73787	15.2222	22.576	32.7515	38.654	78.4904	27.8365	43.026	24.5338	21.2747	42.0757	60.5049	0	0	1	0	0	0	0	0
chr11	97112586	97112785	intron (NM_019507, intron 1 of 5)	2646	Tbx21	1.89947	0.00151459	0.0348311	2.4771	3.5011e-05	0.00260037	1.4655	0.0140382	0.141903	-1.08048	0.060407	0.17421	1.06311	0.0554145	0.146161	13.4563	10.1482	43.2707	62.3837	37.6367	124.944	31.3161	43.7552	20.4448	52.2197	64.3511	100.001	1	0	1	0	0	0	0	0
chr15	100667983	100668182	intron (NM_001270537, intron 1 of 10)	1418	Bin2	2.00082	0.000167989	0.00753418	2.47208	3.35256e-06	0.000452661	2.21185	2.92539e-05	0.0019973	-3.05611	4.0486e-08	1.57056e-06	-1.93505	0.000240702	0.00143914	47.8448	15.2222	116.643	176.234	139.358	273.916	142.662	196.534	8.17792	34.8132	32.1755	46.6392	1	0	1	0	1	0	0	1
chr17	26572364	26572563	intron (NM_026170, intron 1 of 9)	10951	Ergic1	1.22464	0.0509437	0.327674	2.47203	7.31641e-05	0.00439185	2.15216	0.000519582	0.0160544	-0.611066	0.311501	0.538319	0.901219	0.128121	0.272813	25.4175	8.4568	31.042	63.9433	35.6023	206.638	66.8077	121.056	47.7045	104.439	175.728	195.8	0	0	1	0	1	0	0	0
chr9	102792053	102792252	Intergenic	-42768	Ryk	1.86381	0.00878289	0.111233	2.47108	0.000508836	0.0177346	2.21688	0.00160622	0.0352564	-0.9081	0.178429	0.377685	-1.26549	0.0591823	0.153807	4.48545	6.76544	18.8134	32.7515	35.6023	44.8517	31.3161	34.2749	32.7117	5.80219	19.8003	7.56311	0	0	1	0	1	0	0	0
chr6	30346715	30346914	Intergenic	-42275	Ube2h	1.37133	0.0277495	0.230737	2.46988	6.31874e-05	0.00396067	2.0367	0.000856343	0.0230858	-1.33019	0.0253637	0.0896782	0.00635178	0.990971	0.995909	7.47575	10.1482	15.9914	37.4302	45.7744	70.4812	33.4039	49.5893	24.5338	17.4066	27.2254	53.3619	0	0	1	0	1	0	0	0
chr2	65195594	65195793	intron (NM_027225, intron 1 of 12)	42933	Cobll1	1.86959	0.000910848	0.0244458	2.46785	1.18952e-05	0.00118711	2.72433	8.61197e-07	0.000128917	-0.222018	0.665964	0.826088	-0.841407	0.0946073	0.219001	8.22332	11.8395	41.0758	40.5494	56.9637	70.4812	53.5854	98.4493	73.6013	32.8791	49.5008	35.2945	1	0	1	0	1	0	0	0
chr1	60753066	60753265	intron (NM_007642, intron 1 of 3)	6777	Cd28	0.798061	0.234135	0.703935	2.4665	0.000163048	0.00777371	1.19894	0.0666043	0.343328	0.560409	0.337636	0.564664	1.77097	0.00231076	0.0104881	7.47575	3.38272	11.9151	10.9172	24.413	59.2683	21.5733	10.5742	76.3273	48.3516	44.5507	72.6899	0	0	1	0	0	0	0	0
chr14	87051321	87051520	intron (NM_019670, intron 4 of 27)	89694	Diaph3	3.55726	2.12941e-09	1.05816e-06	2.46463	4.65849e-05	0.00318057	2.88578	1.16812e-06	0.00016368	3.59651	7.98694e-12	1.37988e-09	1.5729	0.00227774	0.0103577	7.47575	5.07408	116.956	96.6948	55.9465	38.4443	59.1527	71.1023	1143.55	205.011	217.804	200.002	1	0	1	0	1	0	1	0
chr2	31082732	31082931	intron (NM_001038700, intron 6 of 14)	13669	Fnbp1	2.23673	0.00018567	0.00811393	2.46237	4.05316e-05	0.00289438	2.13387	0.00034205	0.0121232	0.0224023	0.968631	0.98725	1.35937	0.0150184	0.0512762	23.9224	3.38272	64.5925	104.493	41.7056	158.583	81.4219	73.6547	59.9714	143.121	188.103	238.658	1	0	1	0	1	0	0	0
chr17	12364129	12364328	Intergenic	-14381	Plg	2.67667	1.87746e-07	4.04007e-05	2.4622	2.34592e-06	0.000339574	2.69392	1.21077e-07	2.64079e-05	2.10918	1.16369e-06	2.55428e-05	1.84049	1.03501e-05	8.86926e-05	8.22332	8.4568	54.2452	76.4201	43.74	67.2775	59.8486	70.0084	303.946	199.209	168.303	315.55	1	0	1	0	1	0	1	0
chr19	53972081	53972280	intron (NM_019658, intron 1 of 8)	27304	Shoc2	1.64753	0.0102806	0.122357	2.46118	0.000118787	0.00625086	2.21539	0.000405221	0.0135925	1.59871	0.00259826	0.0146567	1.70756	0.000870514	0.00445986	1.49515	8.4568	11.9151	23.3939	34.5851	25.6295	25.0529	25.5239	117.217	79.2966	76.7263	99.5809	0	0	1	0	1	0	1	0
chr13	95567247	95567446	Intergenic	-42106	F2rl1	2.07961	0.00027118	0.010785	2.46055	1.77898e-05	0.00157052	2.32327	3.74692e-05	0.00242428	0.766942	0.126139	0.29707	1.05946	0.0291593	0.0880719	8.22332	6.76544	29.7878	49.907	46.7916	56.0646	60.5445	32.8164	118.58	59.956	86.6264	112.606	1	0	1	0	1	0	0	0
chr3	146758012	146758211	intron (NM_011100, intron 1 of 9)	12127	Prkacb	1.57872	0.0153706	0.158007	2.45441	0.000152498	0.00740188	1.82931	0.00439827	0.0683889	1.13104	0.0523711	0.156503	1.52519	0.00811473	0.0306829	2.9903	11.8395	26.0251	21.8343	29.4991	65.6757	27.1406	31.3579	173.099	44.4835	81.6763	101.682	0	0	1	0	0	0	0	0
chr6	48803604	48803803	Intergenic	-32852	Gimap3	0.0651087	0.929203	0.993876	2.45283	0.000441606	0.0159687	2.56534	0.000185144	0.00781634	-1.45823	0.0311792	0.105275	-1.8753	0.00422592	0.0175799	5.23302	5.07408	4.38978	7.79797	32.5507	40.0461	43.1466	35.0042	13.6299	9.67032	14.8502	6.30259	0	0	1	0	1	0	0	0
chr14	121102589	121102788	intron (NM_134082, intron 2 of 26)	67114	Farp1	2.35418	8.37563e-06	0.000780893	2.45281	4.4035e-06	0.000541474	2.97714	1.00307e-08	3.31164e-06	1.48271	0.000868709	0.00601027	0.985947	0.020289	0.0656955	5.9806	10.1482	51.1096	40.5494	55.9465	43.2498	61.2404	84.2288	188.092	102.505	136.127	160.086	1	0	1	0	1	0	0	0
chr4	150798895	150799094	Intergenic	55955	1700045H11Rik	2.23693	1.19195e-07	2.80265e-05	2.45232	7.52977e-09	2.99959e-06	2.40329	9.60617e-09	3.24123e-06	0.157151	0.686121	0.837636	0.477052	0.208306	0.383566	25.4175	23.679	120.719	132.565	113.927	182.61	134.311	149.862	204.448	123.78	168.303	228.154	1	0	1	0	1	0	0	0
chr10	39469464	39469663	intron (NM_001122893, intron 3 of 13)	99764	Fyn	2.78007	3.66572e-07	6.94225e-05	2.45074	1.08675e-05	0.00111753	2.2675	3.16685e-05	0.00213488	1.70633	0.000191505	0.00173188	2.31039	1.30364e-07	1.86463e-06	8.9709	1.69136	42.9572	67.0625	42.7228	41.648	40.363	33.9103	159.469	131.516	252.454	147.901	1	0	1	0	1	0	1	0
chr7	66301583	66301782	intron (NM_146191, intron 11 of 33)	80042	Mir7057	1.49555	0.0300593	0.242375	2.44978	0.000350219	0.0137694	1.83729	0.00686399	0.0909701	-0.215548	0.735546	0.866653	0.653299	0.29553	0.485901	5.9806	6.76544	20.3811	23.3939	21.3614	70.4812	14.6142	41.2029	43.6156	32.8791	27.2254	62.6057	0	0	1	0	0	0	0	0
chr6	134348619	134348818	Intergenic	-47611	Bcl2l14	2.27229	3.65263e-05	0.00239869	2.44938	1.05065e-05	0.00109145	2.14607	8.23808e-05	0.00443057	1.12978	0.0151934	0.0604001	1.43762	0.00136684	0.00662821	6.72817	6.76544	38.2538	40.5494	48.826	40.0461	32.7079	38.6505	117.217	85.0988	71.7762	126.472	1	0	1	0	1	0	0	0
chr7	80417025	80417224	Intergenic	-11688	Furin	2.23103	0.000332883	0.0125553	2.44907	8.65253e-05	0.00494158	2.14661	0.000517915	0.0160337	0.506855	0.382901	0.608821	1.88431	0.000916713	0.00466456	3.73787	18.605	56.1265	62.3837	27.4646	113.731	39.6671	70.7376	79.0533	125.714	146.027	304.625	1	0	1	0	1	0	0	0
chr1	143466216	143466415	Intergenic	-174382	B3galt2	1.51303	0.0336261	0.259055	2.44879	0.000546079	0.0187052	2.53714	0.000287409	0.0106813	-1.43552	0.0376699	0.121847	-2.1794	0.00151343	0.0072357	3.73787	10.1482	22.576	21.8343	31.5335	60.8701	27.8365	68.9145	23.1708	5.80219	4.95008	10.9245	0	0	1	0	1	0	0	0
chr11	17007952	17008151	intron (NM_019549, intron 1 of 9)	667	Plek	1.82498	0.014352	0.151576	2.44765	0.00101538	0.0290405	1.65771	0.0251093	0.200774	-1.07555	0.13254	0.307722	0.0662668	0.923923	0.958978	2.24272	8.4568	11.288	35.8706	34.5851	38.4443	22.2692	17.1375	24.5338	5.80219	27.2254	15.9666	0	0	1	0	0	0	0	0
chr13	45869926	45870125	intron (NM_001199304, intron 2 of 6)	94966	Atxn1	1.76361	0.00892945	0.112469	2.44626	0.00028025	0.0117773	1.9946	0.0027266	0.0501058	-0.451547	0.468821	0.683528	0.59793	0.318204	0.509706	8.22332	1.69136	20.0676	28.0727	24.413	56.0646	25.0529	30.9933	14.9929	42.5494	44.5507	44.1181	0	0	1	0	0	0	0	0
chr3	37257783	37257982	Intergenic	-25246	Il21	2.62362	2.14467e-06	0.000288686	2.44585	1.43667e-05	0.00134991	2.68703	9.19849e-07	0.000134359	0.45378	0.335956	0.5632	1.78558	3.21604e-05	0.000242863	5.9806	5.07408	44.5249	42.109	29.4991	48.0554	37.5793	52.8709	55.8825	50.2857	146.027	182.355	1	0	1	0	1	0	0	0
chr1	173912898	173913097	promoter-TSS (NM_001301745)	49	Ifi211	2.74067	0.000104719	0.00527997	2.44497	0.000653346	0.0212644	2.64187	0.000165884	0.00722961	1.14846	0.0641766	0.182407	0.864418	0.148804	0.302975	3.73787	1.69136	39.1945	20.2747	23.3958	25.6295	22.9652	33.5457	94.0461	21.2747	56.9259	52.9418	1	0	1	0	1	0	0	0
chr19	25057934	25058133	intron (NM_028785, intron 2 of 47)	58504	Dock8	2.56878	1.56525e-05	0.00128185	2.44459	4.80429e-05	0.00324792	2.76287	2.74771e-06	0.000322111	-0.849547	0.129254	0.302575	-1.04229	0.0506555	0.136522	7.47575	6.76544	51.7367	53.0262	57.9809	36.8424	58.4567	61.9866	27.2597	23.2088	12.3752	38.2357	1	0	1	0	1	0	0	0
chr11	53839800	53839999	intron (NR_033332, intron 2 of 3)	19357	Gm12216	1.56224	0.0132508	0.144127	2.44259	0.000101462	0.00557024	1.70816	0.00631414	0.086115	-2.42439	0.000163745	0.00152049	-0.620039	0.305911	0.496943	11.2136	16.9136	31.9827	62.3837	38.654	142.564	50.8017	52.1417	12.2669	15.4725	14.8502	45.3786	0	0	1	0	0	0	0	1
chr9	86617936	86618135	intron (NM_008615, intron 7 of 13)	45982	Rwdd2a	1.70256	0.00396721	0.0663064	2.44028	3.47109e-05	0.00258658	2.32395	6.52187e-05	0.00368111	-2.10603	0.000416051	0.00328815	-1.97271	0.000533711	0.00290393	7.47575	15.2222	41.0758	37.4302	53.9121	83.296	62.6322	61.9866	19.0818	7.73626	22.2754	9.66397	0	0	1	0	1	0	0	1
chr11	82195073	82195272	Intergenic	-15360	Ccl1	2.37471	6.22291e-05	0.0035966	2.43832	4.94401e-05	0.00329994	1.20624	0.0441611	0.275875	0.990584	0.0477674	0.145865	2.81838	8.51384e-09	1.63304e-07	5.9806	3.38272	30.4149	35.8706	26.4474	43.2498	14.6142	13.1266	72.2383	69.6263	81.6763	132.354	1	0	1	0	0	0	0	0
chr7	79249660	79249859	Intergenic	-23507	Abhd2	1.3543	0.015364	0.157996	2.43733	1.12417e-05	0.00114561	1.94402	0.000420429	0.0139091	-1.27237	0.0184084	0.0699242	-0.913465	0.0861335	0.204341	17.1942	18.605	47.0334	53.0262	68.153	155.379	70.9832	82.7703	59.9714	25.1428	19.8003	53.3619	0	0	1	0	1	0	0	0
chr2	70091315	70091514	intron (NM_177376, intron 2 of 34)	52288	Myo3b	2.29189	2.45843e-05	0.00177132	2.43374	8.16298e-06	0.000884207	2.51312	3.18868e-06	0.000360059	0.311662	0.53981	0.737924	-0.166008	0.741254	0.85055	13.4563	18.605	90.3041	87.3372	96.6349	100.916	113.434	95.8969	197.633	48.3516	61.876	118.909	1	0	1	0	1	0	0	0
chr9	66899605	66899804	intron (NM_173413, intron 1 of 7)	20001	Rab8b	2.7898	3.44746e-06	0.000411322	2.43316	7.27658e-05	0.00437885	2.10145	0.000467131	0.0148931	0.524543	0.3109	0.537717	1.76118	0.000283642	0.00166025	5.23302	3.38272	30.7285	54.5858	31.5335	32.0369	22.9652	26.6178	43.6156	50.2857	76.7263	101.682	1	0	1	0	1	0	0	0
chr1	40190087	40190286	Intergenic	-34894	Il1r1	2.1037	0.00138889	0.0326413	2.43205	0.000232438	0.0102133	2.09645	0.0013041	0.0310268	-2.19464	0.00116026	0.0076174	-1.26187	0.0415933	0.117025	8.22332	3.38272	36.686	28.0727	33.5679	51.259	29.9243	35.0042	4.08896	11.6044	9.90016	13.8657	1	0	1	0	1	0	0	1
chr5	73199723	73199922	intron (NM_028194, intron 2 of 62)	56796	Fryl	2.875	9.48689e-07	0.000151923	2.43075	4.91275e-05	0.00329365	3.05357	1.45009e-07	3.02585e-05	2.04314	3.20734e-05	0.000400112	1.03005	0.0280767	0.0855417	3.73787	6.76544	36.0589	62.3837	29.4991	40.0461	50.1058	58.705	212.626	92.8351	123.752	108.825	1	0	1	0	1	0	1	0
chr9	102835265	102835464	intron (NM_001284258, intron 1 of 13)	444	Ryk	2.03281	0.00199234	0.0420047	2.43058	0.000240553	0.0105028	2.24961	0.000504837	0.015707	0.99113	0.0731072	0.201263	0.161341	0.76734	0.867307	3.73787	3.38272	21.0082	17.1555	29.4991	22.4258	22.2692	23.3361	58.6084	50.2857	24.7504	26.4709	0	0	1	0	1	0	0	0
chr13	41355650	41355849	intron (NM_001111324, intron 2 of 7)	3252	Nedd9	2.10165	0.000392231	0.0141409	2.42615	4.82743e-05	0.00325808	2.61515	6.99989e-06	0.000640245	0.102091	0.844059	0.927531	-0.150313	0.761147	0.863211	5.9806	5.07408	28.22	31.1919	36.6195	38.4443	36.1875	49.2247	36.8007	44.4835	42.0757	36.1348	1	0	1	0	1	0	0	0
chr3	107796666	107796865	Intergenic	-36296	Csf1	1.9481	0.00585125	0.0848502	2.42394	0.000622455	0.0205083	2.86586	3.63007e-05	0.00237054	-1.41705	0.0387933	0.124761	-0.868131	0.166481	0.328425	5.9806	1.69136	22.576	20.2747	21.3614	41.648	29.2284	56.5172	12.2669	7.73626	14.8502	27.7314	0	0	1	0	1	0	0	0
chr2	116972234	116972433	Intergenic	72181	D330050G23Rik	2.80835	2.65174e-07	5.30371e-05	2.42388	1.24285e-05	0.00121763	2.17665	6.46777e-05	0.00366345	1.94945	3.46538e-05	0.000427536	1.80252	8.7941e-05	0.000592278	8.22332	6.76544	68.3552	63.9433	51.8777	48.0554	38.9712	44.4845	301.22	110.242	121.277	185.716	1	0	1	0	1	0	1	0
chr14	75192877	75193076	intron (NM_008879, intron 2 of 16)	-49311	Cpb2	2.53764	1.32457e-05	0.00112605	2.42216	4.24928e-05	0.00301655	2.90496	4.29747e-07	7.47822e-05	0.974452	0.0498485	0.150712	1.33096	0.00418651	0.0174445	7.47575	1.69136	37.3132	42.109	35.6023	36.8424	32.012	70.0084	70.8753	77.3626	146.027	127.312	1	0	1	0	1	0	0	0
chr13	43239908	43240107	intron (NM_001033399, intron 1 of 1)	64165	Gfod1	1.60937	0.00511987	0.0783702	2.42132	2.3371e-05	0.00193333	1.96376	0.000510311	0.0158492	0.619376	0.223369	0.437711	1.66719	0.000721592	0.0037855	7.47575	10.1482	23.5167	38.9898	46.7916	64.0738	46.6262	32.4518	46.3416	129.582	136.127	131.514	0	0	1	0	1	0	0	0
chr10	12888489	12888688	Intergenic	-26853	Utrn	1.87667	1.31754e-05	0.00112205	2.42038	1.92699e-08	7.20038e-06	2.30677	5.80853e-08	1.50528e-05	-0.652678	0.106044	0.262601	0.0372422	0.923594	0.958748	21.6797	27.0618	80.5839	110.731	113.927	166.592	138.487	118.868	74.9643	100.571	108.902	151.262	1	0	1	0	1	0	0	0
chr5	73286581	73286780	Intergenic	-2496	1700025M24Rik	2.54883	1.70768e-05	0.00137648	2.41775	5.89307e-05	0.00375241	2.30113	9.26135e-05	0.00484707	0.685013	0.181671	0.382397	0.932907	0.0571851	0.149692	4.48545	6.76544	31.6692	49.907	32.5507	40.0461	33.4039	32.8164	72.2383	46.4175	51.9759	76.4714	1	0	1	0	1	0	0	0
chr2	78972619	78972818	Intergenic	103671	Ube2e3	1.99266	0.00122959	0.0300552	2.41701	9.31972e-05	0.00523577	2.09529	0.000583727	0.0174222	0.339948	0.537571	0.736261	0.130527	0.810233	0.893681	2.9903	11.8395	36.686	24.9535	44.7572	41.648	37.5793	30.6287	73.6013	36.7472	37.1256	37.8155	1	0	1	0	1	0	0	0
chr15	101485991	101486190	intron (NM_001201323, intron 7 of 8)	5213	Krt85	2.24923	0.00071389	0.0208931	2.41695	0.000291769	0.0120966	2.03997	0.00204856	0.0412986	-1.71945	0.00926808	0.0407721	-0.478917	0.446159	0.630483	11.9612	5.07408	50.4825	56.1454	32.5507	89.7033	30.6202	59.4342	4.08896	29.011	34.6506	28.9919	1	0	1	0	1	0	0	1
chr6	108688431	108688630	Intergenic	-27596	0610040F04Rik	1.69976	0.00189373	0.0406419	2.41445	9.76192e-06	0.00102739	2.35634	1.27787e-05	0.00104933	-0.511871	0.32129	0.548186	0.39523	0.428293	0.614605	17.9418	11.8395	70.2365	38.9898	67.1358	123.342	50.1058	129.807	74.9643	54.1538	99.0016	140.758	1	0	1	0	1	0	0	0
chr15	97356019	97356218	intron (NM_172293, intron 3 of 5)	-108831	Amigo2	2.77841	1.64809e-05	0.00133067	2.41121	0.000224403	0.00992355	2.03651	0.00158611	0.0350211	-0.302055	0.614608	0.791634	0.293965	0.612326	0.763222	7.47575	3.38272	41.0758	65.5029	26.4474	54.4627	30.6202	29.5348	27.2597	36.7472	17.3253	52.9418	1	0	1	0	1	0	0	0
chr7	100449023	100449222	intron (NM_001017985, intron 29 of 32)	-23869	Ucp3	1.63471	0.00116083	0.0290068	2.41009	1.58466e-06	0.000241721	2.00653	5.8228e-05	0.00339414	-2.07469	3.99472e-05	0.000479572	-1.74343	0.000442515	0.00246022	27.6603	33.8272	64.5925	143.483	114.945	246.684	136.399	131.266	34.0747	44.4835	22.2754	47.4795	1	0	1	0	1	0	0	1
chrX	47998515	47998714	Intergenic	36239	Apln	2.11578	9.32949e-06	0.000854943	2.40973	5.15828e-07	0.000100664	2.31774	8.8367e-07	0.000131061	-0.33257	0.44435	0.663612	-0.342703	0.415415	0.602732	13.4563	13.5309	68.0416	60.8241	77.3079	83.296	75.8546	74.0193	69.5123	56.0879	44.5507	68.4881	1	0	1	0	1	0	0	0
chr13	45935882	45936081	intron (NM_001199304, intron 2 of 6)	29010	Atxn1	2.74434	8.85774e-08	2.22375e-05	2.40919	3.72138e-06	0.000480216	2.58553	3.97026e-07	7.06911e-05	-0.638046	0.181406	0.382013	-0.230638	0.606534	0.758927	10.466	10.1482	74.9399	87.3372	50.8605	76.8886	85.5974	58.705	35.4377	44.4835	49.5008	69.3285	1	0	1	0	1	0	0	0
chr15	34389068	34389267	intron (NM_016762, intron 6 of 18)	-31295	9430069I07Rik	2.13836	0.00204145	0.0426906	2.40477	0.000577056	0.0194746	2.78492	4.3198e-05	0.00271109	-0.0571483	0.926798	0.967887	-1.61158	0.00952999	0.0351761	3.73787	3.38272	15.9914	28.0727	23.3958	28.8332	35.4916	33.1811	29.9857	19.3406	9.90016	10.0841	0	0	1	0	1	0	0	0
chr9	44526349	44526548	promoter-TSS (NM_007551)	-27	Cxcr5	2.6685	2.04233e-08	6.78927e-06	2.40306	6.42332e-07	0.000118174	1.90087	6.48384e-05	0.00366824	0.630243	0.134272	0.310267	2.11207	1.69363e-07	2.34682e-06	13.4563	10.1482	77.4483	101.374	65.1014	81.6941	52.1935	49.5893	77.6903	154.725	230.179	234.456	1	0	1	0	1	0	0	0
chr10	81407673	81407872	intron (NM_026756, intron 5 of 8)	8525	Mir1191b	1.90084	0.00265824	0.0506453	2.40134	0.00014868	0.00731853	2.16052	0.000562377	0.0170596	-0.484333	0.417448	0.639987	-0.548727	0.352094	0.543109	11.2136	6.76544	30.4149	54.5858	31.5335	91.3052	48.018	52.8709	21.8078	63.8241	24.7504	39.9164	0	0	1	0	1	0	0	0
chr1	173906074	173906273	exon (NM_001301745, exon 3 of 7)	6873	Ifi211	2.14106	8.61051e-06	0.000799699	2.40076	6.5976e-07	0.000120007	2.77457	5.75697e-09	2.27487e-06	0.23608	0.599221	0.780589	-0.430491	0.330652	0.522048	26.1651	15.2222	126.049	81.0989	103.755	150.573	107.867	222.787	185.366	114.11	106.427	134.455	1	0	1	0	1	0	0	0
chr10	95299557	95299756	intron (NM_009950, intron 2 of 2)	24053	Cradd	1.60607	0.0194897	0.184335	2.39973	0.00045991	0.0164577	1.55476	0.022298	0.187072	1.35574	0.0275253	0.0957129	2.18001	0.000338581	0.00193966	8.9709	0	24.4574	15.5959	22.3786	54.4627	12.5264	26.6178	159.469	50.2857	89.1015	117.228	0	0	1	0	0	0	0	0
chr9	5308737	5308936	promoter-TSS (NM_007609)	-13	Casp4	2.48254	1.41579e-05	0.00118685	2.39779	3.03599e-05	0.00233701	2.76898	1.11982e-06	0.000157369	0.903255	0.0933244	0.239875	-0.354735	0.507416	0.682435	8.9709	23.679	129.499	74.8605	133.254	59.2683	100.907	153.873	295.768	81.2307	96.5266	99.5809	1	0	1	0	1	0	0	0
chr4	139579062	139579261	intron (NM_001205173, intron 1 of 8)	4441	Iffo2	2.01227	2.80686e-06	0.000348702	2.39561	2.67661e-08	9.21555e-06	2.04804	1.48911e-06	0.000198282	-0.00344568	0.993026	0.997186	1.22319	0.00129412	0.00632328	28.4078	13.5309	95.6346	98.2544	108.841	147.37	95.3402	103.189	104.95	150.857	202.953	270.591	1	0	1	0	1	0	0	0
chr9	21510437	21510636	promoter-TSS (NM_010744)	-302	Tmed1	1.902	0.0011676	0.0290948	2.39322	4.54592e-05	0.00314482	2.30792	6.35796e-05	0.00361825	-0.971061	0.0790691	0.212755	0.030659	0.952613	0.975377	10.466	5.07408	40.1352	31.1919	49.8433	54.4627	57.0649	40.8382	14.9929	36.7472	59.401	42.8576	1	0	1	0	1	0	0	0
chr4	132748868	132749067	intron (NM_133888, intron 1 of 7)	8204	Smpdl3b	1.77012	0.0181166	0.17606	2.3919	0.0013944	0.0357599	1.84267	0.0130326	0.135254	-1.14681	0.112841	0.274524	0.790567	0.249127	0.434097	2.24272	8.4568	14.11	31.1919	22.3786	49.6572	20.1815	25.8885	2.72597	27.0769	39.6007	45.7988	0	0	1	0	0	0	0	0
chr5	92466088	92466287	intron (NM_007644, intron 2 of 11)	7630	Mir6415	0.27601	0.655417	0.944411	2.39138	6.80841e-05	0.00420742	2.25366	0.000149944	0.00673673	-2.98191	3.99071e-06	7.12438e-05	-4.10796	8.92053e-10	2.21187e-08	14.2039	13.5309	12.8558	23.3939	63.067	105.722	59.8486	90.4275	2.72597	15.4725	2.47504	2.94121	0	0	1	0	1	0	0	1
chr11	97140962	97141161	intron (NM_198100, intron 6 of 8)	5358	Mir7235	1.91708	0.000525812	0.0170732	2.39064	1.54357e-05	0.0014199	1.8805	0.000635324	0.0185127	-0.79502	0.139225	0.317856	0.801015	0.128277	0.273038	32.8933	16.9136	94.3803	124.767	73.2391	238.675	112.738	99.5432	38.1636	135.384	163.353	218.91	1	0	1	0	1	0	0	0
chr1	173451660	173451859	intron (NM_001013779, intron 2 of 8)	31155	Aim2	1.62108	0.00622551	0.0883114	2.38824	5.25771e-05	0.00344337	2.18194	0.0001782	0.00760142	-1.04006	0.0637394	0.181464	-1.44023	0.00953513	0.035187	11.9612	5.07408	30.1014	34.3111	50.8605	62.472	39.6671	56.5172	28.6227	23.2088	9.90016	20.1683	0	0	1	0	1	0	0	0
chr12	33129567	33129766	intron (NR_015602, intron 4 of 5)	17920	F730043M19Rik	1.3205	0.0493377	0.321977	2.38647	0.000340058	0.0135579	1.60209	0.0154318	0.150514	-1.60214	0.0145139	0.0583338	-0.209553	0.736342	0.847618	5.23302	10.1482	20.3811	21.8343	25.4302	70.4812	22.2692	29.5348	12.2669	15.4725	14.8502	27.3112	0	0	1	0	0	0	0	0
chr18	67258542	67258741	Intergenic	-12811	Mppe1	1.38945	0.0521124	0.332353	2.38571	0.0007932	0.0244305	2.35834	0.000798738	0.022004	-1.02755	0.134199	0.310165	-2.02814	0.00343772	0.0147387	2.24272	13.5309	14.7371	31.1919	35.6023	60.8701	36.8834	56.1526	27.2597	15.4725	2.47504	13.4455	0	0	1	0	1	0	0	0
chr15	59641291	59641490	Intergenic	-7264	Trib1	1.44882	0.0458082	0.308688	2.3837	0.000951403	0.02776	2.27454	0.00141264	0.0325158	-1.02267	0.139861	0.318842	-0.750692	0.263275	0.450189	5.9806	5.07408	9.09312	31.1919	33.5679	44.8517	33.4039	37.9212	5.45195	30.945	19.8003	20.1683	0	0	1	0	1	0	0	0
chr12	12278301	12278500	intron (NM_029758, intron 2 of 12)	16261	Fam49a	1.28929	0.0551261	0.343442	2.38199	0.000343675	0.0136428	2.39956	0.000242424	0.00942864	1.43031	0.014959	0.0596799	1.17104	0.0413397	0.116489	2.9903	8.4568	12.2287	20.2747	23.3958	49.6572	22.2692	49.9539	156.744	52.2197	81.6763	93.2783	0	0	1	0	1	0	0	0
chr8	94633608	94633807	intron (NM_026274, intron 6 of 14)	31766	Rspry1	2.21005	0.000849641	0.0233226	2.38085	0.000352447	0.0138007	1.86081	0.00476997	0.0719644	-0.0834694	0.892052	0.951025	0.57897	0.335266	0.526572	5.9806	6.76544	19.754	57.705	32.5507	52.8609	17.3978	39.0151	40.8896	38.6813	27.2254	57.9838	0	0	1	0	0	0	0	0
chr7	126496641	126496840	intron (NM_001347658, intron 10 of 21)	5685	Atxn2l	1.51526	0.0230932	0.205528	2.37637	0.000344453	0.0136428	2.22195	0.000705162	0.0199881	-3.84625	9.2107e-07	2.1175e-05	-2.85436	2.58286e-05	0.000199454	8.22332	8.4568	27.5929	26.5131	28.4819	76.8886	45.9303	45.943	0	3.86813	7.42512	3.78155	0	0	1	0	1	0	0	1
chr9	5298558	5298757	5' UTR (NM_009807, exon 1 of 10)	140	Casp1	2.08631	0.00142253	0.0332859	2.37223	0.000298421	0.012284	2.52342	9.9075e-05	0.00507644	0.305682	0.618366	0.793823	-1.35918	0.0286703	0.0869762	8.22332	10.1482	56.4401	37.4302	86.4628	30.4351	54.9772	76.9363	103.587	44.4835	4.95008	36.555	1	0	1	0	1	0	0	0
chr6	122758834	122759033	Intergenic	-16188	Slc2a3	1.32542	0.03934	0.282809	2.37034	0.000198654	0.00905058	2.37752	0.000143121	0.0065515	1.13761	0.0421905	0.132937	0.451699	0.411492	0.599056	2.9903	10.1482	18.8134	15.5959	35.6023	41.648	27.8365	48.86	129.484	48.3516	49.5008	57.9838	0	0	1	0	1	0	0	0
chr13	45850643	45850842	intron (NM_001199304, intron 3 of 6)	114249	Atxn1	1.83763	0.00030778	0.011859	2.36546	3.42111e-06	0.000457599	1.92786	0.000133101	0.00622886	-0.551149	0.251767	0.472546	0.859712	0.0637099	0.162561	19.4369	15.2222	62.7112	77.9797	72.2219	134.555	68.1995	80.5826	36.8007	102.505	126.227	151.262	1	0	1	0	1	0	0	0
chr12	55027097	55027296	Intergenic	-40860	Baz1a	2.19783	0.000267902	0.0106861	2.36516	9.54231e-05	0.00531744	2.50832	2.69177e-05	0.0018777	0.41116	0.460951	0.676989	0.818244	0.131011	0.276961	1.49515	20.2963	46.7198	59.2645	41.7056	78.4904	70.9832	61.622	104.95	56.0879	113.852	128.993	1	0	1	0	1	0	0	0
chr17	44612553	44612752	intron (NR_073392, intron 6 of 7)	123524	Runx2	1.76061	0.00372931	0.0637928	2.36347	9.83705e-05	0.00545018	2.27393	0.000141087	0.00647685	-1.47885	0.0124758	0.0517498	-1.05657	0.0585139	0.152427	5.9806	11.8395	26.6523	40.5494	39.6712	64.0738	35.4916	59.7988	16.3558	17.4066	19.8003	23.1095	0	0	1	0	1	0	0	0
chr9	40448912	40449111	intron (NM_172768, intron 1 of 19)	6753	Gramd1b	2.33524	4.46822e-05	0.00278986	2.36122	4.46043e-05	0.00311596	1.90418	0.000826788	0.0225285	0.249249	0.625856	0.799309	1.70641	0.000444623	0.0024708	7.47575	6.76544	52.991	32.7515	34.5851	56.0646	20.8774	42.2967	57.2455	50.2857	103.952	118.489	1	0	1	0	1	0	0	0
chr4	148033970	148034169	intron (NM_011929, intron 2 of 22)	4744	Clcn6	2.28202	3.76871e-05	0.00245486	2.36016	2.2459e-05	0.0018893	2.0802	0.000159744	0.00705774	-0.132017	0.799997	0.904031	0.248697	0.626398	0.774136	17.9418	8.4568	59.2621	99.814	72.2219	94.5089	70.9832	64.1744	115.854	32.8791	66.8261	93.2783	1	0	1	0	1	0	0	0
chr18	21009460	21009659	intron (NM_001303011, intron 2 of 4)	7602	Rnf138	1.62738	0.000585794	0.0182288	2.3597	5.79397e-07	0.000110281	2.20839	2.26711e-06	0.000275263	-1.81746	0.000113635	0.0011289	-1.1522	0.0100441	0.0367309	23.9224	23.679	78.389	79.5393	110.876	158.583	118.305	121.785	51.7935	17.4066	42.0757	59.2443	1	0	1	0	1	0	0	1
chr2	44920680	44920879	Intergenic	-59157	Gtdc1	2.18831	0.000197044	0.00846518	2.35734	6.96612e-05	0.00427747	2.84155	9.01998e-07	0.000132961	1.32529	0.0099125	0.0430026	0.744248	0.133148	0.27987	4.48545	10.1482	33.2369	43.6686	39.6712	46.4535	52.1935	70.0084	167.647	58.0219	86.6264	122.69	1	0	1	0	1	0	0	0
chr4	59214720	59214919	intron (NM_011673, intron 5 of 8)	25269	Ugcg	2.66071	5.25884e-06	0.000553015	2.35657	7.02398e-05	0.00429812	2.71396	2.83293e-06	0.000327546	0.340406	0.518652	0.72219	-0.555703	0.280653	0.469772	5.23302	10.1482	41.7029	73.3009	40.6884	49.6572	54.2813	62.3512	77.6903	36.7472	29.7005	45.3786	1	0	1	0	1	0	0	0
chr8	46641422	46641621	Intergenic	24230	Casp3	2.63922	7.06213e-07	0.000119024	2.35603	1.18344e-05	0.00118349	2.49181	2.51994e-06	0.000301404	1.566	0.00118226	0.00774071	1.08363	0.0221976	0.0706819	8.9709	16.9136	85.9143	96.6948	65.1014	83.296	55.6731	106.836	346.199	116.044	165.828	193.7	1	0	1	0	1	0	0	0
chr14	122951755	122951954	intron (NM_028651, intron 5 of 17)	31407	Tmtc4	1.87685	0.00018881	0.00821391	2.35562	2.8217e-06	0.000391964	2.28856	4.39175e-06	0.0004533	-0.959495	0.0484929	0.147492	-1.50486	0.00193645	0.00898631	17.1942	33.8272	105.041	92.016	153.599	126.546	137.095	129.807	107.676	29.011	42.0757	45.7988	1	0	1	0	1	0	0	0
chr18	39008987	39009186	intron (NM_175164, intron 1 of 22)	15941	Arhgap26	1.69986	0.0031479	0.0569753	2.35249	4.27095e-05	0.00302748	1.63146	0.00424614	0.0669302	0.15925	0.764622	0.884057	0.571854	0.278181	0.466981	14.2039	8.4568	36.9996	51.4666	37.6367	105.722	38.9712	43.7552	107.676	50.2857	54.4509	70.589	0	0	1	0	0	0	0	0
chr8	86888064	86888263	Intergenic	-2905	N4bp1	2.15791	0.000995685	0.0260133	2.35211	0.000352347	0.0138007	2.51736	0.000107685	0.00537611	-0.694071	0.269124	0.491562	-0.206892	0.732886	0.845619	11.2136	5.07408	40.4487	56.1454	24.413	88.1015	37.5793	87.1459	44.9786	19.3406	34.6506	69.7487	1	0	1	0	1	0	0	0
chr4	55489357	55489556	Intergenic	43019	Klf4	2.06389	0.00152081	0.0349576	2.35148	0.000336645	0.0134663	2.80736	1.08712e-05	0.000911331	0.840502	0.137425	0.314987	0.467289	0.385995	0.576023	3.73787	5.07408	21.0082	26.5131	23.3958	35.2406	28.5325	52.1417	70.8753	36.7472	42.0757	70.1688	1	0	1	0	1	0	0	0
chr17	51396062	51396261	intron (NR_037250, intron 3 of 4)	52108	C330011F03Rik	1.03073	0.117743	0.515155	2.3491	0.000304668	0.0124771	2.32877	0.000289145	0.0107313	-0.533155	0.386484	0.611619	-0.587923	0.329426	0.520982	7.47575	10.1482	15.9914	24.9535	22.3786	88.1015	50.8017	55.7879	44.9786	27.0769	19.8003	45.3786	0	0	1	0	1	0	0	0
chr14	78459159	78459358	Intergenic	63444	Akap11	1.63205	0.00128032	0.0309653	2.3488	3.38904e-06	0.000456112	2.10302	2.60783e-05	0.00182708	-1.44458	0.00348823	0.0186304	-1.1465	0.016795	0.0563009	18.6894	18.605	59.2621	67.0625	71.2046	142.564	89.0769	87.8751	24.5338	50.2857	29.7005	44.1181	1	0	1	0	1	0	0	0
chr5	10949403	10949602	Intergenic	84473	Gm6455	1.64982	0.0199689	0.186953	2.34838	0.000905274	0.026711	1.98116	0.00455671	0.0699944	-1.45558	0.0351927	0.11561	-2.05984	0.00311134	0.013544	5.23302	5.07408	15.6778	24.9535	39.6712	27.2314	28.5325	22.2422	13.6299	7.73626	2.47504	5.88242	0	0	1	0	0	0	0	0
chr4	126194953	126195152	intron (NM_146153, intron 1 of 10)	7658	Thrap3	1.70382	0.00865773	0.110299	2.34673	0.000295093	0.0121782	2.1295	0.000862508	0.0231789	0.378224	0.520936	0.723948	0.882815	0.123056	0.265039	7.47575	5.07408	22.8896	29.6323	33.5679	51.259	15.3101	55.0587	50.4305	61.8901	44.5507	90.3371	0	0	1	0	0	0	0	0
chr18	32564454	32564653	Intergenic	-4519	Gypc	2.11531	8.95476e-06	0.000828478	2.34619	9.7333e-07	0.000166373	2.85848	1.11376e-09	6.03206e-07	1.72574	4.21965e-05	0.000499989	1.32079	0.00122735	0.00603115	20.1845	6.76544	66.4739	77.9797	68.153	102.518	98.8197	145.851	347.562	239.824	242.554	387.399	1	0	1	0	1	0	1	0
chr5	112301891	112302090	intron (NM_001326590, intron 1 of 5)	-24379	Tfip11	0.914697	0.0927694	0.456559	2.3456	1.30464e-05	0.00127043	1.37263	0.0105154	0.118926	-2.6785	1.83837e-06	3.69837e-05	-0.567884	0.278808	0.467594	21.6797	27.0618	50.169	45.2282	66.1186	211.444	75.1587	59.4342	17.7188	19.3406	29.7005	55.0426	0	0	1	0	0	0	0	1
chr14	25527378	25527577	intron (NM_001310666, intron 2 of 23)	-6962	Mir3075	2.32869	5.52359e-06	0.000571348	2.34522	5.34186e-06	0.000632649	2.18028	1.91622e-05	0.00143425	0.740917	0.121758	0.289768	0.941556	0.0459277	0.126561	16.4466	21.9877	72.745	146.602	74.2563	145.768	112.738	81.3118	267.145	106.374	178.203	205.885	1	0	1	0	1	0	0	0
chr4	88003310	88003509	intron (NM_027326, intron 2 of 10)	29998	Mllt3	1.80517	0.00299874	0.0552121	2.34092	0.000121546	0.00635972	2.28814	0.000128581	0.00610533	1.38102	0.00926279	0.0407703	0.789757	0.128966	0.27408	2.9903	11.8395	24.7709	31.1919	37.6367	44.8517	40.363	38.6505	162.195	63.8241	56.9259	82.3538	0	0	1	0	1	0	0	0
chr13	33077215	33077414	Intergenic	-6789	Serpinb1b	2.30637	7.78557e-05	0.00422386	2.34014	8.28652e-05	0.00480243	2.40926	2.81149e-05	0.00193599	2.61864	1.34823e-08	6.23679e-07	2.78585	1.09815e-10	3.43274e-09	4.48545	3.38272	26.9658	26.5131	23.3958	32.0369	22.9652	34.2749	228.982	135.384	183.153	246.641	1	0	1	0	1	0	1	0
chr8	94178963	94179162	promoter-TSS (NM_013602)	-27	Mt1	1.53978	0.00259363	0.0498723	2.33994	4.30675e-06	0.00053366	1.92484	0.000130767	0.00615907	0.17441	0.708358	0.850488	0.894028	0.0491624	0.133258	19.4369	8.4568	52.991	40.5494	76.2907	94.5089	47.3221	77.6656	102.224	90.901	81.6763	153.783	0	0	1	0	1	0	0	0
chr7	19307501	19307700	intron (NM_001347586, intron 1 of 4)	2445	Fosb	1.00781	0.0594462	0.357508	2.33694	9.2674e-06	0.000981775	0.369686	0.488524	0.835741	-0.50464	0.308488	0.535094	2.42793	7.12588e-07	8.30669e-06	17.9418	11.8395	33.2369	32.7515	50.8605	126.546	25.7488	16.0436	61.3344	59.956	138.602	108.825	0	0	1	0	0	0	0	0
chr8	123478931	123479130	intron (NM_054070, intron 1 of 16)	1168	Afg3l1	2.76845	3.89096e-05	0.00251748	2.33184	0.000674342	0.0216553	2.22644	0.000909979	0.0241707	0.397875	0.508974	0.714445	0.885445	0.122411	0.264039	5.9806	0	42.9572	26.5131	28.4819	22.4258	24.357	22.9715	32.7117	36.7472	29.7005	58.8242	1	0	1	0	1	0	0	0
chr7	66185425	66185624	Intergenic	76009	Chsy1	1.52186	0.00803381	0.104916	2.33118	4.5474e-05	0.00314482	1.91741	0.000676635	0.0193677	-0.40568	0.442517	0.662085	0.901068	0.0731633	0.180827	6.72817	13.5309	30.7285	31.1919	38.654	75.2867	28.5325	53.6002	46.3416	36.7472	74.2512	85.7152	0	0	1	0	1	0	0	0
chr12	25338864	25339063	Intergenic	209789	Gm17746	1.13993	0.106743	0.491079	2.33033	0.000889745	0.0264738	2.19559	0.00159353	0.0351058	-2.2551	0.00160014	0.00988594	-2.00201	0.00380787	0.0160752	11.2136	8.4568	20.0676	31.1919	34.5851	92.907	44.5385	68.5499	2.72597	19.3406	22.2754	5.04207	0	0	1	0	1	0	0	1
chr7	75715111	75715310	intron (NM_029332, intron 17 of 36)	-133128	Klhl25	1.68643	0.0022644	0.045646	2.32754	2.45891e-05	0.00199872	2.42501	7.80191e-06	0.000693852	0.58453	0.240948	0.459148	0.493364	0.309469	0.500848	12.7088	8.4568	37.3132	43.6686	43.74	86.4996	60.5445	77.3009	141.751	54.1538	108.902	91.1775	1	0	1	0	1	0	0	0
chr14	121199208	121199407	intron (NM_134082, intron 2 of 26)	163733	Farp1	2.3489	0.000147391	0.00681163	2.32577	0.000204248	0.00923559	2.58262	2.41891e-05	0.00173101	0.192533	0.729744	0.863001	0.487589	0.355159	0.546159	5.9806	5.07408	27.9065	46.7878	27.4646	44.8517	45.2344	41.2029	49.0675	32.8791	89.1015	40.3366	1	0	1	0	1	0	0	0
chr5	103425073	103425272	promoter-TSS (NM_011204)	-20	Ptpn13	2.50969	1.05257e-09	5.76545e-07	2.32074	2.07356e-08	7.57195e-06	2.35071	9.70055e-09	3.24712e-06	-0.0334461	0.931982	0.970345	-0.211778	0.583961	0.741579	26.1651	54.1235	255.548	218.343	217.683	197.027	257.488	167.364	250.79	152.791	193.053	172.691	1	0	1	0	1	0	0	0
chr9	54612819	54613018	intron (NM_053178, intron 11 of 13)	26407	Idh3a	1.62491	0.00160659	0.0362042	2.32035	6.34523e-06	0.000726491	2.0731	4.3123e-05	0.00271006	-0.593895	0.21663	0.428882	0.451934	0.323647	0.51507	17.9418	8.4568	40.7623	56.1454	72.2219	86.4996	55.6731	75.8424	50.4305	52.2197	61.876	116.388	1	0	1	0	1	0	0	0
chr8	40423676	40423875	promoter-TSS (NM_178395)	-40	Zdhhc2	2.51703	1.05854e-07	2.55118e-05	2.31847	1.14534e-06	0.000190371	2.69326	1.07902e-08	3.53814e-06	-0.909571	0.0479868	0.146374	-2.0979	5.35908e-06	4.94957e-05	35.136	16.9136	215.727	124.767	156.65	140.962	200.423	189.971	109.039	42.5494	37.1256	45.7988	1	0	1	0	1	0	0	0
chr16	49937848	49938047	Intergenic	-42513	Gm6936	2.31147	0.000428428	0.0151179	2.31838	0.000455039	0.0163357	3.09801	1.80177e-06	0.000229297	0.380499	0.531206	0.731465	-0.703316	0.236282	0.418477	8.9709	3.38272	51.4232	32.7515	45.7744	40.0461	37.5793	115.951	84.5052	29.011	29.7005	58.404	1	0	1	0	1	0	0	0
chr13	68588459	68588658	intron (NR_138478, intron 4 of 6)	6348	Fastkd3	2.72897	2.78996e-05	0.00196323	2.31556	0.00046908	0.0167238	2.4699	0.000137902	0.00637921	-0.728278	0.237953	0.455729	-3.06879	4.60973e-06	4.3204e-05	4.48545	6.76544	44.2114	46.7878	40.6884	25.6295	31.3161	43.026	24.5338	13.5384	4.95008	2.52104	1	0	1	0	1	0	0	0
chr1	181928486	181928685	intron (NM_001083121, intron 4 of 13)	-86184	Lbr	0.713792	0.319032	0.788322	2.31237	0.000944374	0.0276218	1.8179	0.00845147	0.103711	0.157645	0.804124	0.906472	0.696355	0.260787	0.447379	4.48545	5.07408	5.64401	14.0363	25.4302	36.8424	22.2692	20.0545	36.8007	32.8791	17.3253	50.4207	0	0	1	0	0	0	0	0
chr6	51270920	51271119	Intergenic	-1109	Mir148a	2.57522	4.81361e-08	1.34692e-05	2.30959	1.44682e-06	0.000226427	2.33664	6.24104e-07	0.000102156	0.102389	0.809592	0.909353	0.262156	0.518225	0.691531	14.9515	8.4568	84.033	82.6584	76.2907	60.8701	75.8546	64.9036	74.9643	73.4944	96.5266	76.0512	1	0	1	0	1	0	0	0
chr1	52034971	52035170	intron (NM_001308266, intron 4 of 24)	26830	Stat4	1.14168	0.0637666	0.372071	2.30908	0.000151486	0.00737976	1.93964	0.00129726	0.0308946	-1.89372	0.00200336	0.0118399	-0.232233	0.680958	0.812387	5.9806	16.9136	26.6523	24.9535	37.6367	88.1015	50.1058	44.1199	12.2669	17.4066	27.2254	49.1602	0	0	1	0	1	0	0	1
chr17	44463791	44463990	Intergenic	272286	Runx2	1.41704	0.0379859	0.277031	2.30314	0.000696055	0.0221168	2.0783	0.00191269	0.0393746	-0.936776	0.148139	0.332043	0.117241	0.848169	0.91694	6.72817	5.07408	15.0507	24.9535	21.3614	56.0646	25.7488	37.9212	10.9039	27.0769	27.2254	41.1769	0	0	1	0	1	0	0	0
chr3	9924739	9924938	Intergenic	-87747	Fabp5	1.34376	0.030587	0.244828	2.30272	0.000191608	0.00878771	2.26584	0.000199458	0.00824552	-0.130065	0.82155	0.916038	-0.105129	0.852097	0.919224	2.9903	18.605	25.0845	31.1919	38.654	76.8886	47.3221	63.4451	68.1494	34.8132	56.9259	47.0593	0	0	1	0	1	0	0	0
chr5	11595349	11595548	intron (NM_001037919, intron 1 of 4)	492	Gm6460	2.07051	0.00201254	0.0422879	2.30058	0.000657924	0.0212983	2.33478	0.000417081	0.0138268	2.39181	4.18997e-05	0.000497451	1.48759	0.00915114	0.0340025	3.73787	5.07408	32.6098	14.0363	36.6195	20.824	33.4039	26.6178	280.775	65.7582	76.7263	104.203	0	0	1	0	1	0	1	0
chr15	58927690	58927889	intron (NM_175151, intron 2 of 11)	5941	Tatdn1	2.45908	4.97255e-06	0.000530281	2.29853	2.39264e-05	0.00196474	1.88626	0.000448542	0.0144687	0.266839	0.591411	0.774694	1.0561	0.0289695	0.0876699	5.9806	20.2963	58.9485	96.6948	53.9121	83.296	59.1527	41.9321	84.5052	81.2307	79.2013	134.875	1	0	1	0	1	0	0	0
chr18	75043987	75044186	intron (NM_027727, intron 2 of 16)	25314	Dym	1.54098	0.00214782	0.0440925	2.29579	4.56947e-06	0.000559029	2.36682	1.83374e-06	0.000231388	-1.47869	0.00276513	0.015439	-1.80727	0.000208761	0.00126607	20.9321	33.8272	81.8381	85.7776	116.979	174.601	132.224	172.833	64.0604	32.8791	17.3253	57.1435	0	0	1	0	1	0	0	0
chr19	21865838	21866037	Intergenic	87597	Tmem2	2.04838	0.00120905	0.0297491	2.2933	0.000313672	0.0127807	2.13998	0.000636796	0.0185127	1.19205	0.0365338	0.119067	1.0318	0.0650111	0.165069	6.72817	6.76544	27.5929	43.6686	21.3614	64.0738	22.9652	51.0478	143.114	59.956	81.6763	80.253	1	0	1	0	1	0	0	0
chr3	109454708	109454907	intron (NM_020505, intron 2 of 26)	114124	Vav3	1.45775	0.00926949	0.114971	2.2929	4.01164e-05	0.00287324	2.38247	1.63784e-05	0.00126114	-1.31622	0.0162519	0.0635959	-2.1383	9.81978e-05	0.000653324	14.9515	25.3704	53.3045	65.5029	88.4972	131.351	102.995	130.172	66.7864	13.5384	14.8502	29.4121	0	0	1	0	1	0	0	0
chr2	166708335	166708534	intron (NR_105783, intron 2 of 2)	5398	Prex1	1.75815	0.000408798	0.014607	2.2927	4.04296e-06	0.000512838	1.70801	0.000551067	0.0167809	-1.403	0.00415052	0.0214155	-0.62279	0.193324	0.364064	34.3884	18.605	89.677	112.291	96.6349	201.832	100.212	93.3445	34.0747	73.4944	44.5507	74.3706	1	0	1	0	1	0	0	0
chr2	93453082	93453281	promoter-TSS (NM_001271462)	362	Gm10804	2.35477	3.63145e-05	0.0023945	2.29014	7.67858e-05	0.00454139	2.55082	5.82728e-06	0.000554017	0.793641	0.107717	0.265531	0.764162	0.101224	0.230215	6.72817	5.07408	32.9234	45.2282	37.6367	35.2406	50.8017	37.9212	61.3344	69.6263	56.9259	93.2783	1	0	1	0	1	0	0	0
chr7	123220187	123220386	intron (NM_146198, intron 1 of 16)	5420	Slc5a11	1.28231	0.0437508	0.300196	2.29012	0.000282879	0.0118568	1.90424	0.00223846	0.0438611	-2.10211	0.00113976	0.00750628	-2.77377	2.40968e-05	0.000187462	7.47575	10.1482	20.6947	26.5131	38.654	60.8701	34.0998	39.3797	6.81494	13.5384	4.95008	3.78155	0	0	1	0	1	0	0	1
chr12	85593068	85593267	Intergenic	-5938	Jdp2	2.21836	7.86303e-06	0.00074171	2.28965	5.08289e-06	0.000616186	2.0352	3.55523e-05	0.00233473	-0.0469613	0.916346	0.962848	0.797961	0.0589597	0.153363	8.9709	13.5309	50.7961	63.9433	60.0153	59.2683	54.2813	45.2138	62.6974	52.2197	84.1514	91.5976	1	0	1	0	1	0	0	0
chr2	72838138	72838337	Intergenic	-24520	6430710C18Rik	1.85095	6.38693e-06	0.000634768	2.28954	2.49994e-08	8.73203e-06	2.47075	1.03363e-09	5.6617e-07	-0.0399819	0.916659	0.963093	0.0752653	0.839336	0.911415	26.1651	33.8272	112.567	113.85	139.358	171.397	151.709	200.18	185.366	114.11	153.453	214.288	1	0	1	0	1	0	0	0
chr14	27390725	27390924	intron (NM_001289686, intron 9 of 12)	29435	Arhgef3	2.4335	2.25029e-05	0.00167131	2.28729	8.3939e-05	0.00483422	2.92874	2.41736e-07	4.58747e-05	-0.336728	0.526809	0.728289	-0.591365	0.23882	0.421594	7.47575	8.4568	36.686	68.6221	42.7228	49.6572	77.9423	69.2791	24.5338	48.3516	34.6506	57.5637	1	0	1	0	1	0	0	0
chr4	86719101	86719300	Intergenic	-29355	Dennd4c	1.98112	0.00271875	0.0514929	2.28628	0.000577575	0.0194746	2.70468	3.18991e-05	0.00214151	0.0139377	0.981679	0.992752	-0.524898	0.371296	0.562328	5.9806	5.07408	17.8727	40.5494	26.4474	44.8517	34.0998	61.622	49.0675	21.2747	39.6007	27.3112	0	0	1	0	1	0	0	0
chr11	70791831	70792030	intron (NM_001045526, intron 4 of 4)	20631	Scimp	1.58555	0.0293339	0.238843	2.28573	0.00165149	0.0404292	1.29496	0.0737352	0.362597	-2.74936	0.000316509	0.00261912	0.102111	0.883543	0.936449	9.71847	6.76544	27.2794	34.3111	20.3442	86.4996	18.7897	29.5348	0	11.6044	37.1256	18.0674	0	0	1	0	0	0	0	1
chr5	125383338	125383537	Intergenic	6580	Ubc	1.21093	0.0291506	0.237954	2.28499	3.2478e-05	0.00245377	1.40901	0.00990664	0.114541	0.110373	0.827667	0.919307	1.8069	0.000252115	0.00149808	14.2039	10.1482	32.2963	31.1919	35.6023	107.324	45.9303	28.4409	73.6013	79.2966	116.327	159.245	0	0	1	0	0	0	0	0
chr5	23416297	23416496	Intergenic	17957	5031425E22Rik	2.08211	8.6311e-05	0.00458695	2.28474	1.84839e-05	0.00161699	2.05294	9.43284e-05	0.00491548	-0.00708746	0.988446	0.995239	0.77927	0.0984692	0.225579	14.9515	8.4568	53.9316	65.5029	38.654	100.916	59.8486	56.1526	81.7792	54.1538	101.477	103.362	1	0	1	0	1	0	0	0
chr3	103872782	103872981	intron (NR_104070, intron 3 of 22)	12604	Ptpn22	2.17932	0.000196041	0.00843711	2.28425	0.000105267	0.00571044	2.17096	0.000185593	0.00781972	0.416737	0.440804	0.660479	1.57213	0.00261053	0.0116544	13.4563	5.07408	31.9827	79.5393	30.5163	88.1015	38.9712	67.8206	76.3273	83.1648	175.728	168.069	1	0	1	0	1	0	0	0
chr10	39479453	39479652	intron (NM_001122893, intron 3 of 13)	109753	Fyn	2.53128	4.07439e-07	7.46743e-05	2.28396	6.38399e-06	0.000728371	2.32316	2.93317e-06	0.00033824	0.260142	0.569562	0.758902	0.442059	0.316929	0.508547	10.466	16.9136	61.7705	115.41	57.9809	88.1015	84.2056	65.2682	73.6013	102.505	113.852	93.6985	1	0	1	0	1	0	0	0
chr1	54578701	54578900	Intergenic	-21116	Pgap1	1.6701	0.0150597	0.155607	2.28053	0.000899309	0.0266407	2.57097	0.000134753	0.00626606	-1.71028	0.0124921	0.0517928	-1.94798	0.00258811	0.0115661	5.9806	5.07408	23.8303	18.7151	36.6195	32.0369	39.6671	45.2138	14.9929	1.93406	12.3752	7.98328	0	0	1	0	1	0	0	0
chr11	86591342	86591541	intron (NM_029478, intron 10 of 11)	-7283	Mir21a	2.33354	3.56471e-05	0.00236025	2.28048	6.29205e-05	0.00395805	2.03449	0.000291326	0.0107853	0.245748	0.636001	0.806304	2.01344	4.92797e-05	0.000355542	14.2039	3.38272	59.5756	57.705	28.4819	86.4996	45.2344	48.86	47.7045	88.967	193.053	218.91	1	0	1	0	1	0	0	0
chr9	21610014	21610213	Intergenic	-1784	Gm7904	1.74169	0.000825044	0.0229173	2.27686	1.2327e-05	0.00121016	1.96113	0.000145488	0.00662845	0.222405	0.650607	0.816099	1.29782	0.00695597	0.0269246	14.2039	28.7531	59.8892	95.1352	68.153	160.185	59.8486	118.868	144.477	121.846	163.353	296.222	1	0	1	0	1	0	0	0
chr6	31218998	31219197	promoter-TSS (NR_110471)	-623	Lncpint	1.89331	0.000173573	0.00771824	2.27628	6.69025e-06	0.000755231	1.99053	6.79688e-05	0.00380937	-1.58352	0.00153391	0.00955157	-1.29918	0.00720398	0.0277418	23.1748	11.8395	59.5756	92.016	78.3251	120.138	96.0361	64.539	27.2597	34.8132	27.2254	33.1936	1	0	1	0	1	0	0	0
chr10	67100856	67101055	Intergenic	-3967	Reep3	2.40909	3.86371e-06	0.000447689	2.27572	1.74629e-05	0.00155304	2.43131	2.48372e-06	0.000297812	0.792549	0.0818506	0.218253	0.597652	0.170338	0.333494	9.71847	6.76544	58.635	46.7878	48.826	48.0554	59.1527	49.5893	92.6831	79.2966	61.876	100.841	1	0	1	0	1	0	0	0
chr1	34852554	34852753	intron (NM_175421, intron 1 of 6)	2694	Plekhb2	2.87339	2.63833e-07	5.29887e-05	2.27143	7.26628e-05	0.00437812	1.57512	0.00519712	0.0759816	1.42987	0.0026617	0.0149655	2.3465	3.42813e-07	4.35652e-06	4.48545	8.4568	51.4232	59.2645	28.4819	43.2498	20.1815	22.2422	118.58	81.2307	91.5765	139.497	1	0	1	0	0	0	0	0
chr13	4771591	4771790	Intergenic	-162526	Akr1e1	1.08939	0.0556148	0.34488	2.27136	5.64192e-05	0.00363572	2.24533	5.74347e-05	0.00336831	0.725234	0.169981	0.365029	-0.0382485	0.942006	0.969033	13.4563	20.2963	27.2794	51.4666	88.4972	96.1107	73.0709	107.2	254.879	58.0219	86.6264	89.0766	0	0	1	0	1	0	0	0
chr10	13832601	13832800	intron (NM_001347362, intron 1 of 5)	36257	Aig1	1.39953	0.0283007	0.233268	2.26972	0.000350032	0.0137694	2.49436	5.05236e-05	0.00305947	2.41341	3.11306e-06	5.78249e-05	2.83578	6.03721e-09	1.20749e-07	5.23302	1.69136	16.6185	7.79797	25.4302	25.6295	16.006	43.3906	169.01	131.516	195.528	282.356	0	0	1	0	0	0	1	0
chr11	116398083	116398282	intron (NM_027258, intron 1 of 18)	14850	Rnf157	2.0968	0.00305807	0.0559386	2.26877	0.00143964	0.0365421	1.90557	0.00676114	0.0901024	-0.783469	0.24852	0.468541	1.84435	0.0037199	0.015766	8.9709	0	21.0082	40.5494	21.3614	48.0554	21.5733	29.8994	5.45195	32.8791	126.227	87.3959	0	0	1	0	0	0	0	0
chr2	163232237	163232436	intron (NM_001098799, intron 1 of 8)	6882	Tox2	2.22285	8.16848e-05	0.00438949	2.26798	7.13161e-05	0.00434037	2.16206	0.000108901	0.00540604	1.12864	0.0217849	0.0796416	1.36281	0.0039884	0.0167244	7.47575	6.76544	39.1945	42.109	47.8088	35.2406	46.6262	31.3579	124.032	65.7582	76.7263	128.573	1	0	1	0	1	0	0	0
chr16	55551005	55551204	Intergenic	56373	Mir5118	0.800476	0.145651	0.567892	2.26765	2.54904e-05	0.00204101	2.76968	1.47512e-07	3.06482e-05	1.79378	0.000159736	0.00148871	1.02863	0.0259001	0.0802385	6.72817	16.9136	16.6185	26.5131	60.0153	62.472	80.726	95.5323	324.391	125.714	155.928	214.708	0	0	1	0	1	0	1	0
chr15	6548988	6549187	Intergenic	-30760	Fyb	1.88704	0.00243227	0.0476781	2.26659	0.000300568	0.0123512	2.35654	0.000111071	0.00549115	1.45	0.00570454	0.0275411	1.28047	0.0104954	0.038092	5.23302	3.38272	21.9489	20.2747	23.3958	33.6387	26.4447	33.5457	110.402	52.2197	86.6264	69.7487	1	0	1	0	1	0	0	0
chr11	116406340	116406539	intron (NM_027258, intron 1 of 18)	6593	Rnf157	2.4848	6.27153e-07	0.00010758	2.2657	6.57472e-06	0.000743931	1.93723	9.94866e-05	0.00508532	0.549495	0.240487	0.458718	2.17683	1.86154e-06	1.95235e-05	29.903	6.76544	105.355	149.721	85.4456	131.351	81.4219	88.2397	103.587	220.483	319.28	503.787	1	0	1	0	1	0	0	0
chr14	25861883	25862082	intron (NM_013469, intron 1 of 14)	19827	Anxa11	1.39254	0.00916125	0.114077	2.26537	1.9968e-05	0.00172182	2.05312	7.88358e-05	0.00428899	1.37344	0.00242269	0.0138593	1.82262	2.88122e-05	0.000219922	8.9709	8.4568	26.6523	24.9535	38.654	60.8701	36.8834	47.0369	171.736	92.8351	143.552	170.17	0	0	1	0	1	0	0	0
chr2	45017255	45017454	intron (NM_001289521, intron 3 of 8)	5823	Mir5129	0.808556	0.202553	0.661655	2.26466	0.00029195	0.0120966	2.45152	7.18746e-05	0.00397761	-1.32115	0.0310358	0.104871	-2.03697	0.000796792	0.00412756	6.72817	18.605	18.1862	28.0727	58.9981	76.8886	44.5385	109.753	29.9857	19.3406	7.42512	22.2691	0	0	1	0	1	0	0	0
chr12	110688860	110689059	Intergenic	-6340	1700001K19Rik	2.11353	0.00233412	0.0465107	2.2638	0.00118345	0.0320088	1.70277	0.0138275	0.140614	-0.484785	0.463468	0.67921	-0.253477	0.698208	0.822801	11.2136	0	29.1607	43.6686	34.5851	46.4535	37.5793	15.3143	17.7188	38.6813	19.8003	22.6893	1	0	1	0	0	0	0	0
chr17	6008722	6008921	intron (NM_001113352, intron 8 of 25)	1241	Synj2	0.363242	0.56312	0.919231	2.2631	0.000235317	0.0103022	1.41477	0.0209743	0.180033	-2.22853	0.000389917	0.00311327	-1.20761	0.0476898	0.130148	20.1845	11.8395	21.9489	21.8343	47.8088	137.759	36.8834	59.7988	23.1708	9.67032	9.90016	25.6305	0	0	1	0	0	0	0	1
chr4	46442576	46442775	Intergenic	-8251	Anp32b	1.14356	0.0894407	0.447361	2.26178	0.00069874	0.0221875	2.32217	0.00041896	0.01387	-0.702599	0.270129	0.492501	-1.33104	0.0350444	0.102044	10.466	5.07408	19.754	21.8343	29.4991	68.8793	29.9243	70.7376	19.0818	38.6813	9.90016	23.9498	0	0	1	0	1	0	0	0
chr2	13407315	13407514	intron (NM_001081084, intron 27 of 66)	84462	Cubn	1.07817	0.0839001	0.43254	2.26067	0.000248483	0.0107785	2.18813	0.000326733	0.0117007	0.176961	0.757921	0.880617	0.200273	0.721942	0.838249	2.24272	20.2963	22.2625	24.9535	44.7572	70.4812	50.1058	57.9757	87.2312	42.5494	56.9259	68.068	0	0	1	0	1	0	0	0
chr14	57712881	57713080	intron (NM_015771, intron 2 of 7)	21438	Lats2	1.45237	0.0130997	0.142987	2.26065	0.000108207	0.00582122	1.76949	0.00232217	0.044881	-1.98906	0.000719278	0.0051402	-2.02393	0.000577764	0.00311445	18.6894	30.4445	64.5925	81.0989	71.2046	195.425	91.8606	91.5214	35.4377	23.2088	2.47504	31.0928	0	0	1	0	1	0	0	1
chr15	59538073	59538272	3' UTR (NM_001164604, exon 5 of 5)	-110482	Trib1	1.4578	0.00667145	0.0921954	2.26041	2.42662e-05	0.0019825	1.59015	0.0027822	0.0507023	-2.02626	0.000193765	0.0017482	-0.67427	0.188843	0.358229	16.4466	20.2963	54.8723	53.0262	55.9465	140.962	54.9772	63.8097	14.9929	29.011	29.7005	40.7567	0	0	1	0	0	0	0	1
chr2	70092749	70092948	intron (NM_177376, intron 2 of 34)	53722	Myo3b	1.66894	0.0055535	0.0824169	2.25989	0.000173706	0.00812121	1.95879	0.000949256	0.0248539	-0.489254	0.381712	0.60769	-0.358118	0.510418	0.684962	6.72817	10.1482	23.8303	37.4302	38.654	54.4627	43.1466	30.9933	36.8007	27.0769	19.8003	34.034	0	0	1	0	1	0	0	0
chr10	13424586	13424785	intron (NM_001195065, intron 1 of 12)	-35715	Phactr2	1.96171	0.000244172	0.00999117	2.25915	2.95763e-05	0.00230313	2.4127	3.99408e-06	0.000418837	2.72764	1.72362e-10	1.73088e-08	2.82557	1.9517e-12	9.55085e-11	3.73787	10.1482	21.9489	38.9898	30.5163	41.648	45.9303	34.6396	271.234	237.89	311.855	298.323	1	0	1	0	1	0	1	0
chr10	28677663	28677862	intron (NR_131208, intron 1 of 3)	9402	Themis	1.3247	0.0429181	0.297169	2.25834	0.000511437	0.0177995	2.60647	4.32518e-05	0.00271109	-1.1399	0.0688075	0.192231	-1.52664	0.0110506	0.0397301	5.9806	8.4568	17.8727	23.3939	31.5335	51.259	30.6202	74.3839	13.6299	21.2747	17.3253	16.3867	0	0	1	0	1	0	0	0
chr2	29678658	29678857	intron (NM_001039087, intron 1 of 25)	59037	Rapgef1	2.05248	0.000447581	0.0155322	2.25665	0.000130328	0.00665474	2.42628	2.5059e-05	0.00177704	0.445912	0.391289	0.615783	1.3893	0.00443774	0.0183345	6.72817	6.76544	32.2963	35.8706	21.3614	59.2683	36.1875	52.5063	46.3416	63.8241	108.902	136.136	1	0	1	0	1	0	0	0
chr7	66197260	66197459	Intergenic	87844	Chsy1	0.865146	0.17689	0.621305	2.25643	0.000389808	0.0147254	1.71325	0.00687462	0.0910307	-2.52191	0.000107044	0.00107562	-2.44219	0.000172022	0.00106867	21.6797	28.7531	54.8723	42.109	85.4456	197.027	90.4688	95.5323	1.36299	40.6153	7.42512	18.0674	0	0	1	0	0	0	0	1
chr14	74880910	74881109	intron (NM_001252132, intron 1 of 18)	66868	Lrch1	2.04588	0.000678173	0.0201283	2.25483	0.000221067	0.00980303	3.10864	1.10112e-07	2.4547e-05	1.79679	0.000250067	0.00215891	1.78624	6.83989e-05	0.000474315	4.48545	3.38272	22.2625	21.8343	24.413	27.2314	33.4039	61.9866	85.8682	106.374	136.127	211.347	1	0	1	0	1	0	1	0
chr4	150808459	150808658	Intergenic	46391	1700045H11Rik	1.14258	0.0304516	0.244142	2.25059	1.66556e-05	0.00150909	2.316	6.87735e-06	0.000632637	0.97668	0.0406972	0.129382	1.18948	0.0106638	0.0385868	18.6894	10.1482	30.4149	43.6686	42.7228	123.342	76.5505	94.803	177.188	156.659	148.502	255.465	0	0	1	0	1	0	0	0
chr13	43246916	43247115	intron (NM_001033399, intron 1 of 1)	57157	Gfod1	1.68848	0.00123975	0.0302728	2.24909	1.7643e-05	0.00156329	1.76995	0.000581471	0.0173784	0.671003	0.137302	0.314764	2.223	2.00063e-07	2.71493e-06	11.2136	5.07408	29.7878	35.8706	37.6367	60.8701	34.7957	33.9103	73.6013	85.0988	153.453	186.557	1	0	1	0	1	0	0	0
chr12	19288351	19288550	Intergenic	773940	5730507C01Rik	0.405477	0.584846	0.925683	2.24841	0.00217164	0.0485968	0.501289	0.49558	0.838557	-1.51545	0.0376681	0.121847	-0.598226	0.418554	0.605514	13.4563	18.605	25.0845	18.7151	25.4302	166.592	42.4507	6.19866	17.7188	40.6153	17.3253	12.6052	0	0	1	0	0	0	0	0
chr2	151572418	151572617	promoter-TSS (NM_145535)	-106	Sdcbp2	2.02207	2.64859e-06	0.000334208	2.24837	1.94264e-07	4.50187e-05	2.10417	8.69858e-07	0.00012941	-0.484641	0.240621	0.458853	-0.0481121	0.905211	0.948708	24.67	47.3581	148.626	154.4	120.031	238.675	182.329	139.288	140.388	110.242	146.027	163.027	1	0	1	0	1	0	0	0
chr14	16269872	16270071	intron (NM_021504, intron 3 of 11)	-20163	Oxsm	2.58275	0.000141055	0.00661132	2.24827	0.00114371	0.0313804	1.23417	0.0720769	0.357919	2.32601	7.32145e-05	0.00079047	2.31546	7.80176e-05	0.000532815	1.49515	6.76544	24.4574	37.4302	24.413	22.4258	13.2224	8.75105	207.174	58.0219	64.3511	60.925	1	0	1	0	0	0	1	0
chr2	132670338	132670537	Intergenic	-19846	1110034G24Rik	2.36821	2.16035e-05	0.00162627	2.24795	6.77528e-05	0.00419771	2.23596	5.35963e-05	0.00319361	0.389993	0.441929	0.661507	0.562832	0.250269	0.43519	11.9612	5.07408	53.6181	59.2645	45.7744	57.6664	31.3161	69.6438	74.9643	61.8901	59.401	91.5976	1	0	1	0	1	0	0	0
chr10	118447710	118447909	Intergenic	6763	Ifng	1.21384	0.0689055	0.388054	2.24777	0.000667638	0.0215136	0.717662	0.280037	0.681435	0.185025	0.752975	0.877345	2.57596	7.27015e-06	6.5028e-05	6.72817	1.69136	12.5422	14.0363	31.5335	25.6295	9.74279	8.38642	36.8007	29.011	79.2013	48.74	0	0	1	0	0	0	0	0
chr6	86548148	86548347	intron (NR_037960, intron 3 of 4)	20846	1600020E01Rik	1.8771	0.00398702	0.0664991	2.24507	0.000591796	0.0197485	1.84231	0.00442032	0.0686431	-0.0821108	0.893927	0.951934	0.924265	0.123543	0.265896	10.466	6.76544	37.6267	42.109	23.3958	83.296	25.7488	51.0478	50.4305	48.3516	32.1755	118.069	0	0	1	0	0	0	0	0
chr12	73723992	73724191	intron (NM_001313977, intron 11 of 14)	139295	Prkch	2.49257	7.74564e-05	0.00421394	2.24413	0.000441997	0.0159709	2.77443	9.01418e-06	0.00078341	-1.81374	0.00479805	0.02404	-1.71823	0.00345663	0.0148051	3.73787	11.8395	39.8216	59.2645	42.7228	38.4443	77.2464	43.3906	6.81494	13.5384	22.2754	13.0254	1	0	1	0	1	0	0	1
chr10	94942844	94943043	intron (NM_018797, intron 1 of 30)	1635	Plxnc1	2.11679	0.000107571	0.00537879	2.2441	4.49915e-05	0.00313674	2.14603	7.56223e-05	0.00415165	-0.129815	0.799908	0.90399	-0.794615	0.119265	0.259038	12.7088	13.5309	69.2959	59.2645	61.0326	81.6941	59.1527	72.5608	98.1351	29.011	32.1755	39.9164	1	0	1	0	1	0	0	0
chr6	32796248	32796447	intron (NM_025336, intron 7 of 7)	-208155	Plxna4	2.06981	0.00302449	0.0555588	2.24267	0.00146257	0.0370248	1.69222	0.0147498	0.14632	-0.751422	0.254026	0.474979	0.511814	0.404574	0.593156	5.23302	1.69136	20.6947	21.8343	24.413	24.0277	15.3101	16.4082	13.6299	13.5384	24.7504	22.6893	0	0	1	0	0	0	0	0
chr14	55098074	55098273	TTS (NM_007455)	3389	Thtpa	1.52091	0.0032878	0.0586194	2.24173	1.41671e-05	0.00133899	1.63298	0.00147229	0.0334474	-1.75195	0.000688755	0.00495365	-0.389693	0.433039	0.618726	32.8933	20.2963	84.6601	84.218	71.2046	217.851	88.381	94.803	32.7117	46.4175	47.0258	86.5556	0	0	1	0	1	0	0	1
chr10	22295902	22296101	intron (NM_009018, intron 5 of 5)	-10719	C920009B18Rik	2.23742	0.000835399	0.0230762	2.24093	0.00089615	0.0265987	2.38827	0.000325084	0.0116921	0.749216	0.227356	0.442413	0.399629	0.511324	0.685664	8.9709	3.38272	31.3556	51.4666	32.5507	49.6572	22.2692	68.1853	100.861	42.5494	29.7005	89.4968	1	0	1	0	1	0	0	0
chr2	152906428	152906627	Intergenic	-4825	Mylk2	1.34846	0.0391022	0.282101	2.24087	0.000567966	0.0192525	1.91267	0.00293478	0.052258	-0.908005	0.146529	0.329676	0.0221128	0.970653	0.985267	12.7088	3.38272	26.3387	24.9535	27.4646	75.2867	29.2284	49.2247	14.9929	36.7472	47.0258	34.8743	0	0	1	0	0	0	0	0
chr6	122269239	122269438	Intergenic	13495	Klrg1	1.86898	0.00352756	0.0616085	2.23994	0.000497511	0.0174028	2.23149	0.000409807	0.0136987	-1.39135	0.0269321	0.0941325	-1.42461	0.0174921	0.0583053	4.48545	10.1482	30.4149	28.0727	27.4646	51.259	43.1466	33.9103	14.9929	11.6044	12.3752	13.4455	0	0	1	0	1	0	0	0
chr9	69940908	69941107	Intergenic	-48459	Bnip2	1.51388	0.00643301	0.0900287	2.23972	5.30383e-05	0.00346886	2.19833	5.77314e-05	0.00337715	-0.16706	0.747526	0.874152	0.989607	0.0471228	0.128999	20.9321	3.38272	34.8047	53.0262	50.8605	97.7126	50.8017	91.1568	68.1494	61.8901	131.177	162.607	0	0	1	0	1	0	0	0
chr11	4824027	4824226	intron (NM_001252251, intron 1 of 16)	9009	Nf2	1.65863	0.00511629	0.0783702	2.2387	0.000158768	0.00762243	1.4163	0.0158834	0.153244	-0.714815	0.198398	0.405288	0.392252	0.462979	0.645305	8.22332	8.4568	27.9065	32.7515	35.6023	57.6664	20.1815	29.5348	27.2597	27.0769	39.6007	29.4121	0	0	1	0	0	0	0	0
chr16	92864316	92864515	Intergenic	-38341	Runx1	1.65693	0.00261637	0.0502046	2.23656	5.134e-05	0.00337884	1.85703	0.000578488	0.017321	2.19891	8.87147e-07	2.05049e-05	3.1513	1.50685e-13	9.85831e-12	5.9806	6.76544	19.4405	29.6323	22.3786	51.259	27.1406	27.347	190.818	160.527	242.554	285.717	0	0	1	0	1	0	1	0
chr9	42141893	42142092	Intergenic	-17703	Sorl1	0.965971	0.140234	0.558135	2.23612	0.000541599	0.0186074	1.7469	0.00632151	0.086115	-2.62695	0.000141156	0.00134493	-2.53895	0.000146814	0.000929927	9.71847	8.4568	13.1694	28.0727	38.654	64.0738	38.2753	32.0872	5.45195	7.73626	4.95008	4.6219	0	0	1	0	0	0	0	1
chr15	78495071	78495270	promoter-TSS (NM_008368)	-104	Il2rb	1.81905	0.000141838	0.0066313	2.23536	2.98937e-06	0.000411696	1.70055	0.000352456	0.0123599	-0.237811	0.606039	0.785327	1.37067	0.00245718	0.01106	41.8642	28.7531	127.617	148.161	88.4972	286.73	119.697	132.36	117.217	197.275	279.68	400.425	1	0	1	0	1	0	0	0
chr11	96912750	96912949	intron (NM_001308183, intron 4 of 12)	3665	Cdk5rap3	1.1118	0.0541096	0.339653	2.23518	9.38678e-05	0.00526144	1.54587	0.00653416	0.0878548	-2.83069	4.36085e-06	7.71949e-05	-0.570719	0.298066	0.488886	14.9515	16.9136	42.6436	29.6323	50.8605	120.138	43.1466	57.9757	9.54091	9.67032	19.8003	42.8576	0	0	1	0	0	0	0	1
chr19	46613223	46613422	intron (NM_001177812, intron 2 of 4)	-10079	Wbp1l	1.98137	0.00130428	0.0313717	2.23251	0.000303174	0.0124371	1.86869	0.00230982	0.0446781	-2.6906	3.56255e-05	0.000437509	-1.06705	0.07461	0.183637	13.4563	16.9136	57.0672	81.0989	37.6367	129.749	53.5854	71.8315	5.45195	15.4725	12.3752	39.4962	1	0	1	0	1	0	0	1
chr16	33769840	33770039	Intergenic	-24098	Muc13	1.3279	0.00295862	0.0545986	2.2315	5.25285e-07	0.000102096	1.63791	0.000210947	0.00858065	-0.787461	0.0672465	0.188883	0.579046	0.167172	0.329316	36.6312	35.5186	83.7194	109.172	102.738	267.508	121.089	118.139	114.491	92.8351	168.303	193.7	0	0	1	0	1	0	0	0
chr10	72620635	72620834	Intergenic	-34112	Zwint	1.8888	0.00331327	0.0589758	2.23024	0.000543424	0.0186568	2.76527	1.33166e-05	0.00108427	1.82963	0.00202901	0.0119592	-0.845728	0.155735	0.313383	10.466	6.76544	42.9572	37.4302	57.9809	46.4535	73.0709	83.4996	350.288	61.8901	17.3253	60.5049	0	0	1	0	1	0	1	0
chr9	96772217	96772416	intron (NR_102296, intron 4 of 4)	6754	C430002N11Rik	2.33275	8.86734e-05	0.00470213	2.22948	0.000234973	0.0102965	2.71525	3.55802e-06	0.000388897	1.4657	0.00360798	0.0191175	0.966882	0.0416133	0.117064	3.73787	6.76544	33.864	28.0727	26.4474	32.0369	34.0998	48.4954	98.1351	71.5604	61.876	102.522	1	0	1	0	1	0	0	0
chr15	96827581	96827780	Intergenic	-127982	Slc38a2	0.515927	0.471807	0.881544	2.22915	0.00153402	0.0383322	1.00355	0.153374	0.525294	-3.68622	4.15294e-06	7.38945e-05	-2.38523	0.00154633	0.00737836	9.71847	10.1482	9.72023	21.8343	29.4991	83.296	18.7897	24.43	2.72597	1.93406	4.95008	2.10086	0	0	1	0	0	0	0	1
chr17	23980499	23980698	Intergenic	-5368	Prss30	1.54311	0.0166616	0.166312	2.22633	0.000540493	0.0185959	1.65383	0.00928838	0.110268	-0.377798	0.527894	0.729077	0.643052	0.263949	0.450923	4.48545	10.1482	18.4998	29.6323	23.3958	56.0646	20.8774	29.5348	24.5338	34.8132	39.6007	42.4374	0	0	1	0	0	0	0	0
chr7	66116102	66116301	intron (NM_001081163, intron 1 of 2)	6686	Chsy1	1.47087	0.00525653	0.0796778	2.22585	2.26319e-05	0.00189722	1.87119	0.000308855	0.0113126	-0.396565	0.420163	0.642291	0.318257	0.503389	0.679249	14.9515	13.5309	43.5843	43.6686	50.8605	102.518	49.4099	67.0914	73.6013	38.6813	64.3511	81.5135	0	0	1	0	1	0	0	0
chr15	81819706	81819905	intron (NM_017376, intron 2 of 3)	8391	Tef	1.00753	0.167445	0.606173	2.22446	0.00207129	0.047139	1.62729	0.023149	0.191263	-1.26212	0.074406	0.203687	0.31517	0.640678	0.784481	6.72817	6.76544	12.2287	20.2747	20.3442	62.472	18.7897	32.0872	9.54091	21.2747	12.3752	49.1602	0	0	1	0	0	0	0	0
chr19	24174137	24174336	promoter-TSS (NM_001198985)	-96	Tjp2	2.43753	1.77834e-06	0.000249185	2.22104	1.70924e-05	0.00153542	1.8915	0.000202101	0.00831201	-0.451994	0.347218	0.574349	0.243643	0.597583	0.752061	8.22332	20.2963	84.033	77.9797	83.4112	54.4627	63.3281	46.3076	53.1565	46.4175	54.4509	73.5302	1	0	1	0	1	0	0	0
chr11	60935369	60935568	intron (NM_008928, intron 1 of 11)	3411	Map2k3	2.49078	1.81502e-08	6.22808e-06	2.21973	6.37124e-07	0.000117665	1.92657	1.29864e-05	0.00106277	-0.435524	0.307292	0.533789	1.27223	0.00206117	0.00949144	37.3787	27.0618	204.438	199.628	102.738	232.268	112.738	155.696	91.3201	152.791	279.68	389.92	1	0	1	0	1	0	0	0
chr9	77671095	77671294	Intergenic	34462	Klhl31	0.323021	0.583855	0.925581	2.21788	0.000115038	0.00607343	2.12043	0.000193892	0.00807776	-2.79178	5.95664e-06	9.99381e-05	-4.1191	2.13243e-10	6.20323e-09	8.9709	27.0618	26.0251	15.5959	70.1874	107.324	75.1587	88.2397	8.17792	13.5384	2.47504	3.36138	0	0	1	0	1	0	0	1
chr14	121999682	121999881	intron (NM_026861, intron 7 of 8)	-34588	Gpr183	2.24969	9.87056e-06	0.000890976	2.21763	1.60095e-05	0.00146988	2.10685	3.06659e-05	0.00208485	0.374089	0.422621	0.64425	0.497512	0.272833	0.460837	11.9612	15.2222	49.2283	98.2544	57.9809	83.296	55.6731	73.29	111.765	71.5604	103.952	84.0345	1	0	1	0	1	0	0	0
chr10	117530853	117531052	Intergenic	-98548	Cpm	1.99272	0.000213134	0.00898818	2.2169	4.39947e-05	0.0030913	2.28385	1.65257e-05	0.00127045	0.247252	0.608781	0.787321	-0.278446	0.553719	0.718661	11.9612	5.07408	43.2707	40.5494	43.74	56.0646	52.1935	51.777	57.2455	61.8901	34.6506	47.8997	1	0	1	0	1	0	0	0
chr8	68112349	68112548	Intergenic	-137874	Psd3	2.44532	0.000262215	0.010524	2.21349	0.00110977	0.030814	1.88167	0.00487503	0.0729577	-1.43571	0.0313752	0.105811	-2.48326	0.000320928	0.00185129	5.23302	6.76544	38.8809	40.5494	40.6884	25.6295	18.0938	33.1811	12.2669	9.67032	2.47504	3.78155	1	0	1	0	0	0	0	0
chr16	76355349	76355548	intron (NM_173440, intron 1 of 3)	17601	Nrip1	1.81086	0.00124873	0.0303958	2.21195	8.52534e-05	0.00489212	2.34072	2.26077e-05	0.00164365	1.74246	0.000496588	0.00379885	1.1605	0.0176949	0.0588349	7.47575	13.5309	39.5081	42.109	74.2563	33.6387	44.5385	75.1132	276.686	114.11	165.828	118.909	1	0	1	0	1	0	1	0
chr5	149247890	149248089	Intergenic	-17015	Alox5ap	0.691054	0.331792	0.798698	2.21162	0.00174949	0.0420803	-1.40037	0.0541678	0.308373	-0.628455	0.365269	0.59194	1.53383	0.0349972	0.10193	15.6991	25.3704	49.8554	18.7151	71.2046	160.185	9.04688	4.0109	111.765	29.011	44.5507	5.46224	0	0	1	0	0	0	0	0
chr16	44362017	44362216	intron (NM_144550, intron 4 of 17)	14715	Spice1	1.48811	0.00349732	0.0612342	2.2111	1.36188e-05	0.00130768	2.37509	2.18063e-06	0.000266103	0.699484	0.138783	0.317188	0.312654	0.501283	0.677591	14.9515	25.3704	38.8809	84.218	83.4112	120.138	99.5157	128.349	227.619	108.308	111.377	171.851	0	0	1	0	1	0	0	0
chr11	46086609	46086808	intron (NM_001291890, intron 3 of 22)	-15562	Mir8100	1.80438	0.000564446	0.0178644	2.21078	2.50403e-05	0.0020083	2.25772	1.24096e-05	0.00102077	-2.94649	4.47824e-07	1.17635e-05	-1.86836	0.000218113	0.00131797	12.7088	20.2963	66.1603	54.5858	70.1874	94.5089	68.1995	100.272	10.9039	5.80219	14.8502	25.2104	1	0	1	0	1	0	0	1
chr2	33035407	33035606	intron (NM_178888, intron 8 of 28)	51698	Garnl3	1.34693	0.0560824	0.346367	2.20996	0.00163591	0.0401497	1.97045	0.00446643	0.0690035	-1.44004	0.0374231	0.121244	-0.319102	0.624121	0.772558	5.23302	8.4568	10.9745	31.1919	31.5335	46.4535	34.7957	29.5348	14.9929	9.67032	9.90016	36.555	0	0	1	0	0	0	0	0
chr5	147059357	147059556	intron (NM_080795, intron 1 of 9)	17116	Lnx2	1.81432	0.00171148	0.0379469	2.20705	0.000157135	0.00756665	2.30658	4.42411e-05	0.00275875	1.94825	3.35522e-05	0.000415369	2.06219	2.84179e-06	2.8162e-05	2.9903	8.4568	23.5167	18.7151	27.4646	30.4351	27.1406	34.6396	136.299	100.571	148.502	129.833	0	0	1	0	1	0	1	0
chr2	102981495	102981694	Intergenic	-79929	Cd44	1.76769	0.00465704	0.0738174	2.20537	0.000469522	0.0167272	2.65377	1.1731e-05	0.0009783	2.71916	3.98544e-08	1.55552e-06	2.38184	2.05827e-07	2.78844e-06	4.48545	1.69136	18.8134	10.9172	21.3614	22.4258	23.6611	36.8273	203.085	114.11	160.878	182.775	0	0	1	0	1	0	1	0
chr4	8839596	8839795	intron (NM_001277149, intron 17 of 37)	149289	Chd7	2.34244	4.44714e-07	8.05868e-05	2.20422	2.67371e-06	0.000376837	2.33945	3.70091e-07	6.75307e-05	0.428549	0.311241	0.538107	1.06459	0.00848939	0.0318795	14.2039	18.605	85.2872	96.6948	56.9637	108.925	68.8955	110.847	113.128	110.242	190.578	197.901	1	0	1	0	1	0	0	0
chr9	82967336	82967535	intron (NM_001081216, intron 4 of 39)	8054	Phip	0.929658	0.128798	0.536841	2.20147	0.000259364	0.0111409	2.25406	0.000138835	0.00640393	1.05968	0.049964	0.150928	0.680458	0.197743	0.369699	10.466	5.07408	24.4574	7.79797	43.74	48.0554	43.1466	51.777	143.114	56.0879	76.7263	80.6731	0	0	1	0	1	0	0	0
chr10	127070251	127070450	promoter-TSS (NR_040660)	-89	Tspan31	1.4795	0.00411955	0.0680968	2.20107	1.87541e-05	0.00163765	1.68516	0.000931599	0.0245182	-1.09298	0.0280533	0.0970937	-0.085994	0.856884	0.921933	14.2039	20.2963	46.4063	56.1454	60.0153	113.731	50.1058	67.456	49.0675	27.0769	59.401	52.5216	0	0	1	0	1	0	0	0
chr10	8130784	8130983	Intergenic	-174760	Tab2	1.78687	0.00522676	0.0794263	2.20016	0.000616306	0.0203613	2.05201	0.00113021	0.0280817	1.62622	0.00385615	0.0201818	1.49819	0.00628414	0.0246768	3.73787	8.4568	31.9827	14.0363	42.7228	22.4258	25.7488	33.1811	162.195	58.0219	84.1514	95.7994	0	0	1	0	1	0	1	0
chr19	16328114	16328313	intron (NM_008139, intron 3 of 6)	-13209	Mir496b	2.49968	2.50833e-05	0.00180189	2.1962	0.000273014	0.0115843	1.41897	0.0173551	0.161825	-0.167811	0.759256	0.881143	1.3222	0.0111373	0.0399951	4.48545	10.1482	38.2538	56.1454	41.7056	32.0369	25.7488	16.4082	32.7117	32.8791	49.5008	60.0847	1	0	1	0	0	0	0	0
chr5	77130389	77130588	Intergenic	-15365	Hopx	1.68804	0.000606287	0.0186856	2.19161	8.58045e-06	0.000923202	2.23119	4.71148e-06	0.000477106	0.021977	0.962613	0.984485	-0.0987182	0.830902	0.906278	26.9127	27.0618	98.143	90.4564	84.4284	190.62	95.3402	184.501	181.277	94.7691	103.952	154.203	1	0	1	0	1	0	0	0
chr5	118817652	118817851	Intergenic	-134588	4930413E15Rik	2.05054	0.000897168	0.0241459	2.19087	0.000433427	0.0157725	0.973509	0.117143	0.460226	-0.0176994	0.975229	0.990126	1.37761	0.0139359	0.0481809	5.23302	10.1482	30.7285	42.109	39.6712	40.0461	23.6611	9.11568	43.6156	34.8132	42.0757	47.0593	1	0	1	0	0	0	0	0
chr10	85161824	85162023	intron (NM_007771, intron 1 of 12)	23131	Cry1	2.41589	2.17189e-05	0.00163067	2.19078	0.000146639	0.00724211	2.71922	1.36097e-06	0.000183245	0.245433	0.637573	0.807491	-1.06298	0.0379253	0.108568	7.47575	10.1482	39.8216	71.7413	48.826	43.2498	62.6322	72.9254	76.3273	32.8791	29.7005	31.9331	1	0	1	0	1	0	0	0
chr7	140999495	140999694	Intergenic	11150	Ifitm3	2.35192	3.94324e-05	0.00254107	2.19068	0.00014993	0.00735193	2.16155	0.000145593	0.00662845	1.12705	0.0321753	0.107785	1.96223	0.000123643	0.00079987	13.4563	6.76544	62.7112	68.6221	22.3786	96.1107	38.2753	74.7485	132.21	135.384	190.578	289.499	1	0	1	0	1	0	0	0
chr1	16747343	16747542	Intergenic	58986	Ly96	2.273	0.000358428	0.0132492	2.18729	0.000670181	0.0215646	2.43013	0.000118969	0.00574228	-0.922596	0.134766	0.31102	-2.24807	0.000306971	0.00177865	7.47575	8.4568	31.042	63.9433	43.74	43.2498	45.2344	58.3403	34.0747	7.73626	9.90016	8.82363	1	0	1	0	1	0	0	0
chr7	74587624	74587823	Intergenic	-32943	Slco3a1	1.31675	0.0613408	0.364087	2.18726	0.00178396	0.0426619	1.8282	0.00818079	0.101684	-1.97632	0.00565188	0.0273553	-1.48198	0.0286322	0.0868988	3.73787	10.1482	15.9914	21.8343	32.5507	40.0461	25.7488	28.8055	4.08896	11.6044	4.95008	10.5043	0	0	1	0	0	0	0	1
chr9	104407975	104408174	Intergenic	-18039	Mir2136	1.13717	0.0568028	0.348924	2.1865	0.000216381	0.00966636	1.94102	0.000846973	0.0229101	0.322683	0.548608	0.74415	-0.205359	0.700541	0.824261	8.22332	10.1482	27.9065	14.0363	36.6195	60.8701	34.7957	45.2138	79.0533	42.5494	34.6506	34.4542	0	0	1	0	1	0	0	0
chr12	51847889	51848088	Intergenic	-18452	Hectd1	0.885399	0.189396	0.640568	2.18576	0.00106316	0.0299247	2.04929	0.0019556	0.0399931	-1.4033	0.0335455	0.11133	-1.54816	0.0175313	0.0584157	10.466	13.5309	18.1862	31.1919	26.4474	105.722	43.1466	73.6547	29.9857	13.5384	7.42512	24.7902	0	0	1	0	1	0	0	0
chr10	13057065	13057264	Intergenic	-33624	Plagl1	1.54614	0.0101938	0.121819	2.18571	0.000284693	0.0118915	2.55727	1.1764e-05	0.000979359	1.00576	0.0501467	0.151348	1.69439	0.000383863	0.00216739	6.72817	3.38272	21.6354	15.5959	28.4819	33.6387	30.6202	49.9539	47.7045	83.1648	168.303	115.127	0	0	1	0	1	0	0	0
chr7	81179517	81179716	Intergenic	-34188	Pde8a	1.22121	0.0270211	0.226965	2.18408	7.03542e-05	0.00429812	1.88202	0.000555188	0.016884	-0.340755	0.518821	0.722279	0.843749	0.101849	0.231157	29.1554	11.8395	40.4487	70.1817	53.9121	169.796	57.0649	119.233	92.6831	79.2966	153.453	176.052	0	0	1	0	1	0	0	0
chr9	58580904	58581103	Intergenic	-1237	Nptn	2.06328	0.00056997	0.0179899	2.18374	0.000292816	0.0121049	1.79417	0.00258282	0.0483419	-0.200871	0.721223	0.857861	0.963337	0.0751246	0.184574	8.9709	10.1482	36.3725	59.2645	27.4646	76.8886	25.7488	50.3185	31.3487	58.0219	76.7263	80.253	1	0	1	0	1	0	0	0
chr17	12165423	12165622	intron (NM_026644, intron 2 of 8)	46238	Agpat4	2.17411	0.000163722	0.00739618	2.18324	0.000197737	0.00903268	1.39694	0.0156425	0.151679	2.70138	1.49674e-08	6.7934e-07	3.73286	8.41767e-16	9.96925e-14	7.47575	1.69136	22.576	40.5494	31.5335	28.8332	13.9183	19.6899	287.59	143.121	269.779	247.062	1	0	1	0	0	0	1	0
chr1	134074745	134074944	TTS (NM_007570)	4311	Btg2	1.19224	0.0774729	0.413778	2.18107	0.00116496	0.0317251	1.33806	0.0454102	0.27987	-1.75114	0.00929114	0.0408587	-1.91845	0.00518391	0.0209281	20.9321	1.69136	34.8047	28.0727	41.7056	94.5089	36.1875	34.6396	12.2669	23.2088	12.3752	5.04207	0	0	1	0	0	0	0	1
chr2	78973891	78974090	Intergenic	104943	Ube2e3	1.88374	0.00593093	0.0856192	2.17941	0.00153893	0.0383951	1.71335	0.0116534	0.126373	0.265368	0.674449	0.831219	0.433029	0.485777	0.663929	8.22332	1.69136	26.6523	24.9535	28.4819	36.8424	27.1406	18.596	62.6974	15.4725	29.7005	33.1936	0	0	1	0	0	0	0	0
chr16	49772740	49772939	Intergenic	73545	Ift57	1.94124	0.0012167	0.0298765	2.17891	0.000300335	0.0123512	2.70873	4.86995e-06	0.000483006	-0.368916	0.517938	0.721676	-1.44467	0.0103039	0.0375326	15.6991	5.07408	48.9147	51.4666	52.8949	67.2775	61.9363	114.493	51.7935	38.6813	9.90016	44.5383	1	0	1	0	1	0	0	0
chr8	123797936	123798135	Intergenic	-7961	Rab4a	1.62335	0.00954813	0.116942	2.17836	0.000507298	0.0176938	2.20003	0.000362549	0.0126177	-1.2777	0.0370685	0.120403	-0.712492	0.218853	0.396868	13.4563	3.38272	31.6692	34.3111	36.6195	64.0738	47.3221	53.6002	14.9929	23.2088	14.8502	40.3366	0	0	1	0	1	0	0	0
chr12	110690052	110690251	TTS (NM_010480)	6244	Hsp90aa1	1.29969	0.068892	0.388054	2.17732	0.00222795	0.0493528	0.893023	0.209647	0.604725	-1.43048	0.0427384	0.134277	0.306647	0.658173	0.796316	17.9418	3.38272	17.5591	49.907	40.6884	89.7033	38.2753	9.84493	13.6299	29.011	39.6007	22.6893	0	0	1	0	0	0	0	0
chr15	64209029	64209228	intron (NM_010026, intron 3 of 30)	103545	Asap1	1.73379	0.0102227	0.121938	2.17728	0.00130464	0.0340109	1.86382	0.00516381	0.0757013	-0.0340281	0.956418	0.981567	0.52877	0.378317	0.568833	2.24272	10.1482	19.1269	26.5131	23.3958	40.0461	22.9652	26.2531	23.1708	38.6813	24.7504	46.219	0	0	1	0	0	0	0	0
chr2	172390393	172390592	Intergenic	-3302	Cass4	1.85296	0.00114334	0.0286739	2.17056	0.000150531	0.00735217	2.30825	3.88745e-05	0.0024918	-0.643798	0.231679	0.448023	-0.962379	0.0642099	0.163515	10.466	8.4568	50.4825	26.5131	40.6884	60.8701	55.6731	55.4233	36.8007	25.1428	24.7504	28.9919	1	0	1	0	1	0	0	0
chr6	134067642	134067841	intron (NM_001303102, intron 2 of 8)	32041	Etv6	1.99547	0.000748731	0.0214951	2.16543	0.000279793	0.0117684	2.67434	4.59116e-06	0.000469858	0.619086	0.253908	0.474861	0.14193	0.787099	0.879782	2.24272	18.605	34.1776	53.0262	54.9293	41.648	70.9832	70.373	96.7721	56.0879	66.8261	88.6564	1	0	1	0	1	0	0	0
chr13	106691894	106692093	Intergenic	244922	Ipo11	1.79335	0.00491035	0.0764252	2.16542	0.000711473	0.0224762	2.19068	0.000499926	0.0156337	-0.0631652	0.915631	0.96237	-0.870057	0.142013	0.293073	2.9903	15.2222	35.1183	31.1919	60.0153	27.2314	44.5385	45.2138	54.5195	29.011	19.8003	25.6305	0	0	1	0	1	0	0	0
chr9	45058482	45058681	intron (NM_001093749, intron 1 of 5)	3400	Mpzl3	1.63281	0.00413014	0.0682047	2.16491	0.000154144	0.00745989	2.00108	0.000321684	0.0116278	1.18725	0.0126129	0.0521545	2.90402	4.4562e-11	1.54198e-09	5.23302	6.76544	23.2031	18.7151	24.413	40.0461	32.7079	24.0654	57.2455	94.7691	210.378	248.322	0	0	1	0	1	0	0	0
chr15	54920126	54920325	promoter-TSS (NM_001285995)	-79	Enpp2	1.06431	0.0645245	0.374318	2.16487	0.000150545	0.00735217	2.31852	4.00357e-05	0.00255601	-0.654056	0.234767	0.451729	-1.34698	0.0137242	0.0475583	10.466	25.3704	40.7623	35.8706	88.4972	86.4996	70.2873	124.702	84.5052	21.2747	32.1755	38.6559	0	0	1	0	1	0	0	0
chr6	99811456	99811655	Intergenic	-85163	Prok2	1.20665	0.0667122	0.381265	2.16449	0.000929328	0.0272644	2.28228	0.000393364	0.0133434	-0.439663	0.478398	0.690763	-0.649759	0.283084	0.472611	13.4563	1.69136	22.8896	21.8343	34.5851	59.2683	52.1935	49.2247	51.7935	13.5384	32.1755	30.2524	0	0	1	0	1	0	0	0
chr13	95696821	95697020	promoter-TSS (NM_010170)	0	F2rl2	0.757478	0.18654	0.635816	2.16386	0.000132338	0.00670057	1.93925	0.000547165	0.0167245	-0.133306	0.805342	0.907159	0.274816	0.605322	0.757922	15.6991	21.9877	23.5167	45.2282	47.8088	144.166	64.72	95.5323	113.128	58.0219	66.8261	126.472	0	0	1	0	1	0	0	0
chr15	96640649	96640848	intron (NM_001166458, intron 1 of 15)	1214	Slc38a1	2.45609	1.87842e-10	1.39298e-07	2.1587	2.97756e-08	9.76356e-06	2.1046	4.29237e-08	1.14945e-05	-0.422133	0.252128	0.472925	-0.0323009	0.92795	0.961378	37.3787	33.8272	249.591	166.876	159.702	181.009	174.674	152.779	129.484	121.846	128.702	185.716	1	0	1	0	1	0	0	0
chr1	52374786	52374985	Intergenic	125563	Nab1	1.68551	0.00694857	0.095017	2.15798	0.000558704	0.0190205	1.89697	0.00212624	0.042357	-0.127037	0.828789	0.919779	-0.0602754	0.916815	0.954828	2.9903	18.605	32.2963	40.5494	36.6195	67.2775	33.4039	50.6832	54.5195	38.6813	29.7005	48.74	0	0	1	0	1	0	0	0
chr12	33174224	33174423	intron (NM_028139, intron 2 of 3)	26637	Atxn7l1	2.35243	0.000645549	0.0195059	2.15758	0.00205105	0.0468553	2.29635	0.000783832	0.0217015	0.380151	0.546148	0.742359	-1.20805	0.0576362	0.150587	5.9806	1.69136	36.3725	20.2747	23.3958	27.2314	29.2284	26.6178	32.7117	34.8132	4.95008	14.2859	1	0	1	0	1	0	0	0
chr16	17085539	17085738	TTS (NM_144954)	15499	Ypel1	1.4008	0.0341307	0.261013	2.15688	0.00107031	0.0300648	1.48834	0.0229488	0.190425	-2.79055	8.51509e-05	0.000893241	-1.29349	0.0462896	0.127318	8.9709	11.8395	26.0251	35.8706	41.7056	67.2775	41.7548	23.7008	4.08896	7.73626	22.2754	5.88242	0	0	1	0	0	0	0	1
chr11	53810344	53810543	intron (NR_033332, intron 3 of 3)	39970	Irf1	0.709596	0.315377	0.785308	2.1567	0.00195393	0.0454114	1.23191	0.0755251	0.366908	-1.68277	0.0157896	0.0622672	0.390151	0.554396	0.719153	7.47575	10.1482	10.6609	21.8343	21.3614	75.2867	16.7019	29.5348	6.81494	19.3406	24.7504	36.9752	0	0	1	0	0	0	0	0
chr9	56104372	56104571	intron (NM_011193, intron 1 of 14)	14495	Pstpip1	2.33342	4.37052e-06	0.00048731	2.15641	2.90662e-05	0.00227075	1.72565	0.000664852	0.0191098	1.44353	0.00127335	0.00821437	2.85754	3.48592e-11	1.2355e-09	14.2039	5.07408	56.1265	68.6221	36.6195	73.6849	30.6202	48.1308	147.203	162.461	254.929	368.491	1	0	1	0	1	0	0	0
chr6	140466362	140466561	intron (NM_144920, intron 3 of 30)	42362	Plekha5	2.02902	0.000198918	0.00853045	2.15339	9.02098e-05	0.00510363	2.22975	3.53646e-05	0.00232557	0.34484	0.489805	0.699961	-0.643624	0.194198	0.365183	8.9709	13.5309	52.3638	48.3474	68.153	41.648	56.369	60.5281	91.3201	50.2857	24.7504	44.5383	1	0	1	0	1	0	0	0
chr1	164975863	164976062	Intergenic	-40452	Xcl1	1.94389	0.00231666	0.046316	2.15013	0.000833754	0.0252917	2.69315	1.72018e-05	0.00131532	1.21854	0.0315873	0.10631	-0.201508	0.715988	0.834275	5.9806	5.07408	25.0845	29.6323	25.4302	38.4443	23.6611	70.0084	98.1351	58.0219	37.1256	43.698	1	0	1	0	1	0	0	0
chr1	60913421	60913620	intron (NM_009843, intron 3 of 3)	4495	Ctla4	2.30915	2.41722e-06	0.000311537	2.14981	1.39924e-05	0.00133216	1.59077	0.00115354	0.0284561	0.489685	0.280661	0.505206	1.31059	0.00314443	0.0136733	21.6797	10.1482	78.389	110.731	80.3595	86.4996	77.9423	34.2749	119.943	117.978	133.652	152.523	1	0	1	0	1	0	0	0
chrX	57184935	57185134	Intergenic	-15603	Gm14718	1.34524	0.0388549	0.281172	2.14562	0.000938814	0.0275092	2.66989	2.4044e-05	0.00172466	-0.789681	0.198349	0.405222	-0.90306	0.115379	0.253002	6.72817	5.07408	19.754	15.5959	29.4991	36.8424	38.9712	57.6111	20.4448	15.4725	14.8502	31.5129	0	0	1	0	1	0	0	0
chr12	85478844	85479043	Intergenic	5042	Fos	1.78885	0.00801355	0.104812	2.14051	0.00155582	0.0386565	1.22415	0.0689415	0.349692	-0.774465	0.235216	0.452321	0.526667	0.407967	0.596066	14.9515	0	47.347	21.8343	37.6367	56.0646	18.0938	27.7117	19.0818	32.8791	39.6007	30.6726	0	0	1	0	0	0	0	0
chr15	78493670	78493869	intron (NM_008368, intron 1 of 9)	1297	Il2rb	2.35891	1.47528e-05	0.00122606	2.14034	9.22333e-05	0.0051998	1.57706	0.00377126	0.0617258	0.00387899	0.994133	0.99761	2.10693	4.68817e-05	0.000340381	32.8933	16.9136	102.846	202.747	61.0326	198.629	82.8137	86.7812	66.7864	193.406	326.705	475.215	1	0	1	0	0	0	0	0
chr15	66806423	66806622	intron (NM_001029841, intron 1 of 7)	25307	Sla	1.26365	0.0191951	0.182386	2.13841	6.67174e-05	0.0041603	1.08753	0.0412542	0.26535	1.25518	0.00722721	0.0333492	3.02892	3.37961e-11	1.20409e-09	8.22332	11.8395	26.3387	24.9535	29.4991	70.4812	21.5733	23.7008	144.477	98.6373	175.728	232.355	0	0	1	0	0	0	0	0
chr11	79130138	79130337	intron (NM_013571, intron 1 of 17)	16117	Ksr1	1.74502	0.000980972	0.0257823	2.13692	5.79412e-05	0.00371394	1.44356	0.00603351	0.0835231	1.01423	0.0335546	0.111337	2.89478	4.09789e-10	1.11031e-08	15.6991	6.76544	43.2707	48.3474	42.7228	80.0923	23.6611	48.4954	95.4091	160.527	242.554	355.466	1	0	1	0	0	0	0	0
chr7	29025684	29025883	intron (NM_009109, intron 89 of 105)	42929	Map4k1	1.93614	0.000115919	0.00571905	2.13435	2.34274e-05	0.00193365	1.62582	0.00114399	0.0283218	0.458061	0.330672	0.557641	1.49213	0.00121113	0.00595763	17.9418	21.9877	80.2703	87.3372	80.3595	113.731	89.7729	44.4845	110.402	160.527	113.852	273.953	1	0	1	0	1	0	0	0
chr11	117242875	117243074	intron (NM_001113486, intron 2 of 11)	-23272	2009-09-01	1.27567	0.0594323	0.357508	2.13355	0.0015331	0.038329	1.57066	0.0184207	0.167264	-0.802895	0.214175	0.425508	1.12708	0.0651586	0.165365	7.47575	6.76544	19.1269	21.8343	26.4474	52.8609	32.012	19.3252	12.2669	30.945	27.2254	87.8161	0	0	1	0	0	0	0	0
chr12	117412833	117413032	Intergenic	-75920	Gm5441	2.59495	2.16264e-05	0.00162627	2.1312	0.000611849	0.0202696	1.70251	0.00540599	0.0780179	1.29706	0.0182503	0.0694608	1.45671	0.00674389	0.0262343	7.47575	5.07408	46.0927	54.5858	45.7744	24.0277	36.1875	16.0436	128.121	56.0879	91.5765	63.0259	1	0	1	0	0	0	0	0
chr3	95053817	95054016	Intergenic	-11302	Psmd4	1.26086	0.0580923	0.353485	2.12973	0.00128613	0.0337099	1.50109	0.0215725	0.183361	-0.785652	0.211073	0.421428	0.473835	0.424864	0.611322	6.72817	5.07408	16.6185	17.1555	21.3614	44.8517	18.7897	21.513	14.9929	21.2747	27.2254	30.2524	0	0	1	0	0	0	0	0
chr15	78594925	78595124	Intergenic	-2023	Cyth4	1.3912	0.0248345	0.215844	2.12685	0.00058944	0.0197033	1.67154	0.00664896	0.0890012	-1.89221	0.00240086	0.0137573	-0.205643	0.732056	0.845005	34.3884	10.1482	68.6688	67.0625	52.8949	185.814	61.2404	106.106	12.2669	44.4835	44.5507	95.7994	0	0	1	0	0	0	0	1
chr6	31081365	31081564	Intergenic	-18371	Mir29b-1	0.916368	0.141175	0.559985	2.12399	0.00053959	0.0185781	1.63762	0.00680166	0.0904673	0.98558	0.0731714	0.201371	1.99663	0.000183222	0.00112865	12.7088	0	16.3049	15.5959	26.4474	54.4627	19.4856	35.3688	84.5052	81.2307	111.377	131.094	0	0	1	0	0	0	0	0
chr9	44517451	44517650	intron (NM_007551, intron 1 of 1)	8871	Cxcr5	1.37269	0.0102592	0.122222	2.12339	6.82643e-05	0.00421316	1.5595	0.00318905	0.0551753	-0.440793	0.387336	0.612304	0.961465	0.0520091	0.139221	17.9418	20.2963	48.6012	59.2645	61.0326	126.546	74.4628	48.86	50.4305	85.0988	69.3011	173.111	0	0	1	0	0	0	0	0
chr11	61644602	61644801	Intergenic	-8620	Grap	2.48454	1.81509e-05	0.00143428	2.12225	0.000353487	0.013816	1.27224	0.0299044	0.220958	1.45939	0.00319941	0.0173983	3.12118	5.24913e-11	1.77806e-09	4.48545	6.76544	30.4149	46.7878	35.6023	20.824	16.7019	14.2205	74.9643	92.8351	118.802	177.733	1	0	1	0	0	0	0	0
chr5	100466679	100466878	intron (NM_001346583, intron 4 of 12)	31795	Lin54	2.98734	2.34882e-08	7.54786e-06	2.1216	0.000105319	0.00571044	2.06012	0.000120621	0.00579544	1.51735	0.00159126	0.00984491	1.30849	0.00511853	0.0207174	12.7088	5.07408	97.2023	87.3372	32.5507	67.2775	32.7079	60.5281	167.647	129.582	94.0516	146.64	1	0	1	0	1	0	0	0
chr11	46128613	46128812	intron (NM_001311209, intron 1 of 11)	808	Adam19	1.48879	0.0108499	0.126931	2.11985	0.000283543	0.011859	1.50713	0.00900939	0.108245	-0.621582	0.259743	0.481159	0.235427	0.657682	0.795923	5.9806	15.2222	24.4574	38.9898	48.826	49.6572	27.1406	35.0042	25.8968	36.7472	34.6506	39.0761	0	0	1	0	0	0	0	0
chr8	124271045	124271244	intron (NM_139272, intron 1 of 15)	39750	Galnt2	1.27079	0.0220426	0.199193	2.11945	0.0001236	0.00642692	2.05331	0.000155392	0.00689711	0.611956	0.224813	0.439498	1.23024	0.011601	0.0414246	11.9612	11.8395	33.5505	29.6323	37.6367	83.296	45.2344	67.8206	77.6903	110.242	84.1514	189.498	0	0	1	0	1	0	0	0
chr2	31172115	31172314	intron (NM_178760, intron 5 of 17)	19898	Gpr107	2.35185	0.000435404	0.0152858	2.11858	0.00170797	0.0413571	1.71725	0.0101133	0.115852	-0.728285	0.261335	0.482513	0.452545	0.466242	0.647893	10.466	3.38272	45.7792	51.4666	42.7228	38.4443	38.2753	21.8776	5.45195	42.5494	42.0757	42.4374	1	0	1	0	0	0	0	0
chr3	59203915	59204114	intron (NM_177855, intron 15 of 43)	6868	P2ry13	2.22462	4.20807e-06	0.000477264	2.11549	1.423e-05	0.0013423	2.14086	8.48583e-06	0.000742348	0.149513	0.743902	0.871916	-0.09885	0.826147	0.90334	23.1748	20.2963	114.761	112.291	105.79	104.12	87.6851	125.432	171.736	59.956	79.2013	116.388	1	0	1	0	1	0	0	0
chr8	122285045	122285244	intron (NM_009569, intron 1 of 9)	3003	Zfpm1	2.02804	1.37643e-05	0.00115991	2.11491	6.55919e-06	0.00074392	1.78408	0.000121127	0.00580951	-0.287608	0.518463	0.722178	1.23294	0.00408032	0.0170551	21.6797	28.7531	105.668	115.41	69.1702	168.194	84.2056	100.272	94.0461	96.7032	163.353	281.936	1	0	1	0	1	0	0	0
chr3	108717960	108718159	intron (NM_029522, intron 1 of 14)	4240	Gpsm2	1.79152	0.0050519	0.0779045	2.11227	0.000999505	0.0287116	2.01597	0.001408	0.0324729	-0.629083	0.302194	0.528302	-1.17795	0.0510313	0.137236	7.47575	8.4568	29.1607	35.8706	31.5335	51.259	36.1875	39.7443	38.1636	11.6044	9.90016	18.9078	0	0	1	0	1	0	0	0
chr14	121107621	121107820	intron (NM_134082, intron 2 of 26)	72146	Farp1	2.18079	1.76936e-05	0.00140274	2.11088	3.97111e-05	0.00285269	2.86477	1.10423e-08	3.59634e-06	2.00991	1.05591e-05	0.000159902	1.12605	0.0107783	0.0389303	18.6894	5.07408	86.2279	46.7878	87.48	40.0461	101.603	122.15	324.391	232.088	282.155	227.313	1	0	1	0	1	0	1	0
chr11	34506508	34506707	intron (NM_033374, intron 23 of 51)	191785	Fam196b	1.79405	0.0035572	0.0619383	2.10859	0.00066865	0.0215299	1.75671	0.00387301	0.0628999	0.667106	0.225324	0.440052	1.44864	0.00605278	0.0238929	5.9806	6.76544	16.6185	38.9898	28.4819	38.4443	29.9243	21.513	47.7045	61.8901	56.9259	89.4968	0	0	1	0	0	0	0	0
chr11	75956820	75957019	Intergenic	-31028	Rph3al	1.06377	0.0883565	0.444703	2.10643	0.000691049	0.022045	1.7266	0.00512102	0.075372	-3.46446	4.76279e-07	1.23031e-05	-2.42146	0.000138125	0.000881722	17.9418	21.9877	27.9065	63.9433	51.8777	145.768	70.2873	76.5717	0	13.5384	9.90016	12.185	0	0	1	0	0	0	0	1
chr10	79692030	79692229	intron (NR_126325, intron 1 of 3)	-1697	Gzmm	0.946975	0.146059	0.568412	2.10539	0.00110184	0.0306646	0.962683	0.134806	0.493	-1.53021	0.0172778	0.0666206	0.500648	0.415354	0.602695	11.9612	10.1482	22.576	24.9535	27.4646	88.1015	19.4856	28.0763	10.9039	25.1428	22.2754	44.9585	0	0	1	0	0	0	0	0
chr6	37723383	37723582	Intergenic	-147329	Trim24	0.679121	0.285424	0.757066	2.10385	0.000787689	0.0242919	2.39955	0.000104742	0.00528668	0.625303	0.289602	0.51505	-0.322249	0.581672	0.739645	17.9418	5.07408	29.4743	10.9172	64.0842	62.472	57.7608	99.5432	162.195	38.6813	56.9259	66.3873	0	0	1	0	1	0	0	0
chr10	78092806	78093005	Intergenic	23537	Icosl	1.26482	0.0494458	0.322297	2.10337	0.00102401	0.0291895	1.75306	0.00534037	0.0774418	0.119431	0.837682	0.924054	0.188735	0.739837	0.849855	5.9806	6.76544	18.8134	15.5959	26.4474	40.0461	25.7488	24.7946	35.4377	36.7472	17.3253	37.3954	0	0	1	0	0	0	0	0
chr11	52046539	52046738	intron (NM_001166654, intron 13 of 13)	42417	Cdkl3	1.41279	0.0153663	0.157996	2.10088	0.00030498	0.0124793	1.29642	0.0249538	0.200104	0.406547	0.457314	0.673944	2.26487	2.35433e-05	0.00018363	13.4563	15.2222	32.2963	54.5858	36.6195	107.324	31.3161	46.3076	43.6156	150.857	195.528	222.691	0	0	1	0	0	0	0	0
chr12	33158293	33158492	intron (NM_028139, intron 2 of 3)	10706	Atxn7l1	1.95925	3.67529e-07	6.94225e-05	2.09939	6.11234e-08	1.70305e-05	1.97904	2.23671e-07	4.28957e-05	0.0210926	0.953574	0.980336	0.351244	0.319174	0.51075	35.8836	33.8272	163.363	121.648	141.392	177.805	147.534	144.392	177.188	145.055	153.453	216.389	1	0	1	0	1	0	0	0
chr17	6008103	6008302	intron (NM_001113352, intron 8 of 25)	622	Synj2	0.924764	0.127102	0.533439	2.099	0.000457284	0.0163881	1.80869	0.00220744	0.0434653	0.200268	0.719224	0.856847	1.02674	0.0572899	0.149918	15.6991	3.38272	26.6523	15.5959	36.6195	70.4812	33.4039	51.4124	66.7864	56.0879	59.401	119.329	0	0	1	0	1	0	0	0
chr3	137955574	137955773	intron (NM_011932, intron 3 of 8)	25876	Dapp1	1.94227	0.000289357	0.0112588	2.09889	9.59383e-05	0.00533381	2.42885	4.84794e-06	0.000482411	-0.293886	0.568684	0.758256	-1.35794	0.00820488	0.0309776	29.1554	10.1482	110.372	65.5029	97.6521	102.518	90.4688	163.353	113.128	46.4175	34.6506	55.883	1	0	1	0	1	0	0	0
chr5	22587545	22587744	Intergenic	37231	6030443J06Rik	2.48963	7.396e-05	0.00404766	2.09835	0.00105544	0.0298033	2.33533	0.000180578	0.00767569	1.83446	0.000922083	0.00629254	0.529918	0.327228	0.518885	7.47575	1.69136	37.6267	38.9898	32.5507	24.0277	32.7079	35.3688	164.921	56.0879	39.6007	59.2443	1	0	1	0	1	0	1	0
chr8	126867744	126867943	Intergenic	78078	Tomm20	2.25615	2.89995e-08	8.87978e-06	2.09668	3.01766e-07	6.58178e-05	2.00452	7.59481e-07	0.000117335	-0.202876	0.605178	0.784729	0.892201	0.0195259	0.0636971	58.3108	28.7531	222.938	238.618	147.495	265.906	157.972	226.069	181.277	174.066	319.28	407.147	1	0	1	0	1	0	0	0
chr18	23842309	23842508	intron (NM_153058, intron 2 of 6)	38438	Mapre2	1.83407	0.000426978	0.0150888	2.09643	6.55522e-05	0.00409294	1.66106	0.00126796	0.0303466	1.21064	0.00782269	0.0355424	0.963362	0.0313465	0.0933444	7.47575	13.5309	41.3894	37.4302	43.74	52.8609	33.4039	36.4627	128.121	102.505	54.4509	82.774	1	0	1	0	1	0	0	0
chr1	138290121	138290320	TTS (NM_177397)	16482	Atp6v1g3	2.3368	0.000201778	0.00863007	2.09541	0.00107725	0.0301892	2.30054	0.0002197	0.00877379	0.844278	0.130656	0.304777	0.765166	0.148882	0.303103	3.73787	6.76544	22.576	43.6686	27.4646	25.6295	27.8365	33.9103	64.0604	34.8132	49.5008	58.8242	1	0	1	0	1	0	0	0
chr5	64499284	64499483	Intergenic	22375	C030018K13Rik	1.32868	0.0256701	0.220247	2.0938	0.000421412	0.0155416	1.25813	0.0331624	0.234394	-0.667279	0.244994	0.464344	0.311578	0.581065	0.739265	15.6991	15.2222	38.5674	48.3474	37.6367	116.935	23.6611	57.2464	57.2455	34.8132	39.6007	61.3452	0	0	1	0	0	0	0	0
chr12	85661023	85661222	Intergenic	-25598	Batf	1.75733	0.00070861	0.0208017	2.09159	5.84563e-05	0.00372713	1.88175	0.000254969	0.00976173	-2.0481	0.000127083	0.00123751	-0.731041	0.138689	0.288075	16.4466	25.3704	72.745	77.9797	61.0326	132.953	82.1178	82.4057	27.2597	13.5384	32.1755	60.0847	1	0	1	0	1	0	0	1
chr5	53490893	53491092	Intergenic	-64787	Rbpj	1.85405	5.42744e-06	0.000566263	2.08963	3.21319e-07	6.94539e-05	2.21734	4.27872e-08	1.14945e-05	0.812976	0.0361064	0.118009	0.889977	0.0198755	0.0646362	38.1263	59.1976	166.185	201.188	227.855	205.036	208.078	266.178	535.654	237.89	415.807	481.098	1	0	1	0	1	0	0	0
chr10	12963355	12963554	intron (NM_029075, intron 1 of 2)	805	Stx11	2.23667	1.99003e-05	0.00153704	2.08929	7.87654e-05	0.00463321	2.10916	5.21598e-05	0.00313697	0.0913981	0.853682	0.932475	0.623197	0.194001	0.364927	26.9127	1.69136	79.9568	93.5756	63.067	92.907	80.0301	77.3009	73.6013	92.8351	116.327	131.094	1	0	1	0	1	0	0	0
chr9	75630766	75630965	intron (NM_027309, intron 1 of 2)	5133	Lysmd2	1.3605	0.0167208	0.166696	2.08896	0.000229471	0.0101014	2.20797	7.13817e-05	0.00395943	-0.935032	0.086214	0.22669	-0.873475	0.0922857	0.214896	12.7088	8.4568	29.7878	32.7515	44.7572	62.472	44.5385	70.7376	31.3487	21.2747	39.6007	24.37	0	0	1	0	1	0	0	0
chr12	69412036	69412235	Intergenic	39985	Arf6	1.18251	0.0493484	0.321977	2.08896	0.000476754	0.0169035	1.83365	0.00188258	0.0390167	0.416765	0.452547	0.670324	1.15282	0.0326062	0.0963746	7.47575	15.2222	30.4149	23.3939	26.4474	83.296	35.4916	53.2355	88.5942	58.0219	69.3011	136.556	0	0	1	0	1	0	0	0
chr10	75434569	75434768	intron (NM_133995, intron 6 of 9)	-14842	4933407G14Rik	2.37043	6.46458e-06	0.000639848	2.08789	9.48619e-05	0.00530942	2.97476	9.43179e-09	3.24073e-06	1.42766	0.00214776	0.0125547	0.605767	0.171378	0.33481	13.4563	3.38272	62.7112	51.4666	35.6023	59.2683	68.1995	109.753	133.573	131.516	111.377	162.607	1	0	1	0	1	0	0	0
chr5	72743221	72743420	intron (NM_001289495, intron 1 of 14)	-6718	Txk	0.898186	0.180289	0.626464	2.08505	0.00164882	0.0403844	1.75464	0.00732082	0.0946561	-1.23929	0.0568199	0.166333	-1.11795	0.0782738	0.190417	9.71847	6.76544	10.6609	26.5131	32.5507	54.4627	34.0998	32.8164	10.9039	23.2088	9.90016	16.8069	0	0	1	0	0	0	0	0
chr13	107095475	107095674	Intergenic	73004	3830408C21Rik	1.38573	0.0091052	0.113731	2.0836	8.49221e-05	0.00487892	1.85958	0.000386472	0.0132212	0.29222	0.557255	0.750502	-0.0402156	0.93509	0.965273	26.9127	6.76544	62.3976	38.9898	65.1014	108.925	66.8077	79.4887	137.662	75.4285	79.2013	64.7066	0	0	1	0	1	0	0	0
chr18	82568375	82568574	intron (NM_001025254, intron 2 of 5)	13966	Mbp	1.72894	0.00338789	0.0598041	2.08253	0.000440444	0.015949	0.961562	0.103354	0.432846	-0.909235	0.110604	0.270662	0.567039	0.303106	0.493959	11.2136	8.4568	40.7623	34.3111	35.6023	64.0738	26.4447	16.7728	23.1708	27.0769	24.7504	38.2357	0	0	1	0	0	0	0	0
chr18	62169317	62169516	Intergenic	10565	Adrb2	1.65762	0.00132065	0.0315606	2.08071	6.03691e-05	0.00381878	2.13037	2.54994e-05	0.00179959	2.90936	5.04945e-11	6.24087e-09	2.70791	2.33557e-10	6.72918e-09	11.2136	8.4568	31.042	43.6686	43.74	56.0646	43.1466	59.4342	569.729	241.758	299.48	426.055	1	0	1	0	1	0	1	0
chr7	141060832	141061031	promoter-TSS (NM_177897)	-343	B4galnt4	2.20299	1.04139e-05	0.000929575	2.08057	3.70442e-05	0.00270956	1.92024	0.000113068	0.00556742	-0.56925	0.236521	0.454056	-0.0311197	0.94653	0.971936	11.9612	27.0618	82.7788	107.612	83.4112	89.7033	95.3402	59.0696	38.1636	77.3626	84.1514	68.068	1	0	1	0	1	0	0	0
chr9	106430836	106431035	intron (NM_009082, intron 3 of 3)	1524	Rpl29	1.96718	0.0012241	0.029999	2.07901	0.000681249	0.02179	1.93613	0.0013541	0.0317309	-0.441509	0.44991	0.668019	-0.580666	0.312665	0.504217	12.7088	10.1482	59.8892	45.2282	36.6195	80.0923	35.4916	67.456	42.2526	40.6153	12.3752	49.1602	1	0	1	0	1	0	0	0
chr3	141778520	141778719	intron (NM_009472, intron 7 of 15)	152969	Bmpr1b	2.77636	1.20662e-05	0.00105175	2.07859	0.00122834	0.0328206	2.68967	2.07073e-05	0.00153012	-0.282987	0.643074	0.811187	-2.65168	2.5884e-05	0.000199786	5.23302	15.2222	75.2534	88.8968	57.9809	38.4443	77.9423	75.1132	66.7864	9.67032	12.3752	8.40345	1	0	1	0	1	0	0	0
chr17	46966975	46967174	exon (NM_001177374, exon 20 of 47)	43458	Ubr2	2.00266	4.93386e-06	0.000528015	2.07501	2.40775e-06	0.00034573	1.96738	6.61548e-06	0.000616383	-0.946342	0.0284076	0.0980316	-0.144915	0.730833	0.844144	68.7769	25.3704	194.718	226.141	160.719	283.527	199.031	210.025	114.491	108.308	133.652	229.414	1	0	1	0	1	0	0	0
chr2	181410799	181410998	3' UTR (NM_028125, exon 3 of 3)	13490	Zbtb46	2.53149	9.25952e-06	0.000851007	2.07459	0.000350082	0.0137694	1.56574	0.00622582	0.0853761	-0.483978	0.375077	0.601403	0.611017	0.240288	0.423285	8.22332	11.8395	47.0334	88.8968	42.7228	52.8609	44.5385	21.513	29.9857	36.7472	47.0258	54.6224	1	0	1	0	0	0	0	0
chr7	127278616	127278815	Intergenic	-4656	Sephs2	1.72929	0.00274437	0.0518356	2.07273	0.000344404	0.0136428	1.32512	0.0211758	0.181106	-1.41342	0.0138494	0.0562021	1.09033	0.0423173	0.118675	14.9515	13.5309	43.2707	65.5029	37.6367	102.518	33.4039	45.5784	12.2669	36.7472	74.2512	102.102	0	0	1	0	0	0	0	0
chr8	115618473	115618672	Intergenic	88322	Maf	1.88732	0.00315229	0.0570156	2.0726	0.0013507	0.0349659	2.38029	0.000147059	0.00664856	1.18837	0.0333485	0.110816	0.847983	0.110337	0.245248	4.48545	5.07408	15.3642	31.1919	26.4474	24.0277	38.9712	25.1593	79.0533	42.5494	59.401	60.0847	0	0	1	0	1	0	0	0
chr4	129571622	129571821	intron (NM_001162433, intron 1 of 12)	1920	Lck	1.85816	0.0010527	0.0270918	2.07144	0.000277467	0.0117057	1.81359	0.00128017	0.0305631	-1.49392	0.00846302	0.0379156	0.151341	0.77492	0.872199	22.4272	5.07408	55.813	67.0625	49.8433	94.5089	69.5914	48.86	16.3558	30.945	49.5008	79.8328	1	0	1	0	1	0	0	0
chr18	23828609	23828808	intron (NM_153058, intron 1 of 6)	24738	Mapre2	1.307	0.0427639	0.296463	2.07101	0.00128838	0.0337099	2.34846	0.000225371	0.00894535	-2.72966	6.32816e-05	0.000699812	-2.51513	9.01678e-05	0.000605667	9.71847	21.9877	35.1183	49.907	67.1358	83.296	79.3342	104.648	2.72597	15.4725	27.2254	4.6219	0	0	1	0	1	0	0	1
chr3	137871211	137871410	intron (NM_001033155, intron 1 of 7)	3635	Dnajb14	1.43963	0.00606406	0.0869164	2.06939	7.92211e-05	0.00464552	2.4199	2.26212e-06	0.000275263	-0.686278	0.165964	0.359359	-2.1024	2.40589e-05	0.000187258	10.466	15.2222	39.5081	32.7515	53.9121	62.472	68.1995	80.5826	35.4377	34.8132	17.3253	15.1262	0	0	1	0	1	0	0	0
chr17	35741963	35742162	Intergenic	-30388	4833427F10Rik	1.10426	0.0753426	0.406779	2.06681	0.000812167	0.0247941	1.24224	0.0429755	0.271923	-2.01206	0.0014412	0.00907613	-1.2202	0.0469561	0.128672	11.9612	16.9136	28.22	38.9898	44.7572	92.907	44.5385	29.1702	5.45195	25.1428	17.3253	12.6052	0	0	1	0	0	0	0	1
chr7	35729708	35729907	intron (NM_178704, intron 3 of 18)	24647	Dpy19l3	2.37234	2.15607e-06	0.000288686	2.06605	4.72594e-05	0.00320845	2.43171	9.81558e-07	0.000140999	-0.681078	0.157646	0.346883	-1.9967	3.45233e-05	0.00025844	15.6991	13.5309	84.3466	87.3372	67.1358	70.4812	84.9015	93.7092	58.6084	23.2088	22.2754	19.7481	1	0	1	0	1	0	0	0
chr3	123459542	123459741	intron (NM_008939, intron 1 of 10)	12728	Prss12	1.19339	0.0762412	0.409879	2.06322	0.00205916	0.0469961	2.62738	6.23234e-05	0.00358059	-1.78606	0.00857909	0.0383425	-2.20893	0.000571783	0.00308946	5.9806	10.1482	10.3473	32.7515	33.5679	44.8517	42.4507	75.4778	9.54091	9.67032	12.3752	10.0841	0	0	1	0	1	0	0	1
chr4	83321808	83322007	intron (NM_027238, intron 1 of 19)	2282	Ttc39b	1.89089	0.0018149	0.0394596	2.0612	0.000737694	0.0230898	2.27134	0.000147573	0.00665592	-0.450799	0.433884	0.654773	-1.10862	0.049223	0.133392	10.466	6.76544	43.5843	32.7515	41.7056	46.4535	52.1935	50.3185	47.7045	13.5384	17.3253	25.6305	1	0	1	0	1	0	0	0
chr15	96583308	96583507	intron (NM_001166458, intron 12 of 15)	58555	Slc38a1	2.43674	5.95773e-06	0.000602629	2.05979	0.000165013	0.00784412	1.99886	0.000193087	0.00806514	-0.68069	0.188999	0.392289	0.271755	0.574648	0.734636	9.71847	13.5309	74.9399	65.5029	36.6195	72.083	38.2753	63.4451	35.4377	29.011	54.4509	68.9083	1	0	1	0	1	0	0	0
chr12	113168299	113168498	Intergenic	11977	Tedc1	0.873077	0.11073	0.500068	2.05577	0.000156049	0.0075294	1.11062	0.0405177	0.262929	-2.70968	2.07092e-06	4.09949e-05	-2.13261	0.000164207	0.00102554	26.1651	40.5926	47.0334	81.0989	70.1874	233.869	83.5096	66.7267	14.9929	25.1428	12.3752	16.3867	0	0	1	0	0	0	0	1
chr11	102089188	102089387	promoter-TSS (NM_016695)	-772	Mpp2	2.56901	1.45706e-05	0.0012151	2.05527	0.000673783	0.0216518	1.35578	0.0230738	0.190969	-0.588124	0.300179	0.526211	1.52173	0.00382654	0.0161399	8.9709	5.07408	67.101	37.4302	33.5679	40.0461	23.6611	20.0545	20.4448	27.0769	47.0258	83.6144	1	0	1	0	0	0	0	0
chr3	104640926	104641125	intron (NM_009196, intron 1 of 4)	2361	Slc16a1	1.60387	0.00974907	0.118488	2.05471	0.000953702	0.0277934	1.67809	0.00625731	0.085686	-1.73409	0.00588132	0.028225	-1.73232	0.00479033	0.0195897	9.71847	10.1482	37.6267	29.6323	32.5507	64.0738	41.0589	30.9933	13.6299	11.6044	4.95008	11.7648	0	0	1	0	0	0	0	1
chr7	118491937	118492136	promoter-TSS (NM_001033380)	-61	Itpripl2	1.69955	0.00303166	0.0556482	2.05378	0.000360256	0.0140041	1.59267	0.00505344	0.0747576	-0.888006	0.109085	0.268024	-0.267439	0.61606	0.766153	11.9612	10.1482	51.4232	28.0727	41.7056	65.6757	43.8426	32.0872	31.3487	23.2088	24.7504	35.2945	0	0	1	0	0	0	0	0
chr16	94236894	94237093	intron (NM_139145, intron 4 of 9)	50863	Hlcs	2.59093	1.83499e-05	0.00144763	2.053	0.000911701	0.0268453	2.48239	3.53524e-05	0.00232557	0.607465	0.266424	0.488406	-0.0377592	0.942333	0.969186	5.23302	6.76544	35.7454	54.5858	30.5163	28.8332	40.363	41.2029	61.3344	30.945	29.7005	47.0593	1	0	1	0	1	0	0	0
chr4	139319809	139320008	Intergenic	9164	Akr7a5	1.50917	0.00618416	0.087854	2.05299	0.000195937	0.00896069	1.77299	0.00115341	0.0284561	-1.54119	0.00513277	0.0253728	-0.303196	0.560555	0.724066	20.9321	15.2222	39.8216	77.9797	45.7744	128.148	69.5914	70.0084	27.2597	27.0769	42.0757	66.8074	0	0	1	0	1	0	0	0
chr8	126585684	126585883	Intergenic	7653	Irf2bp2	1.73084	6.43517e-05	0.00367086	2.05273	2.30251e-06	0.000335304	1.55128	0.000312567	0.0114052	-0.10135	0.80562	0.90728	1.29905	0.00116055	0.00574579	32.1457	30.4445	105.982	116.97	84.4284	198.629	91.8606	103.189	119.943	141.187	217.804	276.474	1	0	1	0	0	0	0	0
chr9	118843787	118843986	intron (NM_001113514, intron 8 of 13)	-82650	Ctdspl	2.27628	0.000294266	0.0114113	2.0498	0.00141785	0.0361031	1.70016	0.00671337	0.0896394	1.15137	0.0361176	0.118029	1.64286	0.00173995	0.00817517	5.23302	3.38272	24.7709	32.7515	26.4474	20.824	20.1815	16.7728	72.2383	38.6813	54.4509	68.068	1	0	1	0	0	0	0	0
chr2	143839567	143839766	intron (NM_009751, intron 5 of 7)	23507	Bfsp1	1.22083	0.0325787	0.254597	2.04976	0.00031342	0.0127807	2.23106	6.8631e-05	0.00383332	0.20611	0.700381	0.846004	-0.452425	0.392106	0.58178	17.1942	11.8395	37.3132	38.9898	60.0153	81.6941	59.8486	100.637	129.484	32.8791	49.5008	64.2864	0	0	1	0	1	0	0	0
chr6	54807454	54807653	Intergenic	-9363	Znrf2	1.24512	0.0642389	0.373515	2.04897	0.00223477	0.0494211	1.69925	0.0102868	0.117138	-1.11041	0.0904731	0.23455	-0.742266	0.243633	0.427412	9.71847	6.76544	18.8134	28.0727	32.5507	52.8609	25.7488	38.6505	8.17792	29.011	9.90016	23.9498	0	0	1	0	0	0	0	0
chr6	115577510	115577709	intron (NM_199033, intron 11 of 11)	14967	Mkrn2os	3.43967	5.54717e-11	4.61008e-08	2.04819	0.000154038	0.00745989	2.04465	0.000107531	0.00537611	2.41638	1.91934e-07	5.80767e-06	2.62423	4.11545e-09	8.56903e-08	11.2136	5.07408	133.261	102.933	52.8949	32.0369	59.1527	28.0763	320.302	177.934	247.504	328.575	1	0	1	0	1	0	1	0
chr8	106935178	106935377	promoter-TSS (NM_009229)	-473	Sntb2	1.62336	0.000202547	0.0086553	2.04445	2.95601e-06	0.000408825	1.62276	0.000184464	0.00781332	-2.39163	1.7168e-07	5.29113e-06	-0.986163	0.0205882	0.066483	38.1263	43.9754	128.244	137.244	117.996	243.48	139.879	125.067	29.9857	32.8791	47.0258	78.1521	1	0	1	0	1	0	0	1
chr19	25056341	25056540	intron (NM_028785, intron 2 of 47)	56911	Dock8	2.26152	0.000288639	0.0112588	2.04108	0.00128671	0.0337099	2.27035	0.000238814	0.00932846	0.174691	0.761672	0.882487	0.82839	0.124793	0.267627	6.72817	5.07408	27.9065	46.7878	35.6023	25.6295	31.3161	41.5675	23.1708	48.3516	94.0516	46.219	1	0	1	0	1	0	0	0
chr5	34430852	34431051	intron (NM_001243123, intron 5 of 20)	61018	Fam193a	2.40536	6.3067e-05	0.00363196	2.03758	0.000893039	0.0265554	1.94144	0.00118641	0.0289849	1.53104	0.00408026	0.0211253	2.00291	8.81294e-05	0.000593464	8.9709	1.69136	39.8216	42.109	24.413	38.4443	41.7548	17.1375	77.6903	116.044	103.952	147.06	1	0	1	0	0	0	0	0
chr2	32715263	32715462	Intergenic	-2390	Mir3960	1.23135	0.0198019	0.18606	2.03641	0.000111509	0.00593916	0.894508	0.089176	0.401126	-1.08814	0.0363521	0.118627	1.12558	0.0266623	0.0821566	29.903	35.5186	86.2279	76.4201	64.0842	233.869	70.9832	56.5172	51.7935	81.2307	94.0516	192.859	0	0	1	0	0	0	0	0
chr9	66897964	66898163	intron (NM_173413, intron 1 of 7)	21642	Rab8b	1.9977	6.41709e-05	0.00366635	2.03415	5.61496e-05	0.00362373	2.4031	1.10565e-06	0.000156289	-0.146233	0.754776	0.878459	1.0144	0.0200781	0.0651194	17.9418	8.4568	66.7874	57.705	49.8433	80.0923	62.6322	104.648	55.8825	59.956	138.602	207.985	1	0	1	0	1	0	0	0
chr15	10723589	10723788	intron (NR_045063, intron 2 of 6)	8788	4930556M19Rik	1.81874	0.00129165	0.0311768	2.03108	0.000356907	0.0138993	1.67341	0.00283541	0.0511882	-0.319131	0.550805	0.745649	-0.465169	0.378481	0.568938	11.2136	11.8395	43.5843	48.3474	46.7916	60.8701	35.4916	46.3076	59.9714	23.2088	22.2754	33.6138	1	0	1	0	0	0	0	0
chr19	32274276	32274475	intron (NM_001168525, intron 2 of 9)	-63362	Sgms1	2.37149	2.9131e-05	0.00202039	2.03053	0.000454538	0.0163357	1.44847	0.0109334	0.121583	0.999747	0.0479629	0.146342	2.53709	1.46465e-07	2.06793e-06	7.47575	6.76544	37.3132	54.5858	23.3958	48.0554	22.2692	23.3361	76.3273	69.6263	99.0016	187.817	1	0	1	0	0	0	0	0
chr18	11931713	11931912	intron (NM_022021, intron 6 of 8)	-91374	Mir1901	1.4701	0.017139	0.169429	2.03024	0.00100217	0.0287368	2.28587	0.000156423	0.00693642	-0.436281	0.454508	0.67166	-1.12593	0.0484191	0.131742	10.466	6.76544	34.4912	20.2747	26.4474	60.8701	43.8426	59.4342	38.1636	23.2088	19.8003	23.9498	0	0	1	0	1	0	0	0
chr6	113661563	113661762	intron (NM_001113553, intron 2 of 11)	23195	Irak2	1.54891	0.00368903	0.0633483	2.03009	0.000145042	0.00719271	1.85138	0.000435123	0.0142292	-0.992878	0.0555931	0.163516	-0.162811	0.740395	0.850152	18.6894	10.1482	45.7792	51.4666	50.8605	88.1015	45.9303	74.0193	24.5338	42.5494	49.5008	56.7233	0	0	1	0	1	0	0	0
chr14	103666701	103666900	intron (NM_198014, intron 2 of 6)	16557	Slain1	2.40814	2.60794e-06	0.000331683	2.02492	0.000104188	0.00568749	2.51026	7.64455e-07	0.000117351	2.4444	7.45651e-08	2.61776e-06	1.50424	0.000605123	0.00324658	10.466	11.8395	56.4401	82.6584	44.7572	59.2683	57.0649	89.6983	429.341	177.934	195.528	241.179	1	0	1	0	1	0	1	0
chr15	28081315	28081514	Intergenic	-55566	Trio	1.31524	0.025253	0.21791	2.02482	0.000555663	0.0189476	2.99583	1.49879e-07	3.10063e-05	1.48062	0.00465746	0.0234754	0.3977	0.429605	0.615681	11.2136	5.07408	24.7709	24.9535	42.7228	41.648	66.8077	105.377	193.544	56.0879	103.952	126.472	0	0	1	0	1	0	0	0
chr2	9801556	9801755	Intergenic	76945	Gata3	0.520721	0.344291	0.807215	2.02264	0.000199561	0.00908334	1.56561	0.00376562	0.0616907	-2.40068	2.10284e-05	0.000282816	-1.61841	0.0028922	0.0127362	18.6894	42.284	35.7454	53.0262	67.1358	200.231	75.8546	112.67	19.0818	25.1428	32.1755	25.6305	0	0	1	0	0	0	0	1
chr12	101979433	101979632	intron (NM_016856, intron 1 of 14)	3558	Cpsf2	2.18818	0.000264485	0.0105974	2.01857	0.000897003	0.0266076	2.10311	0.000410633	0.0137073	0.160417	0.774512	0.890147	0.412375	0.442307	0.627062	8.22332	8.4568	45.7792	45.2282	28.4819	52.8609	32.012	52.8709	64.0604	25.1428	42.0757	71.0092	1	0	1	0	1	0	0	0
chr14	56816682	56816881	Intergenic	-5065	Zmym5	1.85282	0.000754096	0.0215977	2.01634	0.000266255	0.0113475	1.99974	0.000243875	0.00945568	-0.871099	0.104371	0.25951	-0.708647	0.172203	0.336	18.6894	11.8395	55.1858	73.3009	57.9809	86.4996	63.3281	78.0302	49.0675	25.1428	19.8003	58.404	1	0	1	0	1	0	0	0
chr10	39458811	39459010	intron (NM_001122893, intron 3 of 13)	89111	Fyn	1.67895	0.00911863	0.113781	2.01558	0.00184432	0.0436241	1.77195	0.00534199	0.077442	-0.204771	0.734954	0.866302	-0.722779	0.228886	0.409363	7.47575	6.76544	23.8303	31.1919	37.6367	32.0369	32.7079	25.5239	14.9929	46.4175	17.3253	16.3867	0	0	1	0	0	0	0	0
chr7	130827916	130828115	Intergenic	-37709	Plekha1	2.29493	1.93666e-05	0.00150809	2.01439	0.000218116	0.00970065	1.91121	0.000352575	0.0123599	-0.111229	0.826337	0.918593	-0.48817	0.326829	0.518589	17.1942	5.07408	53.3045	85.7776	53.9121	57.6664	52.8894	50.3185	61.3344	40.6153	32.1755	38.6559	1	0	1	0	1	0	0	0
chr19	29185619	29185818	Intergenic	50439	Mir101b	1.89368	0.00131654	0.0315251	2.01263	0.000715867	0.0225531	1.62081	0.00563146	0.0799316	0.383696	0.480679	0.69267	2.10075	5.11933e-05	0.000367336	8.9709	8.4568	26.3387	53.0262	24.413	60.8701	32.012	30.6287	35.4377	77.3626	121.277	171.43	1	0	1	0	0	0	0	0
chr3	32409164	32409363	Intergenic	-26888	Pik3ca	1.7242	0.00212219	0.0437062	2.01201	0.000380297	0.0145369	2.07474	0.000165623	0.00722475	2.21445	4.64409e-06	8.13026e-05	1.70625	0.000250569	0.00149055	5.9806	10.1482	21.3218	40.5494	41.7056	30.4351	36.8834	39.3797	242.612	121.846	111.377	150.842	1	0	1	0	1	0	1	0
chr3	84715195	84715394	Intergenic	49102	Tmem154	1.58999	0.00132843	0.0316995	2.0117	4.98232e-05	0.00331252	1.86169	0.000151914	0.00679275	0.655694	0.165628	0.358861	1.04867	0.0245344	0.0766716	15.6991	49.0494	88.4228	113.85	86.4628	189.018	104.387	140.381	278.049	162.461	212.854	310.928	1	0	1	0	1	0	0	0
chr8	117282713	117282912	intron (NM_001163262, intron 1 of 20)	25793	Cmip	1.53453	0.00118103	0.029306	2.01146	2.16929e-05	0.00183768	1.35043	0.00404376	0.0648212	0.747625	0.0911835	0.23572	1.11192	0.011249	0.0403202	20.9321	30.4445	67.4145	90.4564	75.2735	147.37	69.5914	67.0914	257.605	119.912	146.027	159.245	0	0	1	0	0	0	0	0
chr9	117927107	117927306	Intergenic	-113316	Azi2	1.95569	5.43562e-05	0.00327101	2.01137	3.68045e-05	0.00269612	1.96076	4.64761e-05	0.00285018	0.438857	0.339914	0.566992	0.603737	0.180872	0.347635	19.4369	32.1358	118.211	93.5756	91.5488	131.351	99.5157	114.128	212.626	90.901	108.902	216.809	1	0	1	0	1	0	0	0
chr17	27814720	27814919	intron (NM_001033279, intron 1 of 4)	5723	D17Wsu92e	1.09179	0.0525686	0.334025	2.01033	0.000331885	0.0133535	1.77795	0.00133439	0.0314523	-1.89846	0.000891192	0.00613237	-0.324236	0.540873	0.708475	20.9321	15.2222	35.7454	49.907	40.6884	128.148	63.3281	76.5717	13.6299	27.0769	47.0258	61.7654	0	0	1	0	1	0	0	1
chr11	54214534	54214733	Intergenic	-1345	4933405E24Rik	2.12224	0.000127182	0.00610602	2.00674	0.000311349	0.0127076	2.66942	1.25568e-06	0.000173428	0.378226	0.480406	0.692449	0.188816	0.720089	0.836904	23.1748	28.7531	116.956	140.363	205.476	27.2314	164.236	220.235	179.914	131.516	205.428	236.557	1	0	1	0	1	0	0	0
chr4	11135427	11135626	Intergenic	1429	Mir684-2	2.08351	0.000309432	0.0118941	2.00609	0.000644756	0.0210723	2.20644	0.000107967	0.00537611	2.11365	2.16202e-05	0.000289322	1.83619	0.000107287	0.000706481	5.9806	6.76544	30.1014	35.8706	36.6195	24.0277	25.0529	45.5784	196.27	90.901	131.177	141.178	1	0	1	0	1	0	1	0
chr5	105244806	105245005	Intergenic	-5372	Gbp10	0.696085	0.288562	0.760298	2.00479	0.00185161	0.0437033	2.03555	0.00122824	0.0297356	-0.712776	0.244952	0.464309	-0.0854784	0.881091	0.935248	8.9709	3.38272	11.6016	12.4767	32.5507	32.0369	27.1406	38.2858	14.9929	23.2088	29.7005	31.9331	0	0	1	0	1	0	0	0
chr11	4804074	4804273	intron (NM_001252251, intron 6 of 16)	28962	Nf2	2.09441	2.07101e-05	0.00157954	2.00444	5.6158e-05	0.00362373	2.10529	1.58826e-05	0.00123474	-0.0683969	0.8826	0.946412	0.473351	0.283751	0.47331	20.1845	10.1482	60.8299	93.5756	53.9121	89.7033	70.2873	82.4057	69.5123	65.7582	84.1514	127.732	1	0	1	0	1	0	0	0
chr17	64622332	64622531	intron (NM_008549, intron 1 of 21)	20782	Man2a1	0.989409	0.109819	0.497723	2.00262	0.00112724	0.0311392	1.52336	0.0125588	0.132261	0.106349	0.856848	0.933864	0.0581137	0.921152	0.957331	20.9321	10.1482	53.9316	12.4767	75.2735	75.2867	46.6262	57.9757	126.758	34.8132	51.9759	57.1435	0	0	1	0	0	0	0	0
chr13	63245926	63246125	intron (NR_110520, intron 2 of 5)	5996	2010111I01Rik	1.83459	0.000956796	0.0254102	2.00259	0.000357084	0.0138993	1.23867	0.0253831	0.201934	0.85804	0.0857573	0.225859	1.76441	0.00029004	0.00169214	7.47575	11.8395	36.686	38.9898	50.8605	33.6387	15.3101	32.4518	89.9571	69.6263	81.6763	94.5388	1	0	1	0	0	0	0	0
chr19	56679323	56679522	Intergenic	-42950	Adrb1	1.62707	0.00947063	0.116431	1.99875	0.00148204	0.0373625	1.3461	0.0308247	0.224511	-1.46848	0.0193498	0.0726855	-0.914341	0.135132	0.282857	8.22332	15.2222	26.6523	54.5858	36.6195	68.8793	31.3161	32.4518	14.9929	19.3406	7.42512	21.0086	0	0	1	0	0	0	0	0
chr10	19011987	19012186	promoter-TSS (NM_001166402)	-123	Tnfaip3	1.32982	0.00518113	0.0790169	1.9962	2.6288e-05	0.00209334	1.5994	0.000636921	0.0185127	0.490947	0.261773	0.482986	1.73705	3.96154e-05	0.000292605	28.4078	6.76544	46.0927	59.2645	70.1874	99.3144	59.8486	66.3621	107.676	133.45	232.654	211.767	0	0	1	0	1	0	0	0
chr9	69458309	69458508	intron (NM_007585, intron 1 of 12)	1464	Mir3109	1.92344	0.000622057	0.0190387	1.99475	0.000466082	0.0166292	1.89971	0.000624426	0.0183081	1.15627	0.0195006	0.0731321	2.21762	2.0576e-06	2.12332e-05	8.9709	5.07408	37.3132	28.0727	26.4474	44.8517	20.8774	43.7552	73.6013	90.901	158.403	171.01	1	0	1	0	1	0	0	0
chr9	46154523	46154722	intron (NM_027498, intron 3 of 24)	-74008	Apoa1	1.03649	0.0696049	0.389807	1.99432	0.000433264	0.0157725	1.82657	0.00104672	0.0267235	-1.7886	0.00202147	0.0119206	-0.127206	0.805793	0.891005	13.4563	10.1482	25.7116	28.0727	46.7916	62.472	37.5793	57.6111	9.54091	19.3406	34.6506	50.4207	0	0	1	0	1	0	0	1
chr10	39418465	39418664	intron (NM_001122892, intron 2 of 12)	48765	Fyn	1.75234	0.00554573	0.0823268	1.99304	0.00170543	0.0413507	2.17642	0.000486006	0.0152815	-0.303652	0.61413	0.791273	-0.386546	0.506983	0.682132	4.48545	15.2222	21.3218	53.0262	36.6195	49.6572	58.4567	40.109	24.5338	44.4835	27.2254	44.1181	0	0	1	0	1	0	0	0
chr9	15516106	15516305	intron (NM_133214, intron 1 of 2)	10710	Smco4	1.47101	0.0117798	0.133715	1.99216	0.000655691	0.0212648	1.55121	0.00720412	0.0938268	1.36627	0.0105988	0.0453798	0.999164	0.059597	0.154604	9.71847	13.5309	46.7198	21.8343	38.654	67.2775	43.8426	32.0872	192.181	94.7691	44.5507	108.825	0	0	1	0	0	0	0	0
chr10	68036391	68036590	intron (NM_001081346, intron 11 of 12)	56892	Rtkn2	1.99301	0.000100878	0.00516191	1.99206	0.00012668	0.00655384	2.69752	8.32946e-08	2.00748e-05	0.432279	0.352505	0.579597	-0.366816	0.406963	0.595139	13.4563	6.76544	51.1096	45.2282	58.9981	36.8424	74.4628	86.7812	59.9714	73.4944	61.876	62.1855	1	0	1	0	1	0	0	0
chr12	85624776	85624975	intron (NM_001205052, intron 2 of 3)	24857	Jdp2	1.96343	2.44465e-06	0.000314231	1.99019	2.31108e-06	0.000335538	1.55592	0.000173998	0.00748842	0.79937	0.0348578	0.114683	2.18023	2.12408e-09	4.7821e-08	23.9224	18.605	84.033	99.814	75.2735	112.129	75.8546	60.8927	154.018	176	277.205	365.13	1	0	1	0	0	0	0	0
chr19	34306839	34307038	intron (NM_007987, intron 1 of 8)	16279	Fas	1.24803	0.00609646	0.0871476	1.9896	1.16542e-05	0.00117032	1.47147	0.00108183	0.027259	0.167469	0.698754	0.844907	0.989968	0.0200424	0.0650212	30.6506	38.9013	87.4821	84.218	85.4456	211.444	110.65	91.886	177.188	154.725	153.453	255.045	0	0	1	0	0	0	0	0
chr8	46142574	46142773	Intergenic	-18527	Snx25	1.89052	0.000717299	0.020943	1.98954	0.000420191	0.0155203	2.48743	6.21363e-06	0.00058498	0.361706	0.48415	0.695465	-0.457809	0.361452	0.552101	15.6991	3.38272	48.9147	40.5494	41.7056	56.0646	62.6322	76.9363	83.1422	42.5494	44.5507	54.2023	1	0	1	0	1	0	0	0
chr15	100414143	100414342	intron (NM_008732, intron 1 of 16)	8813	Slc11a2	2.13533	0.000114212	0.00566381	1.98763	0.000370799	0.0142872	1.6459	0.00286458	0.0515218	-0.371925	0.486176	0.697003	0.644098	0.212386	0.388727	11.2136	21.9877	49.2283	113.85	52.8949	91.3052	55.6731	55.4233	32.7117	77.3626	71.7762	104.623	1	0	1	0	0	0	0	0
chr1	54585487	54585686	Intergenic	-27902	Pgap1	1.64626	1.29892e-05	0.00111012	1.98592	1.55272e-07	3.70516e-05	2.09248	2.14203e-08	6.53482e-06	-1.03812	0.00514718	0.0254283	-0.713893	0.0460163	0.126726	47.0972	52.4322	166.498	155.959	157.667	256.295	213.645	230.08	106.313	88.967	113.852	149.161	1	0	1	0	1	0	0	0
chr16	36602708	36602907	Intergenic	-40673	Casr	2.43461	9.04154e-06	0.000834905	1.97792	0.000433573	0.0157725	2.04	0.000185137	0.00781634	3.06601	8.134e-11	9.27141e-09	2.84223	2.9866e-10	8.32621e-09	5.23302	10.1482	60.5163	31.1919	39.6712	27.2314	47.3221	24.7946	399.355	230.154	247.504	311.348	1	0	1	0	1	0	1	0
chr11	4268571	4268770	intron (NM_008501, intron 3 of 3)	1874	Lif	1.67391	0.00051818	0.0169683	1.97755	4.57595e-05	0.00315164	1.75913	0.000220877	0.00880622	0.695066	0.113852	0.276261	1.65942	8.44348e-05	0.000571226	20.9321	8.4568	50.4825	60.8241	47.8088	91.3052	64.72	52.8709	107.676	119.912	175.728	210.927	1	0	1	0	1	0	0	0
chr9	114026616	114026815	promoter-TSS (NM_178624)	36	Fbxl2	1.90768	0.00061026	0.018772	1.97701	0.00042288	0.0155719	1.48969	0.0072081	0.0938533	-0.620643	0.249171	0.469308	-0.252123	0.63258	0.778682	18.6894	8.4568	57.3807	63.9433	43.74	84.8978	29.2284	58.705	32.7117	48.3516	37.1256	36.555	1	0	1	0	0	0	0	0
chr18	65381920	65382119	intron (NM_001037294, intron 1 of 12)	11869	Alpk2	1.69199	3.58464e-06	0.000423497	1.97655	6.62291e-08	1.8036e-05	1.93194	9.9994e-08	2.31072e-05	-0.162373	0.646333	0.813307	0.389007	0.262496	0.449368	70.272	74.4198	248.336	237.058	222.769	374.832	267.927	308.11	317.576	210.813	329.18	427.316	1	0	1	0	1	0	0	0
chr13	43250697	43250896	intron (NM_001033399, intron 1 of 1)	53376	Gfod1	1.23542	0.0170416	0.168847	1.97629	0.00013113	0.00666719	1.43799	0.00515041	0.0756416	-1.70238	0.00106268	0.00706139	-0.291814	0.561583	0.724749	29.903	45.6667	73.0585	115.41	86.4628	237.073	127.352	89.3336	28.6227	63.8241	64.3511	106.724	0	0	1	0	0	0	0	1
chr12	69385955	69386154	Intergenic	13904	Arf6	1.41126	0.00230827	0.0462056	1.97609	1.97137e-05	0.00170294	1.76085	0.000119777	0.00576993	-0.0273082	0.950624	0.979042	0.569261	0.186258	0.354833	36.6312	20.2963	75.567	92.016	87.48	164.99	80.0301	133.453	129.484	116.044	126.227	193.279	0	0	1	0	1	0	0	0
chr15	36214830	36215029	intron (NM_012031, intron 12 of 18)	25235	Mir8097	1.2971	0.00335675	0.0594423	1.97551	7.60646e-06	0.000835186	2.04898	2.38908e-06	0.000287896	-1.04693	0.0152371	0.060519	-0.250337	0.538633	0.706443	26.9127	28.7531	70.2365	73.3009	92.566	142.564	100.907	144.392	51.7935	58.0219	79.2013	121.85	0	0	1	0	1	0	0	0
chr5	112297351	112297550	intron (NM_001326590, intron 1 of 5)	20759	Tpst2	1.68987	5.69779e-06	0.000580645	1.97519	1.22391e-07	3.01392e-05	1.5099	4.62012e-05	0.00284418	-0.37185	0.303386	0.529503	0.621307	0.0792387	0.19222	65.7866	59.1976	219.176	202.747	195.304	325.175	186.505	185.231	190.818	206.945	220.279	351.684	1	0	1	0	0	0	0	0
chr15	64284606	64284805	intron (NM_010026, intron 3 of 30)	27968	Asap1	1.88185	0.00155828	0.0354285	1.96915	0.00108328	0.0303229	1.3271	0.0252181	0.201119	0.404536	0.453995	0.671299	1.42386	0.0059961	0.0237001	5.9806	8.4568	28.22	32.7515	22.3786	43.2498	21.5733	18.596	40.8896	46.4175	49.5008	63.4461	1	0	1	0	0	0	0	0
chr1	153085204	153085403	intron (NM_175460, intron 4 of 10)	101144	Lamc2	1.5427	0.00237136	0.0470388	1.96615	0.00010776	0.00580365	1.69238	0.000828662	0.0225635	-1.60225	0.00162317	0.00999217	-1.1126	0.0272442	0.0835171	108.398	64.2717	291.921	252.654	257.354	488.563	292.284	316.132	175.825	50.2857	64.3511	196.641	0	0	1	0	1	0	0	1
chr17	7931609	7931808	intron (NM_145968, intron 8 of 9)	5708	Tagap	1.55949	0.00191553	0.0409239	1.96462	9.86748e-05	0.00546076	1.83122	0.00021631	0.00870941	-0.964292	0.0484675	0.147424	-0.785667	0.0923873	0.215091	16.4466	13.5309	40.1352	59.2645	62.0498	68.8793	58.4567	59.7988	29.9857	34.8132	29.7005	35.7147	0	0	1	0	1	0	0	0
chr1	130996505	130996704	Intergenic	-23241	Il10	3.03761	4.83418e-08	1.34692e-05	1.96389	0.000736966	0.023082	2.58178	3.2255e-06	0.000360732	2.25995	1.19935e-06	2.62063e-05	2.51249	2.49397e-09	5.50684e-08	3.73787	6.76544	37.9403	70.1817	23.3958	24.0277	38.9712	36.0981	124.032	121.846	193.053	262.188	1	0	1	0	1	0	1	0
chr7	35119040	35119239	promoter-TSS (NM_001287514)	-154	Cebpa	2.34935	4.05593e-07	7.46199e-05	1.96325	3.01353e-05	0.00233159	1.73132	0.000184122	0.00780568	1.10954	0.00961144	0.0419456	1.38432	0.000933996	0.00474377	14.9515	25.3704	132.948	82.6584	95.6177	68.8793	73.7668	66.3621	241.249	125.714	175.728	202.943	1	0	1	0	1	0	0	0
chr9	114447821	114448020	intron (NR_108101, intron 9 of 14)	46825	Tmppe	1.90339	0.0005348	0.0172431	1.96195	0.000414614	0.015362	1.91996	0.000415401	0.013807	0.959454	0.0547913	0.161839	1.35997	0.00466938	0.0191536	10.466	10.1482	55.1858	31.1919	47.8088	44.8517	45.9303	44.1199	133.573	52.2197	99.0016	141.598	1	0	1	0	1	0	0	0
chr4	86713675	86713874	Intergenic	-34781	Dennd4c	1.15164	0.0670339	0.382387	1.96193	0.00174327	0.0419725	1.58307	0.010833	0.12086	-0.113062	0.851271	0.931387	-0.425148	0.480158	0.659483	13.4563	16.9136	28.5336	46.7878	41.7056	96.1107	48.018	54.3294	85.8682	38.6813	9.90016	58.404	0	0	1	0	0	0	0	0
chr12	40248893	40249092	Intergenic	25628	Gm7008	1.64922	9.49421e-05	0.00492278	1.96176	3.67137e-06	0.000476563	1.88946	6.4111e-06	0.000600054	-1.65475	0.000109108	0.00109313	-1.47803	0.000344119	0.00196648	35.8836	42.284	104.414	154.4	155.633	164.99	132.224	171.01	64.0604	30.945	54.4509	50.8409	1	0	1	0	1	0	0	1
chr5	151252264	151252463	Intergenic	-62170	Stard13	2.72997	3.50943e-06	0.000416654	1.96131	0.00124031	0.0330671	2.28853	9.4544e-05	0.00492139	2.77837	4.06232e-08	1.57279e-06	1.88905	8.69014e-05	0.000586505	2.24272	10.1482	34.4912	59.2645	24.413	27.2314	35.4916	30.6287	269.871	123.78	133.652	129.413	1	0	1	0	1	0	1	0
chr8	71286184	71286383	intron (NM_015742, intron 1 of 39)	13569	Myo9b	1.45959	0.0140131	0.149372	1.95793	0.00099075	0.0285623	1.37837	0.0193525	0.172198	-2.41604	0.000127158	0.00123798	-0.855489	0.139016	0.288536	11.2136	20.2963	34.8047	59.2645	37.6367	97.7126	54.2813	32.8164	10.9039	9.67032	24.7504	21.4288	0	0	1	0	0	0	0	1
chr1	82836438	82836637	Intergenic	-2923	Agfg1	2.04375	4.06299e-05	0.00258369	1.95789	0.000113252	0.00600545	2.471	4.47274e-07	7.75521e-05	1.15794	0.00810501	0.0366146	0.55727	0.178073	0.343834	11.2136	8.4568	44.2114	51.4666	42.7228	46.4535	61.2404	67.456	121.306	83.1648	86.6264	104.203	1	0	1	0	1	0	0	0
chr2	73459900	73460099	intron (NM_153138, intron 1 of 7)	-6110	Wipf1	2.21432	0.000152286	0.00697397	1.95695	0.00114766	0.0314396	2.66416	3.38491e-06	0.000374219	2.0116	3.62921e-05	0.000444336	1.70158	0.000124172	0.000803076	5.23302	3.38272	27.2794	26.5131	23.3958	20.824	27.8365	46.3076	91.3201	102.505	116.327	139.077	1	0	1	0	1	0	1	0
chr9	72097176	72097375	intron (NM_001253862, intron 3 of 19)	13926	Tcf12	1.19861	0.0493742	0.321977	1.95658	0.00128911	0.0337099	1.71494	0.00427854	0.0673104	-1.77502	0.00413438	0.0213482	-1.49385	0.0120028	0.0425944	11.2136	15.2222	26.0251	40.5494	37.6367	78.4904	54.2813	41.5675	10.9039	19.3406	7.42512	20.1683	0	0	1	0	0	0	0	1
chr6	48802002	48802201	Intergenic	-31250	Gimap3	0.429379	0.372375	0.826301	1.95522	3.55541e-05	0.00262849	1.58795	0.000696318	0.0198251	-1.18915	0.0109168	0.046481	0.15842	0.722493	0.838585	28.4078	32.1358	34.8047	49.907	73.2391	181.009	86.9892	105.377	51.7935	54.1538	99.0016	115.968	0	0	1	0	1	0	0	0
chr6	35462557	35462756	Intergenic	77232	Mtpn	0.534131	0.346468	0.808196	1.95472	0.000443129	0.0159998	2.49725	4.57524e-06	0.00046973	-2.02921	0.00046761	0.00362026	-4.22084	8.58789e-12	3.54412e-10	12.7088	16.9136	17.2456	28.0727	72.2219	51.259	75.8546	107.2	13.6299	13.5384	2.47504	3.78155	0	0	1	0	1	0	0	1
chr7	19321539	19321738	Intergenic	-11593	Fosb	2.16622	2.77623e-05	0.00195929	1.95316	0.000199913	0.00909075	1.66045	0.00126455	0.0302952	1.05932	0.0238062	0.0853357	2.17412	1.32347e-06	1.44167e-05	17.1942	3.38272	55.813	63.9433	44.7572	57.6664	37.5793	44.4845	89.9571	131.516	148.502	245.801	1	0	1	0	1	0	0	0
chr11	78766514	78766713	Intergenic	-14884	Fam58b	0.823457	0.182857	0.630686	1.95239	0.00147063	0.0371332	1.50247	0.0137549	0.140083	-3.03669	4.94466e-06	8.5458e-05	-1.83144	0.00308116	0.0134381	13.4563	30.4445	28.5336	53.0262	51.8777	136.157	82.8137	50.3185	2.72597	15.4725	12.3752	18.9078	0	0	1	0	0	0	0	1
chr10	107932513	107932712	Intergenic	-14033	Gm29685	1.29918	0.0150288	0.155388	1.95019	0.000256894	0.0110759	2.3063	1.20007e-05	0.000993914	0.29763	0.559295	0.752087	-0.659554	0.191855	0.362133	22.4272	25.3704	74.9399	49.907	106.807	97.7126	89.0769	175.75	200.359	52.2197	81.6763	81.9337	0	0	1	0	1	0	0	0
chr6	140613917	140614116	Intergenic	-8647	Aebp2	2.13485	0.00032276	0.0122598	1.94947	0.00115338	0.0314808	1.95339	0.000937157	0.0246174	1.46063	0.00823222	0.0370885	1.24536	0.0216121	0.069219	11.9612	10.1482	73.3721	42.109	56.9637	44.8517	29.9243	71.8315	241.249	59.956	133.652	126.052	1	0	1	0	1	0	0	0
chr18	53801536	53801735	Intergenic	-57088	Cep120	1.15859	0.0501142	0.324478	1.94894	0.00094041	0.0275284	2.15709	0.000163645	0.00717744	1.98066	0.000100094	0.00101817	1.26548	0.00989194	0.0362622	5.23302	10.1482	16.932	20.2747	36.6195	28.8332	45.2344	32.0872	194.907	85.0988	76.7263	114.707	0	0	1	0	1	0	1	0
chr6	37370723	37370922	intron (NM_178661, intron 2 of 11)	-70846	Dgki	1.39642	0.0061647	0.0877383	1.94457	0.000140471	0.00703843	2.39063	1.48341e-06	0.00019807	1.59226	0.000410967	0.00325492	0.976732	0.0243224	0.076134	12.7088	11.8395	36.9996	34.3111	46.7916	60.8701	68.1995	79.4887	238.523	98.6373	143.552	155.884	0	0	1	0	1	0	1	0
chr18	67248878	67249077	Intergenic	-3147	Mppe1	1.55332	0.000193085	0.0083292	1.94191	3.24163e-06	0.000440656	1.93322	2.9696e-06	0.000341625	-0.810253	0.0480038	0.146402	-0.871669	0.0311635	0.0929025	45.6021	76.1112	189.388	177.794	228.872	257.897	211.558	270.918	189.455	79.2966	111.377	143.699	0	0	1	0	1	0	0	0
chr12	79447165	79447364	intron (NM_009014, intron 7 of 10)	149913	Rad51b	1.95189	0.000536752	0.0172713	1.9419	0.000637382	0.0208914	1.92662	0.000576892	0.0172931	-1.99109	0.000731273	0.00521587	-1.18902	0.0281799	0.0858019	18.6894	8.4568	41.7029	85.7776	44.7572	80.0923	54.9772	66.7267	13.6299	13.5384	29.7005	22.2691	1	0	1	0	1	0	0	1
chr2	135891240	135891439	intron (NM_013829, intron 3 of 36)	149509	Plcb4	2.88752	1.31565e-08	4.76819e-06	1.94157	0.000166996	0.00790723	2.17249	1.8808e-05	0.00141433	1.96689	3.77205e-05	0.000458639	0.614822	0.192867	0.363468	20.1845	18.605	165.871	169.996	127.151	38.4443	103.691	95.5323	501.579	203.077	173.253	140.758	1	0	1	0	1	0	1	0
chr2	126920420	126920619	intron (NM_023220, intron 6 of 14)	12716	Sppl2a	1.17269	0.0648621	0.375689	1.93824	0.00221005	0.0491143	1.34548	0.0323028	0.230778	-0.992233	0.110943	0.271249	-0.144436	0.812095	0.894818	15.6991	11.8395	21.0082	51.4666	39.6712	86.4996	44.5385	35.3688	13.6299	46.4175	22.2754	46.219	0	0	1	0	0	0	0	0
chr10	122728316	122728515	intron (NM_176919, intron 1 of 8)	49100	Mir8104	0.963312	0.112912	0.504872	1.93798	0.00130907	0.0341079	1.62229	0.0063836	0.0865305	0.733093	0.190403	0.394165	0.702734	0.202618	0.37597	8.22332	15.2222	11.288	40.5494	48.826	51.259	41.0589	37.9212	111.765	59.956	49.5008	81.0933	0	0	1	0	0	0	0	0
chr13	38503553	38503752	intron (NM_001289598, intron 8 of 9)	24262	Txndc5	1.78349	0.00211582	0.0436028	1.92885	0.000946876	0.0276614	2.03168	0.000411145	0.0137149	-1.57826	0.00725388	0.0334531	-1.77345	0.00184535	0.00861081	8.9709	23.679	47.347	73.3009	42.7228	91.3052	81.4219	61.622	19.0818	21.2747	9.90016	24.37	1	0	1	0	1	0	0	0
chr3	84678892	84679091	intron (NM_177260, intron 1 of 6)	12799	Tmem154	1.87584	5.87975e-05	0.0034594	1.92879	4.09233e-05	0.00291371	2.00878	1.43589e-05	0.00115355	0.443488	0.315139	0.542028	0.738357	0.0857543	0.203653	29.903	18.605	84.3466	116.97	65.1014	144.166	86.2933	132.36	164.921	119.912	168.303	204.204	1	0	1	0	1	0	0	0
chr7	4647402	4647601	intron (NM_172894, intron 1 of 23)	11449	Ppp6r1	1.23446	0.00798376	0.104546	1.92507	3.39841e-05	0.00254364	1.29341	0.00504173	0.074638	-1.34639	0.00360696	0.0191163	-0.731471	0.106958	0.239599	38.1263	32.1358	64.5925	113.85	98.6693	192.221	96.0361	86.7812	43.6156	65.7582	47.0258	58.404	0	0	1	0	0	0	0	0
chr14	70276789	70276988	intron (NM_001304991, intron 1 of 14)	12609	Ppp3cc	0.243857	0.659979	0.945632	1.92432	0.000386752	0.0146328	1.36562	0.0110724	0.122573	-2.85343	1.74943e-06	3.56273e-05	-1.11834	0.0360051	0.104234	24.67	16.9136	26.0251	24.9535	60.0153	118.537	54.9772	61.9866	13.6299	5.80219	34.6506	19.7481	0	0	1	0	0	0	0	1
chr7	143010016	143010215	intron (NM_001128081, intron 2 of 6)	4456	Tspan32	1.2034	0.00639598	0.0897784	1.92322	1.25467e-05	0.00122424	1.48052	0.000700014	0.0199068	-0.80575	0.0614873	0.176607	0.589288	0.157833	0.316361	53.8254	27.0618	95.6346	106.052	112.91	227.462	96.732	148.039	94.0461	94.7691	200.478	176.893	0	0	1	0	0	0	0	0
chr14	121830176	121830375	Intergenic	-32541	Dock9	1.63075	0.00899327	0.112801	1.92257	0.00216753	0.0485273	2.15123	0.000480547	0.0151296	0.0410927	0.944726	0.976219	-0.000553071	0.999232	0.999755	14.2039	5.07408	34.1776	40.5494	32.5507	60.8701	46.6262	62.7159	76.3273	17.4066	44.5507	63.4461	0	0	1	0	1	0	0	0
chr6	50416825	50417024	intron (NM_001347213, intron 2 of 23)	-34087	Osbpl3	1.20862	0.00756266	0.100617	1.91892	2.138e-05	0.00182357	1.7615	8.16688e-05	0.00440829	-1.55963	0.000587883	0.00435628	-0.720171	0.0977529	0.22429	28.4078	54.1235	76.5077	120.089	109.859	216.249	153.101	136.006	57.2455	46.4175	89.1015	83.1942	0	0	1	0	1	0	0	0
chr7	74495584	74495783	intron (NM_001038643, intron 2 of 10)	59097	Slco3a1	1.27806	0.00489609	0.0762525	1.91527	2.42081e-05	0.00198112	1.96339	1.19341e-05	0.000990102	0.624817	0.147413	0.331094	0.584518	0.168584	0.331301	22.4272	52.4322	79.6432	106.052	120.031	172.999	148.23	153.873	313.487	143.121	230.179	231.095	0	0	1	0	1	0	0	0
chr7	19304279	19304478	3' UTR (NM_008036, exon 4 of 4)	5667	Fosb	0.766766	0.16034	0.59486	1.91527	0.00040331	0.0150851	-0.277207	0.613839	0.890448	-1.28707	0.0167967	0.0652026	1.11696	0.0376274	0.107921	36.6312	10.1482	53.3045	32.7515	78.3251	128.148	21.5733	18.9606	47.7045	30.945	49.5008	44.1181	0	0	1	0	0	0	0	0
chr7	16207637	16207836	intron (NM_001285931, intron 7 of 16)	14257	Dhx34	1.57407	0.00593525	0.0856559	1.91475	0.000877754	0.0262466	0.307614	0.595858	0.883	1.29237	0.0121904	0.0507976	3.38233	5.46178e-11	1.84117e-09	12.7088	5.07408	22.576	45.2282	24.413	60.8701	11.1346	13.8558	111.765	104.439	128.702	176.052	0	0	1	0	0	0	0	0
chr16	49774704	49774903	Intergenic	75509	Ift57	1.49964	0.0108111	0.126681	1.91392	0.00118401	0.0320088	1.77558	0.00221973	0.0436716	0.470463	0.390603	0.615102	-0.0609837	0.910393	0.951491	8.22332	15.2222	32.9234	38.9898	57.9809	38.4443	33.4039	53.6002	99.4981	36.7472	32.1755	49.1602	0	0	1	0	1	0	0	0
chr8	106017220	106017419	intron (NM_001301176, intron 2 of 14)	-5833	Ddx28	1.52444	0.00576264	0.0842333	1.91381	0.00054099	0.0185997	1.65255	0.00254642	0.0478155	-1.95289	0.000583345	0.00433057	-2.09714	0.000179909	0.0011108	17.1942	27.0618	50.169	87.3372	53.9121	128.148	98.8197	50.3185	20.4448	21.2747	14.8502	15.5464	0	0	1	0	1	0	0	1
chr4	150915295	150915494	Intergenic	-4761	Tnfrsf9	2.07467	7.69016e-06	0.000729688	1.91351	4.57365e-05	0.00315164	1.89655	3.84786e-05	0.0024697	0.757168	0.0789903	0.212626	0.997627	0.0169924	0.0568561	13.4563	28.7531	102.846	79.5393	70.1874	94.5089	63.3281	97.72	145.84	137.319	128.702	199.162	1	0	1	0	1	0	0	0
chr14	86861643	86861842	intron (NM_019670, intron 21 of 27)	279372	Diaph3	1.72142	0.00310199	0.0565515	1.91047	0.00111347	0.0308811	2.17071	0.000157286	0.0069619	1.26713	0.0182605	0.0694872	-0.116083	0.827194	0.903993	11.9612	10.1482	41.3894	43.6686	60.0153	36.8424	61.2404	57.2464	198.996	48.3516	51.9759	56.3031	0	0	1	0	1	0	0	0
chr6	7693168	7693367	promoter-TSS (NM_012055)	-85	Asns	1.69085	0.00092089	0.0246301	1.90996	0.000203889	0.00922804	1.81086	0.000326035	0.0117007	0.655614	0.161651	0.352832	-0.407811	0.383942	0.574148	15.6991	11.8395	46.4063	54.5858	67.1358	49.6572	48.714	60.1635	124.032	63.8241	42.0757	39.4962	1	0	1	0	1	0	0	0
chr14	122002344	122002543	intron (NM_026861, intron 7 of 8)	-32231	Timm8a2	1.31182	0.0254807	0.219286	1.9093	0.0011702	0.031799	1.76181	0.00212236	0.0423085	0.85128	0.1016	0.254672	0.979803	0.0493317	0.133627	6.72817	8.4568	19.1269	23.3939	31.5335	33.6387	21.5733	36.0981	65.4234	56.0879	49.5008	68.068	0	0	1	0	1	0	0	0
chr7	44590659	44590858	promoter-TSS (NM_001290682)	-128	Kcnc3	1.17534	0.0474145	0.31463	1.90913	0.00123927	0.0330671	1.10711	0.058675	0.322844	0.37938	0.488536	0.699098	1.76645	0.000910881	0.00464077	11.9612	8.4568	22.576	31.1919	25.4302	67.2775	34.7957	16.0436	68.1494	52.2197	86.6264	98.3204	0	0	1	0	0	0	0	0
chr14	56262271	56262470	promoter-TSS (NM_013542)	-36	Gzmb	0.720341	0.239922	0.710724	1.90888	0.00156773	0.0388922	1.93594	0.00103416	0.026501	0.176574	0.750774	0.87603	1.27953	0.0143475	0.0493807	8.22332	8.4568	13.4829	17.1555	20.3442	54.4627	32.7079	41.5675	51.7935	30.945	76.7263	112.606	0	0	1	0	1	0	0	0
chr18	60625449	60625648	Intergenic	-1243	Synpo	1.82612	0.000677341	0.0201166	1.90762	0.000432799	0.0157725	1.38644	0.0095494	0.112186	0.699551	0.160911	0.35172	0.884381	0.0719936	0.178584	18.6894	6.76544	63.3383	43.6686	71.2046	43.2498	32.7079	45.5784	124.032	67.6922	66.8261	82.3538	1	0	1	0	0	0	0	0
chr1	192062729	192062928	intron (NM_011633, intron 3 of 9)	29771	Traf5	1.46627	0.0182422	0.1767	1.90725	0.00220804	0.0491143	1.66223	0.00663884	0.0889467	0.604959	0.290945	0.516561	-0.194099	0.734321	0.846363	13.4563	1.69136	22.8896	32.7515	47.8088	27.2314	31.3161	31.7226	72.2383	46.4175	24.7504	28.9919	0	0	1	0	0	0	0	0
chr18	23805700	23805899	intron (NM_153058, intron 1 of 6)	1829	Mapre2	2.21164	1.81878e-06	0.000254113	1.90611	5.04884e-05	0.00333833	2.19002	1.91676e-06	0.000238738	1.33911	0.00166816	0.010221	0.691126	0.0958348	0.221166	20.1845	16.9136	98.7701	93.5756	86.4628	67.2775	91.8606	97.72	272.597	131.516	116.327	190.758	1	0	1	0	1	0	0	0
chr16	43694170	43694369	Intergenic	-30085	Tigit	2.27612	2.28422e-05	0.00168354	1.90105	0.000566564	0.0192321	2.39085	6.65379e-06	0.000617969	1.16351	0.0140552	0.0568491	0.591703	0.184191	0.352108	8.22332	6.76544	46.0927	40.5494	35.6023	30.4351	45.9303	48.86	94.0461	59.956	76.7263	70.1688	1	0	1	0	1	0	0	0
chr19	25078156	25078355	intron (NM_028785, intron 5 of 47)	78726	Dock8	1.73521	0.00367775	0.0632274	1.89884	0.00174137	0.0419626	1.44534	0.0146352	0.145686	1.888	0.000226652	0.00198544	3.06999	2.90781e-10	8.13479e-09	3.73787	8.4568	19.4405	26.5131	23.3958	27.2314	23.6611	13.1266	115.854	85.0988	121.277	215.128	0	0	1	0	0	0	1	0
chr4	55443564	55443763	Intergenic	-24821	Gm12505	2.77491	2.78679e-06	0.000347102	1.89571	0.00183124	0.0434184	2.18985	0.00021124	0.00858533	2.31597	1.25999e-05	0.000184546	1.42242	0.00545669	0.0218665	6.72817	6.76544	73.6857	42.109	36.6195	24.0277	48.018	29.1702	235.797	102.505	69.3011	144.539	1	0	1	0	1	0	1	0
chr7	117606807	117607006	intron (NM_175645, intron 5 of 11)	225927	Xylt1	1.8776	0.000976972	0.0257254	1.89512	0.000972219	0.0281967	1.84323	0.00110291	0.0276456	-0.622109	0.260637	0.481984	-0.635467	0.236349	0.41858	11.2136	15.2222	36.9996	73.3009	36.6195	73.6849	60.5445	44.4845	40.8896	27.0769	24.7504	38.2357	1	0	1	0	1	0	0	0
chr1	80381427	80381626	Intergenic	-40836	Cul3	1.62992	0.00120579	0.0296842	1.895	0.000186066	0.008599	2.25163	5.25112e-06	0.000510312	0.341094	0.463462	0.67921	-0.306885	0.49578	0.672831	8.9709	21.9877	42.6436	56.1454	52.8949	65.6757	81.4219	71.4669	88.5942	61.8901	64.3511	58.8242	1	0	1	0	1	0	0	0
chr5	139299447	139299646	intron (NM_172723, intron 3 of 10)	25918	Adap1	2.08164	0.000382528	0.0138808	1.89471	0.00134981	0.0349659	1.19234	0.0421223	0.268924	-1.7368	0.00387407	0.0202624	-0.437665	0.44408	0.628706	14.9515	16.9136	51.1096	104.493	47.8088	86.4996	42.4507	36.4627	9.54091	27.0769	14.8502	37.8155	1	0	1	0	0	0	0	1
chr14	103048705	103048904	intron (NM_008392, intron 1 of 4)	1792	Acod1	1.77873	0.000320299	0.0122144	1.88951	0.00015157	0.00737976	1.74222	0.000373006	0.0128518	0.00257356	0.995591	0.99809	-0.65006	0.160227	0.319646	20.1845	11.8395	68.9823	54.5858	51.8777	84.8978	52.1935	68.9145	68.1494	67.6922	34.6506	39.9164	1	0	1	0	1	0	0	0
chr7	141558332	141558531	Intergenic	-3749	Ap2a2	1.33186	0.0254974	0.219351	1.88871	0.00154095	0.0384212	1.92595	0.00102917	0.0264295	-1.04929	0.0734607	0.201856	-0.931245	0.0984574	0.225563	17.1942	6.76544	37.6267	32.7515	33.5679	75.2867	53.5854	56.5172	14.9929	34.8132	22.2754	31.0928	0	0	1	0	1	0	0	0
chr3	90081813	90082012	intron (NM_001293749, intron 1 of 7)	2391	Tpm3	1.45568	0.00970164	0.11815	1.88816	0.000842626	0.0254647	0.814856	0.147108	0.515232	0.289953	0.573615	0.761629	2.5295	3.05709e-07	3.939e-06	11.2136	6.76544	27.2794	31.1919	39.6712	40.0461	15.3101	20.4191	44.9786	54.1538	74.2512	150.842	0	0	1	0	0	0	0	0
chr11	86582220	86582419	Intergenic	1839	Mir21a	2.04656	6.58137e-05	0.00372186	1.88365	0.000277574	0.0117057	1.39849	0.00631496	0.086115	-0.578739	0.246227	0.465948	1.12455	0.0178786	0.0593514	24.67	10.1482	86.2279	82.6584	50.8605	100.916	43.1466	61.622	35.4377	63.8241	99.0016	137.817	1	0	1	0	0	0	0	0
chr3	139000179	139000378	intron (NM_001040690, intron 4 of 14)	74923	Rap1gds1	1.74842	0.000450993	0.0156107	1.8827	0.000175144	0.00818053	2.07291	2.60711e-05	0.00182708	0.0983736	0.835348	0.922673	-0.532681	0.252342	0.437283	17.1942	23.679	73.3721	73.3009	68.153	94.5089	109.258	76.9363	125.395	46.4175	61.876	63.8662	1	0	1	0	1	0	0	0
chr12	110689194	110689393	Intergenic	-6674	1700001K19Rik	1.38112	0.0221546	0.199817	1.88231	0.00184669	0.0436241	1.07518	0.0729738	0.360483	-1.13039	0.0581095	0.169285	0.111207	0.84597	0.915545	13.4563	10.1482	27.5929	43.6686	42.7228	59.2683	38.9712	17.1375	14.9929	29.011	34.6506	26.891	0	0	1	0	0	0	0	0
chr15	100060653	100060852	intron (NM_001159361, intron 1 of 37)	22088	Dip2b	1.68138	0.00269037	0.0510556	1.88048	0.000838062	0.0253586	1.10277	0.0485192	0.29002	0.725997	0.170525	0.365985	2.36352	5.38805e-06	4.97157e-05	23.9224	6.76544	52.3638	67.0625	30.5163	108.925	29.9243	46.6723	102.224	133.45	173.253	265.969	0	0	1	0	0	0	0	0
chr9	87025905	87026104	intron (NM_024195, intron 1 of 15)	3975	Cyb5r4	1.55474	0.00124635	0.030373	1.88017	9.83221e-05	0.00545018	1.8264	0.000131975	0.00618969	-1.92325	0.000100098	0.00101817	-1.60687	0.000730488	0.00382728	17.1942	55.8149	91.2448	127.887	151.564	123.342	119.001	145.122	40.8896	25.1428	42.0757	39.9164	0	0	1	0	1	0	0	1
chr8	46941425	46941624	Intergenic	-45363	Enpp6	2.11195	7.36244e-07	0.000123653	1.87943	1.19547e-05	0.00119058	1.66335	9.31412e-05	0.00486413	0.607717	0.140325	0.31952	0.646449	0.113222	0.249651	27.6603	77.8026	222.625	247.975	173.943	224.258	176.066	164.082	380.273	234.022	222.754	315.129	1	0	1	0	1	0	0	0
chr3	84772037	84772236	Intergenic	-43441	Fbxw7	1.95535	0.000794672	0.0223949	1.87897	0.00158241	0.0391757	1.20419	0.039097	0.258264	1.89016	0.000177445	0.0016264	2.78824	1.00044e-08	1.88519e-07	6.72817	5.07408	31.042	24.9535	22.3786	32.0369	16.7019	16.0436	147.203	65.7582	123.752	128.153	1	0	1	0	0	0	1	0
chr14	63124078	63124277	intron (NM_007798, intron 1 of 9)	1715	Ctsb	2.6008	2.27383e-06	0.000300282	1.87867	0.0010212	0.0291446	1.80859	0.00103068	0.0264491	2.8229	8.18021e-10	6.12271e-08	3.1281	3.29121e-13	1.96827e-11	6.72817	3.38272	38.2538	46.7878	26.4474	22.4258	27.1406	20.4191	246.701	133.45	210.378	239.919	1	0	1	0	1	0	1	0
chr17	28698222	28698421	intron (NM_001168514, intron 2 of 12)	5753	Mapk14	2.06398	0.000194869	0.00839417	1.87642	0.000885927	0.0264178	1.62278	0.00324469	0.0558019	0.680395	0.176782	0.375343	1.78742	0.000171236	0.00106455	11.9612	3.38272	37.6267	46.7878	31.5335	41.648	23.6611	36.0981	49.0675	71.5604	103.952	117.648	1	0	1	0	0	0	0	0
chr11	54807758	54807957	Intergenic	-12062	Lyrm7os	1.23481	0.0290835	0.237527	1.87552	0.000906032	0.026711	1.89662	0.000628869	0.0183958	-1.29875	0.0210195	0.0775076	-0.251745	0.627293	0.774758	8.9709	18.605	25.398	43.6686	42.7228	65.6757	59.1527	49.9539	17.7188	23.2088	34.6506	53.3619	0	0	1	0	1	0	0	0
chr1	153617515	153617714	Intergenic	-35423	Rgs8	2.29332	7.66242e-06	0.000728489	1.86962	0.000379849	0.0145369	1.76051	0.00056821	0.0171609	3.26109	1.32734e-13	4.92156e-11	3.17968	4.53494e-14	3.42623e-12	8.9709	8.4568	50.169	51.4666	34.5851	40.0461	32.7079	36.0981	556.099	226.286	297.005	384.458	1	0	1	0	1	0	1	0
chr9	44568192	44568391	Intergenic	-36601	Ddx6	1.41102	0.0192728	0.182956	1.86712	0.00198335	0.0459108	1.33699	0.0254711	0.202267	-2.62949	5.41479e-05	0.000616884	-1.1077	0.0623961	0.160116	15.6991	16.9136	31.9827	65.5029	46.7916	88.1015	44.5385	45.2138	2.72597	15.4725	12.3752	23.9498	0	0	1	0	0	0	0	1
chr1	155383997	155384196	intron (NM_011273, intron 2 of 14)	33348	Xpr1	0.70255	0.2469	0.718384	1.86631	0.00182713	0.0433635	1.41485	0.0165375	0.156887	-0.883493	0.12961	0.303171	-0.70671	0.214455	0.391382	6.72817	16.9136	20.3811	17.1555	41.7056	49.6572	32.012	32.8164	27.2597	19.3406	17.3253	20.1683	0	0	1	0	0	0	0	0
chr8	66497152	66497351	Intergenic	-10744	Tma16	0.822709	0.160536	0.595106	1.86572	0.0013507	0.0349659	1.84959	0.00131624	0.0311466	-0.790121	0.16618	0.359669	-2.03869	0.00045704	0.00253017	20.1845	20.2963	42.3301	32.7515	73.2391	92.907	59.1527	103.554	76.3273	13.5384	19.8003	15.9666	0	0	1	0	1	0	0	0
chr6	108165042	108165241	intron (NM_145937, intron 3 of 8)	20442	Sumf1	1.63848	0.000928557	0.0247968	1.86561	0.000170743	0.00803337	1.8716	0.000139643	0.0064203	1.12368	0.0176888	0.0677825	0.775255	0.0982764	0.225223	14.2039	55.8149	110.372	113.85	136.306	128.148	141.966	123.973	430.704	168.264	230.179	237.818	1	0	1	0	1	0	0	0
chr7	112238802	112239001	intron (NM_001193305, intron 2 of 25)	13065	Mical2	1.61661	0.00122426	0.029999	1.86529	0.000212286	0.00950105	1.47925	0.00281693	0.0510539	-0.283227	0.550556	0.745468	0.295258	0.517669	0.691114	13.4563	18.605	43.5843	62.3837	51.8777	73.6849	50.1058	44.1199	59.9714	40.6153	59.401	57.5637	1	0	1	0	0	0	0	0
chr9	110685236	110685435	intron (NM_028312, intron 1 of 6)	28832	Ccdc12	1.14909	0.0410606	0.289927	1.86365	0.000895261	0.0265887	0.968005	0.0818275	0.38238	-0.271871	0.607642	0.786572	1.76315	0.000471719	0.00260128	14.2039	8.4568	25.398	32.7515	35.6023	62.472	32.012	18.596	29.9857	50.2857	94.0516	89.4968	0	0	1	0	0	0	0	0
chr19	43530305	43530504	Intergenic	-5799	Got1	1.24203	0.0201027	0.18739	1.86015	0.000494825	0.0173466	1.28096	0.0151817	0.149174	-1.40373	0.00877484	0.039085	0.241465	0.626263	0.774049	18.6894	11.8395	34.8047	46.7878	54.9293	72.083	38.9712	43.3906	16.3558	29.011	37.1256	58.404	0	0	1	0	0	0	0	0
chr3	148491419	148491618	Intergenic	463117	Adgrl2	2.45154	4.01713e-05	0.00257024	1.85925	0.00223616	0.0494211	1.89395	0.00147526	0.0334953	1.56102	0.00459274	0.0232127	0.48784	0.369308	0.560338	4.48545	15.2222	56.1265	63.9433	45.7744	30.4351	48.018	31.3579	185.366	58.0219	56.9259	56.7233	1	0	1	0	1	0	0	0
chr1	60482995	60483194	TTS (NM_001045513)	73475	Abi2	0.927829	0.0834506	0.431366	1.85611	0.000492803	0.0172883	2.01744	0.000120688	0.00579544	-2.43349	2.00851e-05	0.000272026	-2.59464	1.63401e-06	1.74138e-05	12.7088	32.1358	30.1014	57.705	77.3079	91.3052	100.907	87.8751	14.9929	11.6044	12.3752	14.2859	0	0	1	0	1	0	0	1
chr15	78835186	78835385	Intergenic	-7362	Cdc42ep1	1.10234	0.0366748	0.271801	1.85208	0.000436417	0.0158405	1.3977	0.00764682	0.0972025	-2.0144	0.000173329	0.00159321	-0.667462	0.197665	0.369656	52.3302	37.2099	84.033	123.208	110.876	248.286	130.136	125.432	17.7188	63.8241	44.5507	106.304	0	0	1	0	0	0	0	1
chr15	79900877	79901076	intron (NM_001160415, intron 5 of 8)	5953	Apobec3	1.65275	0.00259547	0.0498723	1.85059	0.000827608	0.0251687	1.86319	0.000574925	0.0172548	0.0476279	0.926203	0.967553	0.940572	0.0523276	0.139871	9.71847	13.5309	41.7029	37.4302	32.5507	60.8701	32.7079	59.4342	43.6156	52.2197	74.2512	107.984	1	0	1	0	1	0	0	0
chr6	125483586	125483785	intron (NM_007657, intron 1 of 7)	11070	Cd9	1.75506	0.000696572	0.0205862	1.84957	0.000416337	0.0153898	1.23667	0.0164443	0.156355	1.97381	1.72378e-05	0.00023897	2.99335	1.9597e-11	7.41386e-10	14.2039	6.76544	46.7198	37.4302	30.5163	62.472	23.6611	34.2749	208.537	174.066	185.628	321.852	1	0	1	0	0	0	1	0
chr16	38403689	38403888	intron (NM_134102, intron 8 of 10)	29357	Pla1a	1.70782	0.000223811	0.00933786	1.84951	7.1689e-05	0.00434661	1.62995	0.000385588	0.0132034	0.885737	0.0411649	0.130481	0.741982	0.0824621	0.19797	23.1748	27.0618	84.9737	90.4564	112.91	80.0923	88.381	77.3009	263.057	102.505	138.602	144.119	1	0	1	0	1	0	0	0
chr1	133801013	133801212	Intergenic	-47365	Atp2b4	1.62076	8.25958e-05	0.00442365	1.84677	8.04283e-06	0.000875125	1.39369	0.00065821	0.0189642	-0.355885	0.370473	0.596724	0.152618	0.694689	0.820721	43.3593	28.7531	140.787	95.1352	115.962	166.592	92.5565	110.117	96.7721	121.846	116.327	110.926	1	0	1	0	0	0	0	0
chr5	65867468	65867667	intron (NM_001081105, intron 1 of 2)	3998	Rhoh	1.17252	0.0267239	0.225681	1.84562	0.000477157	0.0169035	1.46895	0.00503967	0.0746305	-0.975646	0.0612218	0.176033	-0.191937	0.705237	0.827404	29.903	23.679	45.7792	87.3372	52.8949	163.388	80.726	81.3118	62.6974	40.6153	59.401	79.4126	0	0	1	0	0	0	0	0
chr17	44569381	44569580	intron (NR_073425, intron 5 of 5)	166696	Runx2	1.74087	0.000110097	0.00549368	1.84361	4.97145e-05	0.00330986	2.064	3.36767e-06	0.000373169	-0.232956	0.586481	0.771122	-0.010161	0.980079	0.990352	20.1845	21.9877	81.8381	67.0625	61.0326	102.518	85.5974	103.554	70.8753	65.7582	84.1514	102.102	1	0	1	0	1	0	0	0
chr17	25224745	25224944	intron (NM_028789, intron 1 of 4)	2262	Unkl	1.5047	0.00288291	0.0537337	1.84274	0.00026831	0.0114149	1.37702	0.00617389	0.0848813	-1.14604	0.0226138	0.0819573	-0.0587091	0.904963	0.94851	50.8351	35.5186	119.151	148.161	96.6349	246.684	133.615	109.023	64.0604	83.1648	54.4509	170.17	0	0	1	0	0	0	0	0
chr6	114660026	114660225	intron (NM_001253718, intron 2 of 19)	17028	Atg7	1.50482	0.00131451	0.0315014	1.84218	8.64002e-05	0.00494158	1.56936	0.000749537	0.0209931	-1.65713	0.000473865	0.00365675	-1.66887	0.000372355	0.00211007	53.8254	33.8272	121.346	148.161	95.6177	249.888	119.001	161.53	51.7935	50.2857	32.1755	47.8997	0	0	1	0	0	0	0	1
chr7	101547755	101547954	Intergenic	7948	Art2a-ps	1.00457	0.0699719	0.390776	1.83902	0.000852816	0.0256922	1.84331	0.000599779	0.0177802	0.889933	0.0710422	0.197166	1.17296	0.012619	0.0444279	9.71847	10.1482	19.4405	24.9535	24.413	57.6664	43.1466	37.5566	74.9643	79.2966	89.1015	99.5809	0	0	1	0	1	0	0	0
chr5	64651538	64651737	Intergenic	-40938	Gm3716	-0.209744	0.694659	0.954594	1.83604	0.000381009	0.0145423	1.61276	0.00159182	0.0351002	0.00354624	0.994283	0.997719	0.535068	0.268636	0.45613	18.6894	30.4445	18.4998	23.3939	46.7916	142.564	77.9423	80.5826	107.676	79.2966	94.0516	137.817	0	0	1	0	1	0	0	0
chr11	55132006	55132205	intron (NM_172258, intron 7 of 10)	19601	Slc36a3	2.31381	2.87395e-07	5.6313e-05	1.83495	6.79006e-05	0.00420147	1.91202	2.04482e-05	0.00151871	0.543157	0.192896	0.397401	1.8315	2.79336e-06	2.77448e-05	16.4466	16.9136	93.4397	88.8968	57.9809	72.083	57.0649	79.1241	80.4162	112.176	195.528	307.987	1	0	1	0	1	0	0	0
chr9	33060670	33060869	Intergenic	-131803	Gm27162	0.214843	0.682862	0.9523	1.83443	0.000414047	0.015362	0.982948	0.0577225	0.320067	-1.82243	0.000534033	0.00402651	-0.438998	0.392827	0.582412	37.3787	57.5062	52.6774	57.705	82.3939	283.527	91.8606	102.096	64.0604	29.011	54.4509	83.1942	0	0	1	0	0	0	0	1
chr15	77801240	77801439	intron (NM_022410, intron 3 of 40)	40836	Myh9	1.48023	0.0099976	0.120206	1.83103	0.00146956	0.0371256	1.12578	0.0492767	0.292373	-2.4998	3.8397e-05	0.000464562	-0.481851	0.393212	0.582715	29.1554	20.2963	62.7112	92.016	42.7228	158.583	57.7608	59.7988	12.2669	17.4066	22.2754	55.4628	0	0	1	0	0	0	0	1
chr1	144300778	144300977	Intergenic	-51773	Rgs1	1.73575	0.00326879	0.0584647	1.83096	0.00209212	0.0475233	2.60872	7.14311e-06	0.000650873	-1.766	0.00395777	0.0206241	-2.44438	2.14855e-05	0.000169278	10.466	13.5309	58.9485	26.5131	52.8949	41.648	66.8077	100.637	17.7188	5.80219	14.8502	12.6052	0	0	1	0	1	0	0	1
chr4	86712774	86712973	Intergenic	-35682	Dennd4c	1.30804	0.00915014	0.114022	1.83091	0.000264129	0.0112807	1.83044	0.000233836	0.00917864	0.243439	0.616436	0.792612	-0.593324	0.221539	0.400354	29.1554	49.0494	105.355	96.6948	137.323	160.185	145.446	151.32	275.323	77.3626	61.876	125.211	0	0	1	0	1	0	0	0
chr2	169589883	169590082	Intergenic	-43664	Tshz2	2.48526	8.84032e-06	0.000819464	1.82836	0.00149831	0.0376742	2.18811	8.27642e-05	0.0044376	1.4949	0.0027219	0.0152319	1.45906	0.00187171	0.00871442	9.71847	3.38272	61.457	34.3111	27.4646	33.6387	43.8426	35.7335	113.128	67.6922	126.227	105.463	1	0	1	0	1	0	0	0
chr1	36293599	36293798	Intergenic	-14035	Arid5a	1.14196	0.0170543	0.168938	1.82703	0.00013105	0.00666719	1.47434	0.00180637	0.0379679	-1.04483	0.0267204	0.0935789	0.404249	0.367573	0.558519	38.1263	16.9136	66.4739	67.0625	74.2563	147.37	70.9832	98.4493	44.9786	58.0219	101.477	124.791	0	0	1	0	0	0	0	0
chr2	29632140	29632339	intron (NM_001039087, intron 1 of 25)	12519	Rapgef1	1.34669	0.00312115	0.0567442	1.82601	6.31645e-05	0.00396067	1.45011	0.00127613	0.0304967	-0.322711	0.459076	0.675325	1.44009	0.000505807	0.00277197	20.9321	30.4445	53.6181	84.218	75.2735	116.935	75.1587	70.373	55.8825	96.7032	185.628	223.112	0	0	1	0	0	0	0	0
chr7	66233408	66233607	Intergenic	123992	Chsy1	0.568997	0.348443	0.809872	1.8258	0.00221883	0.049264	1.85815	0.00147166	0.0334474	-0.566512	0.322221	0.549043	0.38567	0.470605	0.651655	8.9709	11.8395	16.3049	15.5959	30.5163	52.8609	29.9243	53.6002	28.6227	25.1428	39.6007	69.3285	0	0	1	0	1	0	0	0
chr1	155476312	155476511	Intergenic	50700	Gm5532	0.162327	0.768966	0.971303	1.82435	0.000767599	0.0237941	1.63856	0.00227762	0.0443318	-1.08514	0.0434266	0.135864	-0.969834	0.0660759	0.167165	23.9224	28.7531	33.2369	24.9535	67.1358	137.759	68.1995	108.294	62.6974	27.0769	24.7504	57.1435	0	0	1	0	1	0	0	0
chr17	66074048	66074247	intron (NM_001025572, intron 1 of 12)	2899	Ankrd12	2.43417	4.77381e-08	1.34566e-05	1.82315	6.26826e-05	0.00395211	1.93162	1.38973e-05	0.00112395	1.30323	0.00143633	0.00905373	0.923058	0.0198904	0.0646673	14.9515	23.679	102.533	120.089	79.3423	62.472	76.5505	77.6656	228.982	133.45	126.227	169.75	1	0	1	0	1	0	0	0
chr2	151959425	151959624	Intergenic	8093	Mir1953	1.32054	0.00212959	0.0437742	1.82191	2.30575e-05	0.00191623	2.22118	1.4429e-07	3.02394e-05	0.848019	0.0346643	0.114171	0.553651	0.156532	0.314487	32.1457	28.7531	93.4397	65.5029	102.738	129.749	127.352	180.49	275.323	148.923	200.478	255.885	0	0	1	0	1	0	0	0
chr3	152442886	152443085	intron (NM_001287139, intron 4 of 13)	46301	Zzz3	1.5309	0.00203377	0.042567	1.81585	0.00027473	0.0116367	1.89546	0.000105967	0.0053321	0.97368	0.0335486	0.111333	0.630266	0.158321	0.316971	8.9709	28.7531	46.7198	63.9433	74.2563	59.2683	67.5036	74.3839	155.381	116.044	91.5765	129.833	0	0	1	0	1	0	0	0
chr10	62544409	62544608	Intergenic	33949	Kif1bp	1.84639	0.000701505	0.0206813	1.81583	0.00104394	0.0295653	1.76397	0.00106107	0.0269899	0.557929	0.261807	0.483011	0.896124	0.0570995	0.149503	7.47575	11.8395	35.4318	40.5494	39.6712	33.6387	41.0589	30.264	53.1565	58.0219	54.4509	78.9925	1	0	1	0	1	0	0	0
chr5	64297159	64297358	intron (NM_001310611, intron 14 of 21)	66901	Tbc1d1	0.906167	0.104026	0.483817	1.81468	0.00105378	0.0297913	1.42718	0.00912467	0.109003	0.272364	0.60379	0.783748	1.13761	0.0261386	0.0808218	11.9612	23.679	27.9065	42.109	67.1358	67.2775	73.0709	28.8055	109.039	54.1538	143.552	93.2783	0	0	1	0	0	0	0	0
chr2	174517293	174517492	Intergenic	-44451	Prelid3b	1.88883	0.000172352	0.00770658	1.81383	0.000364925	0.0141286	1.66347	0.000865087	0.0231789	1.45411	0.0016669	0.010215	1.38859	0.00210716	0.00967143	18.6894	11.8395	60.8299	70.1817	71.2046	51.259	64.72	46.3076	252.153	100.571	133.652	167.649	1	0	1	0	1	0	0	0
chr19	18591124	18591323	intron (NM_017375, intron 5 of 9)	40590	Ostf1	1.08385	0.0471029	0.313296	1.8102	0.000886219	0.0264178	1.4966	0.00548893	0.0788167	-1.11555	0.0388252	0.124833	-0.761688	0.148583	0.302718	17.9418	28.7531	39.5081	65.5029	52.8949	124.944	66.1118	73.29	43.6156	32.8791	22.2754	52.5216	0	0	1	0	0	0	0	0
chr6	87916061	87916260	intron (NM_173737, intron 2 of 6)	2184	Hmces	2.17978	3.85435e-06	0.000447681	1.80914	0.000184199	0.00852906	1.76602	0.000168275	0.00731397	1.3148	0.00173953	0.0105709	1.69885	1.92376e-05	0.000153347	13.4563	10.1482	65.8468	56.1454	51.8777	41.648	52.1935	39.7443	137.662	104.439	155.928	154.203	1	0	1	0	1	0	0	0
chr3	84680168	84680367	intron (NM_177260, intron 1 of 6)	14075	Tmem154	1.6702	2.19062e-05	0.00163963	1.80513	5.03125e-06	0.000612415	1.77048	5.78877e-06	0.000551443	-0.471852	0.218649	0.43152	0.187513	0.613345	0.764038	57.5633	35.5186	141.1	179.353	139.358	213.045	169.803	172.104	149.929	98.6373	190.578	200.002	1	0	1	0	1	0	0	0
chr11	107428119	107428318	intron (NM_145823, intron 1 of 9)	42502	Pitpnc1	0.62658	0.208807	0.670904	1.80483	0.000247613	0.0107527	1.5517	0.00140791	0.0324729	-0.637663	0.182388	0.383455	0.774297	0.0889464	0.209162	23.9224	23.679	32.6098	45.2282	62.0498	120.138	70.2873	79.4887	51.7935	61.8901	84.1514	173.111	0	0	1	0	0	0	0	0
chr10	67098537	67098736	Intergenic	-1648	Reep3	1.45939	0.00303696	0.0557243	1.80473	0.000266956	0.0113673	1.58145	0.00112896	0.0280651	1.56969	0.000443772	0.00346801	1.83896	2.33095e-05	0.000181925	15.6991	16.9136	49.8554	46.7878	68.153	56.0646	32.7079	72.1962	242.612	145.055	170.778	228.154	0	0	1	0	0	0	0	0
chr5	147055868	147056067	intron (NM_080795, intron 1 of 9)	20605	Lnx2	2.20741	2.26093e-06	0.0002994	1.80414	0.000175461	0.00818739	1.49344	0.00137992	0.03204	2.38108	2.5212e-09	1.51719e-07	3.27814	4.44645e-18	9.48353e-16	11.9612	8.4568	52.6774	59.2645	31.5335	52.8609	34.0998	32.4518	253.516	203.077	309.38	381.517	1	0	1	0	0	0	1	0
chr8	122473939	122474138	intron (NM_001033142, intron 1 of 5)	2026	Rnf166	1.29508	0.0185735	0.178842	1.80252	0.00105446	0.029793	1.23772	0.023623	0.193817	-2.47445	1.95079e-05	0.000265403	-1.05106	0.054137	0.143538	28.4078	32.1358	69.2959	90.4564	56.9637	176.203	73.0709	78.7594	16.3558	19.3406	14.8502	49.1602	0	0	1	0	0	0	0	1
chr11	68453406	68453605	intron (NM_177320, intron 1 of 18)	21380	Pik3r5	1.04555	0.0399049	0.284794	1.80214	0.000387238	0.0146397	1.21416	0.0163298	0.155748	-2.26996	1.44601e-05	0.000206606	-0.162454	0.744031	0.852362	57.5633	42.284	92.1855	127.887	99.6865	283.527	105.779	141.111	28.6227	42.5494	59.401	153.783	0	0	1	0	0	0	0	1
chr13	45906390	45906589	intron (NM_001199304, intron 2 of 6)	58502	Atxn1	1.65089	0.00239611	0.0472961	1.80134	0.00108638	0.0303923	1.37052	0.0109721	0.121775	0.441535	0.371656	0.598049	2.07267	6.68332e-06	6.02261e-05	11.2136	5.07408	30.1014	32.7515	27.4646	43.2498	25.7488	25.1593	46.3416	50.2857	113.852	115.968	1	0	1	0	0	0	0	0
chr19	10747821	10748020	intron (NR_027805, intron 1 of 3)	6973	A430093F15Rik	0.827175	0.129038	0.537357	1.79572	0.000940611	0.0275284	0.88275	0.103068	0.432345	-2.2803	4.49054e-05	0.000526649	-0.0803664	0.880665	0.935206	37.3787	54.1235	73.9992	95.1352	76.2907	270.712	98.1238	77.3009	13.6299	50.2857	94.0516	72.6899	0	0	1	0	0	0	0	1
chr16	96273349	96273548	intron (NM_001122993, intron 2 of 3)	-7584	B3galt5	1.45547	0.00320836	0.057662	1.79408	0.000291805	0.0120966	1.79003	0.000250691	0.0096362	-0.938663	0.0543855	0.161019	-1.55021	0.00141233	0.00681861	19.4369	38.9013	90.3041	73.3009	97.6521	113.731	101.603	108.294	68.1494	36.7472	17.3253	44.5383	0	0	1	0	1	0	0	0
chr8	76902016	76902215	promoter-TSS (NM_001083906)	-393	Nr3c2	1.04185	0.0725225	0.398113	1.7934	0.00192596	0.0449782	1.93595	0.000655814	0.0189178	0.832011	0.123798	0.293277	-0.0907351	0.865206	0.926408	15.6991	11.8395	35.4318	26.5131	52.8949	57.6664	77.9423	45.2138	158.107	44.4835	71.7762	45.7988	0	0	1	0	1	0	0	0
chr2	180305681	180305880	Intergenic	-15901	Rbbp8nl	0.976456	0.0642993	0.373596	1.78987	0.000656924	0.0212803	1.82836	0.000400032	0.0134747	-1.92185	0.000445693	0.00348133	-1.24243	0.0136228	0.0472776	19.4369	18.605	36.3725	43.6686	50.8605	94.5089	67.5036	79.8533	21.8078	11.6044	22.2754	34.4542	0	0	1	0	1	0	0	1
chr18	24178787	24178986	Intergenic	-26458	Galnt1	0.924811	0.0859934	0.437744	1.78776	0.000840765	0.0254244	1.88927	0.000315986	0.0114776	-0.630237	0.222759	0.436924	-1.95181	0.000203931	0.00124162	11.9612	20.2963	26.3387	37.4302	47.8088	70.4812	55.6731	70.0084	35.4377	38.6813	17.3253	13.4455	0	0	1	0	1	0	0	0
chr5	135115362	135115561	intron (NM_021455, intron 2 of 16)	8570	Mlxipl	1.96235	3.53453e-06	0.000418603	1.78611	3.06815e-05	0.00234747	2.033	1.26029e-06	0.000173567	0.592805	0.136383	0.313492	0.512623	0.183039	0.350632	29.903	23.679	97.5159	132.565	99.6865	100.916	92.5565	145.851	163.558	143.121	136.127	204.624	1	0	1	0	1	0	0	0
chr17	86187886	86188085	intron (NM_011104, intron 1 of 14)	20200	Prkce	0.427959	0.41616	0.851827	1.7819	0.000584652	0.019584	2.43409	1.73458e-06	0.000222368	-0.253144	0.611978	0.789757	-0.679679	0.159899	0.319267	28.4078	15.2222	26.6523	37.4302	57.9809	113.731	102.299	170.645	89.9571	50.2857	61.876	101.262	0	0	1	0	1	0	0	0
chr17	79379253	79379452	Intergenic	-24261	Cdc42ep3	0.918669	0.0797284	0.421241	1.77969	0.000640705	0.0209805	2.02087	7.82222e-05	0.00426041	-1.54343	0.00355902	0.0189329	-1.65645	0.000998516	0.00503773	13.4563	27.0618	42.9572	32.7515	68.153	76.8886	76.5505	95.1677	31.3487	13.5384	27.2254	24.37	0	0	1	0	1	0	0	0
chr17	65961650	65961849	Intergenic	-10562	Twsg1	2.18414	6.16588e-06	0.000617895	1.77938	0.000286206	0.0119443	1.69223	0.000443152	0.0143406	0.40578	0.375849	0.601982	0.168555	0.707271	0.828701	29.1554	6.76544	98.4566	98.2544	64.0842	83.296	59.1527	78.0302	107.676	88.967	81.6763	74.7907	1	0	1	0	1	0	0	0
chr14	49173890	49174089	intron (NM_027492, intron 2 of 4)	1743	Naa30	1.89286	0.000422193	0.0149857	1.77649	0.00112553	0.0311392	1.58688	0.00291958	0.0521351	0.510502	0.30516	0.531482	0.670059	0.162711	0.323343	14.2039	6.76544	34.1776	62.3837	42.7228	43.2498	37.5793	37.192	61.3344	63.8241	71.7762	52.9418	1	0	1	0	0	0	0	0
chr11	102087315	102087514	intron (NM_016695, intron 1 of 12)	1101	Mpp2	2.03451	0.000250641	0.0101781	1.7761	0.00145392	0.0368463	1.37841	0.0130564	0.135372	-1.58594	0.00471806	0.0237168	0.331537	0.542467	0.710022	74.0099	11.8395	227.015	182.472	125.117	214.647	130.832	121.056	23.1708	81.2307	126.227	193.7	1	0	1	0	0	0	0	1
chr3	37161122	37161321	Intergenic	-35267	Il2	1.20495	0.0300729	0.242404	1.77102	0.00152289	0.0381378	2.20306	3.79388e-05	0.00244482	2.15179	3.89337e-06	6.9843e-05	2.19116	3.6794e-07	4.64887e-06	5.9806	8.4568	21.6354	12.4767	30.5163	24.0277	44.5385	31.7226	139.025	123.78	153.453	211.767	0	0	1	0	1	0	1	0
chr2	117447007	117447206	Intergenic	-104229	Rasgrp1	1.22704	0.00427066	0.069663	1.77027	3.73917e-05	0.00273084	1.46734	0.000566665	0.0171358	-0.576028	0.170755	0.366306	-0.450026	0.279015	0.467778	32.1457	74.4198	134.829	115.41	189.201	182.61	139.183	159.342	156.744	87.0329	91.5765	121.43	0	0	1	0	0	0	0	0
chr14	68051036	68051235	Intergenic	-32749	Nefl	2.03402	9.09883e-06	0.000838588	1.76955	0.000130163	0.00665474	1.2329	0.00715693	0.0934647	0.232694	0.599248	0.780589	0.86817	0.0465224	0.127842	29.903	38.9013	171.202	127.887	109.859	139.361	89.0769	79.4887	218.078	73.4944	163.353	153.363	1	0	1	0	0	0	0	0
chr1	52012363	52012562	intron (NM_001308266, intron 3 of 24)	4222	Stat4	1.57464	0.00418292	0.0687905	1.76763	0.00144658	0.0366796	1.22434	0.0249451	0.200067	-0.790691	0.141943	0.322146	0.987753	0.0464926	0.127782	14.9515	6.76544	32.6098	45.2282	44.7572	43.2498	33.4039	25.8885	27.2597	21.2747	64.3511	58.404	0	0	1	0	0	0	0	0
chr11	46362663	46362862	intron (NM_010583, intron 4 of 16)	26753	Itk	1.25295	0.023827	0.209974	1.76357	0.00148002	0.0373311	1.78301	0.00111282	0.0278437	0.11369	0.830264	0.92047	1.02934	0.0446909	0.123883	17.1942	20.2963	38.8809	59.2645	32.5507	110.527	47.3221	94.803	61.3344	92.8351	126.227	176.893	0	0	1	0	1	0	0	0
chr15	73146888	73147087	intron (NM_153178, intron 1 of 18)	37960	Ago2	1.31103	0.00131765	0.0315272	1.76124	1.61556e-05	0.00147981	1.54419	0.000139481	0.0064203	-1.77445	1.91447e-05	0.00026105	-1.15526	0.00413403	0.0172616	74.7575	69.3458	189.388	182.472	170.891	345.999	230.347	209.661	69.5123	73.4944	64.3511	120.59	0	0	1	0	0	0	0	1
chr13	109843074	109843273	intron (NM_011056, intron 7 of 16)	-60636	Mir1904	1.93239	7.39801e-05	0.00404766	1.76064	0.000353842	0.013816	2.33406	1.34048e-06	0.000182011	0.467195	0.314054	0.541146	-0.237511	0.599299	0.753257	20.9321	23.679	91.8719	93.5756	80.3595	83.296	91.8606	155.331	167.647	59.956	116.327	94.5388	1	0	1	0	1	0	0	0
chr4	152185667	152185866	promoter-TSS (NM_001146057)	-368	Acot7	1.62679	0.000809545	0.0226213	1.75937	0.000318345	0.0129199	1.73247	0.000319754	0.0115798	1.07021	0.0195247	0.0732111	1.75155	8.78936e-05	0.000592042	32.8933	13.5309	91.8719	70.1817	69.1702	112.129	61.2404	114.493	238.523	152.791	232.654	392.441	1	0	1	0	1	0	0	0
chr11	108216177	108216376	intron (NM_011101, intron 2 of 16)	127612	Prkca	1.33925	0.00771733	0.10206	1.75874	0.000474389	0.0168508	1.32777	0.00787284	0.0992382	-2.22593	2.1451e-05	0.000287296	-0.943902	0.0570393	0.149392	53.8254	20.2963	87.7957	120.089	82.3939	200.231	96.732	107.565	23.1708	30.945	61.876	42.8576	0	0	1	0	0	0	0	1
chr8	72353805	72354004	intron (NM_007944, intron 22 of 23)	34842	Klf2	0.36128	0.510859	0.89808	1.75822	0.001185	0.0320177	0.699161	0.196	0.58804	-1.71415	0.00189826	0.0113383	-0.168696	0.752037	0.857551	35.8836	18.605	41.3894	31.1919	53.9121	155.379	48.018	46.6723	21.8078	36.7472	47.0258	37.8155	0	0	1	0	0	0	0	1
chr6	140598633	140598832	Intergenic	-23931	Aebp2	1.9415	3.79325e-05	0.0024675	1.75793	0.000246615	0.010719	1.77409	0.000146529	0.00664856	1.16279	0.0067898	0.0317626	0.686568	0.0997256	0.227668	15.6991	15.2222	65.2196	65.5029	53.9121	60.8701	60.5445	55.4233	170.373	92.8351	84.1514	103.783	1	0	1	0	1	0	0	0
chr13	17975902	17976101	Intergenic	17350	Yae1d1	1.18202	0.0107707	0.126284	1.75465	0.000152638	0.00740188	1.73687	0.000145962	0.00663743	0.199348	0.653163	0.817675	0.131283	0.763273	0.864477	38.1263	27.0618	74.9399	84.218	86.4628	155.379	92.5565	143.663	186.729	88.967	121.277	138.237	0	0	1	0	1	0	0	0
chr8	111030118	111030317	intron (NM_001190786, intron 1 of 11)	1534	Ddx19b	1.50903	0.00175208	0.0384718	1.74954	0.000319475	0.0129406	1.89909	6.22099e-05	0.00357833	1.10023	0.0126715	0.0523477	0.464708	0.279627	0.468609	17.9418	15.2222	49.5418	54.5858	57.9809	65.6757	73.0709	64.539	162.195	110.242	61.876	123.951	0	0	1	0	1	0	0	0
chr7	19301552	19301751	Intergenic	8394	Fosb	1.28745	0.0223893	0.20127	1.74865	0.00197667	0.0457855	0.326172	0.564827	0.870389	-0.84529	0.126296	0.29734	1.63372	0.00199618	0.00922885	18.6894	6.76544	45.1521	24.9535	44.7572	57.6664	16.7019	18.596	27.2597	27.0769	59.401	59.6645	0	0	1	0	0	0	0	0
chr5	3301236	3301435	Intergenic	-42558	Cdk6	1.24927	0.00516696	0.0788657	1.74608	9.5111e-05	0.00530942	1.83869	2.82043e-05	0.00193938	0.846108	0.0422305	0.133028	0.773436	0.0566156	0.148587	23.9224	30.4445	50.4825	87.3372	91.5488	100.916	95.3402	109.753	231.708	119.912	180.678	178.153	0	0	1	0	1	0	0	0
chr5	3152115	3152314	Intergenic	-191679	Cdk6	1.27877	0.0179537	0.174935	1.7458	0.0012545	0.0332799	2.07211	9.84573e-05	0.00507034	1.37268	0.00682137	0.031867	0.800357	0.107764	0.240884	27.6603	8.4568	59.5756	40.5494	57.9809	86.4996	66.1118	115.951	286.227	106.374	141.077	186.136	0	0	1	0	1	0	0	0
chr18	39049085	39049284	intron (NM_175164, intron 1 of 22)	56039	Arhgap26	0.857335	0.0982174	0.469507	1.7389	0.000739349	0.0231266	1.76201	0.000502141	0.015656	-0.519495	0.297376	0.52336	-0.672536	0.165773	0.327482	15.6991	25.3704	24.7709	54.5858	62.0498	83.296	64.0241	82.4057	50.4305	48.3516	39.6007	48.74	0	0	1	0	1	0	0	0
chr14	121035368	121035567	promoter-TSS (NM_134082)	-107	Farp1	2.4327	2.29774e-09	1.10755e-06	1.73815	2.80449e-05	0.00220525	2.33932	7.5559e-09	2.80161e-06	0.833083	0.0299035	0.102054	0.21422	0.563588	0.725981	34.3884	21.9877	169.32	169.996	123.082	81.6941	177.458	140.381	226.256	146.989	195.528	176.052	1	0	1	0	1	0	0	0
chr2	75892110	75892309	intron (NM_172666, intron 13 of 19)	46253	Ttc30b	1.013	0.0401254	0.285818	1.73778	0.000413549	0.0153574	1.41521	0.00347104	0.0582966	1.40757	0.00184016	0.0110667	1.21843	0.0061552	0.0242317	18.6894	20.2963	47.0334	34.3111	56.9637	84.8978	49.4099	61.622	257.605	131.516	96.5266	168.069	0	0	1	0	0	0	0	0
chr1	127677723	127677922	5' UTR (NM_028135, exon 1 of 8)	199	Tmem163	1.93743	0.000126289	0.00608132	1.7361	0.000735897	0.0230763	1.75228	0.00047296	0.0149984	0.625443	0.182138	0.383111	0.349471	0.440719	0.625843	17.9418	6.76544	51.1096	63.9433	45.7744	52.8609	45.9303	53.2355	88.5942	65.7582	71.7762	58.404	1	0	1	0	1	0	0	0
chr13	6635257	6635456	intron (NM_019703, intron 2 of 21)	13415	Pfkp	1.49895	0.00449786	0.0719807	1.73522	0.00110684	0.0307502	1.39556	0.00750764	0.0961689	-0.461402	0.364209	0.591044	-0.545511	0.272745	0.460744	12.7088	15.2222	43.5843	40.5494	50.8605	49.6572	45.9303	32.8164	36.8007	34.8132	22.2754	28.5717	0	0	1	0	0	0	0	0
chr17	45570000	45570199	intron (NM_008302, intron 6 of 10)	3162	Hsp90ab1	1.0384	0.0674609	0.383733	1.73466	0.00220445	0.0490576	1.20762	0.0315383	0.227228	-0.2839	0.605349	0.784826	0.545793	0.31025	0.50161	23.1748	16.9136	28.8471	63.9433	77.3079	73.6849	77.9423	25.1593	47.7045	75.4285	61.876	89.0766	0	0	1	0	0	0	0	0
chr2	180437620	180437819	Intergenic	-23259	Slco4a1	0.99901	0.0605235	0.361193	1.73078	0.00111901	0.0310171	0.968611	0.0640654	0.337421	1.10035	0.0196436	0.0735141	2.12088	3.43631e-06	3.31606e-05	8.9709	13.5309	20.0676	28.0727	39.6712	40.0461	20.1815	25.1593	88.5942	88.967	84.1514	125.632	0	0	1	0	0	0	0	0
chr4	145099889	145100088	exon (NM_001276465, exon 41 of 70)	90678	Vps13d	1.40413	0.00183168	0.0396813	1.73052	0.000130272	0.00665474	1.84997	3.18708e-05	0.00214151	-2.65543	1.33226e-07	4.26411e-06	-2.97755	4.2232e-10	1.13852e-08	29.903	32.1358	86.855	84.218	82.3939	136.157	112.738	122.879	14.9929	15.4725	9.90016	14.706	0	0	1	0	1	0	0	1
chr16	92818569	92818768	intron (NM_001111022, intron 2 of 6)	7406	Runx1	1.45048	0.000719157	0.0209582	1.72693	5.83461e-05	0.00372503	1.58267	0.000208316	0.00851674	-1.17561	0.00610344	0.0290997	-0.347307	0.406795	0.594967	93.4469	52.4322	198.167	227.701	195.304	325.175	226.172	241.018	155.381	63.8241	153.453	207.145	0	0	1	0	0	0	0	0
chr9	61664065	61664264	Intergenic	250346	Rplp1	1.16602	0.0358202	0.26859	1.72617	0.00188334	0.0442688	1.43674	0.00900904	0.108245	0.221261	0.679565	0.834196	1.59236	0.0023312	0.0105668	29.903	16.9136	60.2027	56.1454	36.6195	142.564	58.4567	83.8642	81.7792	127.648	138.602	319.331	0	0	1	0	0	0	0	0
chr4	145315145	145315344	promoter-TSS (NM_009401)	-97	Tnfrsf8	1.70582	0.00097388	0.02568	1.72427	0.000958732	0.0278894	1.64104	0.00137901	0.03204	1.76217	0.000245013	0.00212145	1.34864	0.00424628	0.0176493	20.1845	13.5309	82.7788	38.9898	76.2907	49.6572	57.7608	61.622	329.843	127.648	173.253	148.321	1	0	1	0	1	0	1	0
chr7	3290227	3290426	promoter-TSS (NM_016969)	-229	Myadm	1.62738	0.0010898	0.0277205	1.72425	0.000616043	0.0203613	1.52659	0.00197338	0.0402543	-0.315819	0.50946	0.714843	-0.477449	0.306463	0.497529	13.4563	20.2963	58.3214	49.907	57.9809	59.2683	52.1935	49.2247	57.2455	34.8132	37.1256	34.8743	1	0	1	0	0	0	0	0
chr8	122548927	122549126	intron (NM_001037298, intron 1 of 50)	2303	Piezo1	1.52329	0.000540675	0.0173331	1.72011	0.000107118	0.00578843	1.09083	0.0127375	0.133385	0.97494	0.0164202	0.0641191	2.79526	1.00996e-12	5.35557e-11	23.9224	20.2963	59.8892	79.5393	62.0498	97.7126	51.4976	49.2247	119.943	201.143	314.33	429.837	0	0	1	0	0	0	0	0
chr14	73049120	73049319	promoter-TSS (NM_001162412)	-105	Cysltr2	1.94427	8.40025e-05	0.00447908	1.7192	0.00061125	0.0202637	1.8394	0.000177152	0.00756342	0.595757	0.199975	0.407281	0.594458	0.185134	0.353335	17.1942	16.9136	65.2196	81.0989	51.8777	72.083	54.2813	79.4887	100.861	88.967	61.876	138.237	1	0	1	0	1	0	0	0
chr12	100994729	100994928	intron (NM_026681, intron 3 of 29)	26940	Mir1190	1.01223	0.0162193	0.163694	1.71271	4.6006e-05	0.00315446	1.17984	0.00473316	0.071722	0.020153	0.960739	0.983673	1.09534	0.00662222	0.0258193	74.7575	52.4322	145.804	121.648	143.427	304.351	162.844	140.746	272.597	177.934	257.404	404.626	0	0	1	0	0	0	0	0
chr13	96697886	96698085	Intergenic	-27049	Hmgcr	1.48621	0.00687701	0.0942523	1.71143	0.00204984	0.0468499	1.58043	0.00355462	0.0590827	0.663989	0.190316	0.394022	0.753902	0.122993	0.264961	10.466	11.8395	30.7285	38.9898	36.6195	44.8517	47.3221	26.9824	73.6013	58.0219	47.0258	77.3118	0	0	1	0	0	0	0	0
chr2	127338958	127339157	TTS (NM_010090)	418	Astl	1.46108	0.00287394	0.0536521	1.70655	0.000519607	0.0180318	1.23541	0.0113174	0.12401	-1.22085	0.0130044	0.0534296	-0.142139	0.764942	0.865696	27.6603	45.6667	103.16	107.612	85.4456	168.194	83.5096	94.803	32.7117	71.5604	51.9759	103.783	0	0	1	0	0	0	0	0
chr9	62510677	62510876	intron (NM_175484, intron 1 of 11)	26268	Coro2b	1.98536	3.16333e-05	0.0021567	1.70634	0.000406328	0.0151756	1.71941	0.000293802	0.0108603	-1.70827	0.000582028	0.00432212	-1.31675	0.00486743	0.0198544	26.9127	25.3704	110.999	113.85	77.3079	107.324	110.65	75.1132	14.9929	38.6813	27.2254	40.7567	1	0	1	0	1	0	0	1
chr10	75839135	75839334	Intergenic	-4353	Gstt2	2.48906	1.14284e-06	0.00017488	1.7043	0.0012462	0.0331325	1.90992	0.000182456	0.00774867	2.79751	7.10012e-10	5.4581e-08	2.93059	1.01606e-11	4.13999e-10	7.47575	13.5309	67.7281	62.3837	29.4991	44.8517	25.0529	59.4342	313.487	245.626	284.63	424.795	1	0	1	0	1	0	1	0
chr7	38227865	38228064	promoter-TSS (NM_024413)	30	Plekhf1	1.25121	0.016159	0.163325	1.70214	0.0010953	0.030553	1.88669	0.000226022	0.00895949	-1.38062	0.00874805	0.0389969	-1.92526	0.000174611	0.00108291	19.4369	20.2963	47.9741	53.0262	62.0498	78.4904	73.7668	85.6874	35.4377	13.5384	27.2254	14.706	0	0	1	0	1	0	0	0
chr2	151974160	151974359	promoter-TSS (NM_001289151)	-278	Fam110a	1.84363	8.36156e-05	0.00446834	1.69946	0.000344361	0.0136428	2.04984	9.85972e-06	0.000844153	1.55011	0.000361563	0.00292725	1.35712	0.00124829	0.0061223	19.4369	21.9877	90.6177	68.6221	74.2563	70.4812	55.6731	129.807	265.782	177.934	215.329	279.835	1	0	1	0	1	0	0	0
chr3	157938649	157938848	Intergenic	-8718	Ankrd13c	1.06219	0.0346186	0.263334	1.69802	0.000720318	0.0226637	2.21525	7.74051e-06	0.000689663	-1.20638	0.0162188	0.0635054	-2.0011	5.02206e-05	0.000361491	40.369	25.3704	84.9737	60.8241	121.048	113.731	118.305	222.787	57.2455	38.6813	17.3253	55.0426	0	0	1	0	1	0	0	0
chr14	34363486	34363685	Intergenic	-8192	Fam25c	0.621496	0.2532	0.724347	1.69802	0.00160769	0.0396378	1.3754	0.00957066	0.112381	0.490817	0.33427	0.561293	0.181195	0.719199	0.836548	26.1651	8.4568	28.5336	31.1919	63.067	68.8793	50.1058	53.6002	129.484	58.0219	44.5507	71.0092	0	0	1	0	0	0	0	0
chr10	13997393	13997592	intron (NM_010437, intron 1 of 8)	31113	Hivep2	1.65613	0.00208921	0.0432763	1.68698	0.00204587	0.0467813	1.78376	0.000764797	0.0213461	1.16284	0.0165846	0.0645772	1.65011	0.00030729	0.00178008	5.9806	15.2222	28.5336	42.109	33.5679	36.8424	32.012	43.026	72.2383	92.8351	106.427	141.598	1	0	1	0	1	0	0	0
chr7	19303903	19304102	3' UTR (NM_008036, exon 4 of 4)	6043	Fosb	0.724916	0.098318	0.469832	1.68695	0.000107629	0.00580305	0.193087	0.658485	0.907639	-1.50801	0.000639055	0.00465959	0.783548	0.0654246	0.165825	44.1069	40.5926	84.033	57.705	123.082	166.592	47.3221	50.6832	32.7117	65.7582	89.1015	84.4547	0	0	1	0	0	0	0	0
chr9	123806365	123806564	promoter-TSS (NM_030712)	-13	Cxcr6	0.715828	0.0742082	0.403086	1.68669	2.22551e-05	0.00187542	1.50965	0.000116676	0.00566756	0.400808	0.287249	0.512326	0.780433	0.0336136	0.0987171	42.6118	38.9013	69.2959	68.6221	114.945	163.388	114.13	129.443	216.715	150.857	170.778	250.003	0	0	1	0	0	0	0	0
chr2	93424621	93424820	intron (NM_001136055, intron 6 of 9)	-2713	Mir7001	1.60047	0.00251739	0.0488107	1.68395	0.00152387	0.0381378	1.56233	0.00308504	0.0540367	-1.08243	0.0409849	0.130056	-0.0295471	0.954501	0.976259	71.0196	25.3704	144.549	182.472	75.2735	273.916	107.171	208.931	72.2383	83.1648	126.227	181.515	1	0	1	0	0	0	0	0
chr9	89208921	89209120	Intergenic	-2170	Mthfs	1.75729	0.000291622	0.0113361	1.68189	0.00061056	0.0202548	2.4552	2.84432e-07	5.29351e-05	1.63509	0.000282468	0.00238628	1.01426	0.0196316	0.0639857	22.4272	15.2222	81.211	60.8241	64.0842	72.083	82.1178	155.331	308.035	135.384	274.73	224.792	1	0	1	0	1	0	1	0
chr15	51736776	51736975	Intergenic	128586	Eif3h	1.1532	0.0306434	0.245007	1.67942	0.0016471	0.0403627	2.17702	3.50706e-05	0.00231571	-1.40956	0.00879172	0.0391301	-2.53353	2.21248e-06	2.26328e-05	23.1748	33.8272	69.6094	62.3837	94.6005	100.916	98.1238	181.949	53.1565	13.5384	12.3752	26.891	0	0	1	0	1	0	0	0
chr11	21222917	21223116	Intergenic	-16016	Vps54	0.81317	0.133239	0.545494	1.67863	0.00181215	0.0430717	1.60093	0.0023443	0.0451958	1.37827	0.0048075	0.0240785	1.8425	9.20752e-05	0.000616932	10.466	16.9136	17.8727	34.3111	35.6023	59.2683	44.5385	44.1199	129.484	127.648	103.952	229.414	0	0	1	0	1	0	0	0
chr13	23432630	23432829	Intergenic	-1712	C230035I16Rik	1.45311	0.00167727	0.0374099	1.67849	0.000318612	0.0129199	1.34152	0.00337304	0.0572264	-0.406227	0.36268	0.589752	0.50136	0.235378	0.417382	20.1845	20.2963	58.635	59.2645	61.0326	78.4904	47.3221	60.8927	59.9714	42.5494	74.2512	81.0933	0	0	1	0	0	0	0	0
chr11	97115261	97115460	promoter-TSS (NM_019507)	-29	Tbx21	1.53577	0.00280889	0.0527647	1.6776	0.00125252	0.0332638	1.28449	0.0116933	0.126604	-0.488156	0.326677	0.553673	0.92703	0.0442733	0.122972	13.4563	13.5309	41.7029	43.6686	50.8605	43.2498	35.4916	35.3688	24.5338	42.5494	71.7762	68.068	0	0	1	0	0	0	0	0
chr12	69537763	69537962	Intergenic	45166	Vcpkmt	0.589646	0.242941	0.714008	1.67227	0.000796462	0.0244997	1.11343	0.0233287	0.192122	1.39828	0.00205174	0.0120729	2.20678	5.96458e-07	7.11293e-06	14.2039	20.2963	27.2794	24.9535	39.6712	78.4904	30.6202	46.3076	201.722	117.978	178.203	204.624	0	0	1	0	0	0	0	0
chr7	28792461	28792660	intron (NM_177158, intron 4 of 11)	3591	Rinl	1.1796	0.011715	0.133206	1.67112	0.000357273	0.0138993	1.05006	0.0240986	0.196146	-1.75436	0.000234629	0.00204587	-0.254297	0.579355	0.737965	44.1069	62.5803	103.787	148.161	92.566	267.508	116.218	111.211	50.4305	48.3516	76.7263	109.245	0	0	1	0	0	0	0	1
chr16	36985874	36986073	Intergenic	-6837	Fbxo40	0.508904	0.341194	0.80471	1.67039	0.00157233	0.0389662	1.74132	0.000814808	0.0223156	-0.0269908	0.957598	0.982169	-0.588157	0.240549	0.423606	16.4466	28.7531	35.4318	28.0727	66.1186	86.4996	66.8077	92.6153	110.402	36.7472	49.5008	53.7821	0	0	1	0	1	0	0	0
chr5	135106737	135106936	promoter-TSS (NM_021455)	-55	Mlxipl	1.50399	0.002648	0.0506272	1.66793	0.000968834	0.0281324	1.4954	0.00248418	0.0471675	-0.286572	0.550755	0.745631	0.270815	0.551541	0.716905	11.9612	20.2963	43.8978	51.4666	47.8088	59.2683	45.2344	48.4954	49.0675	36.7472	54.4509	59.2443	0	0	1	0	0	0	0	0
chr4	43973515	43973714	intron (NM_027450, intron 4 of 4)	-9890	Ccin	0.255066	0.569118	0.920907	1.66655	0.000156592	0.00754807	1.43222	0.0010146	0.0261168	-1.92835	2.55635e-05	0.00033321	-1.17521	0.00665795	0.0259502	41.1166	42.284	49.2283	51.4666	99.6865	181.009	107.867	126.89	42.2526	25.1428	44.5507	54.2023	0	0	1	0	0	0	0	1
chr4	88938456	88938655	intron (NR_132735, intron 1 of 2)	3487	LOC106557447	1.91449	0.000265364	0.0106238	1.66642	0.00165307	0.0404473	2.12802	4.50525e-05	0.0027931	0.264636	0.603279	0.783382	-0.494024	0.324097	0.515557	11.2136	42.284	97.5159	113.85	124.1	49.6572	125.264	121.056	134.936	77.3626	81.6763	89.0766	1	0	1	0	1	0	0	0
chr4	139203541	139203740	intron (NM_001271405, intron 1 of 8)	9529	Capzb	1.24881	0.0141902	0.150461	1.66575	0.00108903	0.0304485	1.25606	0.0129675	0.134973	-0.857606	0.089124	0.232151	0.494036	0.310802	0.502313	20.1845	47.3581	69.6094	96.6948	76.2907	148.972	73.7668	91.5214	40.8896	79.2966	81.6763	151.682	0	0	1	0	0	0	0	0
chr17	29393710	29393909	Intergenic	32895	Fgd2	1.33757	0.0102191	0.121938	1.66477	0.00142737	0.0362881	1.13055	0.029104	0.217702	-0.230255	0.651008	0.816206	1.77264	0.000341158	0.00195289	38.8739	21.9877	86.5414	82.6584	55.9465	161.786	48.018	96.6262	55.8825	127.648	267.304	267.65	0	0	1	0	0	0	0	0
chr17	50071731	50071930	intron (NM_181397, intron 4 of 9)	118667	Rftn1	0.587732	0.259559	0.731673	1.66232	0.00131036	0.0341232	1.20184	0.0191366	0.171009	-1.26371	0.0148387	0.0593089	-0.601614	0.234198	0.41587	36.6312	27.0618	50.169	49.907	54.9293	168.194	84.9015	72.5608	53.1565	32.8791	39.6007	58.8242	0	0	1	0	0	0	0	0
chr16	94241232	94241431	intron (NM_139145, intron 4 of 9)	46525	Hlcs	1.42565	0.00172345	0.0380548	1.65876	0.000289111	0.0120239	1.60206	0.00036678	0.0127283	-0.617087	0.166254	0.359749	0.175629	0.678286	0.810461	24.67	30.4445	59.5756	98.2544	72.2219	112.129	84.2056	91.1568	69.5123	46.4175	111.377	90.3371	0	0	1	0	1	0	0	0
chr17	35219779	35219978	TTS (NM_010909)	-14527	Lta	1.41066	0.0076367	0.101294	1.65745	0.00185233	0.0437033	0.881291	0.0943671	0.414646	0.246801	0.62241	0.796786	2.33177	1.25726e-06	1.37796e-05	18.6894	11.8395	41.0758	51.4666	47.8088	62.472	27.8365	33.9103	42.2526	90.901	108.902	226.473	0	0	1	0	0	0	0	0
chr8	124242308	124242507	intron (NM_139272, intron 1 of 15)	11013	Galnt2	1.67725	3.8829e-05	0.00251564	1.6566	5.13815e-05	0.00337884	1.45102	0.000358435	0.0124926	-1.537	0.000195734	0.00176252	-0.689677	0.0863409	0.204692	114.379	67.6544	286.277	333.753	228.872	382.841	281.845	244.3	74.9643	127.648	113.852	200.002	1	0	1	0	0	0	0	0
chr10	71347222	71347421	promoter-TSS (NM_001347191)	-442	Ipmk	1.47984	9.33347e-05	0.00488482	1.65534	1.32046e-05	0.00128325	1.66537	9.70675e-06	0.000835508	0.256388	0.487624	0.698332	-0.179638	0.624158	0.772567	93.4469	71.0371	243.633	237.058	280.75	264.304	263.751	285.138	447.06	205.011	215.329	264.709	0	0	1	0	1	0	0	0
chr4	135313858	135314057	Intergenic	39257	Srrm1	1.29767	0.0138477	0.148185	1.65488	0.00174458	0.0419832	1.22891	0.0188728	0.169698	0.31277	0.537953	0.736576	1.39824	0.00486893	0.0198589	32.1457	16.9136	60.2027	74.8605	49.8433	126.546	54.9772	72.1962	66.7864	154.725	128.702	223.532	0	0	1	0	0	0	0	0
chr15	36562904	36563103	Intergenic	-7431	Snx31	0.512061	0.334885	0.800993	1.6544	0.00166777	0.0407038	1.90667	0.000243554	0.00945568	-2.31652	3.16059e-05	0.000395809	-2.31473	1.24035e-05	0.000103888	23.1748	40.5926	42.0165	49.907	78.3251	134.555	104.387	149.132	9.54091	29.011	12.3752	29.4121	0	0	1	0	1	0	0	1
chr19	18602969	18603168	intron (NM_017375, intron 2 of 9)	28745	Ostf1	1.55226	0.000768135	0.0218698	1.65138	0.000380089	0.0145369	1.64795	0.0003135	0.0114134	0.791696	0.0709899	0.197055	1.06995	0.0123303	0.0435609	24.67	33.8272	85.6008	95.1352	67.1358	128.148	91.8606	101.002	218.078	123.78	146.027	266.389	0	0	1	0	1	0	0	0
chr14	31197905	31198104	intron (NM_001347583, intron 3 of 13)	8822	Nisch	1.20651	0.0165973	0.165994	1.65018	0.00110412	0.0306924	1.44744	0.00344493	0.0581194	1.06161	0.0213294	0.0784644	1.72661	9.84331e-05	0.000654625	8.22332	25.3704	35.1183	42.109	46.7916	59.2683	46.6262	44.4845	130.847	96.7032	131.177	184.036	0	0	1	0	0	0	0	0
chr2	28517417	28517616	intron (NM_001145834, intron 1 of 17)	4349	Ralgds	1.22863	0.0175644	0.172292	1.64741	0.00146326	0.0370248	1.1146	0.0305602	0.223458	0.399666	0.430307	0.65172	1.69743	0.000713123	0.00374852	73.2623	28.7531	159.286	99.814	79.3423	278.721	91.8606	147.674	264.419	212.747	297.005	536.14	0	0	1	0	0	0	0	0
chr10	98786223	98786422	Intergenic	-128830	Atp2b1	1.97319	3.38297e-05	0.00227111	1.64367	0.000676375	0.0217061	2.0398	1.53691e-05	0.00120576	1.75083	7.53877e-05	0.000808957	0.63905	0.138967	0.288492	19.4369	20.2963	94.6939	74.8605	70.1874	64.0738	64.72	113.764	327.117	148.923	126.227	156.724	1	0	1	0	1	0	1	0
chr6	108535384	108535583	intron (NM_010585, intron 60 of 61)	45740	Mir7661	1.2973	0.00562221	0.0830784	1.64328	0.000472492	0.0167958	2.2175	1.53173e-06	0.000203246	0.199336	0.657581	0.820669	-0.624936	0.15564	0.31327	38.8739	18.605	80.2703	74.8605	97.6521	102.518	116.913	185.231	154.018	75.4285	79.2013	110.505	0	0	1	0	1	0	0	0
chr14	27249204	27249403	intron (NM_027871, intron 1 of 10)	11293	Arhgef3	1.10556	0.0135945	0.146423	1.64293	0.000245064	0.0106708	1.51073	0.000655687	0.0189178	-0.191778	0.660413	0.822671	0.791794	0.0625607	0.160415	62.7963	27.0618	90.3041	120.089	95.6177	214.647	141.966	137.829	130.847	137.319	212.854	280.255	0	0	1	0	0	0	0	0
chr19	34877972	34878171	promoter-TSS (NM_023792)	-154	Pank1	1.36686	0.00065758	0.0197364	1.63555	4.89059e-05	0.00328782	1.45938	0.000244002	0.00945568	-0.659028	0.0956211	0.244076	0.0125415	0.973856	0.986969	50.8351	49.0494	128.872	140.363	117.996	209.842	154.493	132.724	96.7721	106.374	111.377	172.691	0	0	1	0	0	0	0	0
chr9	96741063	96741262	intron (NR_015511, intron 2 of 3)	-9487	Zbtb38	1.26512	0.017005	0.168585	1.63379	0.00215581	0.0483927	1.61936	0.00191096	0.0393746	-0.447106	0.384696	0.610393	-0.942697	0.0619564	0.15925	18.6894	13.5309	37.9403	48.3474	46.7916	65.6757	56.369	53.9648	50.4305	29.011	37.1256	21.4288	0	0	1	0	1	0	0	0
chr13	99503618	99503817	intron (NM_008634, intron 2 of 6)	12885	Map1b	1.76552	0.000550126	0.0175727	1.63323	0.00160847	0.0396378	1.57142	0.00195256	0.0399631	0.56665	0.241323	0.459631	0.244132	0.605873	0.758357	17.1942	16.9136	63.6519	63.9433	64.0842	51.259	74.4628	37.192	115.854	58.0219	64.3511	67.6478	1	0	1	0	0	0	0	0
chr1	171648917	171649116	promoter-TSS (NM_001347184)	-17	Slamf7	0.842361	0.104279	0.484433	1.63277	0.00156357	0.0388092	1.44865	0.00429389	0.0674403	0.344517	0.479398	0.691565	0.779141	0.0987635	0.226135	23.9224	11.8395	47.0334	20.2747	61.0326	65.6757	46.6262	63.4451	98.1351	63.8241	99.0016	96.6397	0	0	1	0	0	0	0	0
chr12	71030406	71030605	intron (NM_001081195, intron 5 of 23)	14538	Arid4a	1.00271	0.0202523	0.188456	1.63216	0.000154941	0.00748897	1.61481	0.000160501	0.00707172	-1.02038	0.0175944	0.0675119	-0.581037	0.166854	0.328878	86.7187	47.3581	139.846	143.483	183.098	264.304	188.593	251.228	147.203	63.8241	118.802	167.229	0	0	1	0	1	0	0	0
chr18	66458450	66458649	promoter-TSS (NM_021451)	-55	Pmaip1	1.1867	0.019042	0.181498	1.63155	0.0012733	0.0335019	1.45087	0.0039372	0.0636635	-0.238356	0.632595	0.80425	-0.763892	0.125413	0.268674	44.1069	67.6544	152.388	112.291	153.599	216.249	155.189	167.728	254.879	52.2197	84.1514	98.7406	0	0	1	0	0	0	0	0
chr18	82535270	82535469	intron (NM_001025245, intron 3 of 3)	-19094	Mbp	1.12643	0.0311883	0.248035	1.63131	0.00182334	0.043295	1.60374	0.00186438	0.0388027	-0.113157	0.822658	0.916761	0.00463043	0.992498	0.996633	25.4175	20.2963	47.9741	60.8241	70.1874	86.4996	61.2404	91.1568	72.2383	71.5604	32.1755	113.447	0	0	1	0	1	0	0	0
chr2	152904107	152904306	Intergenic	-7146	Mylk2	1.03467	0.0369641	0.272981	1.63127	0.000997035	0.028692	1.27083	0.00956592	0.112353	-0.48708	0.315007	0.541937	0.771575	0.0996891	0.227623	24.67	38.9013	64.279	70.1817	52.8949	156.981	73.7668	85.3227	84.5052	59.956	113.852	163.027	0	0	1	0	0	0	0	0
chr16	14088419	14088618	intron (NM_144518, intron 2 of 5)	70756	Marf1	1.01901	0.0297398	0.240927	1.62737	0.000513058	0.0178295	1.40006	0.00262772	0.048904	-1.46884	0.0018654	0.0111892	-1.39233	0.00287351	0.0126666	71.7672	55.8149	109.431	163.757	123.082	301.147	148.23	208.567	98.1351	44.4835	56.9259	70.589	0	0	1	0	0	0	0	0
chr12	86834536	86834735	Intergenic	50179	Irf2bpl	0.889185	0.0610611	0.363098	1.6227	0.000612923	0.0202826	0.895431	0.0574508	0.319405	-0.622309	0.183216	0.384524	0.620148	0.177082	0.342441	70.272	28.7531	107.55	87.3372	96.6349	240.277	89.0769	107.565	111.765	100.571	123.752	182.355	0	0	1	0	0	0	0	0
chr14	67234465	67234664	intron (NM_010095, intron 1 of 16)	1272	Ebf2	0.836733	0.0858763	0.437616	1.62199	0.000826492	0.0251506	1.66727	0.00046018	0.014713	-0.177699	0.702753	0.847382	-0.515402	0.25762	0.44354	24.67	21.9877	54.8723	29.6323	78.3251	76.8886	84.9015	75.4778	88.5942	46.4175	56.9259	53.7821	0	0	1	0	1	0	0	0
chr19	8989838	8990037	intron (NR_104460, intron 1 of 6)	653	Ahnak	1.09617	0.0376368	0.27609	1.62185	0.00211228	0.0477787	0.542412	0.302144	0.702924	-1.55157	0.00398459	0.0207235	0.487247	0.338889	0.53019	20.9321	27.0618	47.347	60.8241	48.826	110.527	36.1875	35.0042	17.7188	32.8791	39.6007	59.6645	0	0	1	0	0	0	0	0
chr19	5704280	5704479	promoter-TSS (NM_010609)	-92	Kcnk7	1.6218	0.00195175	0.0414845	1.62092	0.00211538	0.0478263	0.986878	0.0590645	0.323679	0.0203075	0.968163	0.986959	1.89643	0.00012214	0.000791313	24.67	23.679	62.3976	102.933	47.8088	116.935	55.6731	46.6723	43.6156	123.78	170.778	237.818	1	0	1	0	0	0	0	0
chr12	102371038	102371237	intron (NM_177620, intron 6 of 9)	68676	Lgmn	1.37954	0.000516609	0.0169299	1.61994	4.68971e-05	0.0031931	1.28157	0.00121509	0.0295062	-2.80279	2.27996e-11	3.25143e-09	-2.18028	8.17758e-08	1.23064e-06	147.272	103.173	358.081	321.276	283.801	527.007	334.734	299.359	68.1494	36.7472	47.0258	79.4126	0	0	1	0	0	0	0	1
chr4	135203317	135203516	Intergenic	69344	Clic4	1.14104	0.0132757	0.144287	1.61964	0.000447037	0.0161288	1.26214	0.00562831	0.0799316	0.313728	0.477274	0.690153	2.10744	8.08644e-07	9.30268e-06	42.6118	20.2963	81.8381	68.6221	72.2219	144.166	87.6851	78.0302	91.3201	179.868	344.031	413.45	0	0	1	0	0	0	0	0
chr10	22299474	22299673	intron (NM_009018, intron 5 of 5)	-7147	C920009B18Rik	1.3968	0.000874172	0.0237216	1.61813	0.000124567	0.00645634	1.97846	1.82709e-06	0.000231153	-1.33801	0.00167806	0.0102729	-1.33713	0.00099462	0.00501965	51.5827	30.4445	105.355	127.887	112.91	160.185	148.23	202.733	54.5195	48.3516	54.4509	76.4714	0	0	1	0	1	0	0	0
chr15	58649936	58650135	Intergenic	173392	Tmem65	0.880767	0.059885	0.359168	1.61499	0.000539526	0.0185781	1.48122	0.0013019	0.0309898	-1.33556	0.00457697	0.0231475	-0.678947	0.13115	0.277157	28.4078	42.284	54.8723	79.5393	75.2735	152.175	98.1238	106.106	35.4377	50.2857	54.4509	68.4881	0	0	1	0	0	0	0	0
chr5	24776836	24777035	Intergenic	-19092	Crygn	0.682814	0.152865	0.582391	1.61023	0.00069383	0.0220898	1.43346	0.00223739	0.043858	-0.145282	0.752351	0.876979	0.508199	0.256945	0.442809	37.3787	30.4445	57.3807	56.1454	73.2391	152.175	68.1995	127.255	122.669	77.3626	118.802	162.607	0	0	1	0	0	0	0	0
chr7	101466623	101466822	intron (NM_001243757, intron 2 of 30)	-8654	Mir139	0.485998	0.316788	0.786577	1.60949	0.000873382	0.0261483	1.06023	0.0278501	0.21241	-0.941068	0.0509512	0.153219	0.894621	0.059565	0.154562	135.311	54.1235	155.524	118.529	158.685	470.942	160.756	258.156	133.573	181.802	314.33	489.081	0	0	1	0	0	0	0	0
chr17	80174213	80174412	intron (NM_176963, intron 4 of 6)	32993	Srsf7	1.31402	0.00237291	0.0470502	1.60925	0.000209821	0.00941694	1.49419	0.000479706	0.0151245	-0.554221	0.191623	0.395707	-0.67275	0.106326	0.238522	42.6118	32.1358	90.9312	107.612	105.79	139.361	109.258	115.222	107.676	54.1538	56.9259	78.1521	0	0	1	0	0	0	0	0
chr1	138584759	138584958	intron (NM_001311148, intron 1 of 7)	34899	Nek7	0.91287	0.0819613	0.426734	1.60829	0.00212912	0.0480919	1.70224	0.000926953	0.0244158	-2.35697	3.80315e-05	0.000461199	-1.54815	0.00244912	0.0110278	18.6894	23.679	32.9234	51.4666	51.8777	86.4996	72.375	74.0193	8.17792	15.4725	19.8003	25.6305	0	0	1	0	1	0	0	1
chr2	29624901	29625100	intron (NM_001039087, intron 1 of 25)	5280	Rapgef1	2.17615	1.95297e-05	0.00151834	1.60785	0.0019878	0.0459108	1.15017	0.0245066	0.198199	1.14275	0.0169215	0.0655614	2.75946	2.18009e-09	4.89221e-08	17.1942	13.5309	79.9568	79.5393	24.413	83.296	38.9712	36.4627	96.7721	146.989	235.129	323.953	1	0	1	0	0	0	0	0
chr11	43385123	43385322	Intergenic	-10761	Mir146	1.72969	1.56944e-05	0.00128221	1.60594	7.19451e-05	0.00435666	1.70157	1.87758e-05	0.00141433	-0.104624	0.788181	0.897305	0.211987	0.573139	0.7336	46.3496	35.5186	160.227	127.887	109.859	156.981	141.966	142.205	149.929	94.7691	138.602	188.237	1	0	1	0	1	0	0	0
chr5	110808040	110808239	intron (NM_001347394, intron 3 of 27)	1942	Ulk1	1.55905	0.00113566	0.0285555	1.60406	0.000851786	0.0256772	1.53935	0.0012493	0.0300643	-0.566703	0.232643	0.449349	-0.327838	0.483097	0.661965	75.5051	25.3704	185.625	140.363	119.013	221.055	115.522	206.379	122.669	100.571	96.5266	153.783	0	0	1	0	0	0	0	0
chr11	117965678	117965877	TTS (NM_007707)	3589	Socs3	1.82186	0.000370322	0.0135743	1.60235	0.00185375	0.0437156	1.59967	0.00171475	0.0367842	-0.539117	0.288236	0.513378	0.637924	0.19649	0.368185	62.7963	15.2222	142.354	173.115	74.2563	195.425	116.913	149.862	72.2383	108.308	173.253	250.843	1	0	1	0	1	0	0	0
chr12	103532038	103532237	promoter-TSS (NM_028980)	-428	Ppp4r4	1.47832	0.000562072	0.0178244	1.60199	0.000200748	0.00912013	1.54546	0.000280679	0.0105254	0.222128	0.592802	0.775842	-0.0518139	0.899473	0.945262	41.8642	49.0494	154.27	107.612	149.53	139.361	147.534	130.172	234.434	102.505	108.902	154.624	0	0	1	0	0	0	0	0
chr2	128413055	128413254	intron (NR_028591, intron 1 of 1)	16197	Gm14005	1.47157	0.000748472	0.0214951	1.60078	0.000264222	0.0112807	1.22265	0.00487525	0.0729577	-0.565801	0.188887	0.392133	0.28	0.50374	0.679538	41.8642	45.6667	127.931	126.327	116.979	163.388	112.042	100.637	109.039	75.4285	74.2512	177.313	0	0	1	0	0	0	0	0
chr14	54225179	54225378	Intergenic	28651	Dad1	1.4209	0.00113305	0.0285198	1.59727	0.000269865	0.0114709	0.817059	0.0607408	0.328363	-0.501088	0.243695	0.462796	1.60117	0.000117413	0.000765629	42.6118	47.3581	120.092	132.565	82.3939	206.638	87.6851	75.4778	80.4162	119.912	287.105	232.776	0	0	1	0	0	0	0	0
chr4	129035222	129035421	Intergenic	-22950	Rnf19b	1.34852	0.00314316	0.0569329	1.59594	0.00049971	0.0174544	1.4349	0.00152931	0.0342995	-0.744098	0.0998731	0.251743	0.358741	0.408107	0.596198	47.0972	25.3704	96.2617	104.493	78.3251	163.388	104.387	108.659	51.7935	88.967	121.277	152.943	0	0	1	0	0	0	0	0
chr1	151685149	151685348	intron (NM_022018, intron 5 of 13)	-70126	Edem3	1.59485	0.00147521	0.034203	1.59545	0.00158682	0.0392649	2.12543	1.88026e-05	0.00141433	-0.0827483	0.865684	0.938117	-1.43854	0.00313016	0.0136198	26.9127	30.4445	90.9312	95.1352	103.755	81.6941	125.264	148.039	132.21	40.6153	29.7005	60.925	1	0	1	0	1	0	0	0
chr8	94703406	94703605	Intergenic	-7263	Pllp	0.685859	0.189018	0.639977	1.59528	0.00208036	0.0473231	0.564938	0.272506	0.673721	-0.646392	0.200861	0.408389	1.31483	0.00610178	0.0240652	20.9321	11.8395	27.9065	29.6323	46.7916	65.6757	22.9652	29.1702	38.1636	30.945	66.8261	70.1688	0	0	1	0	0	0	0	0
chr15	84856063	84856262	promoter-TSS (NM_001081166)	-33	Phf21b	1.39821	0.00322724	0.0579149	1.59504	0.000859116	0.0258335	1.48971	0.00149114	0.0337287	-0.44759	0.333369	0.560586	-0.557033	0.215059	0.392068	16.4466	28.7531	50.4825	73.3009	74.2563	65.6757	59.8486	69.6438	54.5195	46.4175	42.0757	44.1181	0	0	1	0	0	0	0	0
chr8	109750762	109750961	Intergenic	-13122	Atxn1l	1.40021	0.00283035	0.0530644	1.59331	0.000736304	0.0230763	1.86165	5.76311e-05	0.00337538	0.91762	0.0386985	0.124522	0.559225	0.196453	0.368131	26.1651	27.0618	52.0503	101.374	91.5488	80.0923	87.6851	120.692	226.256	106.374	150.977	161.766	0	0	1	0	1	0	0	0
chr5	115132485	115132684	intron (NM_175352, intron 1 of 4)	2391	Unc119b	1.63564	0.00042097	0.0149643	1.58953	0.000663837	0.0214685	1.51819	0.000999872	0.025787	-1.28144	0.00640938	0.0302976	-0.354038	0.429783	0.615881	41.1166	37.2099	100.965	162.198	73.2391	181.009	124.569	114.493	39.5266	59.956	81.6763	101.262	1	0	1	0	0	0	0	0
chr18	23811047	23811246	intron (NM_153058, intron 1 of 6)	7176	Mapre2	1.40373	0.00638227	0.0896909	1.58948	0.0021746	0.0486188	1.5642	0.00209851	0.0420391	0.0476536	0.923175	0.966156	-0.454372	0.350056	0.541317	21.6797	15.2222	44.2114	65.5029	64.0842	59.2683	48.714	71.8315	85.8682	40.6153	37.1256	47.8997	0	0	1	0	0	0	0	0
chr2	109917465	109917664	promoter-TSS (NM_172671)	-83	Lgr4	0.620467	0.167962	0.606862	1.589	0.000378106	0.0144877	1.84929	2.71039e-05	0.00188708	0.67766	0.113811	0.276201	0.137657	0.744329	0.852476	46.3496	37.2099	87.1686	42.109	160.719	107.324	151.709	172.833	284.864	152.791	212.854	150.002	0	0	1	0	1	0	0	0
chr3	54709053	54709252	exon (NM_019995, exon 11 of 20)	16047	Supt20	1.3222	0.00299146	0.0551152	1.58881	0.00039773	0.0149543	1.93333	9.75848e-06	0.000838464	1.47666	0.00032564	0.00268225	0.600158	0.133423	0.280205	22.4272	25.3704	68.0416	56.1454	75.2735	76.8886	95.3402	99.5432	298.494	139.253	148.502	151.682	0	0	1	0	1	0	0	0
chr8	126856019	126856218	Intergenic	89803	Tomm20	1.76714	1.30836e-06	0.00019525	1.58783	1.69219e-05	0.00152747	1.60772	9.51543e-06	0.000821977	-0.624369	0.0842551	0.223012	0.285496	0.40674	0.594905	57.5633	47.3581	201.616	173.115	158.685	172.999	144.75	190.335	125.395	85.0988	212.854	200.002	1	0	1	0	1	0	0	0
chr5	3355940	3356139	intron (NM_009873, intron 2 of 7)	12146	Cdk6	1.44495	0.00474672	0.0747339	1.58746	0.00213554	0.0481492	1.75402	0.000500259	0.0156337	2.51125	7.24013e-08	2.55669e-06	2.08406	3.9539e-06	3.76801e-05	8.9709	23.679	42.9572	48.3474	50.8605	49.6572	46.6262	66.7267	432.067	191.472	195.528	317.651	0	0	1	0	1	0	1	0
chr2	102874025	102874224	intron (NM_001039150, intron 1 of 13)	27541	Cd44	1.49566	0.000321357	0.0122258	1.5857	0.000151893	0.00738803	1.8822	4.75229e-06	0.000478225	-1.74071	5.99231e-05	0.000670166	-1.7384	2.24377e-05	0.000176147	40.369	43.9754	124.168	123.208	134.272	129.749	133.615	191.794	46.3416	27.0769	59.401	38.2357	0	0	1	0	1	0	0	1

## Sheet: 803 M28 nDHSs
Annotation						Deseq 2 Fold changeanalysis															Read counts												Peak Groups
						M7/Naïve			M28/Naïve			M56/Naïve			M28Ag/M28			M56Ag/M56			Naïve		M7		M28		M56		M28Ag		M56Ag		M7		M28		M56		M28Ag
Chr	Start	End	Annotation	Distance to TSS	Closest gene	log2 FC	P-value	P-adj	log2 FC	P-value	P-adj	log2 FC	P-value	P-adj	log2 FC	P-value	P-adj	log2 FC	P-value	P-adj	N_1	N_2	M7_1	M7_2	M28_1	M28_2	M56_1	M56_2	M28Ag_1	M28Ag_2	M56Ag_1	M56Ag_2	840 M7 mDHSs	1193 M7 nDHSs	984 M28 mDHSs	803 M28 nDHSs	1010 M56 mDHSs	957 M56 nDHSs	6703 iDHSs	935 dDHSs
chr17	21356221	21356420	Intergenic	-27428	Zfp677	-4.97573	3.82374e-08	1.13162e-05	-5.84717	1.81519e-09	8.83794e-07	-5.63924	7.10963e-10	4.28373e-07	0.805852	0.444979	0.664176	0.548321	0.584421	0.741967	31.3981	109.938	1.56778	0	0	0	0.695914	0.364627	0	1.93406	2.47504	0.420173	0	1	0	1	0	1	0	0
chr3	121343296	121343495	intron (NM_024178, intron 3 of 3)	51578	Alg14	-4.49364	5.17494e-11	4.37618e-08	-5.43797	2.13341e-12	2.77931e-09	-5.09575	1.01042e-13	1.80387e-10	0.0694614	0.938447	0.973298	0.684289	0.361609	0.552254	220.535	137	4.70334	7.79797	4.06884	0	2.08774	4.74015	2.72597	1.93406	14.8502	2.10086	0	1	0	1	0	1	0	0
chr6	103564902	103565101	intron (NM_007697, intron 2 of 26)	54125	Chl1	-4.30003	4.45918e-11	3.90803e-08	-4.94053	1.16598e-11	1.27733e-08	-6.15225	1.15701e-17	6.9713e-14	0.339312	0.683582	0.836011	-0.492053	0.581282	0.739463	177.923	140.383	8.15246	3.11919	4.06884	3.20369	2.08774	0.729254	2.72597	7.73626	2.47504	0	0	1	0	1	0	1	0	0
chr7	99954240	99954439	intron (NM_175388, intron 2 of 5)	26119	Rnf169	-4.50887	3.71749e-06	0.000435853	-4.74739	2.0794e-06	0.000305756	-4.61468	1.71618e-06	0.000220596	1.60808	0.124112	0.293819	1.07655	0.289299	0.479203	46.3496	20.2963	0.627112	0	0	0	0	0.729254	1.36299	3.86813	2.47504	1.26052	0	1	0	1	0	1	0	0
chr14	18507717	18507916	Intergenic	-175972	Ube2e1	-4.24395	1.04719e-09	5.76545e-07	-4.62753	1.21615e-09	6.73806e-07	-4.40707	9.56478e-11	7.43615e-08	0.673157	0.427409	0.648922	-0.40989	0.602976	0.756143	100.923	121.778	4.07623	4.67878	5.08605	0	3.47957	4.0109	8.17792	1.93406	0	3.36138	0	1	0	1	0	1	0	0
chr14	53804123	53804322	Intergenic	449707	Dad1	-3.50353	0.000204847	0.00871494	-4.60108	3.74127e-06	0.000480898	-2.53402	0.00553132	0.0790222	0.717832	0.494608	0.703672	-0.555535	0.561871	0.724891	51.5827	28.7531	2.822	0	0	0	1.39183	7.65717	0	1.93406	0	4.20173	0	1	0	1	0	0	0	0
chr4	140601239	140601438	intron (NM_001290803, intron 4 of 28)	47418	Arhgef10l	-2.87087	1.50445e-06	0.000218426	-4.57977	2.04106e-10	1.38568e-07	-3.61729	1.63717e-09	8.22032e-07	1.97242	0.00985135	0.0427874	0.1006	0.880216	0.934953	97.9323	99.7902	10.0338	14.0363	2.03442	3.20369	5.56731	7.29254	8.17792	21.2747	7.42512	6.72276	0	1	0	1	0	1	0	0
chr15	49671324	49671523	Intergenic	-879434	Csmd3	-3.3033	0.000111067	0.00553026	-4.4956	1.1676e-06	0.0001924	-2.75518	0.00091538	0.0242302	2.04594	0.0325551	0.108807	0.066269	0.939082	0.96738	30.6506	87.9507	5.95756	0	1.01721	0	6.26322	5.83403	14.9929	0	9.90016	4.20173	0	1	0	1	0	1	0	0
chr13	15850733	15850932	Intergenic	43589	A530046M15Rik	-4.74122	5.07503e-10	3.20382e-07	-4.41108	2.71282e-08	9.24381e-06	-3.80222	7.82236e-08	1.92034e-05	0.675015	0.43954	0.659353	-1.84658	0.032543	0.0962319	98.6799	91.3334	2.50845	1.55959	5.08605	0	7.65505	2.91702	8.17792	1.93406	0	0.840345	0	1	0	1	0	1	0	0
chr13	104042841	104043040	intron (NM_029447, intron 9 of 12)	66674	Nln	-2.37998	0.0108915	0.12724	-4.33998	1.40336e-05	0.00133216	-3.17236	0.000709352	0.0200658	1.94144	0.0594064	0.171982	-0.688688	0.490056	0.667977	28.4078	38.9013	6.27112	1.55959	0	0	3.47957	0.729254	1.36299	7.73626	2.47504	0	0	0	0	1	0	1	0	0
chr14	53795249	53795448	Intergenic	458581	Dad1	-3.45128	1.13078e-06	0.000173585	-4.33692	2.95979e-08	9.76356e-06	-3.42186	7.62121e-07	0.000117351	0.104009	0.906685	0.957876	-1.7262	0.0360289	0.104279	92.6993	98.0989	3.13556	12.4767	4.06884	1.60185	9.74279	4.37552	2.72597	3.86813	0	1.68069	0	1	0	1	0	1	0	0
chr7	110354048	110354247	intron (NM_177324, intron 26 of 40)	132444	Swap70	-3.47223	1.40343e-05	0.0011806	-4.32351	7.02865e-07	0.00012562	-5.13627	1.14194e-09	6.08513e-07	0.581647	0.541845	0.739356	0.207418	0.826767	0.903793	38.8739	96.4075	4.07623	4.67878	2.03442	1.60185	0	1.45851	1.36299	5.80219	2.47504	0.420173	0	1	0	1	0	1	0	0
chr9	25219965	25220164	Intergenic	-32375	2007-09-01	-3.0299	0.00210299	0.0434125	-4.32177	2.29002e-05	0.00190683	-3.34679	0.000635799	0.0185127	1.14696	0.276827	0.500624	-0.757247	0.461951	0.644336	20.9321	38.9013	3.13556	0	0	0	0	2.55239	1.36299	1.93406	0	0.420173	0	1	0	1	0	1	0	0
chr9	118890264	118890463	intron (NM_001113514, intron 13 of 13)	-36173	Ctdspl	-2.31296	0.00116569	0.0290948	-4.31731	2.63369e-07	5.87727e-05	-3.37654	3.05717e-06	0.000348372	1.83932	0.0382816	0.123444	0.183357	0.816562	0.897376	46.3496	62.5803	10.9745	6.23837	2.03442	0	4.8714	2.91702	8.17792	7.73626	7.42512	2.94121	0	1	0	1	0	1	0	0
chr8	80393248	80393447	Intergenic	-100698	Gypa	-4.10704	1.58019e-06	0.000227368	-4.28501	1.85774e-06	0.000280711	-3.73195	6.27505e-06	0.00058961	0.672849	0.487416	0.698138	-1.95341	0.0408051	0.115241	53.0778	77.8026	0.940668	4.67878	3.05163	0	3.47957	2.91702	0	7.73626	0	0	0	1	0	1	0	1	0	0
chr15	49899925	49900124	Intergenic	989025	Trps1	-4.8556	3.06909e-08	9.24601e-06	-4.28247	1.46824e-06	0.000229036	-4.19944	5.15858e-07	8.72469e-05	0.099954	0.918155	0.963712	-0.820145	0.380424	0.570951	41.8642	120.087	1.88134	0	4.06884	0	4.8714	0.729254	1.36299	3.86813	2.47504	0.420173	0	1	0	1	0	1	0	0
chr6	144357164	144357363	Intergenic	-147695	Sox5	-3.18766	0.000107166	0.00536967	-4.24346	2.77772e-06	0.000388092	-3.97106	1.70734e-06	0.000220045	1.30884	0.174916	0.372655	-1.41263	0.14185	0.292812	29.1554	67.6544	4.07623	3.11919	2.03442	0	1.39183	2.18776	5.45195	3.86813	0	0	0	1	0	1	0	1	0	0
chr14	53960846	53961045	Intergenic	292984	Dad1	-4.60657	2.69005e-06	0.000338447	-4.23645	2.1228e-05	0.00181424	-4.70724	1.2783e-06	0.000175047	0.665209	0.526493	0.72804	0.0831968	0.935953	0.965708	28.4078	43.9754	0.627112	0	0	1.60185	0	0.729254	0	3.86813	0	0.420173	0	1	0	1	0	1	0	0
chr3	14915449	14915648	Intergenic	29122	Car2	-3.23839	3.63632e-05	0.0023945	-4.21787	8.55426e-07	0.000148856	-2.86508	0.000166421	0.0072399	1.20041	0.188453	0.391602	-1.32474	0.119867	0.259958	29.903	103.173	3.13556	7.79797	3.05163	0	9.04688	4.74015	2.72597	9.67032	2.47504	1.68069	0	1	0	1	0	1	0	0
chr10	68081866	68082065	Intergenic	102367	Rtkn2	-3.95416	8.057e-15	2.28449e-11	-4.2022	9.55757e-15	2.55941e-11	-3.83159	7.75661e-15	2.07713e-11	0.185766	0.760905	0.882044	-0.0893626	0.86929	0.928754	268.379	275.692	15.6778	14.0363	13.2237	11.2129	22.9652	10.9388	8.17792	21.2747	22.2754	11.7648	0	1	0	1	0	1	0	0
chr17	52312150	52312349	Intergenic	-290460	Kcnh8	-3.2161	0.000704618	0.0207477	-4.16998	2.49458e-05	0.0020054	-4.15342	1.37739e-05	0.00111773	2.22202	0.0274858	0.0956172	0.53276	0.593731	0.74911	29.1554	65.963	3.44912	1.55959	1.01721	0	0.695914	1.09388	0	19.3406	4.95008	0	0	1	0	1	0	1	0	0
chr6	99646456	99646655	intron (NM_025829, intron 2 of 6)	20216	Eif4e3	-3.45092	6.23951e-07	0.00010758	-4.15184	3.71952e-08	1.13474e-05	-4.37578	4.70109e-10	2.9816e-07	2.10492	0.00702555	0.03265	0.585257	0.446173	0.630483	114.379	81.1853	7.21179	6.23837	5.08605	1.60185	3.47957	2.91702	13.6299	29.011	12.3752	1.68069	0	1	0	1	0	1	0	0
chr6	28322482	28322681	Intergenic	-60980	Zfp800	-3.60864	7.80313e-08	2.01137e-05	-4.10518	8.3526e-09	3.27327e-06	-3.10466	1.81084e-06	0.0002297	-0.203341	0.800036	0.904054	-0.914584	0.199122	0.371443	115.874	186.05	5.33045	15.5959	11.1893	0	16.006	12.3973	2.72597	7.73626	12.3752	3.78155	0	1	0	1	0	1	0	0
chr4	9337489	9337688	intron (NM_028940, intron 2 of 5)	68271	Clvs1	-3.27769	0.000181242	0.00794927	-4.09526	1.23064e-05	0.00121016	-3.10108	0.000286652	0.0106696	2.29554	0.0171506	0.0662308	0.744248	0.403383	0.592169	40.369	38.9013	2.822	1.55959	1.01721	0	0.695914	4.74015	5.45195	13.5384	12.3752	1.68069	0	1	0	1	0	1	0	0
chrX	145433757	145433956	Intergenic	53783	Amot	-3.00148	0.000615356	0.0189046	-4.08587	1.39575e-05	0.00133216	-4.33553	1.37955e-06	0.000185229	0.841308	0.400399	0.624779	-0.193859	0.843833	0.91432	33.6409	59.1976	4.38978	3.11919	2.03442	0	0	1.82314	4.08896	1.93406	2.47504	0	0	1	0	1	0	1	0	0
chr3	82191657	82191856	Intergenic	-45879	Gucy1a1	-2.6985	0.00294135	0.05441	-4.0754	2.40332e-05	0.00197015	-5.06133	1.09354e-07	2.4547e-05	1.40193	0.161536	0.352643	-0.0359402	0.972068	0.986206	35.136	62.5803	2.19489	9.35756	2.03442	0	0.695914	0	0	11.6044	0	0	0	0	0	1	0	1	0	0
chr7	79401621	79401820	intron (NM_145946, intron 3 of 37)	9382	Fanci	-3.2508	8.04504e-06	0.00075592	-4.07174	3.54818e-07	7.50129e-05	-3.4691	1.29849e-06	0.000177189	1.72868	0.0392906	0.126083	-0.77988	0.338226	0.529634	96.4372	45.6667	7.21179	3.11919	2.03442	3.20369	3.47957	5.83403	5.45195	19.3406	2.47504	2.10086	0	1	0	1	0	1	0	0
chr10	41635348	41635547	Intergenic	-28852	Ccdc162	-3.32436	0.000864241	0.023589	-4.05905	7.16269e-05	0.00434661	-2.72747	0.00524303	0.0764211	2.02593	0.0523454	0.15646	-1.44231	0.160542	0.320009	26.9127	21.9877	1.56778	0	0	0	0.695914	3.28164	1.36299	7.73626	0	0	0	1	0	1	0	0	0	0
chr4	6975806	6976005	intron (NM_145711, intron 1 of 8)	14818	Tox	-4.07658	2.99725e-11	2.83834e-08	-4.05288	3.41397e-10	2.19414e-07	-3.27437	1.50627e-08	4.71464e-06	-0.0937988	0.899132	0.954515	-1.19856	0.071822	0.178263	213.806	93.0248	6.89823	7.79797	4.06884	11.2129	13.9183	13.1266	4.08896	9.67032	7.42512	4.20173	0	1	0	1	0	1	0	0
chr15	27796669	27796868	intron (NM_001081302, intron 34 of 56)	-115226	Fam105a	-3.25161	1.78752e-10	1.34628e-07	-4.01924	5.68425e-13	9.78543e-10	-3.49869	3.1198e-12	3.66781e-09	0.787039	0.19423	0.3995	-0.224013	0.686143	0.815535	239.224	182.667	16.932	23.3939	14.2409	6.40738	19.4856	13.4912	21.8078	17.4066	22.2754	9.2438	0	1	0	1	0	1	0	0
chr6	98842956	98843155	Intergenic	185243	Foxp1	-2.68402	0.000268029	0.0106861	-4.00445	9.92543e-07	0.00016846	-2.64477	0.000248903	0.00959043	2.27619	0.00696234	0.0324093	0.920307	0.216312	0.393657	27.6603	98.0989	11.288	1.55959	2.03442	1.60185	7.65505	7.65717	14.9929	17.4066	24.7504	10.0841	0	1	0	1	0	1	0	0
chr9	103489280	103489479	intron (NM_178638, intron 4 of 5)	-9051	Bfsp2	-2.33508	0.0113564	0.131177	-3.99978	4.10451e-05	0.00291808	-3.55869	0.000131717	0.00618813	1.74898	0.0804507	0.215606	1.28124	0.179188	0.345336	35.8836	54.1235	5.64401	6.23837	1.01721	0	0.695914	2.55239	0	13.5384	14.8502	0.420173	0	0	0	1	0	1	0	0
chr6	103512209	103512408	intron (NM_007697, intron 1 of 26)	1432	Chl1	-3.85055	1.27357e-11	1.39519e-08	-3.99665	2.4665e-11	2.42633e-08	-4.82064	8.4282e-17	4.51396e-13	0.876896	0.171444	0.367237	0.121328	0.853837	0.920306	178.67	236.79	12.5422	10.9172	15.2581	4.80554	6.26322	5.10478	27.2597	13.5384	12.3752	3.36138	0	1	0	1	0	1	0	0
chr15	94223719	94223918	Intergenic	-23384	D630010B17Rik	-2.70394	0.00139704	0.0328169	-3.95898	1.51598e-05	0.00139988	-3.0007	0.000344317	0.0121766	2.13098	0.02354	0.0845761	-2.05314	0.0311218	0.0928127	38.8739	55.8149	7.52534	1.55959	1.01721	1.60185	7.65505	0.729254	12.2669	9.67032	0	0	0	1	0	1	0	1	0	0
chr6	28351218	28351417	Intergenic	70407	Gcc1	-4.24723	3.56546e-15	1.43219e-11	-3.95811	1.0291e-12	1.60015e-09	-3.95683	2.19167e-14	5.03062e-11	-1.40018	0.0471546	0.144461	-1.21396	0.0485626	0.132085	248.195	267.235	11.6016	10.9172	11.1893	17.6203	9.04688	18.596	0	9.67032	7.42512	4.6219	0	1	0	1	0	1	0	0
chr17	18003081	18003280	Intergenic	-18553	Fpr-rs4	-4.27445	8.76168e-07	0.000142199	-3.92959	9.69998e-06	0.0010231	-2.56062	0.00166243	0.0359984	0.863895	0.358312	0.585132	-2.58696	0.00544935	0.0218418	53.0778	76.1112	2.50845	0	4.06884	0	11.1346	5.46941	0	11.6044	0	0.420173	0	1	0	1	0	1	0	0
chr9	85105386	85105585	Intergenic	221639	Fam46a	-3.43815	2.20934e-05	0.00165108	-3.91808	6.39187e-06	0.000728371	-3.20124	4.60266e-05	0.00283705	2.23608	0.0124094	0.0515385	-1.50669	0.0966415	0.222568	34.3884	67.6544	2.19489	4.67878	3.05163	0	2.78365	4.74015	12.2669	15.4725	2.47504	0	0	1	0	1	0	1	0	0
chr4	111414831	111415030	promoter-TSS (NM_026279)	-76	Bend5	-3.04083	5.26605e-06	0.000553015	-3.8491	1.32462e-07	3.21997e-05	-4.65872	3.38086e-11	3.01785e-08	1.44603	0.060072	0.173493	0.0275897	0.972725	0.986457	74.0099	109.938	7.8389	10.9172	8.13767	0	2.08774	2.55239	9.54091	21.2747	2.47504	2.10086	0	1	0	1	0	1	0	0
chr14	16164700	16164899	Intergenic	-84515	Ngly1	-3.22757	0.000181736	0.00796368	-3.81132	3.04266e-05	0.00233701	-2.95792	0.000428651	0.0141133	1.44086	0.13143	0.305958	-0.0650903	0.941906	0.969033	31.3981	54.1235	4.38978	0	1.01721	1.60185	4.8714	2.55239	1.36299	11.6044	4.95008	2.52104	0	1	0	1	0	1	0	0
chr9	112214075	112214274	intron (NM_001177619, intron 1 of 10)	3087	Arpp21	-1.65638	0.0467899	0.312204	-3.79892	4.45641e-05	0.00311596	-3.15359	0.000214832	0.0086801	2.1876	0.0225895	0.0819062	-0.348226	0.70788	0.829232	31.3981	30.4445	5.95756	10.9172	0	1.60185	0.695914	3.28164	4.08896	13.5384	2.47504	0.840345	0	0	0	1	0	1	0	0
chr1	128602680	128602879	Intergenic	-10480	Cxcr4	-3.18004	1.74678e-05	0.00139401	-3.78046	1.47801e-06	0.000229816	-3.74697	3.84332e-07	6.93842e-05	0.316546	0.710657	0.851777	-2.35473	0.00897735	0.033472	113.631	72.7285	6.89823	9.35756	2.03442	8.00923	3.47957	6.19866	0	13.5384	0	0	0	1	0	1	0	1	0	0
chr2	52310786	52310985	intron (NM_010889, intron 12 of 156)	19883	4930573O16Rik	-2.14008	0.000734954	0.0212898	-3.7769	2.65982e-07	5.89162e-05	-1.81966	0.00316631	0.0549001	3.19861	1.69775e-05	0.000235821	0.167415	0.794394	0.884521	42.6118	82.8766	15.0507	7.79797	1.01721	4.80554	17.3978	13.8558	38.1636	42.5494	7.42512	24.37	0	1	0	1	0	0	1	0
chr15	94187670	94187869	Intergenic	-59433	D630010B17Rik	-3.77081	1.06302e-06	0.00016529	-3.77641	2.42599e-06	0.000346996	-3.98847	1.61095e-07	3.29031e-05	0.438825	0.611092	0.789194	-0.811494	0.346404	0.537878	40.369	142.074	5.33045	3.11919	4.06884	4.80554	6.95914	1.09388	5.45195	7.73626	0	2.10086	0	1	0	1	0	1	0	0
chr13	34090598	34090797	intron (NR_046184, intron 3 of 4)	-12689	Tubb2a	-2.69773	0.00133485	0.0317898	-3.77149	3.25433e-05	0.00245485	-4.15621	1.64047e-06	0.000213714	2.88315	0.00173523	0.0105528	0.725263	0.435501	0.621065	48.5924	32.1358	7.21179	0	1.01721	1.60185	1.39183	0.729254	12.2669	29.011	4.95008	0.840345	0	1	0	1	0	1	0	0
chr2	84347435	84347634	intron (NM_018782, intron 11 of 15)	77732	Calcrl	-3.42591	4.71016e-07	8.40886e-05	-3.77074	8.01651e-08	2.08871e-05	-2.99137	6.9502e-06	0.000636908	1.03608	0.155029	0.342784	-0.932495	0.190282	0.360138	136.806	252.013	18.1862	7.79797	16.2753	3.20369	22.9652	16.0436	36.8007	9.67032	19.8003	2.52104	0	1	0	1	0	1	0	0
chr6	22374934	22375133	Intergenic	-18952	Fam3c	-3.60845	3.36407e-07	6.4862e-05	-3.75626	5.80827e-07	0.000110281	-4.99382	2.12376e-11	2.04739e-08	0.75998	0.351831	0.578981	0.220712	0.797034	0.885916	53.8254	104.864	5.0169	4.67878	5.08605	3.20369	1.39183	1.45851	6.81494	9.67032	0	2.10086	0	1	0	1	0	1	0	0
chr4	32394951	32395150	Intergenic	-22385	Bach2	-3.03396	2.98035e-05	0.00204642	-3.73248	3.49441e-06	0.000464015	-2.50489	0.000307649	0.0112773	2.77995	0.000715603	0.00511925	1.17241	0.101276	0.230282	46.3496	43.9754	2.822	6.23837	3.05163	0	2.78365	9.4803	19.0818	25.1428	14.8502	17.2271	0	1	0	1	0	1	0	0
chr9	14966874	14967073	Intergenic	-63022	Izumo1r	-3.22113	3.44021e-05	0.00229993	-3.70172	8.72413e-06	0.000936572	-2.21877	0.00271827	0.0500099	1.61297	0.0637096	0.181411	-1.50995	0.0674232	0.169851	27.6603	79.4939	4.38978	3.11919	4.06884	0	10.4387	8.02179	10.9039	9.67032	4.95008	1.26052	0	1	0	1	0	0	0	0
chr6	28382080	28382279	Intergenic	39545	Gcc1	-1.74052	0.0728885	0.398989	-3.6923	0.0002739	0.0116117	-2.7478	0.00478943	0.0721431	2.36017	0.0217026	0.0794372	0.401773	0.687776	0.816717	23.9224	27.0618	6.89823	3.11919	0	0	3.47957	0.364627	2.72597	13.5384	7.42512	0	0	0	0	1	0	0	0	0
chr14	10911577	10911776	intron (NM_001308285, intron 2 of 9)	173123	Fhitos	-3.64437	2.8332e-05	0.00197635	-3.66859	4.31027e-05	0.00304763	-4.05558	2.7532e-06	0.000322111	-0.383016	0.696679	0.843842	-0.126038	0.893093	0.941864	40.369	82.8766	3.76267	1.55959	5.08605	0	0	3.64627	0	3.86813	2.47504	1.26052	0	1	0	1	0	1	0	0
chr5	89174474	89174673	intron (NM_001197147, intron 15 of 25)	283325	Gc	-2.94048	0.000573076	0.0180192	-3.65421	5.68523e-05	0.00365386	-4.15077	1.9958e-06	0.000247305	1.64234	0.0810919	0.216868	0.0204804	0.982921	0.991789	27.6603	57.5062	2.19489	6.23837	3.05163	0	0.695914	1.45851	4.08896	13.5384	2.47504	0.420173	0	1	0	1	0	1	0	0
chr10	122199896	122200095	Intergenic	80298	Gm4489	-2.55132	1.12876e-05	0.000992854	-3.64504	8.15503e-09	3.22204e-06	-3.97856	2.62754e-11	2.48339e-08	3.53445	2.59966e-08	1.0887e-06	2.48405	4.60156e-05	0.000334749	64.2914	204.655	22.576	15.5959	13.2237	1.60185	6.26322	6.56329	164.921	79.2966	42.0757	44.9585	0	1	0	1	0	1	1	0
chr9	115481282	115481481	Intergenic	99562	Mir467h	-3.21316	8.78279e-08	2.21648e-05	-3.62531	3.16077e-08	1.00898e-05	-3.21308	3.61389e-08	1.00113e-05	1.08262	0.125606	0.296148	0.96666	0.117173	0.256062	81.4857	98.0989	7.21179	9.35756	6.10326	4.80554	11.1346	5.46941	14.9929	11.6044	14.8502	18.0674	0	1	0	1	0	1	0	0
chr16	44970847	44971046	intron (NM_027578, intron 4 of 4)	27268	Cd200r3	-2.4621	0.00357925	0.0621719	-3.62513	6.27228e-05	0.00395211	-3.30378	9.99092e-05	0.0050934	0.848419	0.376227	0.602368	0.0612084	0.946164	0.971623	44.8545	42.284	2.19489	10.9172	3.05163	0	4.17548	1.45851	1.36299	7.73626	4.95008	1.68069	0	0	0	1	0	1	0	0
chr15	68959388	68959587	intron (NM_010158, intron 1 of 8)	31067	Khdrbs3	-3.57428	2.10708e-05	0.00160198	-3.6156	3.61548e-05	0.00266881	-4.25247	4.82264e-07	8.27264e-05	0.325134	0.732146	0.864486	-0.230787	0.806596	0.891508	50.0875	50.7408	2.50845	3.11919	2.03442	3.20369	1.39183	1.45851	0	7.73626	2.47504	0.420173	0	1	0	1	0	1	0	0
chr6	128025596	128025795	intron (NM_175414, intron 3 of 8)	117883	Tspan9	-2.6875	0.000745366	0.0214563	-3.61014	1.95644e-05	0.00169612	-4.82657	9.33798e-09	3.2382e-06	-0.0303987	0.973712	0.989497	0.632723	0.488685	0.666637	105.408	33.8272	5.33045	12.4767	4.06884	3.20369	0.695914	1.45851	0	7.73626	4.95008	0.840345	0	1	0	1	0	1	0	0
chr13	19928925	19929124	Intergenic	-104767	Gpr141	-2.74808	0.000336553	0.0126442	-3.60849	1.40673e-05	0.00133216	-3.2972	1.59478e-05	0.00123588	1.74808	0.0429361	0.134757	0.0132634	0.98726	0.994045	25.4175	77.8026	5.33045	6.23837	3.05163	1.60185	3.47957	3.64627	12.2669	11.6044	0	5.04207	0	1	0	1	0	1	0	0
chr6	121063119	121063318	intron (NM_001270475, intron 1 of 31)	-1246	Gm4651	-3.10093	0.000104957	0.00528095	-3.59893	1.40397e-05	0.00133216	-3.26738	3.58719e-05	0.00235251	0.0657699	0.940802	0.974232	-0.681809	0.421626	0.60824	87.4663	111.63	7.21179	9.35756	8.13767	1.60185	10.4387	4.0109	0	11.6044	9.90016	0.420173	0	1	0	1	0	1	0	0
chr6	99658662	99658861	intron (NM_025829, intron 1 of 6)	8010	Eif4e3	-2.1662	0.00630894	0.0889712	-3.59867	3.74501e-05	0.00273097	-4.13593	7.29572e-07	0.000114178	1.4894	0.103391	0.257846	1.56626	0.0745867	0.183589	38.8739	42.284	5.64401	9.35756	3.05163	0	0.695914	1.45851	4.08896	11.6044	9.90016	2.52104	0	0	0	1	0	1	0	0
chr3	15126794	15126993	Intergenic	155692	A930001A20Rik	-3.15763	8.15915e-05	0.00438937	-3.59248	1.65966e-05	0.00150657	-3.23402	4.23499e-05	0.00267193	0.674664	0.442702	0.662243	-2.16725	0.0172509	0.0576248	85.2235	82.8766	9.09312	3.11919	8.13767	0	6.26322	6.19866	0	17.4066	0	0.420173	0	1	0	1	0	1	0	0
chr13	59011619	59011818	intron (NM_001025074, intron 13 of 17)	204021	Ntrk2	-2.32326	0.00860857	0.109892	-3.59111	0.000119337	0.00626472	-2.81572	0.00139218	0.0322161	1.05597	0.276607	0.500392	-0.86333	0.35869	0.549661	36.6312	57.5062	6.89823	6.23837	3.05163	0	4.8714	3.64627	0	11.6044	4.95008	0	0	0	0	1	0	1	0	0
chr3	135515326	135515525	intron (NM_027288, intron 4 of 16)	29814	Manba	-2.45896	0.0051466	0.0787044	-3.58768	9.62974e-05	0.00534761	-3.14361	0.000345236	0.0121913	0.343218	0.723493	0.859343	0.798447	0.376511	0.567303	47.8448	69.3458	8.15246	6.23837	4.06884	0	4.17548	3.64627	2.72597	3.86813	19.8003	0	0	0	0	1	0	1	0	0
chr4	19923339	19923538	promoter-TSS (NM_175406)	-872	Atp6v0d2	-3.24167	1.06013e-06	0.00016529	-3.58343	4.27748e-07	8.69972e-05	-2.47606	9.34883e-05	0.00487697	1.5717	0.033753	0.111796	-0.722927	0.296218	0.486714	68.7769	103.173	5.64401	9.35756	4.06884	6.40738	10.4387	15.3143	28.6227	7.73626	12.3752	4.6219	0	1	0	1	0	1	0	0
chr14	121545572	121545771	intron (NM_001128308, intron 52 of 53)	-40417	Slc15a1	-3.05395	0.00384297	0.0646901	-3.58305	0.000678151	0.0217486	-3.73995	0.000400419	0.0134784	0.951812	0.365769	0.592353	0.82965	0.431517	0.617443	97.9323	108.247	5.33045	0	1.01721	0	0.695914	0	0	11.6044	7.42512	0.420173	0	0	0	1	0	1	0	0
chr13	97309524	97309723	Intergenic	68518	Enc1	-3.10969	0.000323761	0.0122785	-3.57367	8.25496e-05	0.00479983	-3.50776	4.4319e-05	0.00276003	1.25859	0.183946	0.385453	-0.893355	0.347885	0.539185	46.3496	42.284	2.50845	4.67878	1.01721	3.20369	0.695914	3.64627	2.72597	11.6044	2.47504	0	0	1	0	1	0	1	0	0
chr13	28749957	28750156	intron (NR_045053, intron 3 of 8)	-39183	Mir6368	-2.62833	0.000708136	0.0208005	-3.57334	2.16786e-05	0.00183768	-3.92021	8.67854e-07	0.00012941	2.06302	0.0172272	0.0664629	1.12182	0.184608	0.352611	29.903	67.6544	5.64401	6.23837	4.06884	0	2.78365	1.09388	10.9039	19.3406	9.90016	2.52104	0	1	0	1	0	1	0	0
chr15	94220830	94221029	Intergenic	-26273	D630010B17Rik	-3.27723	3.87939e-06	0.000448428	-3.5705	2.16033e-06	0.000315553	-4.13719	8.62885e-09	3.08095e-06	0.484269	0.556119	0.749677	-0.753972	0.372233	0.563216	53.0778	99.7902	5.0169	7.79797	2.03442	8.00923	3.47957	2.55239	8.17792	5.80219	2.47504	0.840345	0	1	0	1	0	1	0	0
chr18	13693884	13694083	intron (NM_145492, intron 7 of 7)	278750	Zfp521	-3.71643	1.71981e-05	0.0013829	-3.56527	5.58053e-05	0.00362036	-4.21981	9.7352e-07	0.000140496	-0.261471	0.786008	0.896016	-0.140376	0.881154	0.935248	47.0972	82.8766	3.76267	1.55959	6.10326	0	1.39183	2.18776	1.36299	3.86813	4.95008	0	0	1	0	1	0	1	0	0
chr10	19117244	19117443	Intergenic	-24406	Gm20139	-2.64662	6.3531e-07	0.000108593	-3.56169	6.08014e-10	3.48899e-07	-2.06321	6.35172e-05	0.00361825	0.529779	0.397099	0.62146	-0.7592	0.168606	0.331302	236.234	87.9507	21.9489	24.9535	10.1721	12.8148	27.8365	43.3906	13.6299	21.2747	19.8003	20.5885	0	1	0	1	0	1	0	0
chr19	41039202	41039401	intron (NM_009345, intron 3 of 11)	10026	Dntt	-2.29486	0.00142139	0.0332846	-3.55561	8.12262e-06	0.000881816	-3.40651	3.22232e-06	0.000360732	0.138896	0.876185	0.943317	0.251188	0.752431	0.857821	38.1263	71.0371	10.0338	7.79797	4.06884	1.60185	2.78365	4.37552	1.36299	5.80219	4.95008	4.20173	0	1	0	1	0	1	0	0
chr5	89123017	89123216	intron (NM_001197147, intron 8 of 25)	235856	Slc4a4	-3.37602	2.64602e-05	0.00188117	-3.54788	1.93922e-05	0.00168422	-4.1832	2.22187e-07	4.28394e-05	0.880377	0.311326	0.538178	-0.738629	0.414822	0.602157	61.3011	104.864	5.95756	4.67878	7.12046	1.60185	2.78365	2.55239	0	21.2747	2.47504	0.420173	0	1	0	1	0	1	0	0
chr10	19194767	19194966	intron (NR_038021, intron 3 of 3)	27628	Gm20139	-1.96616	0.0174845	0.171873	-3.54331	9.90014e-05	0.00547255	-2.7847	0.000804368	0.022105	1.34348	0.160354	0.350905	-0.294874	0.742482	0.851307	29.1554	33.8272	5.33045	7.79797	2.03442	0	4.17548	2.18776	1.36299	9.67032	2.47504	2.10086	0	0	0	1	0	1	0	0
chr1	62639155	62639354	3' UTR (NM_001081050, exon 23 of 23)	-64063	Nrp2	-2.37765	0.00347186	0.0608326	-3.53491	5.61553e-05	0.00362373	-3.59702	1.39735e-05	0.0011269	1.14733	0.213733	0.424932	-1.18329	0.209569	0.385132	50.8351	40.5926	7.21179	6.23837	4.06884	0	0.695914	3.64627	2.72597	11.6044	0	0.420173	0	0	0	1	0	1	0	0
chr18	60991459	60991658	Intergenic	22641	Slc6a7	-3.03993	0.000172679	0.00770691	-3.52855	3.89448e-05	0.00281865	-4.42925	1.24235e-07	2.69746e-05	1.22018	0.175525	0.373588	-0.954971	0.322421	0.513933	40.369	62.5803	3.44912	6.23837	5.08605	0	1.39183	1.09388	4.08896	13.5384	0	0	0	1	0	1	0	1	0	0
chr16	84824989	84825188	3' UTR (NM_023844, exon 10 of 10)	9910	Atp5j	-3.63661	1.27089e-05	0.00109287	-3.52824	3.50118e-05	0.00260037	-2.74869	0.000619915	0.0182118	1.27653	0.147638	0.331491	0.36952	0.656199	0.794838	39.6215	104.864	4.38978	1.55959	5.08605	1.60185	6.26322	8.75105	2.72597	21.2747	22.2754	2.10086	0	1	0	1	0	1	0	0
chr3	148807130	148807329	Intergenic	147406	Adgrl2	-2.82398	4.48366e-06	0.000493428	-3.51069	8.99684e-08	2.28371e-05	-3.61004	5.09395e-09	2.09862e-06	-0.652348	0.392672	0.61695	-1.49165	0.0441307	0.122643	87.4663	170.827	15.3642	15.5959	11.1893	6.40738	9.74279	7.29254	1.36299	9.67032	4.95008	1.26052	0	1	0	1	0	1	0	0
chr18	84911718	84911917	Intergenic	-23208	Fbxo15	-3.21855	4.56835e-06	0.000501603	-3.5067	1.22603e-06	0.00019898	-3.16087	4.82755e-06	0.000481775	-0.0140111	0.985545	0.994291	-1.77488	0.0223524	0.0710799	142.039	182.667	6.89823	21.8343	18.3098	1.60185	11.8305	16.0436	4.08896	17.4066	7.42512	0.840345	0	1	0	1	0	1	0	0
chr7	83148245	83148444	promoter-TSS (NM_177895)	-126	A530021J07Rik	-3.75525	3.02781e-08	9.17902e-06	-3.50195	6.16449e-07	0.000114726	-3.85494	5.61444e-09	2.25523e-06	1.46318	0.0466374	0.143204	0.918771	0.195042	0.366256	44.1069	130.235	4.70334	4.67878	5.08605	6.40738	4.8714	4.0109	23.1708	13.5384	7.42512	10.0841	0	1	0	1	0	1	0	0
chrX	13370423	13370622	Intergenic	89500	Ddx3x	-3.95064	4.66913e-06	0.000509188	-3.49884	6.72238e-05	0.00418106	-2.62222	0.00124546	0.0300019	0.324419	0.731536	0.864024	-0.83791	0.340166	0.531352	35.8836	64.2717	2.50845	0	2.03442	3.20369	7.65505	4.37552	0	7.73626	4.95008	1.68069	0	1	0	1	0	1	0	0
chr5	67930687	67930886	Intergenic	-10883	Gm5108	-2.38753	0.00653353	0.0909937	-3.49444	0.000168147	0.00793829	-3.94384	1.15043e-05	0.000961059	1.15187	0.233172	0.449881	-0.971213	0.326922	0.518626	27.6603	59.1976	6.89823	4.67878	1.01721	3.20369	2.08774	0.729254	0	13.5384	0	0	0	0	0	1	0	1	0	0
chr6	66155007	66155206	Intergenic	-117399	Gm31520	-3.35435	1.60535e-05	0.00130491	-3.48407	1.65895e-05	0.00150657	-4.18501	9.5203e-08	2.26058e-05	0.252059	0.773615	0.889695	-0.715055	0.424967	0.611433	38.1263	108.247	6.27112	3.11919	8.13767	0	2.78365	2.18776	5.45195	5.80219	0	1.26052	0	1	0	1	0	1	0	0
chr10	69168604	69168803	Intergenic	-39849	Rhobtb1	-2.52432	0.00678123	0.0933112	-3.48101	0.000341776	0.0136083	-4.24367	9.02022e-06	0.00078341	0.392024	0.700753	0.846192	-0.515467	0.614312	0.764709	21.6797	57.5062	1.25422	9.35756	3.05163	0	0.695914	0.729254	0	5.80219	0	0	0	0	0	1	0	1	0	0
chr3	131170199	131170398	intron (NM_001276403, intron 3 of 11)	57507	Lef1	-2.29029	0.0031309	0.0567566	-3.48019	4.64224e-05	0.00317549	-3.48978	1.07443e-05	0.00090226	2.11907	0.0161096	0.063229	1.31176	0.114868	0.25225	50.8351	21.9877	4.70334	7.79797	3.05163	0	2.78365	1.45851	12.2669	13.5384	9.90016	4.6219	0	0	0	1	0	1	0	0
chr3	121444126	121444325	intron (NM_028044, intron 1 of 6)	17684	Cnn3	-3.22789	3.15681e-05	0.00215531	-3.47888	2.48395e-05	0.0020054	-3.70395	1.62934e-06	0.000212838	1.51299	0.080347	0.215388	0.630641	0.450494	0.634504	40.369	50.7408	4.38978	1.55959	2.03442	3.20369	1.39183	2.91702	6.81494	13.5384	4.95008	3.36138	0	1	0	1	0	1	0	0
chr17	62781282	62781481	intron (NM_010109, intron 1 of 3)	99936	Efna5	-3.08369	0.000232568	0.00959779	-3.47403	7.9418e-05	0.0046514	-3.83809	5.20756e-06	0.0005071	1.0142	0.274044	0.497405	1.03721	0.242786	0.426222	36.6312	54.1235	3.76267	3.11919	4.06884	0	0.695914	2.55239	8.17792	3.86813	9.90016	1.68069	0	1	0	1	0	1	0	0
chr5	20299931	20300130	intron (NM_001170746, intron 6 of 22)	392512	Magi2	-3.54073	2.74772e-05	0.00194459	-3.45673	7.47016e-05	0.00445639	-4.55656	1.25693e-07	2.71689e-05	0.781502	0.398714	0.623037	-0.818628	0.40368	0.59237	52.3302	47.3581	3.44912	1.55959	4.06884	1.60185	1.39183	0.729254	1.36299	11.6044	0	0	0	1	0	1	0	1	0	0
chr10	83140601	83140800	intron (NM_021439, intron 2 of 2)	155203	Chst11	-3.27202	7.27079e-05	0.00400492	-3.45302	5.81496e-05	0.00372217	-3.15912	8.84216e-05	0.00468543	0.929256	0.304498	0.530925	0.0953019	0.911563	0.952054	46.3496	59.1976	3.76267	3.11919	5.08605	0	3.47957	4.37552	2.72597	11.6044	9.90016	1.26052	0	1	0	1	0	1	0	0
chr18	60973420	60973619	intron (NM_177407, intron 14 of 17)	9965	Camk2a	-2.64101	0.0012857	0.0310489	-3.45212	7.38704e-05	0.00441774	-3.22266	8.24494e-05	0.00443057	0.442529	0.635695	0.806129	0.0815091	0.925682	0.96006	47.0972	50.7408	5.33045	6.23837	2.03442	3.20369	4.8714	2.18776	4.08896	3.86813	9.90016	0.420173	0	1	0	1	0	1	0	0
chr9	116018700	116018899	intron (NM_028638, intron 12 of 14)	109344	Gadl1	-3.09714	6.40892e-06	0.000635643	-3.45131	1.99499e-06	0.000297717	-2.55535	0.000112758	0.00556313	-0.324427	0.693874	0.84228	-2.42499	0.00233978	0.0105968	70.272	103.173	8.15246	7.79797	8.13767	3.20369	12.5264	12.0327	0	9.67032	0	1.68069	0	1	0	1	0	1	0	0
chr18	73648485	73648684	intron (NM_008540, intron 10 of 11)	55157	Smad4	-3.16004	2.23248e-05	0.00166464	-3.44764	8.78705e-06	0.000939262	-2.80048	0.000114585	0.00561313	1.18235	0.142854	0.323683	-0.399798	0.605403	0.757984	133.068	38.9013	9.72023	3.11919	7.12046	3.20369	7.65505	11.3034	17.7188	11.6044	14.8502	2.10086	0	1	0	1	0	1	0	0
chr13	76858141	76858340	intron (NM_030174, intron 15 of 20)	277228	Slf1	-2.91853	0.000706584	0.0207675	-3.44675	0.000119571	0.00626472	-4.17764	1.87793e-06	0.000235729	0.249159	0.793672	0.900741	0.22868	0.807877	0.892289	28.4078	89.6421	3.44912	7.79797	3.05163	3.20369	3.47957	0	4.08896	3.86813	4.95008	0.420173	0	1	0	1	0	1	0	0
chr8	114869282	114869481	intron (NM_019573, intron 8 of 8)	429729	Wwox	-3.63263	1.74996e-06	0.000246641	-3.4434	1.05861e-05	0.00109721	-3.36712	4.7284e-06	0.000477817	0.546371	0.513882	0.71835	-2.52236	0.00506215	0.0205168	96.4372	59.1976	2.50845	7.79797	8.13767	1.60185	2.78365	8.02179	5.45195	11.6044	0	0	0	1	0	1	0	1	0	0
chr16	22526478	22526677	intron (NM_001346673, intron 19 of 23)	5607	Mir8095	-2.61429	7.84412e-06	0.000741377	-3.4418	5.72373e-08	1.61342e-05	-2.6938	2.7107e-06	0.000320171	1.72278	0.00877979	0.0390986	-0.0931998	0.879741	0.934683	99.4275	121.778	18.8134	10.9172	9.15488	6.40738	16.006	13.4912	39.5266	21.2747	24.7504	7.14293	0	1	0	1	0	1	1	0
chr7	130903634	130903833	intron (NM_001346515, intron 8 of 12)	-4535	Mir7061	-1.14301	0.154204	0.584932	-3.4401	0.000131263	0.00666719	-2.59854	0.00146242	0.0333451	0.840261	0.383021	0.608869	-0.575066	0.518337	0.691604	26.9127	33.8272	8.15246	17.1555	1.01721	1.60185	5.56731	1.82314	1.36299	5.80219	2.47504	1.68069	0	0	0	1	0	1	0	0
chr10	99119569	99119768	intron (NM_027740, intron 2 of 11)	11533	Galnt4	-3.85503	5.89486e-07	0.000102951	-3.43987	1.02691e-05	0.00107325	-3.70144	9.13614e-07	0.000134105	0.721233	0.375404	0.601576	-0.540844	0.509642	0.684207	108.398	125.161	5.64401	4.67878	11.1893	3.20369	5.56731	6.56329	0	29.011	7.42512	1.68069	0	1	0	1	0	1	0	0
chr17	74769429	74769628	intron (NM_152817, intron 9 of 19)	51778	Ttc27	-1.69435	0.0459202	0.309075	-3.439	0.000192691	0.008829	-2.91109	0.000704844	0.0199881	1.4768	0.123446	0.292644	0.712288	0.426309	0.612632	26.1651	37.2099	10.0338	4.67878	2.03442	0	3.47957	1.82314	1.36299	11.6044	9.90016	2.10086	0	0	0	1	0	1	0	0
chrX	167330449	167330648	promoter-TSS (NM_001290758)	23	Tlr7	-2.97178	0.000147675	0.00681821	-3.43579	3.67335e-05	0.00269612	-2.49761	0.000962622	0.0250693	2.07765	0.0150614	0.0599893	0.38656	0.624957	0.773109	25.4175	69.3458	6.58468	0	3.05163	1.60185	5.56731	6.92791	14.9929	17.4066	4.95008	10.9245	0	1	0	1	0	1	0	0
chr6	146114609	146114808	intron (NM_010586, intron 54 of 55)	180561	Sspn	-3.01775	0.000507609	0.0168048	-3.42218	0.000172862	0.00810535	-2.32696	0.00549408	0.0788407	1.01553	0.289406	0.514811	-2.49589	0.0088023	0.0329033	36.6312	37.2099	3.76267	1.55959	2.03442	1.60185	8.35096	2.91702	1.36299	9.67032	0	0	0	1	0	1	0	0	0	0
chr6	99643639	99643838	intron (NM_025829, intron 2 of 6)	23033	Eif4e3	-2.70704	2.89342e-05	0.00201253	-3.41429	6.94001e-07	0.00012562	-3.47163	8.7827e-08	2.09576e-05	1.95586	0.00551218	0.0268409	2.38687	0.000287178	0.00167727	151.01	55.8149	16.932	7.79797	5.08605	9.61107	6.95914	7.29254	54.5195	13.5384	66.8261	28.9919	0	1	0	1	0	1	0	0
chr15	68961849	68962048	intron (NM_010158, intron 1 of 8)	33528	Khdrbs3	-3.46774	6.58633e-05	0.00372186	-3.41399	0.000116311	0.00612905	-4.05029	3.00953e-06	0.000344573	1.01428	0.267633	0.489915	1.03094	0.25305	0.438145	74.0099	69.3458	3.13556	4.67878	7.12046	0	2.08774	2.18776	6.81494	13.5384	14.8502	0	0	1	0	1	0	1	0	0
chr4	152238715	152238914	intron (NM_001146057, intron 6 of 8)	-35548	Gpr153	-1.48436	0.0900474	0.449289	-3.41161	0.000288696	0.0120239	-4.05245	9.91754e-06	0.000846098	2.64847	0.00540441	0.0264149	1.47297	0.122631	0.264374	34.3884	30.4445	6.89823	12.4767	2.03442	0	1.39183	0	1.36299	34.8132	4.95008	2.52104	0	0	0	1	0	1	0	0
chr4	7534405	7534604	Intergenic	-26184	8430436N08Rik	-3.32556	2.3458e-06	0.000307612	-3.40625	3.63175e-06	0.000475452	-4.14544	5.59454e-09	2.25523e-06	1.13236	0.143064	0.323998	0.357732	0.6478	0.789234	42.6118	125.161	5.33045	7.79797	9.15488	1.60185	2.08774	4.0109	12.2669	17.4066	4.95008	3.78155	0	1	0	1	0	1	0	0
chr3	81489451	81489650	Intergenic	-312475	A830029E22Rik	-2.68685	0.00289098	0.0538242	-3.38805	0.000297399	0.0122523	-4.11311	7.58444e-06	0.000678266	0.0464118	0.962756	0.984508	-0.244981	0.804301	0.889971	34.3884	64.2717	8.77957	0	2.03442	3.20369	1.39183	1.09388	0	5.80219	2.47504	0	0	0	0	1	0	1	0	0
chr2	104386051	104386250	intron (NM_001033347, intron 1 of 20)	24184	D430041D05Rik	-3.0142	0.000356145	0.0131749	-3.37195	0.000113026	0.00600008	-4.52815	1.78473e-07	3.59947e-05	0.891575	0.326937	0.553954	0.443841	0.63449	0.779997	24.67	106.556	5.95756	4.67878	3.05163	4.80554	0	2.18776	2.72597	15.4725	4.95008	0.420173	0	1	0	1	0	1	0	0
chr9	112100932	112101131	intron (NM_001177618, intron 17 of 18)	17680	Mir128-2	-2.45443	0.00411391	0.0680503	-3.37131	0.000173663	0.00812121	-3.73179	1.71523e-05	0.00131443	0.786459	0.40262	0.62658	-1.05661	0.272454	0.460422	22.4272	84.568	5.33045	9.35756	4.06884	1.60185	3.47957	1.09388	0	13.5384	0	0.420173	0	0	0	1	0	1	0	0
chr14	78618825	78619024	intron (NM_001081336, intron 8 of 28)	10366	Dgkh	-1.90793	0.00697967	0.0953735	-3.37	1.73157e-05	0.00154573	-2.01304	0.00387722	0.062947	1.03546	0.215279	0.426892	-1.90332	0.017367	0.0579363	26.9127	77.8026	10.0338	14.0363	2.03442	4.80554	9.74279	11.6681	5.45195	11.6044	2.47504	1.68069	0	0	0	1	0	0	0	0
chr2	84016385	84016584	Intergenic	-75258	Zswim2	-4.27186	2.654e-12	3.76259e-09	-3.3645	2.81398e-08	9.41941e-06	-3.15604	2.55245e-08	7.32339e-06	-0.461032	0.504473	0.710825	-1.35837	0.0388912	0.110801	130.078	177.593	6.89823	4.67878	16.2753	8.00923	11.1346	17.8667	10.9039	5.80219	9.90016	2.94121	0	1	0	1	0	1	0	0
chr14	121553830	121554029	intron (NM_001347596, intron 49 of 52)	-48675	Slc15a1	-3.4193	3.68345e-05	0.00240949	-3.36346	6.94656e-05	0.0042709	-3.99286	1.35959e-06	0.000183245	0.717128	0.415475	0.638282	-0.402509	0.654443	0.793514	81.4857	87.9507	7.52534	1.55959	7.12046	3.20369	2.78365	3.28164	0	21.2747	4.95008	0.420173	0	1	0	1	0	1	0	0
chr2	91217053	91217252	exon (NM_028119, exon 6 of 10)	14240	Acp2	-1.94345	0.0135061	0.145892	-3.36058	0.000105265	0.00571044	-1.55644	0.0427365	0.27098	1.01588	0.270534	0.493016	-1.58234	0.0606943	0.156859	28.4078	40.5926	7.8389	6.23837	3.05163	0	11.8305	8.02179	2.72597	7.73626	4.95008	1.26052	0	0	0	1	0	0	0	0
chr2	6162727	6162926	Intergenic	29943	Gm10857	-3.14894	1.05173e-07	2.5475e-05	-3.35007	6.96204e-08	1.84387e-05	-3.07338	1.00507e-07	2.31072e-05	0.298442	0.659861	0.822315	-2.38313	0.0010706	0.00535322	115.127	148.84	15.6778	7.79797	14.2409	6.40738	13.9183	12.7619	6.81494	21.2747	2.47504	1.26052	0	1	0	1	0	1	0	0
chr18	68765682	68765881	Intergenic	26381	Mir6356	-1.79907	0.0267828	0.226013	-3.34815	0.000151556	0.00737976	-3.56328	2.17815e-05	0.00159552	2.15596	0.0170616	0.0659931	1.59932	0.0657763	0.166547	25.4175	47.3581	7.52534	9.35756	3.05163	0	1.39183	1.82314	5.45195	23.2088	14.8502	2.52104	0	0	0	1	0	1	0	0
chr14	8666124	8666323	promoter-TSS (NM_028934)	67	4930452B06Rik	-2.16871	0.00162779	0.0365964	-3.34687	5.62338e-06	0.000657909	-3.48896	6.15733e-07	0.000101642	1.40244	0.0664623	0.187249	0.0872277	0.90817	0.950466	57.5633	118.395	18.1862	14.0363	11.1893	0	6.26322	5.10478	16.3558	23.2088	12.3752	2.52104	0	1	0	1	0	1	0	0
chr4	32571054	32571253	intron (NR_026843, intron 1 of 4)	509	Bach2os	-2.55963	0.00172788	0.0380655	-3.34452	0.00013083	0.00666719	-3.18682	9.54594e-05	0.00495178	0.0478596	0.96025	0.983427	-1.20086	0.195675	0.367007	24.67	55.8149	5.33045	4.67878	3.05163	1.60185	2.08774	3.64627	1.36299	3.86813	0	0.840345	0	1	0	1	0	1	0	0
chr5	89090225	89090424	intron (NM_001197147, intron 7 of 25)	203064	Slc4a4	-4.13365	2.14953e-08	7.04842e-06	-3.34304	5.61849e-06	0.000657909	-3.37486	1.66591e-06	0.000215861	-0.348732	0.666054	0.82611	-1.53414	0.0569084	0.149161	83.7284	153.914	6.27112	1.55959	8.13767	9.61107	7.65505	9.4803	5.45195	7.73626	7.42512	0	0	1	0	1	0	1	0	0
chr16	20827645	20827844	Intergenic	-93233	Thpo	-2.64409	0.000532084	0.0172016	-3.34291	4.53685e-05	0.00314482	-3.13735	3.60839e-05	0.0023632	1.13226	0.190935	0.394913	0.820573	0.304551	0.495409	53.8254	38.9013	6.27112	4.67878	5.08605	0	2.08774	5.10478	6.81494	9.67032	12.3752	4.6219	0	1	0	1	0	1	0	0
chr16	95284255	95284454	intron (NM_001271687, intron 3 of 4)	26796	Kcnj15	-2.80877	0.000319989	0.0122123	-3.34033	3.85609e-05	0.00279926	-3.40801	1.20369e-05	0.000995204	0.0948064	0.913113	0.961033	-0.21872	0.793292	0.88361	74.7575	93.0248	5.0169	14.0363	10.1721	0	7.65505	3.28164	2.72597	9.67032	9.90016	1.26052	0	1	0	1	0	1	0	0
chr11	19965075	19965274	intron (NM_033523, intron 1 of 5)	40732	Spred2	-1.56268	0.0560347	0.346192	-3.33775	0.000198301	0.00904303	-2.13611	0.00881263	0.106781	1.78029	0.0547169	0.161698	1.21075	0.144246	0.296578	31.3981	28.7531	7.52534	9.35756	2.03442	0	6.26322	4.0109	5.45195	11.6044	29.7005	2.94121	0	0	0	1	0	0	0	0
chr10	54065217	54065416	intron (NM_008548, intron 2 of 12)	10480	Man1a	-1.88786	0.0138053	0.148106	-3.33152	9.01716e-05	0.00510363	-2.19602	0.00380876	0.0621621	2.0081	0.0221871	0.0807385	-0.214355	0.791341	0.882396	35.136	32.1358	7.21179	7.79797	3.05163	0	6.95914	4.74015	12.2669	11.6044	9.90016	2.10086	0	0	0	1	0	0	0	0
chr14	18618864	18619063	intron (NM_144839, intron 4 of 5)	274664	Ube2e2	-3.46731	6.75951e-05	0.00378863	-3.32826	0.000184974	0.00855672	-2.43564	0.00357722	0.0592998	1.36569	0.137081	0.314486	-1.44252	0.112603	0.248727	25.4175	76.1112	2.19489	3.11919	5.08605	0	7.65505	5.83403	5.45195	15.4725	4.95008	0	0	1	0	1	0	0	0	0
chr14	75506313	75506512	intron (NM_001128093, intron 1 of 1)	50430	Siah3	-2.38698	0.00142941	0.0333983	-3.3246	3.26905e-05	0.00245827	-3.00279	5.83781e-05	0.00339438	-0.220898	0.803885	0.906322	-1.99141	0.0236403	0.0744292	62.0487	64.2717	7.8389	12.4767	4.06884	4.80554	7.65505	4.37552	0	7.73626	2.47504	0	0	1	0	1	0	1	0	0
chr8	34046857	34047056	Intergenic	60858	Dctn6	-4.54708	2.04552e-09	1.02706e-06	-3.32125	7.43607e-06	0.000822096	-2.9847	1.5375e-05	0.00120576	-1.36397	0.126284	0.297326	-1.53809	0.05419	0.143662	77.7478	89.6421	2.50845	1.55959	9.15488	3.20369	11.8305	5.46941	2.72597	0	0	2.94121	0	1	0	1	0	1	0	0
chr2	16292045	16292244	Intergenic	-64160	Plxdc2	-2.27581	0.00942217	0.116061	-3.31478	0.000336491	0.0134663	-3.3256	0.000169526	0.00735507	1.00874	0.295147	0.521419	0.64621	0.484601	0.663109	30.6506	45.6667	8.46601	1.55959	2.03442	1.60185	2.78365	1.45851	6.81494	3.86813	9.90016	0.420173	0	0	0	1	0	1	0	0
chr2	36157564	36157763	intron (NM_026422, intron 4 of 6)	-20959	Rbm18	-3.014	6.56949e-05	0.00372115	-3.3079	3.04352e-05	0.00233701	-3.66107	1.27028e-06	0.000174445	1.3143	0.112182	0.27335	0.753925	0.348934	0.540289	53.0778	67.6544	5.95756	4.67878	6.10326	1.60185	2.08774	4.0109	19.0818	5.80219	12.3752	2.52104	0	1	0	1	0	1	0	0
chr16	94254684	94254883	intron (NM_139145, intron 4 of 9)	33073	Hlcs	-2.85421	0.000414926	0.0147822	-3.30707	7.49525e-05	0.00446584	-4.63488	2.85256e-08	8.04089e-06	0.272808	0.75704	0.88004	0.866032	0.329357	0.520941	121.107	47.3581	7.8389	9.35756	9.15488	1.60185	0	2.91702	6.81494	7.73626	9.90016	0.420173	0	1	0	1	0	1	0	0
chr17	48293544	48293743	Intergenic	-6395	Treml2	-3.32479	3.4364e-05	0.00229993	-3.30481	7.76299e-05	0.00458568	-2.49397	0.00109348	0.0274409	1.17055	0.183501	0.384972	-1.2137	0.154523	0.311515	57.5633	30.4445	2.822	3.11919	5.08605	0	7.65505	4.74015	5.45195	11.6044	2.47504	1.68069	0	1	0	1	0	1	0	0
chr3	115971296	115971495	intron (NM_023214, intron 8 of 10)	-8507	Mir669n	-2.40194	0.00225759	0.0456079	-3.29297	0.000110745	0.00591282	-2.80387	0.000326346	0.0117007	0.952431	0.293807	0.519895	-0.694119	0.422622	0.609316	37.3787	37.2099	5.95756	4.67878	4.06884	0	4.17548	3.64627	4.08896	7.73626	2.47504	1.68069	0	1	0	1	0	1	0	0
chr13	28720326	28720525	intron (NR_045053, intron 3 of 8)	-9552	Mir6368	-2.9406	0.000444139	0.0154947	-3.29096	0.000127489	0.00657949	-3.49816	2.77765e-05	0.00191817	0.136269	0.880214	0.94525	0.515496	0.55234	0.717586	65.039	104.864	5.95756	9.35756	7.12046	3.20369	8.35096	1.09388	2.72597	9.67032	17.3253	0.420173	0	1	0	1	0	1	0	0
chr9	115471713	115471912	Intergenic	89993	Mir467h	-4.18068	1.18969e-07	2.80265e-05	-3.29082	2.83559e-05	0.00222608	-3.91636	2.64275e-07	4.95665e-05	0.770236	0.353448	0.580414	0.308099	0.708832	0.829782	65.7866	81.1853	2.822	1.55959	7.12046	3.20369	3.47957	2.91702	4.08896	17.4066	9.90016	1.26052	0	1	0	1	0	1	0	0
chr8	35321593	35321792	Intergenic	-54049	Ppp1r3b	-3.75182	9.53753e-08	2.35758e-05	-3.28923	4.14891e-06	0.000520796	-2.94505	1.02266e-05	0.000867857	0.391554	0.61101	0.789109	-0.716615	0.329845	0.521355	41.8642	145.457	5.95756	3.11919	9.15488	4.80554	11.8305	7.65717	6.81494	13.5384	7.42512	4.20173	0	1	0	1	0	1	0	0
chr2	117988631	117988830	intron (NR_126479, intron 8 of 9)	122472	Gm13986	-4.44978	1.80109e-07	3.8931e-05	-3.28807	8.98903e-05	0.00510352	-3.73785	3.68865e-06	0.00039852	0.050544	0.955828	0.981317	-0.513774	0.567588	0.729317	44.8545	71.0371	1.88134	0	6.10326	1.60185	3.47957	2.18776	1.36299	7.73626	0	2.10086	0	1	0	1	0	1	0	0
chr1	57852698	57852897	intron (NM_001164566, intron 1 of 11)	7226	Spats2l	-2.67635	0.000671442	0.0200092	-3.28772	9.56543e-05	0.00532417	-3.13311	6.19624e-05	0.0035769	1.99946	0.0210338	0.0775516	-1.01086	0.25654	0.442297	35.136	45.6667	6.58468	1.55959	2.03442	3.20369	3.47957	2.91702	10.9039	19.3406	2.47504	0.420173	0	1	0	1	0	1	0	0
chr10	122602360	122602559	Intergenic	-32568	A130077B15Rik	-1.40284	0.0872153	0.440943	-3.28533	0.000270749	0.0114984	-2.41098	0.00351313	0.0586967	2.42572	0.008264	0.0372073	0.457866	0.594976	0.749857	29.1554	27.0618	5.0169	14.0363	2.03442	0	4.17548	3.28164	4.08896	25.1428	9.90016	2.94121	0	0	0	1	0	0	0	0
chr17	52213063	52213262	Intergenic	330435	Gm20098	-2.10979	0.0184658	0.178089	-3.28504	0.000461031	0.0164704	-3.76607	3.78062e-05	0.00244035	1.79564	0.0604263	0.174255	1.3678	0.146837	0.300303	47.8448	32.1358	6.89823	6.23837	2.03442	1.60185	0	2.18776	2.72597	21.2747	12.3752	0.420173	0	0	0	1	0	1	0	0
chr3	38568632	38568831	Intergenic	-83915	Ankrd50	-2.99066	4.62263e-08	1.31071e-05	-3.28242	2.26118e-08	8.19499e-06	-3.59167	5.14784e-11	4.35327e-08	1.57458	0.0103022	0.0443182	1.11101	0.0568933	0.149131	119.612	94.7162	10.3473	14.0363	10.1721	8.00923	6.26322	8.38642	39.5266	21.2747	17.3253	17.2271	0	1	0	1	0	1	0	0
chr15	25910444	25910643	intron (NM_001034851, intron 3 of 8)	-23009	Retreg1	-2.7317	1.89483e-05	0.00148754	-3.27534	1.32619e-06	0.000210973	-2.91855	3.49259e-06	0.000383485	0.891714	0.213634	0.424871	-0.746869	0.285005	0.474471	86.7187	109.938	7.8389	18.7151	5.08605	11.2129	13.2224	8.38642	8.17792	25.1428	2.47504	7.14293	0	1	0	1	0	1	0	0
chr14	8632251	8632450	intron (NM_028934, intron 4 of 15)	33940	4930452B06Rik	-3.13105	0.000722674	0.0210352	-3.27475	0.000546776	0.0187052	-3.23006	0.00041835	0.0138593	0.954768	0.329026	0.555935	-0.887707	0.364886	0.555886	33.6409	57.5062	3.76267	1.55959	3.05163	1.60185	4.8714	0.729254	0	13.5384	2.47504	0	0	1	0	1	0	1	0	0
chr6	142942045	142942244	intron (NM_011374, intron 1 of 4)	22308	St8sia1	-2.02125	0.00430347	0.070056	-3.26973	2.43594e-05	0.00198676	-1.98425	0.00433785	0.0679516	0.639565	0.44413	0.663381	-1.73464	0.0274653	0.0840505	57.5633	50.7408	11.6016	10.9172	3.05163	4.80554	5.56731	17.1375	2.72597	11.6044	2.47504	2.52104	0	0	0	1	0	0	0	0
chr15	12925765	12925964	intron (NM_001130149, intron 30 of 34)	101049	Drosha	-1.51098	0.0760708	0.409192	-3.26652	0.000339238	0.0135364	-3.22682	0.000205935	0.00842653	0.432626	0.654652	0.818591	-0.956085	0.316272	0.507843	44.1069	35.5186	4.70334	20.2747	4.06884	0	2.08774	2.91702	0	7.73626	0	0.840345	0	0	0	1	0	1	0	0
chr12	59151610	59151809	intron (NM_001329047, intron 14 of 29)	20256	Mia2	-1.59801	0.0513697	0.329403	-3.2607	0.000317162	0.0129011	-1.84772	0.0228455	0.189796	1.2656	0.184194	0.385838	-0.769899	0.377339	0.567912	20.9321	30.4445	8.46601	4.67878	2.03442	0	4.8714	6.19866	4.08896	5.80219	4.95008	1.68069	0	0	0	1	0	0	0	0
chr14	30138078	30138277	intron (NM_001302637, intron 9 of 48)	115544	Chdh	-2.35139	0.00510885	0.0783425	-3.25588	0.000258848	0.0111302	-3.97499	4.5756e-06	0.00046973	0.740876	0.431634	0.652785	0.786705	0.394463	0.583966	38.8739	40.5926	6.58468	4.67878	3.05163	1.60185	1.39183	1.09388	2.72597	7.73626	7.42512	0.420173	0	0	0	1	0	1	0	0
chr3	53037055	53037254	Intergenic	-4393	Lhfp	-2.94622	1.13819e-05	0.000999329	-3.25528	7.13251e-06	0.000799538	-1.93452	0.00215104	0.0426425	1.73044	0.0222161	0.0808196	0.968464	0.133483	0.2803	47.0972	55.8149	6.27112	3.11919	4.06884	3.20369	9.74279	13.4912	8.17792	25.1428	24.7504	24.7902	0	1	0	1	0	1	0	0
chr16	78337262	78337461	3' UTR (NM_001025192, exon 7 of 7)	35690	Cxadr	-2.08546	0.00803778	0.104916	-3.24771	0.000127107	0.00656679	-2.40734	0.00202274	0.0410008	0.592568	0.513473	0.718046	-1.37508	0.113139	0.249533	34.3884	54.1235	7.52534	9.35756	5.08605	0	2.78365	9.4803	2.72597	7.73626	2.47504	1.26052	0	0	0	1	0	1	0	0
chr1	20981910	20982109	intron (NM_027974, intron 9 of 10)	30383	Efhc1	-1.8552	0.0342477	0.261534	-3.2474	0.000571818	0.0193423	-4.10251	8.95989e-06	0.000780985	2.65935	0.0053266	0.0261273	0.692995	0.483388	0.662219	20.1845	30.4445	4.70334	6.23837	2.03442	0	0	0.729254	5.45195	27.0769	2.47504	0.420173	0	0	0	1	0	1	0	0
chr1	164453815	164454014	intron (NM_009721, intron 1 of 5)	4441	Atp1b1	-3.00683	1.22608e-06	0.000183619	-3.24448	4.38092e-07	8.87266e-05	-2.45351	4.64761e-05	0.00285018	0.0808434	0.90726	0.958204	-2.0681	0.00269516	0.0119801	101.67	196.198	15.0507	15.5959	19.327	4.80554	35.4916	12.0327	14.9929	11.6044	7.42512	2.94121	0	1	0	1	0	1	0	0
chr2	9592687	9592886	Intergenic	285814	Gata3	-2.92741	0.0008304	0.0229644	-3.24402	0.000395281	0.0148854	-2.15948	0.0105305	0.119012	1.80671	0.0548523	0.161947	-2.06608	0.0289876	0.0877024	23.1748	40.5926	4.07623	0	3.05163	0	6.26322	4.37552	6.81494	13.5384	0	0.420173	0	1	0	1	0	0	0	0
chr1	177700638	177700837	Intergenic	-29077	1700016C15Rik	-2.03387	0.00189779	0.0406747	-3.23974	5.94884e-06	0.000688027	-4.14413	2.59427e-09	1.17971e-06	1.07229	0.156494	0.345007	0.00413463	0.995832	0.998214	59.806	84.568	16.3049	14.0363	9.15488	1.60185	2.08774	3.28164	10.9039	17.4066	4.95008	1.68069	0	1	0	1	0	1	0	0
chr2	3910474	3910673	Intergenic	-107110	Frmd4a	-2.54784	0.000743911	0.0214563	-3.2366	5.09359e-05	0.00336331	-2.39228	0.00123233	0.0298046	0.597696	0.482189	0.693925	-2.45747	0.00458119	0.0188319	32.1457	94.7162	6.58468	10.9172	3.05163	6.40738	13.9183	5.46941	2.72597	13.5384	0	0.840345	0	1	0	1	0	1	0	0
chr15	31650923	31651122	Intergenic	48906	Fam173b	-2.79464	0.00010131	0.00517852	-3.23268	1.50628e-05	0.00139626	-2.35225	0.000817163	0.0223546	0.243495	0.759946	0.881589	-1.80297	0.0207764	0.0669695	113.631	84.568	15.9914	4.67878	14.2409	0	11.1346	20.4191	4.08896	15.4725	4.95008	2.52104	0	1	0	1	0	1	0	0
chr9	83893208	83893407	Intergenic	-31830	Bckdhb	-3.1476	1.08745e-06	0.000168163	-3.22728	2.15428e-06	0.000315553	-2.82924	5.17994e-06	0.000505433	0.816987	0.264333	0.485842	0.0609042	0.927704	0.961305	65.039	86.2594	5.33045	9.35756	6.10326	6.40738	9.74279	8.02179	17.7188	5.80219	7.42512	10.0841	0	1	0	1	0	1	0	0
chr18	81568733	81568932	Intergenic	423248	Mir5127	-2.85149	0.000704439	0.0207477	-3.22548	0.000218034	0.00970065	-3.43883	4.23438e-05	0.00267193	1.05706	0.242876	0.461728	-1.12109	0.229403	0.410045	82.2332	27.0618	2.50845	9.35756	4.06884	3.20369	2.08774	4.0109	2.72597	17.4066	2.47504	0	0	1	0	1	0	1	0	0
chr13	9027405	9027604	Intergenic	-31492	Gtpbp4	-3.25997	2.87628e-06	0.000355689	-3.22452	8.91062e-06	0.000950243	-3.14949	3.20283e-06	0.000360708	2.26391	0.00221946	0.0128956	1.48215	0.033738	0.0989979	32.1457	106.556	3.76267	7.79797	8.13767	1.60185	4.17548	7.29254	36.8007	29.011	24.7504	15.1262	0	1	0	1	0	1	1	0
chr15	10256099	10256298	intron (NM_001253781, intron 1 of 9)	32292	Prlr	-3.57911	8.35651e-05	0.00446834	-3.21899	0.000487297	0.0171827	-3.32634	0.000180264	0.00766909	0.471915	0.627168	0.800158	-1.6356	0.0960707	0.221516	35.136	52.4322	2.19489	1.55959	5.08605	0	3.47957	1.82314	0	9.67032	0	0	0	1	0	1	0	1	0	0
chr2	19601156	19601355	Intergenic	-47345	4921504E06Rik	-3.74778	0.000102716	0.00521719	-3.21378	0.000969893	0.0281462	-2.68969	0.00369958	0.0607564	-0.437698	0.674013	0.831024	-1.87902	0.0613775	0.15816	20.1845	38.9013	0.627112	1.55959	3.05163	0	2.08774	3.64627	0	1.93406	0	0	0	1	0	1	0	0	0	0
chr4	111440410	111440609	intron (NR_033793, intron 3 of 5)	25503	Bend5	-3.18057	0.000114998	0.00568528	-3.21037	0.000170827	0.00803337	-4.41865	1.91578e-07	3.78461e-05	-0.392946	0.678293	0.833553	-0.997442	0.305417	0.496449	35.136	65.963	4.38978	3.11919	3.05163	4.80554	1.39183	1.09388	0	5.80219	0	0	0	1	0	1	0	1	0	0
chr1	21052322	21052521	intron (NM_177409, intron 1 of 10)	26804	Tram2	-2.88464	0.000437718	0.0153454	-3.21036	0.000147927	0.00729823	-4.49891	1.00331e-07	2.31072e-05	0.677084	0.443296	0.662706	1.36452	0.123233	0.26536	56.0681	86.2594	5.95756	7.79797	5.08605	4.80554	1.39183	1.45851	0	19.3406	12.3752	1.26052	0	1	0	1	0	1	0	0
chr15	101135447	101135646	intron (NM_001277257, intron 4 of 10)	7024	Acvrl1	-2.5951	0.00143933	0.0335709	-3.20974	0.000142067	0.00709626	-3.82069	3.5779e-06	0.000389114	0.547881	0.534651	0.733952	1.451	0.0876195	0.206899	68.7769	77.8026	11.9151	4.67878	5.08605	4.80554	4.17548	1.82314	0	17.4066	22.2754	2.52104	0	1	0	1	0	1	0	0
chr3	31085052	31085251	Intergenic	-9907	Skil	-1.91797	0.0120794	0.135722	-3.20943	0.000118943	0.00625225	-3.08194	7.16644e-05	0.00397054	1.43099	0.100134	0.25219	1.86679	0.0186915	0.0615206	40.369	37.2099	6.58468	10.9172	3.05163	1.60185	4.17548	2.18776	4.08896	15.4725	27.2254	6.30259	0	0	0	1	0	1	0	0
chr2	34042391	34042590	intron (NR_130173, intron 1 of 3)	65245	C230014O12Rik	-3.39018	6.79107e-06	0.000659966	-3.20632	3.2144e-05	0.00243617	-2.603	0.000322238	0.0116278	-0.250609	0.767491	0.885822	-0.479805	0.534522	0.703271	133.816	20.2963	6.58468	3.11919	7.12046	4.80554	9.74279	10.5742	5.45195	3.86813	9.90016	5.04207	0	1	0	1	0	1	0	0
chr7	122247280	122247479	Intergenic	27883	Chp2	-2.13421	0.009595	0.117296	-3.20134	0.000314427	0.0128007	-2.44217	0.00276584	0.0504995	1.47327	0.110998	0.271356	-0.19441	0.823269	0.901706	23.1748	38.9013	4.70334	6.23837	3.05163	0	6.26322	2.18776	4.08896	11.6044	4.95008	2.52104	0	0	0	1	0	0	0	0
chr16	87723535	87723734	intron (NM_007520, intron 4 of 4)	24680	Bach1	-2.80898	2.75105e-08	8.55524e-06	-3.19662	3.07497e-09	1.42519e-06	-2.70196	3.86452e-08	1.06444e-05	1.21662	0.0321047	0.1076	-0.132152	0.804123	0.889962	116.622	170.827	17.8727	18.7151	15.2581	11.2129	17.3978	21.8776	44.9786	21.2747	17.3253	18.0674	0	1	0	1	0	1	0	0
chr17	51803041	51803240	intron (NM_009122, intron 5 of 10)	8914	Satb1	-2.53855	0.000346783	0.0129328	-3.18946	3.66119e-05	0.0026943	-3.64799	5.47415e-07	9.19391e-05	2.03311	0.0106822	0.0456595	2.49245	0.000830161	0.00427852	37.3787	49.0494	5.64401	6.23837	3.05163	3.20369	1.39183	2.91702	9.54091	27.0769	24.7504	13.0254	0	1	0	1	0	1	0	0
chr12	4558917	4559116	Intergenic	-33992	Itsn2	-3.20483	1.00802e-07	2.45397e-05	-3.18756	3.33209e-07	7.10678e-05	-2.96441	3.64677e-07	6.6837e-05	-1.12474	0.134958	0.311331	-1.0295	0.119926	0.260051	87.4663	155.605	10.9745	10.9172	16.2753	4.80554	15.3101	11.3034	2.72597	5.80219	7.42512	5.04207	0	1	0	1	0	1	0	0
chr16	24050962	24051161	Intergenic	-62449	Bcl6	-2.38299	0.00340959	0.0600691	-3.18142	0.000233767	0.010253	-2.51261	0.00174294	0.0370919	1.16725	0.196282	0.402262	-2.42985	0.00909163	0.0338222	24.67	59.1976	3.76267	9.35756	5.08605	0	4.8714	5.83403	5.45195	11.6044	0	0	0	0	0	1	0	1	0	0
chr9	42838346	42838545	intron (NM_175481, intron 1 of 20)	105926	Grik4	-1.98263	0.0232645	0.206404	-3.18017	0.000573563	0.0193877	-4.52951	9.43308e-07	0.000137314	1.58552	0.0943658	0.241729	0.463652	0.641149	0.7848	20.9321	54.1235	4.38978	10.9172	4.06884	0	0	0.729254	5.45195	15.4725	2.47504	0	0	0	0	1	0	1	0	0
chr5	64342223	64342422	intron (NM_001310611, intron 20 of 21)	111965	Tbc1d1	-3.53785	5.64646e-05	0.00334871	-3.17817	0.000373705	0.0143519	-3.09912	0.000270735	0.0102368	-0.193788	0.841416	0.926065	-1.07606	0.251226	0.436068	23.1748	67.6544	3.44912	0	3.05163	3.20369	4.8714	2.18776	1.36299	3.86813	2.47504	0.420173	0	1	0	1	0	1	0	0
chr15	41447340	41447539	promoter-TSS (NM_001130166)	-43	Oxr1	-1.91091	0.0023416	0.0466211	-3.17671	1.26096e-06	0.00020328	-3.37652	1.05804e-07	2.40565e-05	1.43315	0.0323329	0.108177	0.426947	0.519911	0.69278	98.6799	257.087	32.6098	51.4666	27.4646	1.60185	14.6142	12.0327	62.6974	30.945	29.7005	10.5043	0	1	0	1	0	1	0	0
chr15	93751058	93751257	Intergenic	-155266	Prickle1	-2.06671	0.00380089	0.0643797	-3.17435	3.44904e-05	0.00257753	-2.64571	0.000201721	0.00830462	1.15941	0.147903	0.331746	-1.13947	0.15131	0.306743	50.8351	77.8026	15.3642	9.35756	5.08605	4.80554	12.5264	4.0109	14.9929	11.6044	7.42512	0.840345	0	0	0	1	0	1	0	0
chr1	164061987	164062186	promoter-TSS (NM_001164059)	10	Sell	-2.43358	0.000648359	0.0195448	-3.17386	2.49308e-05	0.0020054	-2.65142	0.000170754	0.00738179	0.811292	0.305808	0.532208	-0.364884	0.628376	0.775574	55.3205	99.7902	11.9151	10.9172	7.12046	4.80554	9.04688	10.2096	10.9039	13.5384	17.3253	1.26052	0	1	0	1	0	1	0	0
chr6	67056164	67056363	intron (NR_040278, intron 1 of 6)	-18856	Gadd45a	-3.06272	4.1318e-07	7.54398e-05	-3.17265	6.50097e-07	0.000118697	-2.11174	0.000227336	0.00897617	0.0825161	0.907849	0.958401	-1.88761	0.00475833	0.0194803	100.175	82.8766	10.0338	7.79797	11.1893	4.80554	19.4856	18.596	8.17792	9.67032	7.42512	2.94121	0	1	0	1	0	1	0	0
chr9	101057206	101057405	Intergenic	-17457	Msl2	-2.3082	0.00176127	0.038607	-3.17109	5.17366e-05	0.00339756	-2.3241	0.00138386	0.0320695	0.987123	0.229407	0.445128	-0.220799	0.773298	0.871287	38.1263	87.9507	5.95756	15.5959	7.12046	1.60185	13.2224	6.92791	5.45195	17.4066	14.8502	4.20173	0	1	0	1	0	1	0	0
chr3	133339457	133339656	intron (NM_146141, intron 6 of 11)	29446	Ppa2	-2.7918	0.000142972	0.00665206	-3.16982	3.54987e-05	0.00262843	-3.2354	9.08658e-06	0.000787754	1.21243	0.1277	0.299882	-0.435045	0.585585	0.742697	68.7769	79.4939	10.6609	4.67878	4.06884	8.00923	5.56731	5.83403	8.17792	25.1428	9.90016	0.840345	0	1	0	1	0	1	0	0
chr3	135514162	135514361	intron (NM_027288, intron 4 of 16)	28650	Manba	-3.03456	5.82187e-08	1.58546e-05	-3.16892	6.15508e-08	1.7051e-05	-3.34983	1.28411e-09	6.65555e-07	-0.147819	0.821814	0.916205	-0.762147	0.229022	0.409532	163.719	104.864	14.4236	14.0363	10.1721	16.0185	6.95914	14.9497	9.54091	13.5384	7.42512	5.46224	0	1	0	1	0	1	0	0
chr13	17081669	17081868	intron (NM_138654, intron 12 of 13)	612997	Sugct	-2.64443	0.00409085	0.0677841	-3.16858	0.000910722	0.0268329	-4.53193	2.1356e-06	0.00026127	-0.213522	0.834299	0.922254	-0.23452	0.819539	0.899317	25.4175	43.9754	3.13556	4.67878	4.06884	0	0	0.729254	0	3.86813	0	0	0	0	0	1	0	1	0	0
chr10	41603633	41603832	intron (NM_001303469, intron 2 of 20)	2863	Ccdc162	-3.10721	0.000261998	0.010524	-3.16817	0.000323726	0.0130642	-3.92739	4.80253e-06	0.000481272	-0.162452	0.865959	0.938252	-0.533662	0.577516	0.736752	31.3981	54.1235	3.44912	3.11919	3.05163	3.20369	0.695914	2.18776	0	5.80219	0	0.840345	0	1	0	1	0	1	0	0
chr15	59246875	59247074	Intergenic	-59974	Zfp572	-2.48306	0.00781019	0.102832	-3.16574	0.0010406	0.0294879	-4.05721	2.08462e-05	0.00153644	1.41269	0.152879	0.339541	-0.473965	0.641885	0.785129	20.9321	50.7408	5.95756	1.55959	1.01721	3.20369	0.695914	0.729254	0	17.4066	0	0	0	0	0	1	0	1	0	0
chr8	77713803	77714002	intron (NM_010332, intron 2 of 7)	10550	Ednra	-3.10266	0.000146879	0.00679633	-3.16157	0.000181164	0.00841278	-3.91176	2.00943e-06	0.000248355	1.05357	0.231603	0.447928	-0.773901	0.405215	0.593641	31.3981	76.1112	5.95756	1.55959	2.03442	6.40738	2.78365	1.45851	12.2669	7.73626	2.47504	0	0	1	0	1	0	1	0	0
chr14	61601398	61601597	intron (NM_023233, intron 2 of 2)	1985	Trim13	-3.31472	0.000146759	0.00679633	-3.15988	0.000382591	0.0145669	-3.55647	3.82052e-05	0.0024587	0.706443	0.446528	0.665414	0.688866	0.445588	0.630052	70.272	33.8272	5.0169	0	5.08605	1.60185	0.695914	4.0109	2.72597	11.6044	9.90016	1.68069	0	1	0	1	0	1	0	0
chr5	67395502	67395701	3' UTR (NM_001164806, exon 5 of 5)	32198	Bend4	-2.71651	0.000340351	0.0127571	-3.15792	8.87228e-05	0.00504318	-2.23956	0.00223027	0.0437717	2.20942	0.00723336	0.0333735	1.61988	0.0288312	0.0873325	52.3302	32.1358	7.52534	0	5.08605	0	6.95914	7.29254	23.1708	17.4066	39.6007	15.9666	0	1	0	1	0	1	0	0
chr10	57727790	57727989	intron (NM_008863, intron 4 of 5)	-57034	Fabp7	-3.04005	0.000166001	0.00747114	-3.15702	0.000142264	0.00709876	-2.85793	0.000303088	0.0111268	0.685266	0.429918	0.651295	-0.457596	0.587287	0.744018	30.6506	106.556	6.27112	4.67878	9.15488	0	8.35096	5.10478	12.2669	5.80219	9.90016	1.26052	0	1	0	1	0	1	0	0
chr2	91645900	91646099	exon (NM_001033451, exon 4 of 4)	3779	Zfp408	-2.11656	0.00199383	0.0420047	-3.15524	2.07881e-05	0.00178615	-3.73808	1.40953e-07	2.9669e-05	-0.0678641	0.934613	0.971554	0.147314	0.851454	0.918961	72.5148	54.1235	13.7965	10.9172	7.12046	3.20369	3.47957	3.28164	2.72597	7.73626	7.42512	2.10086	0	1	0	1	0	1	0	0
chr7	75496948	75497147	intron (NM_029332, intron 1 of 36)	41513	Akap13	-2.75275	0.00100537	0.0262092	-3.15236	0.000328769	0.0132503	-2.90135	0.000434746	0.0142281	0.584813	0.531361	0.73156	-0.131511	0.881752	0.935616	41.8642	33.8272	4.38978	3.11919	2.03442	3.20369	2.78365	4.0109	6.81494	1.93406	7.42512	0.840345	0	1	0	1	0	1	0	0
chr16	92884069	92884268	Intergenic	-58094	Runx1	-1.41031	0.0568661	0.349135	-3.1462	0.000112477	0.00598321	-3.03909	6.32652e-05	0.00360889	2.32701	0.00501759	0.0248895	-0.0997679	0.903999	0.948013	22.4272	64.2717	10.3473	18.7151	4.06884	1.60185	4.8714	2.55239	9.54091	36.7472	2.47504	3.36138	0	0	0	1	0	1	0	0
chr3	41408544	41408743	Intergenic	84556	Platr4	-1.87303	0.008072	0.105187	-3.1457	4.53085e-05	0.00314482	-2.24347	0.0013771	0.03204	1.56727	0.0501803	0.151411	-0.924674	0.229922	0.410562	62.0487	40.5926	9.40668	15.5959	7.12046	0	8.35096	9.4803	8.17792	23.2088	2.47504	4.6219	0	0	0	1	0	1	0	0
chr3	27462632	27462831	intron (NM_173182, intron 16 of 25)	91380	Ghsr	-2.06362	0.0101334	0.121354	-3.13778	0.000205965	0.0092958	-2.56911	0.00130885	0.0310722	1.36489	0.116877	0.28163	0.323856	0.695991	0.821433	55.3205	54.1235	14.4236	4.67878	4.06884	3.20369	9.04688	4.37552	5.45195	21.2747	19.8003	1.26052	0	0	0	1	0	1	0	0
chr17	62818863	62819062	intron (NM_010109, intron 1 of 3)	62355	Efna5	-2.54287	0.00612403	0.0873603	-3.1376	0.00112956	0.0311392	-3.1904	0.000585336	0.0174378	-0.534707	0.605193	0.784729	-0.995374	0.319982	0.511613	21.6797	38.9013	5.64401	0	2.03442	1.60185	1.39183	2.18776	1.36299	0	0	0.420173	0	0	0	1	0	1	0	0
chr14	48376213	48376412	Intergenic	-69811	Tmem260	-2.96374	5.80485e-05	0.00342479	-3.13548	4.51072e-05	0.00313746	-3.29488	6.2001e-06	0.000584847	0.655743	0.42247	0.644101	-0.437625	0.587651	0.744335	50.8351	79.4939	5.33045	7.79797	7.12046	3.20369	4.8714	4.74015	4.08896	15.4725	7.42512	1.26052	0	1	0	1	0	1	0	0
chr10	68901232	68901431	Intergenic	177585	Tmem26	-3.19038	6.86011e-05	0.00383622	-3.13453	0.000144896	0.00719271	-3.81852	1.91032e-06	0.000238553	0.85057	0.326	0.553016	1.09258	0.195289	0.36662	42.6118	69.3458	2.822	6.23837	5.08605	3.20369	2.08774	2.55239	6.81494	11.6044	14.8502	1.26052	0	1	0	1	0	1	0	0
chr5	149324833	149325032	Intergenic	59928	Alox5ap	-2.20888	0.00494564	0.0767513	-3.12754	0.000143545	0.00713389	-2.29907	0.00311403	0.0543455	1.05207	0.216596	0.42885	-1.23034	0.141587	0.292433	49.3399	86.2594	15.3642	6.23837	9.15488	0	13.2224	8.02179	1.36299	25.1428	2.47504	3.78155	0	0	0	1	0	0	0	0
chr14	60117914	60118113	Intergenic	-31179	Atp8a2	-3.0103	4.41435e-05	0.0027598	-3.12717	4.59924e-05	0.00315446	-2.68476	0.000172056	0.00741811	-0.0611001	0.942375	0.975269	-1.09642	0.16928	0.332137	73.2623	54.1235	8.77957	1.55959	7.12046	3.20369	9.74279	6.19866	2.72597	7.73626	4.95008	2.10086	0	1	0	1	0	1	0	0
chr2	102039457	102039656	intron (NM_001290784, intron 4 of 5)	146904	Ldlrad3	-2.24435	6.86034e-05	0.00383622	-3.1206	2.02397e-07	4.65896e-05	-2.98966	1.16409e-07	2.56216e-05	0.414253	0.521171	0.724087	-0.914868	0.150198	0.305118	103.165	165.753	27.9065	21.8343	18.3098	6.40738	19.4856	9.84493	23.1708	11.6044	9.90016	5.46224	0	1	0	1	0	1	0	0
chr4	32393366	32393565	Intergenic	-23970	Bach2	-2.45756	3.44775e-05	0.00230178	-3.1176	5.14195e-06	0.000616547	-2.1017	0.000191314	0.0080119	2.80385	5.58168e-05	0.000632459	3.12574	1.63725e-08	2.92508e-07	36.6312	40.5926	5.0169	7.79797	4.06884	1.60185	6.95914	8.75105	28.6227	32.8791	94.0516	71.0092	0	1	0	1	0	1	1	0
chr17	15821775	15821974	intron (NM_178615, intron 1 of 2)	4712	Rgmb	-3.38751	1.6426e-07	3.63196e-05	-3.1162	3.1397e-06	0.000428725	-2.17754	0.000310333	0.0113581	2.90478	1.62318e-05	0.000227378	1.34811	0.0280242	0.0854193	65.7866	84.568	6.58468	3.11919	9.15488	3.20369	12.5264	16.0436	99.4981	27.0769	27.2254	50.4207	0	1	0	1	0	1	1	0
chr3	54400033	54400232	Intergenic	39025	Postn	-2.37116	0.000743457	0.0214563	-3.116	2.45203e-05	0.0019965	-2.22023	0.00131772	0.0311662	1.41403	0.063003	0.179909	-1.65139	0.0309447	0.0923817	60.5536	111.63	16.6185	9.35756	13.2237	0	20.1815	10.5742	35.4377	9.67032	4.95008	2.94121	0	1	0	1	0	1	0	0
chr5	89036309	89036508	intron (NM_001197147, intron 4 of 25)	149148	Slc4a4	-3.25764	4.46362e-08	1.27503e-05	-3.11311	3.46865e-07	7.36545e-05	-2.59372	5.87877e-06	0.000556716	-0.893015	0.207266	0.416505	-1.81219	0.00612937	0.0241458	84.476	204.655	9.40668	17.1555	16.2753	11.2129	25.0529	16.7728	4.08896	9.67032	7.42512	3.78155	0	1	0	1	0	1	0	0
chr13	28833412	28833611	intron (NR_045053, intron 2 of 8)	51911	2610307P16Rik	-2.29749	0.00204868	0.0427861	-3.11163	8.77396e-05	0.00499318	-3.61279	2.11809e-06	0.000260449	0.437095	0.607993	0.786836	-0.563459	0.512139	0.686362	47.0972	65.963	5.95756	14.0363	7.12046	1.60185	4.17548	2.18776	2.72597	11.6044	2.47504	1.26052	0	1	0	1	0	1	0	0
chr16	5454427	5454626	Intergenic	-198570	Eef2kmt	-3.27093	0.000247718	0.0100849	-3.11075	0.000667441	0.0215136	-3.86182	1.5384e-05	0.00120576	0.484224	0.616975	0.792988	-0.0619573	0.949073	0.973345	23.9224	49.0494	3.44912	0	2.03442	3.20369	1.39183	1.09388	2.72597	5.80219	2.47504	0.420173	0	1	0	1	0	1	0	0
chr4	140868592	140868791	Intergenic	-4002	4930515B02Rik	-2.00839	0.00801493	0.104812	-3.10397	0.000152523	0.00740188	-2.21064	0.00312575	0.054465	1.38293	0.105543	0.261724	-0.50905	0.526711	0.697659	36.6312	45.6667	7.52534	9.35756	4.06884	1.60185	8.35096	5.83403	2.72597	19.3406	7.42512	2.94121	0	0	0	1	0	0	0	0
chr13	52100245	52100444	intron (NR_045061, intron 3 of 7)	3603	4921525O09Rik	-3.31611	0.000150946	0.00694264	-3.09372	0.000497165	0.0174028	-5.30485	7.98711e-09	2.89659e-06	-0.257642	0.786447	0.896242	1.67751	0.0831213	0.199159	33.6409	86.2594	3.13556	4.67878	3.05163	6.40738	0.695914	0	0	7.73626	7.42512	0.420173	0	1	0	1	0	1	0	0
chr10	95779803	95780002	Intergenic	-160761	Eea1	-2.79254	0.00017482	0.00776653	-3.09217	7.25077e-05	0.00437793	-2.05364	0.00420491	0.0666288	0.868724	0.29051	0.51598	-0.597763	0.433758	0.619472	71.7672	42.284	7.21179	4.67878	7.12046	1.60185	13.2224	9.84493	6.81494	13.5384	14.8502	2.52104	0	1	0	1	0	0	0	0
chr8	94422351	94422550	Intergenic	12653	9330175E14Rik	-1.39047	0.114361	0.508211	-3.09	0.000814522	0.0248334	-1.76205	0.0445967	0.277052	1.28978	0.17252	0.369074	-1.25408	0.172783	0.336671	31.3981	55.8149	10.0338	17.1555	3.05163	1.60185	6.95914	12.0327	0	19.3406	7.42512	0	0	0	0	1	0	0	0	0
chr12	100228515	100228714	Intergenic	28470	Calm1	-3.71728	5.25867e-06	0.000553015	-3.08902	0.000172616	0.00810168	-3.01784	0.000108075	0.00537611	0.878983	0.308202	0.53483	-1.71677	0.0558484	0.147016	48.5924	62.5803	3.13556	1.55959	3.05163	6.40738	5.56731	4.37552	1.36299	19.3406	0	0.840345	0	1	0	1	0	1	0	0
chr18	68214494	68214693	intron (NM_172631, intron 3 of 5)	46380	Mir7219	-2.3386	0.00470929	0.0743278	-3.08901	0.000433889	0.0157725	-2.30169	0.00462509	0.0706844	0.738359	0.427255	0.64881	-1.01806	0.250667	0.435537	35.8836	33.8272	4.38978	6.23837	3.05163	1.60185	1.39183	8.75105	2.72597	7.73626	2.47504	1.68069	0	0	0	1	0	0	0	0
chr3	156410220	156410419	Intergenic	151368	4930570G19Rik	-3.53929	9.63455e-08	2.36941e-05	-3.08401	4.29666e-06	0.00053366	-3.20943	5.79385e-07	9.68303e-05	-0.438081	0.555592	0.749361	-0.390174	0.576842	0.736277	79.2429	165.753	7.21179	9.35756	13.2237	9.61107	12.5264	8.75105	8.17792	7.73626	17.3253	2.52104	0	1	0	1	0	1	0	0
chr14	14801027	14801226	Intergenic	-19689	Nek10	-4.17898	3.71601e-06	0.000435853	-3.08173	0.000560724	0.0190607	-2.78713	0.00116219	0.0285815	0.270718	0.773045	0.889231	-0.357566	0.692147	0.819172	31.3981	81.1853	1.88134	0	2.03442	6.40738	6.95914	4.0109	1.36299	9.67032	9.90016	0.420173	0	1	0	1	0	1	0	0
chr9	112226630	112226829	promoter-TSS (NR_131053)	-727	2310075C17Rik	-1.76227	0.060236	0.36019	-3.08074	0.0016641	0.0406552	-4.41652	6.53602e-06	0.00061056	0.392058	0.701513	0.846693	0.727169	0.479872	0.659241	32.1457	25.3704	6.58468	6.23837	3.05163	0	0	0.364627	0	5.80219	2.47504	0	0	0	0	1	0	1	0	0
chr19	21036570	21036769	Intergenic	-68041	4930554I06Rik	-2.40398	0.00380252	0.0643797	-3.07878	0.000373384	0.0143519	-3.0312	0.000257174	0.00982273	0.794422	0.378377	0.604306	-0.391759	0.658814	0.796772	37.3787	69.3458	8.15246	6.23837	7.12046	0	6.95914	1.82314	6.81494	9.67032	7.42512	0.420173	0	0	0	1	0	1	0	0
chr14	16151918	16152117	Intergenic	-97297	Ngly1	-3.89433	5.11793e-10	3.20382e-07	-3.07691	8.07017e-07	0.000141454	-2.95724	6.02063e-07	9.97273e-05	0.789147	0.227166	0.442147	0.49381	0.42547	0.611939	72.5148	213.111	5.0169	10.9172	13.2237	14.4166	13.2224	17.1375	38.1636	11.6044	19.8003	23.9498	0	1	0	1	0	1	0	0
chr15	93563586	93563785	intron (NM_001033217, intron 1 of 7)	32206	Prickle1	-2.20865	0.0127449	0.140547	-3.07662	0.000751545	0.0234169	-2.90571	0.00104233	0.0266453	0.707759	0.451733	0.66955	-0.538595	0.562344	0.725267	22.4272	101.482	10.6609	7.79797	6.10326	1.60185	8.35096	1.82314	1.36299	15.4725	7.42512	0	0	0	0	1	0	1	0	0
chr7	78868883	78869082	Intergenic	-19295	Mir7-2	-3.86043	1.22485e-07	2.84211e-05	-3.07625	2.61547e-05	0.00208726	-2.60102	0.000117456	0.00569581	0.706485	0.365898	0.592368	-1.16368	0.127395	0.271725	44.1069	87.9507	3.76267	1.55959	8.13767	3.20369	9.74279	8.02179	8.17792	13.5384	4.95008	2.52104	0	1	0	1	0	1	0	0
chr3	68969210	68969409	intron (NM_026641, intron 5 of 19)	35261	Ift80	-2.25056	0.0025884	0.0498465	-3.07144	0.000121648	0.00635972	-2.62482	0.000393216	0.0133434	1.37312	0.0986718	0.249642	0.0949714	0.903977	0.948012	46.3496	47.3581	10.0338	4.67878	4.06884	3.20369	4.8714	6.56329	2.72597	23.2088	7.42512	5.46224	0	1	0	1	0	1	0	0
chr1	136699222	136699421	intron (NR_037986, intron 1 of 4)	3110	Platr22	-3.36721	1.88907e-06	0.000258684	-3.06926	2.33146e-05	0.00193333	-2.87083	2.194e-05	0.00160235	1.24714	0.0996977	0.251443	0.728434	0.304076	0.49487	78.4954	54.1235	4.70334	4.67878	8.13767	3.20369	6.26322	8.02179	5.45195	29.011	9.90016	14.706	0	1	0	1	0	1	0	0
chr4	15305783	15305982	Intergenic	40062	Tmem64	-3.17573	9.35597e-05	0.00489129	-3.06799	0.000262563	0.0112398	-1.97072	0.0104254	0.118241	0.470688	0.602192	0.782574	-1.26933	0.131915	0.278152	47.8448	32.1358	2.822	3.11919	3.05163	3.20369	3.47957	12.7619	4.08896	5.80219	4.95008	1.68069	0	1	0	1	0	0	0	0
chr17	52506831	52507030	Intergenic	-95779	Kcnh8	-2.98648	0.000832539	0.0230104	-3.0672	0.00073482	0.0230598	-3.33983	0.000169695	0.00735581	0.724371	0.438482	0.658515	0.803571	0.37868	0.569071	77.7478	50.7408	7.21179	1.55959	8.13767	0	4.8714	2.18776	2.72597	15.4725	17.3253	0.420173	0	1	0	1	0	1	0	0
chr7	76176350	76176549	Intergenic	-53438	Agbl1	-3.01631	2.84763e-07	5.6025e-05	-3.06262	6.49855e-07	0.000118697	-1.63676	0.00306579	0.0538351	1.42121	0.0266214	0.093297	-1.0828	0.0704539	0.175698	93.4469	99.7902	11.288	7.79797	13.2237	4.80554	27.1406	29.8994	29.9857	27.0769	22.2754	7.14293	0	1	0	1	0	0	0	0
chr2	113914360	113914559	Intergenic	-65798	Arhgap11a	-3.66234	1.32171e-07	3.01939e-05	-3.06008	1.3476e-05	0.00130436	-2.41621	0.000176598	0.00755374	1.25398	0.0882629	0.230443	-1.01894	0.156434	0.314361	43.3593	98.0989	4.38978	3.11919	9.15488	3.20369	13.2224	9.11568	21.8078	13.5384	4.95008	4.6219	0	1	0	1	0	1	0	0
chr4	57681610	57681809	intron (NM_001304544, intron 3 of 8)	113461	Palm2	-2.06242	0.00975964	0.118527	-3.05612	0.000309484	0.0126529	-3.40679	2.8028e-05	0.00193277	1.4306	0.101948	0.25525	0.310173	0.721521	0.837913	27.6603	62.5803	10.0338	6.23837	6.10326	0	3.47957	1.82314	16.3558	7.73626	7.42512	1.26052	0	0	0	1	0	1	0	0
chr15	27854117	27854316	intron (NM_001081302, intron 13 of 56)	171632	Trio	-3.40654	6.49467e-05	0.00368735	-3.05422	0.000416083	0.0153898	-3.77083	8.29471e-06	0.000731892	0.711853	0.431424	0.65275	0.68296	0.444864	0.629391	59.806	43.9754	4.70334	0	6.10326	1.60185	0.695914	3.28164	2.72597	13.5384	7.42512	2.10086	0	1	0	1	0	1	0	0
chr5	116380472	116380671	Intergenic	42293	Hspb8	-2.29468	0.015037	0.155406	-3.05045	0.00178641	0.0426913	-2.40644	0.0100479	0.115481	0.180421	0.86015	0.935149	-0.0798088	0.93436	0.964835	29.903	25.3704	5.0169	1.55959	0	3.20369	2.78365	3.64627	0	3.86813	7.42512	0.420173	0	0	0	1	0	0	0	0
chr2	60504784	60504983	intron (NM_008867, intron 6 of 29)	48425	Pla2r1	-2.90149	0.000413149	0.0147406	-3.03995	0.000407681	0.0151863	-2.51969	0.00150896	0.0339564	2.22697	0.0110444	0.0468917	0.121532	0.885298	0.937294	27.6603	37.2099	4.38978	0	4.06884	0	4.17548	4.0109	20.4448	13.5384	4.95008	4.20173	0	1	0	1	0	1	0	0
chr14	121552689	121552888	intron (NM_001347596, intron 49 of 52)	-47534	Slc15a1	-2.30759	0.00375447	0.0639893	-3.03423	0.000263618	0.011275	-3.74574	4.0192e-06	0.000420246	0.979176	0.256549	0.477847	-0.282869	0.750368	0.856624	51.5827	69.3458	5.95756	14.0363	5.08605	4.80554	2.78365	2.55239	1.36299	23.2088	4.95008	0.420173	0	0	0	1	0	1	0	0
chr7	83610035	83610234	intron (NM_177695, intron 14 of 22)	-21883	Stard5	-3.55297	5.57593e-13	8.95904e-10	-3.02818	1.40418e-09	7.43784e-07	-2.43875	1.10508e-07	2.4547e-05	0.600125	0.264082	0.485572	-0.0477851	0.922284	0.957998	159.233	184.358	11.9151	14.0363	18.3098	19.2221	29.9243	28.4409	38.1636	19.3406	19.8003	33.1936	0	1	0	1	0	1	0	0
chr18	55483643	55483842	Intergenic	-493562	Zfp608	-3.20953	7.62807e-05	0.00415937	-3.02006	0.000257939	0.011111	-3.37428	2.46275e-05	0.00175605	0.510452	0.55652	0.749947	-1.23352	0.169266	0.332137	43.3593	89.6421	5.95756	3.11919	9.15488	1.60185	2.78365	5.46941	1.36299	17.4066	2.47504	0.420173	0	1	0	1	0	1	0	0
chr4	8728875	8729074	intron (NM_001277149, intron 1 of 37)	38568	Chd7	-3.19239	1.00102e-06	0.000157683	-3.01996	7.37407e-06	0.000817115	-2.9141	3.70732e-06	0.000398575	0.56844	0.431535	0.652761	-0.905259	0.204887	0.379043	68.7769	98.0989	7.8389	6.23837	7.12046	9.61107	11.1346	7.29254	10.9039	15.4725	0	5.88242	0	1	0	1	0	1	0	0
chr10	76257304	76257503	intron (NM_009115, intron 2 of 2)	3567	S100b	-2.32898	0.00845379	0.108635	-3.01424	0.000953136	0.0277934	-3.09475	0.000472002	0.0149779	1.58375	0.0879961	0.229946	0.172376	0.85183	0.919101	42.6118	55.8149	9.40668	3.11919	6.10326	0	2.78365	3.64627	5.45195	25.1428	9.90016	0	0	0	0	1	0	1	0	0
chr18	69068463	69068662	Intergenic	-46289	Mir145b	-2.35971	0.00426808	0.069663	-3.01298	0.00045497	0.0163357	-3.54109	2.27838e-05	0.00165396	2.09663	0.0160755	0.0631311	0.773375	0.377232	0.567857	26.1651	77.8026	3.44912	12.4767	7.12046	0	2.78365	2.18776	40.8896	7.73626	9.90016	2.10086	0	0	0	1	0	1	0	0
chr10	5476393	5476592	intron (NM_001347732, intron 2 of 145)	11822	Syne1	-2.97231	9.86761e-05	0.00507618	-3.0109	0.000158653	0.00762243	-1.40874	0.0495903	0.293294	1.00839	0.230722	0.446827	-2.00832	0.0123296	0.0435609	32.1457	55.8149	5.33045	1.55959	4.06884	3.20369	8.35096	20.0545	6.81494	11.6044	2.47504	2.52104	0	1	0	1	0	0	0	0
chr14	78382151	78382350	Intergenic	-74207	Tnfsf11	-1.90919	0.0148004	0.153859	-3.00941	0.000369504	0.0142601	-1.45007	0.0578288	0.320421	2.04115	0.0181544	0.0691981	-0.192818	0.807942	0.89232	37.3787	28.7531	9.72023	3.11919	4.06884	0	7.65505	12.7619	13.6299	17.4066	17.3253	3.36138	0	0	0	1	0	0	0	0
chr15	94214543	94214742	Intergenic	-32560	D630010B17Rik	-2.45134	0.000129456	0.00618946	-3.00379	7.45439e-06	0.000822234	-3.14478	9.01e-07	0.000132961	-0.0215568	0.976398	0.990703	-0.234977	0.735316	0.846942	74.0099	140.383	17.2456	15.5959	14.2409	6.40738	13.9183	5.83403	17.7188	1.93406	9.90016	6.72276	0	1	0	1	0	1	0	0
chr1	183134590	183134789	intron (NM_026866, intron 4 of 9)	12868	Disp1	-2.50125	0.00165739	0.0370717	-2.99791	0.000310539	0.0126852	-4.79768	1.73276e-08	5.38853e-06	-0.259025	0.775896	0.890648	1.91455	0.0323246	0.0957422	50.0875	54.1235	4.38978	10.9172	3.05163	6.40738	0.695914	0.729254	0	7.73626	9.90016	2.52104	0	1	0	1	0	1	0	0
chr3	148913551	148913750	intron (NM_001081298, intron 1 of 23)	40985	Adgrl2	-2.94491	0.000119474	0.00584068	-2.99721	0.000128241	0.00660413	-2.83378	0.000164961	0.00720845	-0.747334	0.385312	0.610828	-1.76419	0.0364728	0.105305	122.602	57.5062	12.8558	3.11919	14.2409	1.60185	12.5264	6.92791	2.72597	5.80219	4.95008	0.420173	0	1	0	1	0	1	0	0
chr13	9030456	9030655	Intergenic	-34543	Gtpbp4	-3.60221	1.56424e-05	0.00128185	-2.99694	0.000334232	0.0134144	-3.18103	9.29513e-05	0.00485948	0.702811	0.414708	0.637591	-1.02535	0.243619	0.427404	32.1457	147.148	6.27112	1.55959	14.2409	0	10.4387	2.91702	5.45195	23.2088	2.47504	2.10086	0	1	0	1	0	1	0	0
chr2	18967757	18967956	intron (NM_008845, intron 1 of 9)	30265	Pip4k2a	-2.54444	0.00127635	0.0309003	-2.99665	0.000375831	0.0144119	-2.38318	0.00192631	0.0395283	1.03749	0.244949	0.464309	0.124061	0.879324	0.934438	25.4175	37.2099	4.38978	3.11919	3.05163	1.60185	3.47957	5.46941	5.45195	7.73626	4.95008	5.04207	0	1	0	1	0	1	0	0
chr17	87513955	87514154	Intergenic	-67119	Calm2	-1.75115	0.033483	0.258474	-2.98987	0.000558753	0.0190205	-2.31866	0.00475972	0.071876	1.78684	0.0428592	0.134577	0.0943469	0.911772	0.952189	52.3302	40.5926	14.7371	6.23837	6.10326	0	7.65505	5.83403	1.36299	34.8132	12.3752	3.78155	0	0	0	1	0	0	0	0
chr5	136693528	136693727	promoter-TSS (NM_001303021)	-49	Myl10	-2.46508	0.00511682	0.0783702	-2.98918	0.00118826	0.0320337	-3.14718	0.000359989	0.0125377	1.44718	0.128322	0.300948	0.381445	0.682934	0.813494	24.67	30.4445	1.56778	6.23837	2.03442	1.60185	2.08774	1.45851	2.72597	13.5384	4.95008	1.26052	0	0	0	1	0	1	0	0
chr6	108524310	108524509	intron (NM_010585, intron 60 of 61)	34666	Mir7661	-3.18175	2.33473e-05	0.00170708	-2.98868	9.95628e-05	0.00549728	-3.36082	5.69271e-06	0.000544444	1.50979	0.0552562	0.162783	1.40252	0.0662921	0.167606	33.6409	111.63	4.07623	7.79797	5.08605	8.00923	0.695914	8.38642	25.8968	19.3406	24.7504	8.82363	0	1	0	1	0	1	0	0
chr9	115330968	115331167	Intergenic	-5094	4930428G15Rik	-2.74147	0.0043273	0.070238	-2.98552	0.00226892	0.0499846	-2.66242	0.0050903	0.0750573	0.429932	0.670277	0.828778	-0.150901	0.877833	0.933553	42.6118	32.1358	1.88134	4.67878	4.06884	0	1.39183	5.10478	0	7.73626	7.42512	0	0	0	0	1	0	0	0	0
chr9	115526434	115526633	Intergenic	144714	Mir467h	-2.18102	0.00780939	0.102832	-2.97449	0.000574192	0.0193954	-2.50741	0.00204132	0.0412376	0.7306	0.421257	0.643172	-0.250724	0.771339	0.869832	39.6215	40.5926	8.15246	4.67878	3.05163	3.20369	6.26322	4.0109	0	13.5384	7.42512	2.10086	0	0	0	1	0	1	0	0
chr3	146063269	146063468	exon (NM_172864, exon 15 of 23)	44668	Wdr63	-2.72059	2.13398e-05	0.00161733	-2.95646	1.10228e-05	0.00112807	-1.78606	0.00352606	0.0587702	-0.570405	0.461255	0.677207	-2.00146	0.00429963	0.0178418	62.7963	94.7162	11.288	7.79797	12.2065	3.20369	16.7019	23.7008	4.08896	5.80219	2.47504	4.6219	0	1	0	1	0	0	0	0
chr14	121540962	121541161	TTS (NM_134074)	-35807	Slc15a1	-3.73811	9.40111e-05	0.00489391	-2.95452	0.00200718	0.0462314	-4.38686	4.77202e-06	0.000479211	-0.0143806	0.988542	0.995295	0.778959	0.438058	0.623427	38.8739	47.3581	2.19489	0	6.10326	0	0	1.09388	2.72597	3.86813	4.95008	0	0	1	0	1	0	1	0	0
chr14	8615731	8615930	intron (NM_028934, intron 4 of 15)	50460	4930452B06Rik	-3.17926	2.01029e-05	0.00154545	-2.94917	0.000101198	0.00556211	-3.04359	2.97823e-05	0.0020305	0.204658	0.799627	0.90394	-1.32932	0.104689	0.235925	59.806	109.938	7.21179	6.23837	11.1893	4.80554	9.74279	5.83403	8.17792	11.6044	7.42512	0	0	1	0	1	0	1	0	0
chr3	115940582	115940781	3' UTR (NM_023214, exon 11 of 11)	-39221	Mir669n	-3.2125	0.000104911	0.00528095	-2.94604	0.000476077	0.0168983	-3.34712	4.03506e-05	0.00256256	1.20057	0.167869	0.362052	0.091616	0.916354	0.954595	29.1554	74.4198	2.822	4.67878	8.13767	0	3.47957	2.91702	6.81494	19.3406	7.42512	1.26052	0	1	0	1	0	1	0	0
chr6	127991851	127992050	intron (NM_175414, intron 3 of 8)	104328	Tspan11	-3.53396	9.71322e-06	0.000880069	-2.94419	0.000236314	0.0103365	-4.75561	5.35968e-09	2.18938e-06	-0.0710068	0.933119	0.970948	0.310522	0.726024	0.841003	102.418	94.7162	5.33045	6.23837	5.08605	14.4166	1.39183	2.18776	1.36299	17.4066	7.42512	0	0	1	0	1	0	1	0	0
chr3	68974797	68974996	intron (NM_026641, intron 5 of 19)	29674	Ift80	-2.39911	0.0021013	0.0433963	-2.9406	0.000338546	0.01352	-2.31053	0.00252328	0.0476036	-0.00482998	0.995688	0.99809	-0.863721	0.298487	0.489328	23.9224	69.3458	5.95756	7.79797	6.10326	1.60185	3.47957	10.5742	4.08896	3.86813	4.95008	2.52104	0	1	0	1	0	1	0	0
chr12	28800619	28800818	intron (NM_201357, intron 3 of 8)	48890	Eipr1	-2.82973	0.000583274	0.0181974	-2.94004	0.000533046	0.0184186	-3.79764	5.04942e-06	0.000497799	0.0226458	0.980221	0.992262	0.762883	0.387998	0.578124	43.3593	52.4322	3.76267	6.23837	5.08605	3.20369	2.08774	1.82314	1.36299	7.73626	9.90016	0.840345	0	1	0	1	0	1	0	0
chr6	99395831	99396030	intron (NM_001347345, intron 2 of 19)	39415	Foxp1	-3.31549	0.000129562	0.00618946	-2.93579	0.000807681	0.024761	-2.7884	0.000920762	0.0242926	0.323835	0.725388	0.860469	-1.42115	0.124025	0.266589	42.6118	60.889	5.0169	0	8.13767	0	3.47957	6.56329	2.72597	9.67032	2.47504	0.420173	0	1	0	1	0	1	0	0
chr15	59092492	59092691	Intergenic	-10565	Mtss1	-1.02377	0.122689	0.524855	-2.93496	0.000109175	0.00586019	-2.224	0.000960638	0.0250431	2.07115	0.00792205	0.0359329	1.04958	0.131535	0.277658	44.8545	23.679	17.2456	14.0363	4.06884	1.60185	6.95914	5.46941	20.4448	15.4725	9.90016	16.8069	0	0	0	1	0	1	0	0
chr5	119633738	119633937	non-coding (NR_046178, exon 4 of 4)	7895	Gm16063	-2.37127	0.0111179	0.129103	-2.93479	0.00215123	0.0483421	-3.94848	3.19571e-05	0.00214242	0.593497	0.547162	0.743105	1.23555	0.206535	0.381214	28.4078	57.5062	3.44912	7.79797	4.06884	1.60185	0.695914	1.09388	0	11.6044	9.90016	0	0	0	0	1	0	1	0	0
chr12	100282365	100282564	intron (NR_045741, intron 1 of 3)	5855	Gm10432	-2.36297	0.000444891	0.0154947	-2.93312	3.12827e-05	0.00238213	-2.69218	5.37541e-05	0.00319883	-0.314678	0.685341	0.837066	-1.52207	0.0447447	0.12401	71.7672	106.556	12.5422	17.1555	14.2409	3.20369	13.9183	8.75105	1.36299	13.5384	4.95008	2.10086	0	1	0	1	0	1	0	0
chr2	61051933	61052132	Intergenic	-76881	Gm13582	-2.77516	3.34624e-05	0.00225588	-2.9252	2.19771e-05	0.00185523	-3.76831	2.4528e-08	7.19415e-06	0.397016	0.586143	0.770959	-0.387936	0.606988	0.759177	53.8254	160.679	15.0507	9.35756	11.1893	11.2129	5.56731	5.83403	13.6299	17.4066	9.90016	1.26052	0	1	0	1	0	1	0	0
chr15	93530745	93530944	intron (NM_001033217, intron 1 of 7)	65047	Prickle1	-1.95303	0.00414736	0.0683925	-2.90971	7.44524e-05	0.00444703	-4.49882	1.70946e-09	8.4948e-07	0.0528475	0.948034	0.977676	-0.0430236	0.960354	0.979372	56.0681	59.1976	10.0338	17.1555	7.12046	4.80554	2.08774	1.09388	6.81494	5.80219	2.47504	0.840345	0	0	0	1	0	1	0	0
chr14	53762945	53763144	Intergenic	490885	Dad1	-2.86415	0.00094668	0.0251831	-2.90436	0.00115016	0.0314464	-2.79395	0.000997793	0.0257724	-0.915659	0.357461	0.584339	-0.156014	0.863221	0.925384	35.136	33.8272	4.07623	1.55959	4.06884	1.60185	3.47957	3.28164	1.36299	0	0	4.20173	0	1	0	1	0	1	0	0
chr7	58483606	58483805	Intergenic	-174497	Atp10a	-2.4076	0.00237564	0.047085	-2.90159	0.000425958	0.0156243	-1.86211	0.0161728	0.154767	3.52778	1.79587e-05	0.000247327	1.1602	0.13776	0.286677	20.9321	79.4939	9.09312	3.11919	7.12046	0	19.4856	2.55239	130.847	30.945	37.1256	20.5885	0	1	0	1	0	0	1	0
chr8	108820710	108820909	intron (NM_007496, intron 3 of 9)	106165	Zfhx3	-1.43313	0.0797317	0.421241	-2.89896	0.00109499	0.030553	-2.66262	0.00134108	0.0315345	2.21433	0.0142485	0.057459	0.921076	0.285606	0.475012	29.1554	20.2963	5.33045	10.9172	3.05163	0	3.47957	1.82314	13.6299	15.4725	12.3752	2.10086	0	0	0	1	0	1	0	0
[truncated: 550 more rows]

## Sheet: 840 M7 mDHSs
Annotation						Deseq 2 Fold changeanalysis															Read counts												Peak Groups
						M7/Naïve			M28/Naïve			M56/Naïve			M28Ag/M28			M56Ag/M56			Naïve		M7		M28		M56		M28Ag		M56Ag		M7		M28		M56		M28Ag
[truncated: 841 more rows]

## Sheet: 1193 M7 nDHSs
Annotation						Deseq 2 Fold changeanalysis															Read counts												Peak Groups
[truncated: 1,195 more rows]

[truncated: 4 more sheets: 1010 M56 mDHSs, 957 M56 nDHSs, 6703 M28 iDHSs, 1935 M28 dDHSs]
